# Supplementary material for: Comprehensive analysis of the prognostic value and functions of prefoldins in hepatocellular carcinoma
Source: Front Mol Biosci. 2022 Nov 11;9:957001. doi: 10.3389/fmolb.2022.957001 (PMC9691963; doi:10.3389/fmolb.2022.957001)
Supplement: Supplementary file 2 [file Table9.XLSX]

## Sheet: Sheet 1
ID	Description	setSize	enrichmentScore	NES	pvalue	p.adjust	qvalues	rank	leading_edge	core_enrichment
REACTOME_GPCR_LIGAND_BINDING	REACTOME_GPCR_LIGAND_BINDING	458	0.350181	1.41839	0.00106045	0.0449944	0.0333012	4665	tags=24%, list=13%, signal=21%	NTS/WNT3A/SST/CALCA/CGA/GCG/RXFP4/TAC1/CCK/RLN3/GAL/KISS1R/UCN2/TRH/GIP/CXCL5/HCRT/CCR3/NPY/KISS1/TACR3/MTNR1B/CCKBR/HTR2C/WNT6/PRLHR/CXCL1/LPAR3/GNG4/PLPPR5/AVP/ADORA1/UCN3/UTS2/NMU/CCL1/LHB/MCHR2/GPRC6A/FZD9/NMB/GRM1/ADRA1D/CHRM1/PPY/HCRTR2/GPR37L1/KEL/FZD2/GRM3/GNG8/OPRK1/CCL20/XCL1/CNR1/DRD2/GHRHR/TAAR6/P2RY6/GPHA2/NPFFR2/TAAR8/GNGT1/TACR2/FFAR3/GPR35/GIPR/HTR5A/CCL3L3/CCL13/PENK/ADM2/FFAR2/C…
REACTOME_M_PHASE	REACTOME_M_PHASE	414	0.415803	1.67068	0.00107875	0.0449944	0.0333012	9444	tags=41%, list=26%, signal=30%	TUBA3E/TUBA3C/UBE2C/TUBB8/CENPM/AURKB/UBE2S/NUF2/CDC20/PTTG1/H3C7/TUBAL3/H2AC20/H2BC10/H3C11/H3C14/H3C4/SKA1/HAUS7/KIF2C/PSMD4/TUBA4B/PMF1/H2AC18/BIRC5/CENPA/PSMB4/SPC24/LMNA/RPS27/SSNA1/PLK1/MZT2B/H2BC9/SPC25/TUBA4A/H2AX/MZT2A/PSMB3/TUBB8B/H3-4/CDK1/CCNB1/H2BU1/NDC80/NCAPG/H2AC14/NEK2/CENPL/ANAPC11/TUBB4B/H2AB1/CSNK2B/CENPF/SEM1/CEP131/H4C13/NUDC/NCAPH2/H4C11/ENSA/KIF20A/CCNB2/SGO2/CDCA5/H4C2/UB…
REACTOME_DNA_REPAIR	REACTOME_DNA_REPAIR	330	0.351054	1.39001	0.00437158	0.0459984	0.0340442	9358	tags=37%, list=26%, signal=27%	EYA4/SLX1A/H2AC20/UBE2T/H2BC10/H2AC18/H2BC9/EME1/POLR2J/H2AX/SLX1B/EXO1/H3-4/H2BU1/PCLAF/H2AC14/NEIL3/POLR2I/H2AB1/SIRT6/EYA1/BLM/H4C13/H4C11/POLR2H/TFPT/H4C2/UBA52/H2AC4/POLR2K/USP43/RBX1/RAD51/ACD/ISY1/H4C5/RFC4/POLR2L/H2AJ/H4C4/TIPIN/KPNA2/FANCD2/FAAP24/ACTR5/RMI2/H2AC7/CENPX/RPS27A/ERCC1/FANCB/INO80B/MCRS1/H2AC19/POLD1/CCNA1/RUVBL1/GTF2H5/PNKP/FANCE/SMUG1/ISG15/POLQ/ACTB/CENPS/NTHL1/POLR2G/DT…
REACTOME_CLASS_A_1_RHODOPSIN_LIKE_RECEPTORS_	REACTOME_CLASS_A_1_RHODOPSIN_LIKE_RECEPTORS_	326	0.365901	1.44999	0.00217155	0.0449944	0.0333012	4427	tags=25%, list=12%, signal=22%	NTS/SST/CGA/RXFP4/TAC1/CCK/RLN3/GAL/KISS1R/TRH/CXCL5/HCRT/CCR3/NPY/KISS1/TACR3/MTNR1B/CCKBR/HTR2C/PRLHR/CXCL1/LPAR3/PLPPR5/AVP/ADORA1/UTS2/NMU/CCL1/LHB/MCHR2/NMB/ADRA1D/CHRM1/PPY/HCRTR2/GPR37L1/KEL/OPRK1/CCL20/XCL1/CNR1/DRD2/TAAR6/P2RY6/GPHA2/NPFFR2/TAAR8/TACR2/FFAR3/GPR35/HTR5A/CCL3L3/CCL13/PENK/FFAR2/CCL7/SSTR2/PMCH/CCL19/RLN2/FFAR1/NPSR1/LPAR2/RGR/SSTR5/OPRD1/C5AR2/ADRA2C/GHSR/XCL2/RHO/SSTR3/E…
REACTOME_RHO_GTPASE_EFFECTORS	REACTOME_RHO_GTPASE_EFFECTORS	322	0.402165	1.59283	0.00108814	0.0449944	0.0333012	9938	tags=46%, list=28%, signal=34%	KLK3/TUBA3E/TUBA3C/S100A9/KLK2/NOX3/TUBB8/S100A8/CENPM/AURKB/SFN/KLC3/NUF2/CDC20/H3C7/TUBAL3/H2AC20/H2BC10/H3C11/H3C14/H3C4/SKA1/KIF2C/TUBA4B/IQGAP3/PMF1/H2AC18/BIRC5/WIPF3/CENPA/SPC24/RPS27/PLK1/H2BC9/SPC25/TUBA4A/LIN7B/H2AX/TAX1BP3/TUBB8B/NOX1/H2BU1/NDC80/PKN1/H2AC14/ARPC4/CENPL/TUBB4B/H2AB1/ARPC1B/CENPF/H4C13/NUDC/RHPN1/H4C11/SGO2/H4C2/DYNLL1/H2AC4/CENPH/RHOD/RHOG/BUB1B/CYBA/ARPC5/TUBA3D/SGO1/…
REACTOME_TRANSLATION	REACTOME_TRANSLATION	293	0.571786	2.24877	0.00111111	0.0449944	0.0333012	9882	tags=60%, list=28%, signal=44%	RPS4Y2/MRPL55/RPL8/MRPL24/RPL10L/MRPS21/EIF4EBP1/SSR2/GADD45GIP1/RPL35/RPL36A/RPL13/RPL39L/EEF1G/RPS27/RPL38/RPL36/RPL28/RPL14/RPL37/RPL22L1/RPS21/RPS15/MRPL52/MRPL12/RPLP2/RPS20/RPSA/RPL18/RPS19/MRPL23/RPS2/RPL37A/RPS28/SEC61G/RPL32/RPL12/RPL18A/MRPL41/EEF1E1/RPL39/RPL29/RPL24/RPL7/RPL30/RPS24/RPLP1/MRPL9/RPL27A/SSR4/RPL23A/RPS10/RPS6/MRPL14/RPS18/RPS16/RPL35A/EEF1A2/RPS14/MRPL47/RPL23/MRPL28/RP…
REACTOME_CELL_CYCLE_CHECKPOINTS	REACTOME_CELL_CYCLE_CHECKPOINTS	292	0.440656	1.734	0.00110865	0.0449944	0.0333012	10455	tags=49%, list=29%, signal=35%	UBE2C/CENPM/AURKB/UBE2S/SFN/NUF2/CDC20/H2BC10/SKA1/KIF2C/PSMD4/PMF1/BIRC5/ORC6/CENPA/PSMB4/CDKN2A/SPC24/CDC25A/RPS27/PLK1/CDC45/H2BC9/GTSE1/SPC25/H2AX/EXO1/PKMYT1/PSMB3/H3-4/CDK1/PCBP4/CCNB1/H2BU1/NDC80/CENPL/ANAPC11/CENPF/SEM1/BLM/H4C13/NUDC/H4C11/CCNB2/SGO2/H4C2/MCM10/UBA52/DYNLL1/CENPH/CDC6/BUB1B/SGO1/H4C5/PSMB6/RFC4/CDCA8/H4C4/ANAPC7/PSMB9/CDC25C/RMI2/MCM5/RPS27A/MCM7/RANGAP1/PSMB8/PSME2/ITGB…
REACTOME_PROCESSING_OF_CAPPED_INTRON_CONTAINING_PRE_MRNA	REACTOME_PROCESSING_OF_CAPPED_INTRON_CONTAINING_PRE_MRNA	242	0.398632	1.54964	0.00113766	0.0449944	0.0333012	11019	tags=42%, list=31%, signal=29%	LUZP4/SNRPD2/SNRPE/DDX39A/LSM7/SNRPF/SF3B4/SNRPB/POLR2J/PRCC/SNRPA/LSM4/NXT1/PQBP1/PUF60/SNRPN/POLR2I/SF3A2/SNRNP35/SNRPD1/SF3B5/PPIH/ALYREF/POLR2H/SNU13/SNRPC/POLR2K/U2AF1L4/SARNP/ISY1/SNRPG/THOC7/TXNL4A/LSM2/THOC6/POLR2L/MAGOHB/ZMAT5/PABPN1/SNRPA1/PRPF31/CHTOP/RBM8A/SNRNP25/PRPF3/PRPF6/POLR2G/MAGOH/NUP93/POLR2F/SART1/SNRNP70/THOC5/CWC15/THOC1/SYMPK/BUD31/CPSF4/NUP62/SNRPD3/NUP210/SRRT/NXF2B/SNR…
REACTOME_MITOTIC_METAPHASE_AND_ANAPHASE	REACTOME_MITOTIC_METAPHASE_AND_ANAPHASE	236	0.473203	1.83909	0.00113636	0.0449944	0.0333012	10316	tags=49%, list=29%, signal=35%	TUBA3E/TUBA3C/UBE2C/TUBB8/CENPM/AURKB/UBE2S/NUF2/CDC20/PTTG1/TUBAL3/SKA1/KIF2C/PSMD4/TUBA4B/PMF1/BIRC5/CENPA/PSMB4/SPC24/LMNA/RPS27/PLK1/SPC25/TUBA4A/PSMB3/TUBB8B/CDK1/CCNB1/NDC80/CENPL/ANAPC11/TUBB4B/CENPF/SEM1/NUDC/CCNB2/SGO2/CDCA5/UBA52/DYNLL1/CENPH/BANF1/BUB1B/CHMP2A/TUBA3D/SGO1/PSMB6/CDCA8/ANAPC7/PSMB9/CHMP4A/RPS27A/TUBB4A/RANGAP1/PSMB8/PSME2/ITGB3BP/PSMB1/CENPO/PPP2R1A/ERCC6L/TUBA1C/RCC2/PS…
REACTOME_SIGNALING_BY_ROBO_RECEPTORS	REACTOME_SIGNALING_BY_ROBO_RECEPTORS	218	0.548335	2.11446	0.00115473	0.0449944	0.0333012	8895	tags=57%, list=25%, signal=43%	RPS4Y2/RPL8/ISL1/RPL10L/RPL35/PSMD4/MSI1/RPL36A/RPL13/RPL39L/PSMB4/RPS27/RPL38/RPL36/RPL28/RPL14/RPL37/RPL22L1/RPS21/RPS15/ELOB/RPLP2/RPS20/RPSA/RPL18/RPS19/RPS2/RPL37A/RPS28/RPL32/RPL12/ELOC/PSMB3/RPL18A/RPL39/RPL29/RPL24/RPL7/RPL30/RPS24/RPLP1/RPL27A/RPL23A/RPS10/RPS6/RPS18/SEM1/RPS16/RPL35A/RPS14/RPL23/RPL19/RPS11/RPL7A/RPL27/RPS9/RPS8/RPS3/UBA52/RPL26/RPS5/RPL31/RBX1/COL4A5/RPS26/ARHGAP39/LHX…
REACTOME_KERATINIZATION	REACTOME_KERATINIZATION	210	0.419551	1.61144	0.00116414	0.0449944	0.0333012	5039	tags=25%, list=14%, signal=21%	SPRR2D/KRTAP5-5/CASP14/KRTAP20-2/KRTAP19-5/KRT25/KRT78/KRT28/KLK8/KRT5/KRTAP19-1/KRT4/KRTAP6-3/KRTAP5-7/KRT75/KRT13/KRTAP4-1/LCE1F/KRT9/KRTAP3-1/SPRR3/KRTAP5-10/KRT3/KRT79/KRT34/KRTAP19-3/KRT38/KRT23/KRT17/KRT14/KLK14/KRTAP5-8/KRT6A/KRT15/KRTAP5-11/KRTAP10-2/PKP3/KRT36/KLK12/KLK5/KRTAP19-4/SPRR1B/KRTAP5-4/KRTAP5-1/KRT10/KRT6C/RPTN/CELA2A/KRT74/DSG3/SPRR2F/KRTAP16-1
REACTOME_RRNA_PROCESSING	REACTOME_RRNA_PROCESSING	203	0.626639	2.39889	0.00117371	0.0449944	0.0333012	9185	tags=67%, list=26%, signal=50%	EXOSC4/RPS4Y2/BOP1/RPL8/RPL10L/RPL35/RPP25/RPL36A/RPL13/RPL39L/RPS27/RPL38/RPL36/RPL28/RPL14/RPL37/RPL22L1/RPS21/RPS15/RPLP2/FBL/RPS20/RPSA/RPL18/RPS19/RPP21/RPS2/RPL37A/RPS28/RPL32/RPL12/RPL18A/RRP9/RPL39/RPL29/DCAF13/RRP7A/RPL24/EXOSC5/RPL7/NOP56/RPL30/RPS24/RPLP1/RPL27A/RPL23A/RPS10/RPS6/RPS18/EMG1/RPS16/RPL35A/RPS14/RPL23/RRP1/EXOSC1/NOL12/RPL19/TRMT112/RPS11/RPL7A/RPL27/RPS9/SNU13/RPS8/RPS3/…
REACTOME_MITOTIC_PROMETAPHASE	REACTOME_MITOTIC_PROMETAPHASE	202	0.432768	1.65396	0.00117509	0.0449944	0.0333012	8893	tags=40%, list=25%, signal=30%	TUBA3E/TUBA3C/TUBB8/CENPM/AURKB/NUF2/CDC20/TUBAL3/SKA1/HAUS7/KIF2C/TUBA4B/PMF1/BIRC5/CENPA/SPC24/RPS27/SSNA1/PLK1/MZT2B/SPC25/TUBA4A/MZT2A/TUBB8B/CDK1/CCNB1/NDC80/NCAPG/NEK2/CENPL/TUBB4B/CSNK2B/CENPF/CEP131/NUDC/CCNB2/SGO2/CDCA5/DYNLL1/SFI1/CENPH/HAUS8/BUB1B/TUBA3D/SGO1/CDCA8/CEP72/TUBB4A/RANGAP1/ITGB3BP/CENPO/PPP2R1A/ERCC6L/TUBA1C/CENPJ/RCC2/CENPS/TUBG1/HAUS1/TUBB2B/NME7/ZWINT/BUB1/KIF18A/CENPT/…
REACTOME_MITOTIC_G2_G2_M_PHASES	REACTOME_MITOTIC_G2_G2_M_PHASES	199	0.43866	1.67605	0.00117371	0.0449944	0.0333012	10370	tags=45%, list=29%, signal=32%	TUBA3E/TUBA3C/MYBL2/TUBB8/TUBAL3/HAUS7/PSMD4/TUBA4B/PSMB4/CDC25A/SSNA1/PLK1/MZT2B/GTSE1/TUBA4A/MZT2A/PKMYT1/PSMB3/TUBB8B/CDK1/CCNB1/NEK2/TUBB4B/CENPF/SEM1/CEP131/CCNB2/TPX2/UBA52/DYNLL1/SFI1/RBX1/LIN37/HAUS8/TUBA3D/PSMB6/PSMB9/CDC25C/AURKA/CEP72/RPS27A/TUBB4A/PSMB8/PSME2/PSMB1/PPP2R1A/CCNA1/FKBPL/LCMT1/E2F1/TUBA1C/CENPJ/PSMD13/PSMB7/TUBG1/PSMC4/HAUS1/TUBB2B/PPP2R3B/NME7/PSMC5/PSMC3/TUBA1A/PSMD14/…
REACTOME_PEPTIDE_LIGAND_BINDING_RECEPTORS	REACTOME_PEPTIDE_LIGAND_BINDING_RECEPTORS	195	0.419701	1.59702	0.00236686	0.0449944	0.0333012	4365	tags=27%, list=12%, signal=24%	NTS/SST/RXFP4/TAC1/CCK/RLN3/GAL/KISS1R/TRH/CXCL5/HCRT/CCR3/NPY/KISS1/TACR3/CCKBR/PRLHR/CXCL1/AVP/UTS2/NMU/CCL1/MCHR2/NMB/PPY/HCRTR2/GPR37L1/KEL/OPRK1/CCL20/XCL1/NPFFR2/TACR2/CCL3L3/CCL13/PENK/CCL7/SSTR2/PMCH/CCL19/RLN2/NPSR1/SSTR5/OPRD1/C5AR2/GHSR/XCL2/SSTR3/ECE2/QRFP/TAC3/CXCR1
REACTOME_SEPARATION_OF_SISTER_CHROMATIDS	REACTOME_SEPARATION_OF_SISTER_CHROMATIDS	191	0.493752	1.87867	0.00118343	0.0449944	0.0333012	10262	tags=51%, list=29%, signal=37%	TUBA3E/TUBA3C/UBE2C/TUBB8/CENPM/AURKB/UBE2S/NUF2/CDC20/PTTG1/TUBAL3/SKA1/KIF2C/PSMD4/TUBA4B/PMF1/BIRC5/CENPA/PSMB4/SPC24/RPS27/PLK1/SPC25/TUBA4A/PSMB3/TUBB8B/NDC80/CENPL/ANAPC11/TUBB4B/CENPF/SEM1/NUDC/SGO2/CDCA5/UBA52/DYNLL1/CENPH/BUB1B/TUBA3D/SGO1/PSMB6/CDCA8/ANAPC7/PSMB9/RPS27A/TUBB4A/RANGAP1/PSMB8/PSME2/ITGB3BP/PSMB1/CENPO/PPP2R1A/ERCC6L/TUBA1C/RCC2/PSMD13/PSMB7/CENPS/PSMC4/TUBB2B/ZWINT/PSMC5/…
REACTOME_MRNA_SPLICING	REACTOME_MRNA_SPLICING	188	0.410238	1.55687	0.00237248	0.0449944	0.0333012	11019	tags=43%, list=31%, signal=30%	SNRPD2/SNRPE/LSM7/SNRPF/SF3B4/SNRPB/POLR2J/PRCC/SNRPA/LSM4/PQBP1/PUF60/SNRPN/POLR2I/SF3A2/SNRNP35/SNRPD1/SF3B5/PPIH/ALYREF/POLR2H/SNU13/SNRPC/POLR2K/U2AF1L4/ISY1/SNRPG/TXNL4A/LSM2/POLR2L/MAGOHB/ZMAT5/PABPN1/SNRPA1/PRPF31/RBM8A/SNRNP25/PRPF3/PRPF6/POLR2G/MAGOH/POLR2F/SART1/SNRNP70/CWC15/SYMPK/BUD31/CPSF4/SNRPD3/SRRT/SNRPB2/RNPS1/CD2BP2/PHF5A/GTF2F2/ZRSR2/SUGP1/LSM5/CPSF1/PPIE/XAB2/YBX1/SF3B6/LSM3/…
KEGG_HUNTINGTONS_DISEASE	KEGG_HUNTINGTONS_DISEASE	174	0.426313	1.60561	0.00238949	0.0449944	0.0333012	10970	tags=53%, list=31%, signal=37%	COX8C/UCP1/NDUFA4L2/COX7B2/COX7A1/COX6C/COX6B1/NDUFB9/NDUFA3/ATP5MC1/NDUFA7/POLR2J/NDUFB7/NDUFS6/CYC1/ATP5MC1P5/TBPL2/CLTB/HAP1/CLTA/POLR2I/ATP5F1D/COX4I1/NDUFS5/NDUFA2/GPX1/NDUFA1/UQCRB/AP2S1/POLR2H/COX4I2/NDUFS8/ATP5F1E/UQCRQ/BAX/POLR2K/COX5B/UQCRH/ATP5MC2/NDUFB8/NDUFA8/POLR2L/UQCR10/NDUFV2/NDUFB3/NDUFA6/GRIN1/COX6A1/COX7B/UQCR11/COX8A/POLR2G/ATP5PD/UQCRHL/NDUFB4/NDUFB10/POLR2F/NDUFB1/CREB3L4/C…
REACTOME_REGULATION_OF_EXPRESSION_OF_SLITS_AND_ROBOS	REACTOME_REGULATION_OF_EXPRESSION_OF_SLITS_AND_ROBOS	172	0.627933	2.35996	0.00120627	0.0449944	0.0333012	8876	tags=67%, list=25%, signal=51%	RPS4Y2/RPL8/ISL1/RPL10L/RPL35/PSMD4/MSI1/RPL36A/RPL13/RPL39L/PSMB4/RPS27/RPL38/RPL36/RPL28/RPL14/RPL37/RPL22L1/RPS21/RPS15/ELOB/RPLP2/RPS20/RPSA/RPL18/RPS19/RPS2/RPL37A/RPS28/RPL32/RPL12/ELOC/PSMB3/RPL18A/RPL39/RPL29/RPL24/RPL7/RPL30/RPS24/RPLP1/RPL27A/RPL23A/RPS10/RPS6/RPS18/SEM1/RPS16/RPL35A/RPS14/RPL23/RPL19/RPS11/RPL7A/RPL27/RPS9/RPS8/RPS3/UBA52/RPL26/RPS5/RPL31/RBX1/COL4A5/RPS26/LHX4/RPS7/PS…
REACTOME_G2_M_CHECKPOINTS	REACTOME_G2_M_CHECKPOINTS	168	0.43043	1.6139	0.00241838	0.0449944	0.0333012	10391	tags=48%, list=29%, signal=34%	SFN/H2BC10/PSMD4/ORC6/PSMB4/CDC25A/CDC45/H2BC9/GTSE1/H2AX/EXO1/PKMYT1/PSMB3/H3-4/CDK1/CCNB1/H2BU1/SEM1/BLM/H4C13/H4C11/CCNB2/H4C2/MCM10/UBA52/CDC6/H4C5/PSMB6/RFC4/H4C4/PSMB9/CDC25C/RMI2/MCM5/RPS27A/MCM7/PSMB8/PSME2/PSMB1/PSMD13/ORC1/PSMB7/PSMC4/H4C14/BABAM1/MCM2/PSMC5/DNA2/CHEK1/H4C15/PSMC3/YWHAZ/PSMD14/MCM4/RFC2/H4C1/H4C6/H2BC3/RAD9A/PSMA4/PSMB2/PSMB5/H2BC14/H2BC17/H2BC11/CDC7/PSMA7/CHEK2/PIAS4/…
REACTOME_S_PHASE	REACTOME_S_PHASE	162	0.429531	1.60815	0.00239234	0.0449944	0.0333012	10374	tags=44%, list=29%, signal=31%	UBE2C/UBE2S/PSMD4/CDT1/ORC6/PSMB4/CDC25A/CKS1B/CDC45/PSMB3/ANAPC11/SEM1/CDCA5/UBA52/CDC6/RBX1/LIN37/PSMB6/RFC4/ANAPC7/PSMB9/GINS2/GINS1/MCM5/RPS27A/MCM7/PSMB8/PSME2/PSMB1/POLD1/CCNA1/E2F1/PSMD13/ORC1/PSMB7/PSMC4/POLE4/MCM2/PSMC5/E2F5/DNA2/PSMC3/E2F4/PSMD14/CDC25B/POLA2/LIN9/MCM4/RFC2/POLE2/CDK7/PSMA4/CDC16/PSMB2/UBE2E1/PSMB5/POLD2/CCNA2/LIG1/PSMA7/PSMD8/PSMA3/PSMA5/MCM6/FEN1/PSMA1/RPA3/PCNA/PSMB1…
REACTOME_INFLUENZA_INFECTION	REACTOME_INFLUENZA_INFECTION	157	0.633241	2.36416	0.0011919	0.0449944	0.0333012	8876	tags=67%, list=25%, signal=51%	RPS4Y2/RPL8/RPL10L/RPL35/RPL36A/RPL13/RPL39L/RPS27/RPL38/RPL36/RPL28/RPL14/RPL37/RPL22L1/RPS21/HSPA1A/RPS15/RPLP2/RPS20/RPSA/RPL18/RPS19/POLR2J/RPS2/RPL37A/RPS28/RPL32/RPL12/RPL18A/RPL39/RPL29/RPL24/RPL7/CLTA/POLR2I/RPL30/RPS24/RPLP1/RPL27A/RPL23A/RPS10/RPS6/RPS18/RPS16/RPL35A/RPS14/RPL23/RPL19/POLR2H/RPS11/RPL7A/RPL27/RPS9/RPS8/RPS3/UBA52/RPL26/RPS5/RPL31/POLR2K/RPS26/RPS7/RPS17/POLR2L/RPL34/RPL…
REACTOME_MITOTIC_G1_PHASE_AND_G1_S_TRANSITION	REACTOME_MITOTIC_G1_PHASE_AND_G1_S_TRANSITION	149	0.455821	1.69579	0.00121507	0.0449944	0.0333012	10395	tags=49%, list=29%, signal=35%	MYBL2/CDKN1C/PSMD4/CDT1/ORC6/PSMB4/CDKN2A/CDC25A/CKS1B/CDC45/PSMB3/CDK1/CCNB1/E2F2/SEM1/TK1/MCM10/UBA52/CDC6/LIN37/PSMB6/CDKN2D/PSMB9/MCM5/RPS27A/MCM7/PSMB8/PSME2/PSMB1/PPP2R1A/CCNA1/E2F1/PSMD13/ORC1/PSMB7/PSMC4/PPP2R3B/POLE4/MCM2/PSMC5/E2F5/PSMC3/E2F4/PSMD14/SRC/POLA2/LIN9/GMNN/MCM4/CDKN2C/POLE2/RPA4/CDK7/TOP2A/PSMA4/PSMB2/PSMB5/CDC7/CCNA2/HDAC1/PSMA7/PSMD8/PSMA3/RBL1/PSMA5/MCM6/PSMA1/RPA3/PCNA/…
REACTOME_CHROMOSOME_MAINTENANCE	REACTOME_CHROMOSOME_MAINTENANCE	140	0.473794	1.7539	0.00121212	0.0449944	0.0333012	10186	tags=55%, list=28%, signal=40%	CENPM/H2AC20/CENPW/H2BC10/HJURP/H2AC18/CENPA/H2BC9/POLR2J/H2AX/H3-4/H2BU1/PIF1/H2AC14/CENPL/POLR2I/H2AB1/DSCC1/BLM/H4C13/H4C11/WRAP53/POLR2H/CHTF18/RUVBL2/H4C2/H2AC4/CENPH/POLR2K/ACD/H4C5/RFC4/POLR2L/H2AJ/H4C4/NOP10/H2AC7/CENPX/ITGB3BP/CENPO/H2AC19/POLD1/CCNA1/RUVBL1/GAR1/NHP2/CENPS/POLR2G/H4C14/POLR2F/DNA2/CENPT/H4C15/H2AZ1/POLA2/OIP5/RFC2/NPM1/H4C1/H4C6/H2BC3/DAXX/TERT/CENPU/H2BC14/H2BC17/POLD2…
REACTOME_RHO_GTPASES_ACTIVATE_FORMINS	REACTOME_RHO_GTPASES_ACTIVATE_FORMINS	140	0.480246	1.77779	0.00121212	0.0449944	0.0333012	9318	tags=49%, list=26%, signal=37%	TUBA3E/TUBA3C/TUBB8/CENPM/AURKB/NUF2/CDC20/TUBAL3/SKA1/KIF2C/TUBA4B/PMF1/BIRC5/CENPA/SPC24/RPS27/PLK1/SPC25/TUBA4A/TUBB8B/NDC80/CENPL/TUBB4B/CENPF/NUDC/SGO2/DYNLL1/CENPH/RHOD/BUB1B/TUBA3D/SGO1/CDCA8/PFN1/TUBB4A/RANGAP1/ITGB3BP/CENPO/PPP2R1A/ERCC6L/TUBA1C/RCC2/ACTB/CENPS/TUBB2B/ZWINT/BUB1/KIF18A/CENPT/TUBA1A/SRC/KNTC1/CENPE/PFN2/RAC1/MAD2L1/DVL2/B9D2/SPDL1/NSL1/SRF/CENPU/TUBB2A/NUP43/DYNC1LI1/RHOC…
REACTOME_RHO_GTPASE_CYCLE	REACTOME_RHO_GTPASE_CYCLE	139	-0.366233	-1.57072	0.00558659	0.0495706	0.0366881	6949	tags=37%, list=19%, signal=30%	ARHGAP27/ITSN1/ARHGAP44/ARHGAP35/ARHGEF15/PREX1/NET1/ARHGEF37/SRGAP1/ARHGAP31/INPP5B/CHN2/ARHGEF9/ARHGAP26/TRIO/SYDE2/ARHGEF17/STARD8/SOS1/ARHGEF10/RHOB/STARD13/ARHGAP6/RASGRF2/ARHGEF18/ARHGEF6/ARHGAP5/AKAP13/ARHGAP32/ABR/FAM13B/ARHGAP21/DEPDC7/SOS2/ARAP2/ARHGAP29/ARHGEF38/OPHN1/KALRN/ARHGEF12/ARHGEF26/ARHGAP24/MYO9A/DLC1/TAGAP/TIAM1/ARHGAP42/FGD4/FAM13A/ARHGAP20/ARHGAP36
REACTOME_FCERI_MEDIATED_NF_KB_ACTIVATION	REACTOME_FCERI_MEDIATED_NF_KB_ACTIVATION	136	-0.516399	-2.22518	0.00549451	0.0494798	0.0366209	5875	tags=40%, list=16%, signal=33%	IGKV2D-40/IGKV1D-12/TRAF6/FBXW11/PSMC1/RASGRP2/IGKV1-39/NFKB1/IGLV7-43/TAB2/TAB3/IGHV1-69/PDPK1/IGKV2D-30/IGLV6-57/IGLV1-44/IGLV2-8/IGKV2-28/RASGRP1/IGKV1-12/FCER1A/IGHV1-2/IGKV1D-16/IGHV3-13/IGLV1-47/IGKV3D-20/IGKV2-30/IGKV1D-39/IGHV2-70/IGLV1-40/IGKV1D-33/IGLV1-51/IGKV1-16/IGHV2-5/IGHV3-11/IGKV1-33/IGHV4-34/IGLV3-1/IGKV4-1/IGLV3-21/IGKV1-17/IGHV4-59/IGHV3-7/IGLV2-11/IGHV3-30/IGHV3-23/IGLV3-25/I…
WP_ANGIOPOIETIN_LIKE_PROTEIN_8_REGULATORY_PATHWAY	WP_ANGIOPOIETIN_LIKE_PROTEIN_8_REGULATORY_PATHWAY	132	-0.366271	-1.57082	0.00555556	0.0494798	0.0366209	8467	tags=46%, list=24%, signal=35%	MAPK8/CBLB/GSK3B/RPS6KB1/SLC2A4/MAP3K13/THRA/AKT1/FASN/MAPK1/SCD/RAPGEF1/CBL/INSR/EIF4E/PIK3CB/RICTOR/MAP4K5/MAP3K1/MAPK6/MAP3K3/PIK3C3/MAP2K1/MAP3K2/PRKAA1/THRB/MAP3K14/LPL/IRS2/SLCO1C1/MAP4K3/EXOC7/MAP2K6/SOS1/PIK3CA/RPS6KA6/PDPK1/MTOR/MAPK4/CYP7A1/RPS6KA5/IRS1/SOS2/PIK3R4/PIK3C2A/ABCG5/PIK3C2G/FOXO1/SESN3/MAP3K5/RPS6KA2/G6PC/ABCG8/PIK3R1/PRKAG2/PCK1/FBP1/PIK3CG/SLC16A2/CYP3A4/CYP2B6
WP_TGFBETA_SIGNALING_PATHWAY	WP_TGFBETA_SIGNALING_PATHWAY	132	-0.428	-1.83555	0.00555556	0.0494798	0.0366209	8467	tags=45%, list=24%, signal=35%	MAPK8/WWP1/ITGB4/SMAD3/PRKAR2A/CAV1/SMURF2/AKT1/SMAD4/SIN3A/MAPK1/SP1/SNIP1/SKI/RUNX2/PIAS1/COL1A2/MAP2K1/ZFYVE16/SMURF1/TRAF6/NUP153/MEF2C/SMAD7/ZFYVE9/APP/CREBBP/FN1/MAP2K6/KLF6/ITGA2/TNC/SOS1/SPTBN1/PPM1A/CCND1/YAP1/RNF111/EP300/MAPK4/ZEB1/KLF11/MET/ITCH/KLF10/ZEB2/ROCK1/MEF2A/ETS1/TGFBR2/ITGB1/TGFBR3/PIK3R1/SIK1/ITGB3/THBS1/RBL2/FOS/FOXP3/FOSB
KEGG_CELL_ADHESION_MOLECULES_CAMS	KEGG_CELL_ADHESION_MOLECULES_CAMS	130	-0.397582	-1.70051	0.00552486	0.0494798	0.0366209	5579	tags=42%, list=16%, signal=36%	GLG1/CLDN2/CNTNAP2/NLGN3/ITGAV/CLDN6/CD34/PECAM1/ALCAM/NEGR1/ITGA6/CLDN14/ITGB8/SPN/NLGN4X/CLDN1/CADM1/JAM2/ICOSLG/ITGA8/NCAM1/PTPRF/CD4/CDH2/CD28/CD40LG/PTPRM/MAG/NFASC/NEO1/ICAM3/NCAM2/NLGN1/CADM3/CLDN19/CDH5/VCAN/ITGB7/NECTIN3/ITGB1/CLDN20/ITGA9/CDH1/PTPRC/OCLN/CD226/NRXN1/CLDN10/VCAM1/NRXN3/SELP/ITGA4/CLDN16/CNTN1/SELE
REACTOME_DNA_REPLICATION	REACTOME_DNA_REPLICATION	128	0.552058	2.02223	0.001221	0.0449944	0.0333012	10391	tags=53%, list=29%, signal=38%	UBE2C/UBE2S/PSMD4/CDT1/ORC6/PSMB4/CDC45/PSMB3/E2F2/ANAPC11/SEM1/MCM10/UBA52/CDC6/RBX1/PSMB6/RFC4/ANAPC7/PSMB9/GINS2/GINS1/MCM5/RPS27A/MCM7/PSMB8/PSME2/PSMB1/POLD1/CCNA1/E2F1/PSMD13/ORC1/PSMB7/PSMC4/POLE4/MCM2/PSMC5/DNA2/PSMC3/PSMD14/POLA2/GMNN/MCM4/RFC2/POLE2/RPA4/PSMA4/CDC16/PSMB2/UBE2E1/PSMB5/POLD2/CDC7/CCNA2/LIG1/PSMA7/PSMD8/PSMA3/PSMA5/MCM6/FEN1/PSMA1/RPA3/PCNA/PSMB11/PSMA2/MCM3/DBF4
REACTOME_RUNX1_REGULATES_TRANSCRIPTION_OF_GENES_INVOLVED_IN_DIFFERENTIATION_OF_HSCS	REACTOME_RUNX1_REGULATES_TRANSCRIPTION_OF_GENES_INVOLVED_IN_DIFFERENTIATION_OF_HSCS	128	0.441438	1.61702	0.003663	0.0449944	0.0333012	10262	tags=49%, list=29%, signal=35%	LMO1/H3C7/H2AC20/H2BC10/H3C11/H3C14/H3C4/PSMD4/H2AC18/PSMB4/H2BC9/H2AX/PSMB3/H2BU1/H2AC14/H2AB1/SEM1/H4C13/H4C11/H4C2/UBA52/H2AC4/H4C5/PSMB6/H2AJ/H4C4/PSMB9/H2AC7/RPS27A/PSMB8/PSME2/PSMB1/H2AC19/TCF3/PSMD13/PSMB7/PSMC4/H4C14/SPI1/PSMC5/H4C15/PSMC3/PSMD14/H2AZ1/H4C1/H4C6/H2BC3/CDK7/PSMA4/PSMB2/PSMB5/H2BC14/H2BC17/H2BC11/H2AC8/PSMA7/PSMD8/PSMA3/PSMA5/H3-3A/PSMA1/PSMB11/PSMA2
KEGG_SPLICEOSOME	KEGG_SPLICEOSOME	127	0.451715	1.64955	0.00246609	0.0449944	0.0333012	11016	tags=46%, list=31%, signal=32%	SNRPD2/SNRPE/HSPA6/LSM7/SNRPF/SF3B4/HSPA1A/SNRPB/HSPA1B/SNRPA/LSM4/PQBP1/PUF60/CCDC12/SF3A2/SNRPD1/SF3B5/PPIH/ALYREF/SNU13/SNRPC/ISY1/SNRPG/TXNL4A/LSM2/MAGOHB/SNRPA1/PRPF31/RBM8A/PRPF3/PRPF6/MAGOH/SART1/SNRNP70/CWC15/THOC1/BUD31/SNRPD3/SNRPB2/PHF5A/THOC3/LSM5/PPIE/XAB2/SF3B6/LSM3/PRPF19/NCBP2/PPIL1/LSM8/LSM6/CTNNBL1/SRSF1/SRSF3/SRSF7/RBM17/SRSF2/SYF2
REACTOME_RESOLUTION_OF_SISTER_CHROMATID_COHESION	REACTOME_RESOLUTION_OF_SISTER_CHROMATID_COHESION	126	0.494931	1.80513	0.00123305	0.0449944	0.0333012	8893	tags=48%, list=25%, signal=37%	TUBA3E/TUBA3C/TUBB8/CENPM/AURKB/NUF2/CDC20/TUBAL3/SKA1/KIF2C/TUBA4B/PMF1/BIRC5/CENPA/SPC24/RPS27/PLK1/SPC25/TUBA4A/TUBB8B/CDK1/CCNB1/NDC80/CENPL/TUBB4B/CENPF/NUDC/CCNB2/SGO2/CDCA5/DYNLL1/CENPH/BUB1B/TUBA3D/SGO1/CDCA8/TUBB4A/RANGAP1/ITGB3BP/CENPO/PPP2R1A/ERCC6L/TUBA1C/RCC2/CENPS/TUBB2B/ZWINT/BUB1/KIF18A/CENPT/TUBA1A/KNTC1/CENPE/MAD2L1/B9D2/SPDL1/NSL1/CENPU/TUBB2A/NUP43/DYNC1LI1
REACTOME_GLYCOSAMINOGLYCAN_METABOLISM	REACTOME_GLYCOSAMINOGLYCAN_METABOLISM	124	-0.424746	-1.80698	0.00512821	0.0480113	0.035534	5327	tags=31%, list=15%, signal=27%	B4GALT5/CSGALNACT2/GPC4/IDS/ST3GAL6/PRELP/GPC5/NDST1/CHP1/HS3ST3A1/B3GNT2/ST3GAL1/HAS1/DSE/CHSY3/SLC26A1/B3GAT2/XYLT1/NCAN/B3GNT7/PAPSS2/HS3ST1/HS6ST3/VCAN/LUM/HS3ST2/UST/LYVE1/CHST9/CSGALNACT1/HSPG2/DCN/DSEL/OMD/OGN/B3GAT1/STAB2/CHST5/NDST3
WP_HIPPOMERLIN_SIGNALING_DYSREGULATION	WP_HIPPOMERLIN_SIGNALING_DYSREGULATION	121	-0.383647	-1.63983	0.00471698	0.0465435	0.0344477	7113	tags=45%, list=20%, signal=37%	LATS1/ITGA7/EPHA2/INSR/PRKAR1A/DCAF1/KRAS/ITGA6/PLCB4/CTNNB1/ITGB8/CDH20/PPP1R12A/FGFR2/PDGFRB/AJUBA/CDH6/CXCL10/FLT4/FLT3/AMOT/ITGA8/ITGA10/ITGA1/ITGA2/CDH2/CDH12/CCN2/SAV1/CCND1/FLT1/CDH16/CDH13/MET/LATS2/NGFR/VGLL4/CDH11/CDH5/TEAD1/PAK5/EGFR/CDH19/ITGB7/ITGB1/ITGA9/CDH1/KIT/CDH17/ITGAD/KDR/ITGB3/ITGA4/NTRK2/TEK
REACTOME_EUKARYOTIC_TRANSLATION_INITIATION	REACTOME_EUKARYOTIC_TRANSLATION_INITIATION	120	0.666077	2.39762	0.00126103	0.0449944	0.0333012	8104	tags=75%, list=23%, signal=58%	RPS4Y2/RPL8/RPL10L/EIF4EBP1/RPL35/RPL36A/RPL13/RPL39L/RPS27/RPL38/RPL36/RPL28/RPL14/RPL37/RPL22L1/RPS21/RPS15/RPLP2/RPS20/RPSA/RPL18/RPS19/RPS2/RPL37A/RPS28/RPL32/RPL12/RPL18A/RPL39/RPL29/RPL24/RPL7/RPL30/RPS24/RPLP1/RPL27A/RPL23A/RPS10/RPS6/RPS18/RPS16/RPL35A/RPS14/RPL23/RPL19/RPS11/RPL7A/RPL27/EIF3B/RPS9/RPS8/RPS3/UBA52/RPL26/RPS5/RPL31/RPS26/RPS7/RPS17/RPL34/RPL6/RPL3L/FAU/RPS12/RPL11/RPL13A/R…
KEGG_OXIDATIVE_PHOSPHORYLATION	KEGG_OXIDATIVE_PHOSPHORYLATION	118	0.593277	2.13089	0.00125628	0.0449944	0.0333012	7873	tags=56%, list=22%, signal=44%	ATP6V1G3/ATP4A/ATP6V0D2/COX8C/NDUFA4L2/ATP6V1B1/COX7B2/COX7A1/COX6C/COX6B1/NDUFB9/NDUFA3/ATP5MC1/NDUFA7/NDUFB7/NDUFS6/CYC1/ATP5MC1P5/ATP5MF/NDUFA11/ATP5ME/ATP5F1D/ATP6V0A4/COX4I1/NDUFS5/NDUFA2/NDUFA1/UQCRB/COX4I2/NDUFS8/ATP6V0B/ATP5F1E/UQCRQ/COX5B/UQCRH/ATP6V1F/ATP5MC2/NDUFB8/NDUFA8/TCIRG1/COX17/UQCR10/ATP6V1C2/ATP6V0E1/NDUFV2/NDUFB3/NDUFA6/COX6A1/ATP12A/COX7B/UQCR11/COX8A/ATP5PD/UQCRHL/NDUFB4/ND…
REACTOME_SELENOAMINO_ACID_METABOLISM	REACTOME_SELENOAMINO_ACID_METABOLISM	118	0.629696	2.2617	0.00125628	0.0449944	0.0333012	8876	tags=73%, list=25%, signal=55%	RPS4Y2/RPL8/RPL10L/RPL35/RPL36A/RPL13/RPL39L/RPS27/RPL38/RPL36/RPL28/RPL14/RPL37/RPL22L1/RPS21/RPS15/RPLP2/RPS20/RPSA/RPL18/RPS19/RPS2/RPL37A/RPS28/RPL32/RPL12/RPL18A/EEF1E1/RPL39/RPL29/RPL24/RPL7/RPL30/RPS24/RPLP1/RPL27A/RPL23A/RPS10/RPS6/RPS18/RPS16/RPL35A/RPS14/RPL23/RPL19/RPS11/RPL7A/RPL27/RPS9/RPS8/RPS3/UBA52/RPL26/RPS5/RPL31/RPS26/RPS7/RPS17/RPL34/RPL6/RPL3L/FAU/RPS12/RPL11/RPL13A/RPS27A/RP…
REACTOME_REGULATION_OF_LIPID_METABOLISM_BY_PPARALPHA	REACTOME_REGULATION_OF_LIPID_METABOLISM_BY_PPARALPHA	118	-0.362912	-1.53121	0.00485437	0.0466705	0.0345416	7717	tags=38%, list=22%, signal=30%	SULT2A1/FAM120B/SIN3A/THRAP3/SP1/NCOA2/FHL2/NR1H4/ALAS1/ANGPTL4/FADS1/MED1/HMGCR/CD36/NCOA1/ARNTL/HELZ2/MED23/TBL1X/CREBBP/APOA5/AHR/PEX11A/MED14/PPARGC1A/EP300/MED13L/CYP7A1/CYP1A1/ABCA1/CLOCK/NCOR1/PPARA/HMGCS1/MED13/CHD9/CPT2/RORA/HMGCS2/ABCB4/ACSL1/CPT1A/CYP4A11/ACOX1/ACADM
REACTOME_NONSENSE_MEDIATED_DECAY_NMD_	REACTOME_NONSENSE_MEDIATED_DECAY_NMD_	116	0.662456	2.37355	0.00125156	0.0449944	0.0333012	8876	tags=78%, list=25%, signal=59%	RPS4Y2/RPL8/RPL10L/RPL35/RPL36A/RPL13/RPL39L/RPS27/RPL38/RPL36/RPL28/RPL14/RPL37/RPL22L1/RPS21/RPS15/RPLP2/RPS20/RPSA/RPL18/RPS19/RPS2/RPL37A/RPS28/RPL32/RPL12/RPL18A/RPL39/RPL29/RPL24/RPL7/RPL30/RPS24/RPLP1/RPL27A/RPL23A/RPS10/RPS6/RPS18/SMG9/RPS16/RPL35A/RPS14/RPL23/SMG5/RPL19/RPS11/RPL7A/RPL27/RPS9/RPS8/RPS3/UBA52/RPL26/RPS5/RPL31/RPS26/RPS7/RPS17/RPL34/MAGOHB/RPL6/RPL3L/FAU/RPS12/RPL11/RBM8A/…
REACTOME_PARASITE_INFECTION	REACTOME_PARASITE_INFECTION	116	-0.609483	-2.55274	0.00492611	0.0466705	0.0345416	5893	tags=47%, list=16%, signal=40%	CYFIP1/IGKV2D-40/IGHG2/IGKV1D-12/IGHG4/IGKV1-39/MYO5A/CD3G/IGLV7-43/DOCK1/IGHV1-69/WASL/FYN/IGKV2D-30/IGLV6-57/IGLV1-44/IGLV2-8/IGKV2-28/IGKV1-12/IGHV1-2/IGKV1D-16/IGHV3-13/MYO10/IGLV1-47/IGKV3D-20/IGKV2-30/IGKV1D-39/WASF3/IGHV2-70/IGLV1-40/IGKV1D-33/IGLV1-51/IGKV1-16/IGHV2-5/IGHV3-11/CYFIP2/IGKV1-33/IGHV4-34/IGLV3-1/IGKV4-1/IGLV3-21/IGKV1-17/IGHV4-59/IGHV3-7/IGLV2-11/IGHV3-30/IGHV3-23/IGLV3-25/I…
WP_ESC_PLURIPOTENCY_PATHWAYS	WP_ESC_PLURIPOTENCY_PATHWAYS	116	-0.382052	-1.60017	0.00492611	0.0466705	0.0345416	7730	tags=49%, list=22%, signal=39%	BRAF/FGF11/AKT1/SMAD4/MAPK1/WNT3/FGF1/FZD5/ACTR2/FGF12/FZD3/MAPK6/MAP2K1/BMP4/WNT16/CTNNB1/FGFR2/PDGFRB/FZD1/MDM2/FGF16/SMAD7/WNT11/SMAD6/AKT3/MAP2K6/SOS1/HNF1A/PTPN11/LRP5/SMAD9/MTOR/MAPK4/JAK1/FZD4/FZD8/FGF18/IL6ST/BMPR2/APC/GAB1/EGFR/FGF2/LRP6/FGF20/SMAD1/FGF7/WNT5B/BMPR1B/SELENOP/FOS/LIFR/FGF23/WNT2/WNT9B/FGF5/WNT7A
KEGG_PARKINSONS_DISEASE	KEGG_PARKINSONS_DISEASE	115	0.489726	1.75482	0.00125471	0.0449944	0.0333012	9343	tags=54%, list=26%, signal=40%	UCHL1/SLC6A3/COX8C/NDUFA4L2/COX7B2/COX7A1/COX6C/COX6B1/NDUFB9/NDUFA3/ATP5MC1/NDUFA7/NDUFB7/NDUFS6/CYC1/ATP5MC1P5/ATP5F1D/COX4I1/NDUFS5/NDUFA2/SEPTIN5/NDUFA1/UQCRB/COX4I2/NDUFS8/ATP5F1E/UQCRQ/COX5B/UQCRH/ATP5MC2/NDUFB8/NDUFA8/UQCR10/NDUFV2/SLC18A1/NDUFB3/NDUFA6/COX6A1/UBE2J2/COX7B/UQCR11/COX8A/ATP5PD/UQCRHL/NDUFB4/NDUFB10/NDUFB1/COX7A2/UBE2L3/COX5A/COX7C/SLC25A6/NDUFS2/NDUFS7/NDUFC1/NDUFA9/PARK7/U…
REACTOME_COMPLEMENT_CASCADE	REACTOME_COMPLEMENT_CASCADE	114	-0.661559	-2.77141	0.00485437	0.0466705	0.0345416	6043	tags=60%, list=17%, signal=50%	CFHR4/CPN1/IGKV2D-40/IGHG2/ELANE/IGKV1D-12/IGHG4/CPB2/C1R/IGKV1-39/IGLV7-43/CFI/IGHV1-69/CPN2/C4A/C4B/MBL2/IGKV2D-30/C1S/C8B/IGLV6-57/PROS1/IGLV1-44/IGLV2-8/IGKV2-28/IGKV1-12/IGHV1-2/IGKV1D-16/CFP/CR1/IGHV3-13/C8A/IGLV1-47/IGKV3D-20/IGKV2-30/IGKV1D-39/IGHV2-70/IGLV1-40/IGKV1D-33/IGLV1-51/IGKV1-16/MASP1/IGHV2-5/IGHV3-11/IGKV1-33/IGHV4-34/IGLV3-1/IGKV4-1/IGLV3-21/IGKV1-17/IGHV4-59/IGHV3-7/C6/IGLV2-…
REACTOME_SRP_DEPENDENT_COTRANSLATIONAL_PROTEIN_TARGETING_TO_MEMBRANE	REACTOME_SRP_DEPENDENT_COTRANSLATIONAL_PROTEIN_TARGETING_TO_MEMBRANE	113	0.688223	2.46047	0.00125471	0.0449944	0.0333012	8876	tags=80%, list=25%, signal=60%	RPS4Y2/RPL8/RPL10L/SSR2/RPL35/RPL36A/RPL13/RPL39L/RPS27/RPL38/RPL36/RPL28/RPL14/RPL37/RPL22L1/RPS21/RPS15/RPLP2/RPS20/RPSA/RPL18/RPS19/RPS2/RPL37A/RPS28/SEC61G/RPL32/RPL12/RPL18A/RPL39/RPL29/RPL24/RPL7/RPL30/RPS24/RPLP1/RPL27A/SSR4/RPL23A/RPS10/RPS6/RPS18/RPS16/RPL35A/RPS14/RPL23/RPL19/RPS11/RPL7A/RPL27/RPS9/RPS8/RPS3/UBA52/RPL26/RPS5/RPL31/RPS26/RPS7/RPS17/RPL34/SEC61B/RPL6/RPL3L/FAU/RPS12/RPL11…
REACTOME_TELOMERE_MAINTENANCE	REACTOME_TELOMERE_MAINTENANCE	113	0.467007	1.6696	0.00376412	0.0449944	0.0333012	9247	tags=50%, list=26%, signal=38%	H2AC20/H2BC10/H2AC18/H2BC9/POLR2J/H2AX/H3-4/H2BU1/PIF1/H2AC14/POLR2I/H2AB1/DSCC1/BLM/H4C13/H4C11/WRAP53/POLR2H/CHTF18/RUVBL2/H4C2/H2AC4/POLR2K/ACD/H4C5/RFC4/POLR2L/H2AJ/H4C4/NOP10/H2AC7/H2AC19/POLD1/CCNA1/RUVBL1/GAR1/NHP2/POLR2G/H4C14/POLR2F/DNA2/H4C15/H2AZ1/POLA2/RFC2/H4C1/H4C6/H2BC3/DAXX/TERT/H2BC14/H2BC17/POLD2/H2BC11/H2AC8/CCNA2/LIG1
REACTOME_RESPIRATORY_ELECTRON_TRANSPORT_ATP_SYNTHESIS_BY_CHEMIOSMOTIC_COUPLING_AND_HEAT_PRODUCTION_BY_UNCOUPLING_PROTEINS_	REACTOME_RESPIRATORY_ELECTRON_TRANSPORT_ATP_SYNTHESIS_BY_CHEMIOSMOTIC_COUPLING_AND_HEAT_PRODUCTION_BY_UNCOUPLING_PROTEINS_	111	0.533494	1.89964	0.00126422	0.0449944	0.0333012	10970	tags=66%, list=31%, signal=46%	UCP1/NDUFA13/COX6C/COX6B1/NDUFB9/NDUFA3/ATP5MC1/NDUFA7/NDUFB7/NDUFS6/CYC1/ATP5MF/NDUFAF2/NDUFA11/ATP5ME/ATP5F1D/COX4I1/NDUFS5/NDUFA2/NDUFA1/UQCRB/NDUFS8/ATP5F1E/UQCRQ/COX5B/UQCRH/ATP5MC2/NDUFB8/NDUFA8/NDUFAF3/UQCR10/NDUFB11/COX20/ETFB/NDUFV2/NDUFB3/NDUFA6/COX6A1/NDUFAF4/COX7B/NDUFAF6/UQCR11/COX8A/ATP5PD/NDUFB4/NDUFB10/ATP5MG/NDUFB1/COX5A/COX7C/NDUFS2/UCP2/NDUFS7/NDUFC1/NDUFA12/NDUFA9/UCP3/COX14/U…
REACTOME_MITOTIC_SPINDLE_CHECKPOINT	REACTOME_MITOTIC_SPINDLE_CHECKPOINT	111	0.464202	1.65291	0.00379267	0.0449944	0.0333012	8893	tags=44%, list=25%, signal=33%	UBE2C/CENPM/AURKB/UBE2S/NUF2/CDC20/SKA1/KIF2C/PMF1/BIRC5/CENPA/SPC24/RPS27/PLK1/SPC25/NDC80/CENPL/ANAPC11/CENPF/NUDC/SGO2/DYNLL1/CENPH/BUB1B/SGO1/CDCA8/ANAPC7/RANGAP1/ITGB3BP/CENPO/PPP2R1A/ERCC6L/RCC2/CENPS/ZWINT/BUB1/KIF18A/CENPT/KNTC1/CENPE/MAD2L1/B9D2/SPDL1/CDC16/NSL1/CENPU/UBE2E1/NUP43/DYNC1LI1
REACTOME_NEGATIVE_REGULATION_OF_THE_PI3K_AKT_NETWORK	REACTOME_NEGATIVE_REGULATION_OF_THE_PI3K_AKT_NETWORK	110	-0.405688	-1.69617	0.00471698	0.0465435	0.0344477	5754	tags=45%, list=16%, signal=38%	AKT1/MAPK1/FGF1/PPP2R5E/INSR/IL33/PIP5K1B/PIK3CB/ESR2/PPP2CB/TRAF6/PHLPP2/FGFR2/PDGFRB/FGF16/IRS2/STRN/MYD88/PPP2R1B/IL1RAP/AKT3/CD28/PIK3CA/PTPN11/FYN/FRS2/PHLPP1/NRG3/IRS1/AREG/MET/FGF18/EREG/GAB1/EGFR/FGF2/TRAT1/FGF20/TGFA/ERBB2/PIK3R1/KIT/FGF7/NRG1/FGF23/KL/FGF5/ESR1/IL1RL1
REACTOME_O_LINKED_GLYCOSYLATION	REACTOME_O_LINKED_GLYCOSYLATION	110	-0.496752	-2.07691	0.00471698	0.0465435	0.0344477	6891	tags=46%, list=19%, signal=38%	ADAMTS4/ADAMTS18/ADAMTS8/B4GAT1/ADAMTSL4/GCNT7/MUCL1/GALNT1/ADAMTS15/GALNT11/B4GALT5/B3GALNT2/ADAMTSL1/ADAMTS2/GCNT4/THSD1/MUC21/MUC6/ADAMTS12/ST6GALNAC3/B3GNT2/MUC16/LARGE1/ST3GAL1/GALNT16/ADAMTSL2/ADAMTS1/B3GNT7/GALNT5/CFP/MUC5B/POMK/THSD7A/GALNT7/GALNT12/MUC3A/GALNT3/THBS2/SEMA5A/GALNT17/SPON1/THBS1/ADAMTSL3/MUC5AC/GALNT15/THSD7B/THSD4/GALNT4/ADAMTS16/CHST4/GALNTL6
KEGG_T_CELL_RECEPTOR_SIGNALING_PATHWAY	KEGG_T_CELL_RECEPTOR_SIGNALING_PATHWAY	108	-0.358386	-1.49488	0.0047619	0.0466	0.0344895	8861	tags=43%, list=25%, signal=32%	ICOS/PIK3R3/PLCG1/PIK3R5/CHUK/CBLB/GSK3B/LCP2/AKT1/NFATC2/MAPK1/CBL/PPP3CA/PRKCQ/PIK3CB/KRAS/NCK1/MAP2K1/DLG1/TNF/GRAP2/MAP3K14/TEC/CD3G/NFKB1/CD4/AKT3/SOS1/CHP1/CD28/PIK3CA/PDPK1/FYN/CD40LG/IL10/NFATC3/SOS2/RASGRP1/PAK5/ITK/PIK3R1/PTPRC/PIK3CG/NFAT5/FOS/CHP2
REACTOME_PHASE_II_CONJUGATION_OF_COMPOUNDS	REACTOME_PHASE_II_CONJUGATION_OF_COMPOUNDS	107	-0.457293	-1.91012	0.00471698	0.0465435	0.0344477	4381	tags=31%, list=12%, signal=27%	SULT1C4/MAT1A/ACSM2B/SULT4A1/UGP2/GSTA5/GSTT2B/SLC26A1/PAPSS2/AS3MT/NAT1/UGT2B15/UGT2B7/SLC35D1/UGT1A1/GSTZ1/ACSM2A/UGT2B10/SULT1E1/UGT2A3/ACSM5/UGT1A4/GSTA2/GLYAT/GLYATL1/UGT1A3/SULT1B1/GSTM5/GSTM1/UGT2B17/GLYATL3/NAT2/CYP1A2
REACTOME_RESPONSE_OF_EIF2AK4_GCN2_TO_AMINO_ACID_DEFICIENCY	REACTOME_RESPONSE_OF_EIF2AK4_GCN2_TO_AMINO_ACID_DEFICIENCY	102	0.705339	2.49366	0.00126582	0.0449944	0.0333012	7244	tags=78%, list=20%, signal=63%	RPS4Y2/RPL8/RPL10L/RPL35/RPL36A/RPL13/RPL39L/DDIT3/RPS27/TRIB3/RPL38/RPL36/RPL28/RPL14/RPL37/RPL22L1/RPS21/RPS15/RPLP2/RPS20/RPSA/RPL18/RPS19/RPS2/RPL37A/RPS28/RPL32/RPL12/RPL18A/RPL39/RPL29/RPL24/RPL7/RPL30/RPS24/RPLP1/RPL27A/RPL23A/RPS10/RPS6/RPS18/RPS16/RPL35A/RPS14/RPL23/ATF4/RPL19/RPS11/RPL7A/RPL27/RPS9/RPS8/RPS3/UBA52/RPL26/RPS5/RPL31/RPS26/RPS7/ASNS/RPS17/RPL34/RPL6/RPL3L/FAU/RPS12/RPL11/R…
REACTOME_PHASE_I_FUNCTIONALIZATION_OF_COMPOUNDS	REACTOME_PHASE_I_FUNCTIONALIZATION_OF_COMPOUNDS	102	-0.600908	-2.46632	0.00471698	0.0465435	0.0344477	5363	tags=53%, list=15%, signal=45%	NCOA1/CYP46A1/CYP11B1/FMO1/CYP4F12/CES3/AHR/MAOA/AOC3/CYP7B1/FMO3/ALDH2/ALDH1B1/CYP4F8/CYP7A1/AADAC/MAOB/CYP1A1/CYP11A1/CMBL/CYP2J2/CYP1B1/CYP2U1/ADH1C/CYP2E1/ADH6/CYP2C18/CYP4F3/ADH1A/CYP4A11/CYP39A1/CYP2C9/CYP51A1/CYP4B1/CYP4F2/CYP3A43/CYP4V2/CYP8B1/CYP4A22/CYP2C19/CYP2C8/ADH4/ADH7/FMO2/CYP3A4/AOC1/CYP2A6/ADH1B/CYP2B6/PTGIS/CYP26A1/CYP1A2/CYP2A7/CYP2A13
REACTOME_PI3K_AKT_SIGNALING_IN_CANCER	REACTOME_PI3K_AKT_SIGNALING_IN_CANCER	102	-0.443078	-1.81854	0.00471698	0.0465435	0.0344477	5405	tags=36%, list=15%, signal=31%	FGFR2/PDGFRB/MDM2/FGF16/IRS2/STRN/AKT3/CD28/PIK3CA/PTPN11/PDPK1/FYN/MTOR/FRS2/NRG3/IRS1/AREG/MET/FGF18/EREG/GAB1/FOXO1/EGFR/NR4A1/FGF2/TRAT1/FGF20/TGFA/ERBB2/PIK3R1/KIT/FGF7/NRG1/FGF23/KL/FGF5/ESR1
REACTOME_SIGNALING_BY_TGFB_FAMILY_MEMBERS	REACTOME_SIGNALING_BY_TGFB_FAMILY_MEMBERS	102	-0.393954	-1.61692	0.00471698	0.0465435	0.0344477	8437	tags=40%, list=24%, signal=31%	UBE2D3/ACVR1B/SMAD3/ACVR2A/CGN/SMURF2/SMAD4/USP15/CCNT2/SP1/CBL/SKI/BMP2/CCNT1/PRKCZ/ZFYVE16/SMURF1/TRIM33/SMAD7/ZFYVE9/MTMR4/GREM2/SMAD6/PPM1A/ARHGEF18/SMAD9/RNF111/AMHR2/USP9X/NCOR1/BMPR2/CCNK/PMEPA1/TGFBR2/ACVR1C/CHRDL1/SMAD1/BMPR1B/INHBA/BMP10/GDF2
REACTOME_UCH_PROTEINASES	REACTOME_UCH_PROTEINASES	101	0.474357	1.67328	0.00508906	0.0478331	0.0354021	10262	tags=52%, list=29%, signal=38%	UCHL1/H2AC20/H2AC12/PSMD4/H2AC18/PSMB4/H2AW/PSMB3/H2AC14/H2AC21/SEM1/TFPT/UCHL3/UBA52/H2AC4/PSMB6/PSMB9/ACTR5/H2AC7/RPS27A/INO80B/ADRM1/MCRS1/PSMB8/PSME2/PSMB1/H2AC19/RUVBL1/PSMD13/ACTB/PSMB7/PSMC4/NEDD8/INO80C/PSMC5/PSMC3/PSMD14/H2AC17/FOXK2/PSMA4/INO80E/PSMB2/PSMB5/H2AC8/UCHL5/PSMA7/PSMD8/PSMA3/FOXK1/PSMA5/PSMA1/PSMB11/PSMA2
PID_CXCR4_PATHWAY	PID_CXCR4_PATHWAY	100	-0.407905	-1.6726	0.0046729	0.0465435	0.0344477	8746	tags=47%, list=24%, signal=36%	PIK3R3/GNAI3/PIK3R5/STAT1/RALB/PTEN/ITGA11/YES1/AKT1/GNA13/ITGAV/STAT2/ITGA7/GNG2/RAP1B/PIK3CB/RICTOR/ITGA6/PRKCZ/STAT5B/SSH1/ITGA8/CD3G/VPS4B/ITGA10/CD4/ITGA1/ITGA2/RHOB/JAK2/PIK3CA/PTPN11/PDPK1/FYN/MTOR/PTK2B/ITCH/FOXO1/ITGB1/ITGA9/PIK3R1/CXCL12/PTPRC/PIK3CG/ITGA4/BLK/GNAO1
REACTOME_SLC_TRANSPORTER_DISORDERS	REACTOME_SLC_TRANSPORTER_DISORDERS	99	-0.385108	-1.56362	0.00485437	0.0466705	0.0345416	6202	tags=36%, list=17%, signal=30%	SLC7A9/RANBP2/NUP54/SLCO1B3/AVPR2/NUP160/SLC2A10/NUP153/GCKR/HEPH/SLC24A4/POM121/SLC16A1/SLC40A1/SLC35A3/SLC12A6/SLC2A9/SLC17A8/SLC5A2/SLC34A1/CP/SLC6A2/SLC24A1/SLCO2A1/SLC1A1/AVPR1A/SLC2A2/SLC12A1/SLCO1B1/SLC34A2/SLC6A20/SLC4A4/RHAG/SLC4A1/SLC3A1/SLC5A1
REACTOME_BINDING_AND_UPTAKE_OF_LIGANDS_BY_SCAVENGER_RECEPTORS	REACTOME_BINDING_AND_UPTAKE_OF_LIGANDS_BY_SCAVENGER_RECEPTORS	98	-0.697646	-2.83733	0.00473934	0.0465708	0.0344679	4919	tags=59%, list=14%, signal=51%	IGKV1-39/COL4A2/SCARF1/COL1A1/IGLV7-43/IGHV1-69/HPX/IGKV2D-30/IGLV6-57/COL4A1/IGLV1-44/IGLV2-8/IGKV2-28/IGKV1-12/APOB/ALB/IGHV1-2/IGKV1D-16/COL3A1/IGHV3-13/IGLV1-47/IGKV3D-20/IGKV2-30/IGHA2/SSC5D/IGKV1D-39/IGHV2-70/IGLV1-40/IGHA1/IGKV1D-33/IGLV1-51/IGKV1-16/MASP1/IGHV2-5/IGHV3-11/IGKV1-33/IGHV4-34/IGLV3-1/JCHAIN/IGKV4-1/IGLV3-21/IGKV1-17/IGHV4-59/IGHV3-7/IGLV2-11/IGHV3-30/IGHV3-23/MARCO/IGLV3-25/…
WP_B_CELL_RECEPTOR_SIGNALING_PATHWAY	WP_B_CELL_RECEPTOR_SIGNALING_PATHWAY	97	-0.405261	-1.64702	0.00465116	0.0465435	0.0344477	10475	tags=54%, list=29%, signal=38%	GAB2/CD81/MAPK14/LCK/ELK1/ATF2/CR2/PIK3AP1/MALT1/VAV2/CD22/INPP5D/PLCG1/RASGRP3/MAPK8/CHUK/GSK3B/CREB1/BRAF/BLNK/AKT1/NFATC2/MAPK1/RAPGEF1/CBL/PIP5K1B/NCK1/PRKCB/MAP2K1/TEC/MEF2C/NFKB1/MAP2K6/SOS1/DAPP1/PLCG2/PTPN11/PDPK1/FYN/MAPK4/NFATC3/KLF11/GAB1/FOXO1/REL/ETS1/PIK3R1/PTPRC/IRF4/PIK3CG/GTF2I/BLK
WP_HUMAN_COMPLEMENT_SYSTEM	WP_HUMAN_COMPLEMENT_SYSTEM	97	-0.420559	-1.70919	0.00465116	0.0465435	0.0344477	4339	tags=34%, list=12%, signal=30%	CFHR4/CPN1/ELANE/PRKCA/IBSP/C1R/CFI/ITGA2/F12/C4A/MBL2/CD93/C1S/PROS1/CSNK1A1/ALB/CFP/CR1/C8A/KLKB1/MASP1/PLG/SELP/F11/ITGB3/THBS1/C6/SELE/ADIPOQ/DCN/C7/FCN2/CLEC4M
REACTOME_FCGR3A_MEDIATED_IL10_SYNTHESIS	REACTOME_FCGR3A_MEDIATED_IL10_SYNTHESIS	95	-0.667796	-2.71861	0.0045045	0.0465435	0.0344477	4919	tags=54%, list=14%, signal=46%	IGKV1-39/CD3G/IGLV7-43/IGHV1-69/ADCY7/PLCG2/FYN/IGKV2D-30/IGLV6-57/ADCY9/IL10/IGLV1-44/IGLV2-8/IGKV2-28/IGKV1-12/IGHV1-2/IGKV1D-16/IGHV3-13/IGLV1-47/IGKV3D-20/IGKV2-30/ITPR2/ITPR1/IGKV1D-39/IGHV2-70/IGLV1-40/IGKV1D-33/IGLV1-51/IGKV1-16/IGHV2-5/IGHV3-11/IGKV1-33/IGHV4-34/IGLV3-1/IGKV4-1/IGLV3-21/IGKV1-17/IGHV4-59/IGHV3-7/IGLV2-11/ADCY1/IGHV3-30/IGHV3-23/IGLV3-25/IGLV2-14/IGHV4-39/IGHV3-48/IGKV1-5/…
REACTOME_EUKARYOTIC_TRANSLATION_ELONGATION	REACTOME_EUKARYOTIC_TRANSLATION_ELONGATION	94	0.723639	2.53839	0.00128041	0.0449944	0.0333012	8876	tags=91%, list=25%, signal=69%	RPS4Y2/RPL8/RPL10L/RPL35/RPL36A/RPL13/RPL39L/EEF1G/RPS27/RPL38/RPL36/RPL28/RPL14/RPL37/RPL22L1/RPS21/RPS15/RPLP2/RPS20/RPSA/RPL18/RPS19/RPS2/RPL37A/RPS28/RPL32/RPL12/RPL18A/RPL39/RPL29/RPL24/RPL7/RPL30/RPS24/RPLP1/RPL27A/RPL23A/RPS10/RPS6/RPS18/RPS16/RPL35A/EEF1A2/RPS14/RPL23/RPL19/RPS11/RPL7A/RPL27/RPS9/EEF1D/RPS8/RPS3/UBA52/RPL26/RPS5/RPL31/RPS26/RPS7/RPS17/RPL34/RPL6/RPL3L/FAU/RPS12/RPL11/RPL1…
REACTOME_MITOCHONDRIAL_TRANSLATION	REACTOME_MITOCHONDRIAL_TRANSLATION	94	0.528616	1.85429	0.00128041	0.0449944	0.0333012	10668	tags=55%, list=30%, signal=39%	MRPL55/MRPL24/MRPS21/GADD45GIP1/MRPL52/MRPL12/MRPL23/MRPL41/MRPL9/MRPL14/MRPL47/MRPL28/MRPL17/DAP3/MRPS15/CHCHD1/MRPS12/MRPL13/MRPL27/MRPS34/MRPS17/MRPL48/MRPL36/MRPS26/AURKAIP1/MRPL22/MRPL2/MRPL18/MRPS14/MRPS23/MRPL58/MRPL51/MRPL53/MRPL20/MRPL57/MRPS5/MRPS2/MTIF3/MRPS25/MRPL43/MRPL11/MRPS9/MRPS16/MRPL40/MRPL33/MRPL50/MRPL54/ERAL1/MRPL15/MRPS28/MRPL4/MRPS7
WP_CORTICOTROPINRELEASING_HORMONE_SIGNALING_PATHWAY	WP_CORTICOTROPINRELEASING_HORMONE_SIGNALING_PATHWAY	93	-0.382788	-1.5494	0.0044843	0.0465435	0.0344477	7730	tags=41%, list=22%, signal=32%	BRAF/SULT2A1/AKT1/MAPK1/CASP12/SP1/NCOA2/RAP1B/GRK3/PRKCQ/GJA1/GNB5/PRKCB/NOS3/MAP2K1/GNAQ/CTNNB1/ARRB1/ECE1/PRKCA/CYP11B1/NFKB1/ERN1/CACNA1H/PLCG2/TCF4/BCL2/CYP11A1/NR4A1/MAP3K5/HSD3B2/NR4A2/TLR4/FOS/KRT1/GNAO1/FOSB/CRHBP
WP_G_PROTEIN_SIGNALING_PATHWAYS	WP_G_PROTEIN_SIGNALING_PATHWAYS	93	-0.395253	-1.59986	0.0044843	0.0465435	0.0344477	7944	tags=47%, list=22%, signal=37%	PRKACB/GNG7/AKAP10/GNA13/ADCY4/ADCY6/PPP3CA/PRKCQ/PRKAR1A/ADCY3/GNB5/KRAS/GNG12/PRKCZ/PRKCB/KCNJ3/PDE1A/AKAP1/GNAQ/GNG10/PRKCA/PRKD3/PDE4B/PRKD1/ADCY7/AKAP13/PDE8A/ADCY9/PRKCE/PRKCH/AKAP11/AKAP12/AKAP5/ITPR1/AKAP7/PDE7B/GNA14/AKAP6/ADCY1/AKAP3/PDE1C/AKAP9/PALM2AKAP2/GNAO1
REACTOME_SWITCHING_OF_ORIGINS_TO_A_POST_REPLICATIVE_STATE	REACTOME_SWITCHING_OF_ORIGINS_TO_A_POST_REPLICATIVE_STATE	91	0.541524	1.89484	0.00130208	0.0449944	0.0333012	10374	tags=51%, list=29%, signal=36%	UBE2C/UBE2S/PSMD4/CDT1/ORC6/PSMB4/PSMB3/ANAPC11/SEM1/UBA52/CDC6/RBX1/PSMB6/ANAPC7/PSMB9/MCM5/RPS27A/MCM7/PSMB8/PSME2/PSMB1/CCNA1/PSMD13/ORC1/PSMB7/PSMC4/MCM2/PSMC5/PSMC3/PSMD14/MCM4/PSMA4/CDC16/PSMB2/UBE2E1/PSMB5/CCNA2/PSMA7/PSMD8/PSMA3/PSMA5/MCM6/PSMA1/PSMB11/PSMA2/MCM3
WP_AMINO_ACID_METABOLISM	WP_AMINO_ACID_METABOLISM	91	-0.494647	-2.00401	0.0042735	0.0451662	0.0334283	7378	tags=49%, list=21%, signal=39%	ARG2/HIBCH/OGDH/GLUD1/GLUL/DLST/AUH/SDHA/PC/HDC/FTCD/LARS2/HNMT/ACO2/ALDH7A1/CTH/MAOA/GOT2/AOC3/DLD/ARG1/HIBADH/HAL/MCCC1/CBS/TH/TDO2/PPM1L/ASS1/OAT/ACAA1/ADH1C/CPS1/HMGCS2/MMUT/OTC/PCK1/ACADM/TAT/EHHADH/ADH4/ADH7/PDK4/BHMT/DBH
WP_ERBB_SIGNALING_PATHWAY	WP_ERBB_SIGNALING_PATHWAY	91	-0.383168	-1.55236	0.0042735	0.0451662	0.0334283	8746	tags=48%, list=24%, signal=37%	PIK3R3/CDKN1A/PLCG1/MAPK8/ARAF/CBLB/GSK3B/RPS6KB1/BRAF/AKT1/MAPK1/CBL/PIK3CB/KRAS/NCK1/CDKN1B/PRKCB/MAP2K1/STAT5B/PRKCA/CAMK2D/MDM2/AKT3/SOS1/PIK3CA/CCND1/PLCG2/PDPK1/MTOR/BCL2L11/NRG3/AREG/SOS2/EREG/PAK5/GAB1/FOXO1/EGFR/TGFA/ERBB2/SHC4/PIK3R1/CAMK2B/NRG1
WP_ELECTRON_TRANSPORT_CHAIN_OXPHOS_SYSTEM_IN_MITOCHONDRIA	WP_ELECTRON_TRANSPORT_CHAIN_OXPHOS_SYSTEM_IN_MITOCHONDRIA	90	0.577335	2.0107	0.00131406	0.0449944	0.0333012	10970	tags=71%, list=31%, signal=49%	UCP1/COX7A1/COX6C/COX6B1/NDUFB9/NDUFA3/ATP5MC1/NDUFA7/NDUFB7/NDUFS6/ATP5MF/ATP5ME/ATP5F1D/COX4I1/NDUFS5/NDUFA2/NDUFA1/UQCRB/NDUFS8/ATP5F1E/UQCRQ/COX5B/UQCRH/ATP5MC2/NDUFB8/NDUFA8/COX17/UQCR10/NDUFV2/NDUFB3/NDUFA6/COX6A1/COX7B/UQCR11/COX8A/ATP5PD/NDUFB4/NDUFB10/ATP5MG/NDUFB1/ATP5IF1/COX7A2/COX5A/COX7C/SLC25A6/NDUFS2/UCP2/NDUFS7/NDUFC1/NDUFA12/NDUFA9/UCP3/UQCRC1/ATP5PO/NDUFB2/NDUFV3/SLC25A14/NDUFAB…
REACTOME_BASE_EXCISION_REPAIR	REACTOME_BASE_EXCISION_REPAIR	90	0.494138	1.72094	0.00525624	0.0488256	0.0361367	10186	tags=53%, list=28%, signal=38%	H2AC20/H2BC10/H2AC18/H2BC9/H2AX/H3-4/H2BU1/H2AC14/NEIL3/H2AB1/H4C13/H4C11/H4C2/H2AC4/ACD/H4C5/RFC4/H2AJ/H4C4/H2AC7/H2AC19/POLD1/PNKP/SMUG1/NTHL1/H4C14/POLE4/H4C15/H2AZ1/MUTYH/RFC2/OGG1/POLE2/H4C1/H4C6/H2BC3/POLB/PARP1/H2BC14/H2BC17/POLD2/H2BC11/H2AC8/LIG1/XRCC1/FEN1/RPA3/PCNA
REACTOME_RESPIRATORY_ELECTRON_TRANSPORT	REACTOME_RESPIRATORY_ELECTRON_TRANSPORT	89	0.52571	1.83095	0.00131579	0.0449944	0.0333012	10970	tags=66%, list=31%, signal=46%	NDUFA13/COX6C/COX6B1/NDUFB9/NDUFA3/NDUFA7/NDUFB7/NDUFS6/CYC1/NDUFAF2/NDUFA11/COX4I1/NDUFS5/NDUFA2/NDUFA1/UQCRB/NDUFS8/UQCRQ/COX5B/UQCRH/NDUFB8/NDUFA8/NDUFAF3/UQCR10/NDUFB11/COX20/ETFB/NDUFV2/NDUFB3/NDUFA6/COX6A1/NDUFAF4/COX7B/NDUFAF6/UQCR11/COX8A/NDUFB4/NDUFB10/NDUFB1/COX5A/COX7C/NDUFS2/NDUFS7/NDUFC1/NDUFA12/NDUFA9/COX14/UQCRC1/NDUFB2/NDUFV3/CYCS/NDUFAB1/NDUFS4/NDUFB6/NDUFS3/SURF1/NDUFA4/TIMMDC1/…
KEGG_RIBOSOME	KEGG_RIBOSOME	88	0.726851	2.52422	0.00132275	0.0449944	0.0333012	8876	tags=92%, list=25%, signal=69%	RPL8/RPL10L/RPL35/RPL36A/RPL13/RPS27/RPL38/RPL36/RPL28/RPL14/RPL37/RPL22L1/RPS21/RPS15/RPLP2/RPS20/RPSA/RPL18/RPS19/RPS2/RPL37A/RPS28/RPL32/RPL12/RPL18A/RPL39/RPL29/RPL24/RPL7/RPL30/RPS24/RPLP1/RPL27A/RPL23A/RPS10/RPS6/RPS18/RPS16/RPL35A/RPL23/RPL19/RPS11/RPL7A/RPL27/RPS9/RPS8/RPS3/UBA52/RPL26/RPS5/RPL31/RPS26/RPS7/MRPL13/RPS17/RPL34/RPL6/RPL3L/FAU/RPS12/RPL11/RPL13A/RPS27A/RPL9/RSL24D1P11/RPL21/…
REACTOME_APC_C_MEDIATED_DEGRADATION_OF_CELL_CYCLE_PROTEINS	REACTOME_APC_C_MEDIATED_DEGRADATION_OF_CELL_CYCLE_PROTEINS	88	0.541941	1.88206	0.00132275	0.0449944	0.0333012	10262	tags=51%, list=29%, signal=37%	UBE2C/AURKB/UBE2S/CDC20/PTTG1/PSMD4/PSMB4/PLK1/PSMB3/CDK1/CCNB1/NEK2/ANAPC11/SEM1/UBA52/BUB1B/PSMB6/ANAPC7/PSMB9/AURKA/RPS27A/PSMB8/PSME2/PSMB1/CCNA1/PSMD13/PSMB7/PSMC4/PSMC5/PSMC3/PSMD14/MAD2L1/PSMA4/CDC16/PSMB2/UBE2E1/PSMB5/CCNA2/PSMA7/PSMD8/PSMA3/PSMA5/PSMA1/PSMB11/PSMA2
WP_CYTOPLASMIC_RIBOSOMAL_PROTEINS	WP_CYTOPLASMIC_RIBOSOMAL_PROTEINS	88	0.702355	2.43915	0.00132275	0.0449944	0.0333012	8096	tags=84%, list=23%, signal=65%	RPL8/RPL35/RPL36A/RPL13/RPS27/RPL38/RPL36/RPL28/RPL14/RPL37/RPS21/RPS15/RPLP2/RPS20/RPSA/RPL18/RPS19/RPS2/RPL37A/RPS28/RPL32/RPL12/RPL18A/RPL39/RPL29/RPL24/RPL7/RPL30/RPS24/RPLP1/RPL27A/RPL23A/RPS10/RPS6/RPS18/RPS16/RPL35A/RPS14/RPL23/RPL19/RPS11/RPL7A/RPL27/RPS9/RPS8/RPS3/UBA52/RPL26/RPS5/RPL31/RPS26/RPS7/RPS17/RPL34/RPL6/RPL3L/FAU/RPS12/RPL11/RPL13A/RPS27A/RPL9/RPL21/RPL4/RPLP0/RPL5/RPS23/RPS15…
KEGG_APOPTOSIS	KEGG_APOPTOSIS	87	-0.428428	-1.7386	0.00404858	0.0449944	0.0333012	9092	tags=47%, list=25%, signal=35%	CAPN2/IRAK2/PIK3R3/PIK3R5/CHUK/PRKAR2A/NTRK1/PRKACB/IL1B/XIAP/CFLAR/IRAK3/CASP7/AKT1/CASP10/PPP3CA/PRKAR1A/PIK3CB/TNFRSF10A/BIRC2/TNFRSF10B/TNF/MAP3K14/MYD88/TNFRSF10D/NFKB1/IL1RAP/AKT3/CHP1/ATM/PIK3CA/CSF2RB/BCL2/APAF1/IL1R1/ENDOD1/FAS/PIK3R1/TNFSF10/PIK3CG/CHP2
REACTOME_FCERI_MEDIATED_MAPK_ACTIVATION	REACTOME_FCERI_MEDIATED_MAPK_ACTIVATION	87	-0.691089	-2.80451	0.00404858	0.0449944	0.0333012	4415	tags=52%, list=12%, signal=45%	IGLV7-43/SOS1/IGHV1-69/PLCG2/IGKV2D-30/IGLV6-57/IGLV1-44/IGLV2-8/IGKV2-28/IGKV1-12/FCER1A/IGHV1-2/IGKV1D-16/IGHV3-13/IGLV1-47/IGKV3D-20/IGKV2-30/IGKV1D-39/IGHV2-70/IGLV1-40/IGKV1D-33/IGLV1-51/IGKV1-16/IGHV2-5/IGHV3-11/IGKV1-33/IGHV4-34/IGLV3-1/IGKV4-1/IGLV3-21/IGKV1-17/IGHV4-59/FOS/IGHV3-7/IGLV2-11/IGHV3-30/IGHV3-23/IGLV3-25/IGLV2-14/IGHV4-39/IGHV3-48/IGKV1-5/IGHV3-33/IGHV3-53/IGKV5-2
REACTOME_PROTEIN_PROTEIN_INTERACTIONS_AT_SYNAPSES	REACTOME_PROTEIN_PROTEIN_INTERACTIONS_AT_SYNAPSES	87	-0.403662	-1.6381	0.00404858	0.0449944	0.0333012	6030	tags=44%, list=17%, signal=36%	STXBP1/DLG1/SYT1/CASK/NLGN4X/EPB41/PPFIA1/NTRK3/PPFIBP2/PTPRF/HOMER2/IL1RAP/SYT7/DLG3/SIPA1L1/GRIN2B/SHANK1/IL1RAPL1/EPB41L5/LRRTM2/NLGN1/PPFIBP1/PTPRS/SLITRK3/PDLIM5/PTPRD/NRXN1/SHANK2/NRXN3/SYT2/DLG2/APBA1/EPB41L1/SLITRK6/GRIN2A/IL1RAPL2/DLGAP2/SYT9
REACTOME_ANTIGEN_ACTIVATES_B_CELL_RECEPTOR_BCR_LEADING_TO_GENERATION_OF_SECOND_MESSENGERS	REACTOME_ANTIGEN_ACTIVATES_B_CELL_RECEPTOR_BCR_LEADING_TO_GENERATION_OF_SECOND_MESSENGERS	86	-0.74079	-2.99534	0.00408163	0.0449944	0.0333012	4415	tags=58%, list=12%, signal=51%	IGLV7-43/SOS1/IGHV1-69/DAPP1/PLCG2/FYN/IGKV2D-30/IGLV6-57/IGLV1-44/IGLV2-8/IGKV2-28/IGKV1-12/IGHV1-2/IGKV1D-16/IGHV3-13/IGLV1-47/IGKV3D-20/IGKV2-30/ITPR2/ITPR1/IGKV1D-39/IGHD/IGHV2-70/IGLV1-40/IGKV1D-33/PIK3R1/IGLV1-51/IGKV1-16/IGHV2-5/IGHV3-11/IGKV1-33/IGHV4-34/IGLV3-1/IGKV4-1/IGLV3-21/IGKV1-17/IGHV4-59/IGHV3-7/IGLV2-11/IGHV3-30/IGHV3-23/BLK/IGLV3-25/IGLV2-14/IGHV4-39/IGHV3-48/IGKV1-5/IGHV3-33/I…
REACTOME_FCERI_MEDIATED_CA_2_MOBILIZATION	REACTOME_FCERI_MEDIATED_CA_2_MOBILIZATION	86	-0.727794	-2.94279	0.00408163	0.0449944	0.0333012	4415	tags=57%, list=12%, signal=50%	IGLV7-43/SOS1/IGHV1-69/PLCG2/IGKV2D-30/IGLV6-57/NFATC3/IGLV1-44/IGLV2-8/IGKV2-28/IGKV1-12/FCER1A/TXK/IGHV1-2/IGKV1D-16/IGHV3-13/ITK/IGLV1-47/IGKV3D-20/IGKV2-30/ITPR2/ITPR1/IGKV1D-39/IGHV2-70/IGLV1-40/IGKV1D-33/IGLV1-51/IGKV1-16/IGHV2-5/IGHV3-11/IGKV1-33/IGHV4-34/IGLV3-1/IGKV4-1/IGLV3-21/IGKV1-17/IGHV4-59/IGHV3-7/IGLV2-11/IGHV3-30/IGHV3-23/IGLV3-25/IGLV2-14/IGHV4-39/IGHV3-48/IGKV1-5/IGHV3-33/IGHV3…
REACTOME_ANTIMICROBIAL_PEPTIDES	REACTOME_ANTIMICROBIAL_PEPTIDES	85	0.619786	2.14363	0.00131234	0.0449944	0.0333012	731	tags=21%, list=2%, signal=21%	PRSS2/CHGA/BPIFB6/REG3G/BPIFA2/BPIFA1/BPIFB2/BPIFB4/BPIFB1/LCN2/S100A7/S100A9/HTN3/HTN1/DEFB126/DEFB133/DEFA5/S100A8
REACTOME_DNA_REPLICATION_PRE_INITIATION	REACTOME_DNA_REPLICATION_PRE_INITIATION	85	0.585169	2.02391	0.00131234	0.0449944	0.0333012	10391	tags=58%, list=29%, signal=41%	PSMD4/CDT1/ORC6/PSMB4/CDC45/PSMB3/E2F2/SEM1/MCM10/UBA52/CDC6/PSMB6/PSMB9/MCM5/RPS27A/MCM7/PSMB8/PSME2/PSMB1/E2F1/PSMD13/ORC1/PSMB7/PSMC4/POLE4/MCM2/PSMC5/PSMC3/PSMD14/POLA2/GMNN/MCM4/POLE2/RPA4/PSMA4/PSMB2/PSMB5/CDC7/PSMA7/PSMD8/PSMA3/PSMA5/MCM6/PSMA1/RPA3/PSMB11/PSMA2/MCM3/DBF4
KEGG_TGF_BETA_SIGNALING_PATHWAY	KEGG_TGF_BETA_SIGNALING_PATHWAY	85	-0.41332	-1.66088	0.00416667	0.0449944	0.0333012	9004	tags=59%, list=25%, signal=44%	TGFB2/TGFBR1/CUL1/GDF5/BMP8B/SMAD3/RPS6KB1/ACVR2A/ACVR1/ROCK2/SMURF2/SMAD4/MAPK1/SP1/BMP2/TGFB3/ZFYVE16/TNF/BMP4/PPP2CB/SMURF1/ID2/SMAD7/ZFYVE9/PPP2R1B/CREBBP/SMAD6/LTBP1/SMAD9/ID4/EP300/AMHR2/BMP6/BMPR2/COMP/THBS4/BMP5/ROCK1/TGFBR2/ACVR1C/GDF6/GDF7/SMAD1/THBS2/BMPR1B/THBS1/RBL2/INHBA/DCN/INHBC
KEGG_SMALL_CELL_LUNG_CANCER	KEGG_SMALL_CELL_LUNG_CANCER	84	-0.40848	-1.63466	0.00420168	0.0449944	0.0333012	7955	tags=44%, list=22%, signal=34%	PTEN/XIAP/AKT1/ITGAV/LAMB2/RARB/PIK3CB/BIRC2/ITGA6/CCNE1/CDKN1B/PIAS1/TRAF6/RB1/COL4A2/COL4A6/NFKB1/CDK6/FN1/AKT3/ITGA2/PIK3CA/CCND1/COL4A1/BCL2/APAF1/LAMB3/LAMC2/LAMC3/ITGB1/PIK3R1/LAMA3/NOS2/COL4A4/PIK3CG/LAMA2/PTGS2
REACTOME_INTEGRIN_CELL_SURFACE_INTERACTIONS	REACTOME_INTEGRIN_CELL_SURFACE_INTERACTIONS	84	-0.496055	-1.98512	0.00420168	0.0449944	0.0333012	5082	tags=43%, list=14%, signal=37%	JAM2/IBSP/COL4A2/COL4A6/ITGA8/COL1A1/ITGA10/FN1/COL5A1/ITGA1/ITGA2/TNC/COL18A1/COL4A1/COMP/ICAM3/COL3A1/COL8A1/VWF/ITGB7/ITGB1/LUM/FBN1/ITGA9/CDH1/COL4A3/VCAM1/COL4A4/ITGAD/KDR/ITGB3/THBS1/ITGA4/HSPG2/COL6A6/COL10A1
KEGG_ECM_RECEPTOR_INTERACTION	KEGG_ECM_RECEPTOR_INTERACTION	83	-0.582943	-2.33734	0.00413223	0.0449944	0.0333012	7423	tags=58%, list=21%, signal=46%	COL5A3/CHAD/ITGAV/LAMB2/ITGA7/COL6A3/ITGA6/COL1A2/ITGB8/CD36/IBSP/COL4A2/COL4A6/ITGA8/COL1A1/ITGA10/FN1/COL5A1/ITGA1/ITGA2/TNC/SV2B/COL4A1/COMP/THBS4/LAMB3/LAMC2/GP1BA/LAMC3/COL3A1/VWF/ITGB7/ITGB1/ITGA9/LAMA3/THBS2/COL4A4/TNN/ITGB3/THBS1/ITGA4/HSPG2/COL6A6/LAMA2/GP5/TNR/TNXB/GP6
REACTOME_ROLE_OF_PHOSPHOLIPIDS_IN_PHAGOCYTOSIS	REACTOME_ROLE_OF_PHOSPHOLIPIDS_IN_PHAGOCYTOSIS	82	-0.702064	-2.80231	0.00421941	0.0449944	0.0333012	4919	tags=67%, list=14%, signal=58%	IGKV2D-40/IGHG2/IGKV1D-12/IGHG4/IGKV1-39/CD3G/IGLV7-43/IGHV1-69/PLD1/PIK3CA/PLCG2/IGKV2D-30/IGLV6-57/PRKCE/IGLV1-44/IGLV2-8/IGKV2-28/IGKV1-12/IGHV1-2/IGKV1D-16/IGHV3-13/IGLV1-47/IGKV3D-20/IGKV2-30/ITPR2/ITPR1/PLPP4/IGKV1D-39/IGHV2-70/IGLV1-40/IGKV1D-33/PIK3R1/IGLV1-51/IGKV1-16/IGHV2-5/IGHV3-11/IGKV1-33/IGHV4-34/IGLV3-1/IGKV4-1/IGLV3-21/IGKV1-17/IGHV4-59/IGHV3-7/IGLV2-11/IGHV3-30/IGHV3-23/IGLV3-25…
WP_SIGNALING_PATHWAYS_IN_GLIOBLASTOMA	WP_SIGNALING_PATHWAYS_IN_GLIOBLASTOMA	82	-0.422189	-1.68518	0.00421941	0.0449944	0.0333012	8660	tags=55%, list=24%, signal=42%	CDKN1A/PLCG1/ARAF/PTEN/BRAF/AKT1/MAPK1/FOXO4/CBL/ERRFI1/PRKCQ/PIK3CB/KRAS/CCNE1/CDKN1B/PRKCZ/PRKCB/SPRY2/MAP2K1/RB1/FGFR2/PDGFRB/PRKCA/MDM2/NF1/CDK6/AKT3/MAP2K6/ATM/PIK3CA/CCND1/PLCG2/PDPK1/EP300/IRS1/MET/PRKCH/PIK3C2A/GAB1/PIK3C2G/FOXO1/EGFR/ERBB2/PIK3R1/PIK3CG
REACTOME_THE_ROLE_OF_GTSE1_IN_G2_M_PROGRESSION_AFTER_G2_CHECKPOINT	REACTOME_THE_ROLE_OF_GTSE1_IN_G2_M_PROGRESSION_AFTER_G2_CHECKPOINT	79	0.611751	2.09311	0.00131752	0.0449944	0.0333012	10262	tags=62%, list=29%, signal=44%	TUBA3E/TUBA3C/TUBB8/TUBAL3/PSMD4/TUBA4B/PSMB4/PLK1/GTSE1/TUBA4A/PSMB3/TUBB8B/CDK1/CCNB1/TUBB4B/SEM1/CCNB2/UBA52/TUBA3D/PSMB6/PSMB9/RPS27A/TUBB4A/PSMB8/PSME2/PSMB1/FKBPL/TUBA1C/PSMD13/PSMB7/PSMC4/TUBB2B/PSMC5/PSMC3/TUBA1A/PSMD14/PSMA4/PSMB2/TUBB2A/PSMB5/HSP90AB1/PSMA7/PSMD8/PSMA3/PSMA5/PSMA1/PSMB11/MAPRE1/PSMA2
REACTOME_INITIAL_TRIGGERING_OF_COMPLEMENT	REACTOME_INITIAL_TRIGGERING_OF_COMPLEMENT	79	-0.736327	-2.92707	0.00411523	0.0449944	0.0333012	3805	tags=71%, list=11%, signal=63%	IGKV2D-40/IGHG2/IGKV1D-12/IGHG4/C1R/IGKV1-39/IGLV7-43/IGHV1-69/C4A/C4B/MBL2/IGKV2D-30/C1S/IGLV6-57/IGLV1-44/IGLV2-8/IGKV2-28/IGKV1-12/IGHV1-2/IGKV1D-16/CFP/IGHV3-13/IGLV1-47/IGKV3D-20/IGKV2-30/IGKV1D-39/IGHV2-70/IGLV1-40/IGKV1D-33/IGLV1-51/IGKV1-16/MASP1/IGHV2-5/IGHV3-11/IGKV1-33/IGHV4-34/IGLV3-1/IGKV4-1/IGLV3-21/IGKV1-17/IGHV4-59/IGHV3-7/IGLV2-11/IGHV3-30/IGHV3-23/IGLV3-25/IGLV2-14/IGHV4-39/IGHV…
KEGG_PEROXISOME	KEGG_PEROXISOME	78	-0.54746	-2.16418	0.0041841	0.0449944	0.0333012	5763	tags=46%, list=16%, signal=39%	PEX11G/PEX13/AGXT/DDO/PEX3/PXMP2/PIPOX/SLC27A2/PEX12/PHYH/PEX11A/ABCD3/CROT/HSD17B4/MLYCD/NUDT12/ACOX2/ACSL5/DAO/ACAA1/ACSL6/FAR2/PEX1/ABCD2/ACSL1/BAAT/CAT/SCP2/NOS2/ACOX1/HAO1/EPHX2/HAO2/AMACR/EHHADH/XDH
REACTOME_ECM_PROTEOGLYCANS	REACTOME_ECM_PROTEOGLYCANS	76	-0.47589	-1.87911	0.00414938	0.0449944	0.0333012	5045	tags=45%, list=14%, signal=39%	LRP4/IBSP/COL4A2/APP/COL4A6/ITGA8/COL1A1/NCAM1/FN1/COL5A1/ITGA2/TNC/ASPN/COL4A1/COMP/NCAN/COL3A1/PTPRS/VCAN/ITGB1/LUM/ITGA9/COL4A3/LAMA3/COL4A4/MUSK/TNN/ITGB3/HSPG2/COL6A6/LAMA2/DCN/TNR/TNXB
WP_LEPTIN_SIGNALING_PATHWAY	WP_LEPTIN_SIGNALING_PATHWAY	76	-0.418417	-1.65218	0.00414938	0.0449944	0.0333012	8570	tags=55%, list=24%, signal=42%	PLCG1/MAPK8/STAT1/CHUK/GSK3B/RPS6KB1/CREB1/SOCS3/PTEN/ROCK2/IL1B/AKT1/MAPK1/SP1/EIF4E/NOS3/MAP2K1/PRKAA1/STAT5B/NCOA1/CFL2/NFKB1/SOS1/JAK2/CCND1/PLCG2/PTPN11/FYN/MTOR/JAK1/IRS1/CISH/ACACB/FOXO1/ROCK1/REL/PDE3B/ERBB2/SOCS2/PIK3R1/LEPR/ESR1
REACTOME_CONSTITUTIVE_SIGNALING_BY_ABERRANT_PI3K_IN_CANCER	REACTOME_CONSTITUTIVE_SIGNALING_BY_ABERRANT_PI3K_IN_CANCER	75	-0.495649	-1.94213	0.00416667	0.0449944	0.0333012	5405	tags=41%, list=15%, signal=35%	FGFR2/PDGFRB/FGF16/IRS2/STRN/CD28/PIK3CA/PTPN11/FYN/FRS2/NRG3/IRS1/AREG/MET/FGF18/EREG/GAB1/EGFR/FGF2/TRAT1/FGF20/TGFA/ERBB2/PIK3R1/KIT/FGF7/NRG1/FGF23/KL/FGF5/ESR1
KEGG_CARDIAC_MUSCLE_CONTRACTION	KEGG_CARDIAC_MUSCLE_CONTRACTION	74	0.561983	1.91037	0.00131406	0.0449944	0.0333012	7255	tags=51%, list=20%, signal=41%	TNNT2/CACNG4/COX8C/TNNC1/MYL3/CACNG6/CACNA2D3/COX7B2/COX7A1/TPM2/COX6C/COX6B1/TNNI3/CYC1/CACNG1/ATP1B3/COX4I1/MYH6/UQCRB/CACNG2/COX4I2/UQCRQ/COX5B/UQCRH/UQCR10/CACNA1F/CACNB1/COX6A1/COX7B/UQCR11/CACNG7/ATP1B1/COX8A/TPM3/UQCRHL/COX7A2/COX5A/COX7C
REACTOME_APC_C_CDH1_MEDIATED_DEGRADATION_OF_CDC20_AND_OTHER_APC_C_CDH1_TARGETED_PROTEINS_IN_LATE_MITOSIS_EARLY_G1	REACTOME_APC_C_CDH1_MEDIATED_DEGRADATION_OF_CDC20_AND_OTHER_APC_C_CDH1_TARGETED_PROTEINS_IN_LATE_MITOSIS_EARLY_G1	74	0.553643	1.88202	0.00131406	0.0449944	0.0333012	10262	tags=51%, list=29%, signal=37%	UBE2C/AURKB/UBE2S/CDC20/PTTG1/PSMD4/PSMB4/PLK1/PSMB3/ANAPC11/SEM1/UBA52/PSMB6/ANAPC7/PSMB9/AURKA/RPS27A/PSMB8/PSME2/PSMB1/PSMD13/PSMB7/PSMC4/PSMC5/PSMC3/PSMD14/PSMA4/CDC16/PSMB2/UBE2E1/PSMB5/PSMA7/PSMD8/PSMA3/PSMA5/PSMA1/PSMB11/PSMA2
PID_AVB3_INTEGRIN_PATHWAY	PID_AVB3_INTEGRIN_PATHWAY	74	-0.461419	-1.80763	0.00414938	0.0449944	0.0333012	4713	tags=36%, list=13%, signal=32%	COL4A6/COL1A1/FN1/COL5A1/PIK3CA/PTPN11/ILK/PTK2B/COL4A1/IRS1/PIK3C2A/ANGPTL3/COL15A1/COL12A1/ROCK1/COL3A1/ADGRA2/FGF2/COL8A1/TGFBR2/PIK3R1/COL4A3/COL4A4/KDR/ITGB3/COL14A1/COL10A1
KEGG_ADHERENS_JUNCTION	KEGG_ADHERENS_JUNCTION	73	-0.433545	-1.69974	0.00416667	0.0449944	0.0333012	7773	tags=41%, list=22%, signal=32%	PTPRJ/YES1/SMAD4/MAPK1/INSR/SSX2IP/FARP2/CTNNB1/AFDN/FER/CREBBP/PTPRF/TJP1/WASL/FYN/IQGAP1/EP300/PTPRM/MET/LMO7/CTNND1/EGFR/TGFBR2/NECTIN3/SORBS1/WASF3/PTPRB/ERBB2/CDH1/CTNNA3
REACTOME_DEPOSITION_OF_NEW_CENPA_CONTAINING_NUCLEOSOMES_AT_THE_CENTROMERE	REACTOME_DEPOSITION_OF_NEW_CENPA_CONTAINING_NUCLEOSOMES_AT_THE_CENTROMERE	73	0.503137	1.70524	0.00524934	0.0488256	0.0361367	9191	tags=58%, list=26%, signal=43%	CENPM/H2AC20/CENPW/H2BC10/HJURP/H2AC18/CENPA/H2BC9/H2AX/H2BU1/H2AC14/CENPL/H2AB1/H4C13/H4C11/H4C2/H2AC4/CENPH/H4C5/H2AJ/H4C4/H2AC7/CENPX/ITGB3BP/CENPO/H2AC19/RUVBL1/CENPS/H4C14/CENPT/H4C15/H2AZ1/OIP5/NPM1/H4C1/H4C6/H2BC3/CENPU/H2BC14/H2BC17/H2BC11/H2AC8
REACTOME_ORC1_REMOVAL_FROM_CHROMATIN	REACTOME_ORC1_REMOVAL_FROM_CHROMATIN	71	0.577827	1.94964	0.001321	0.0449944	0.0333012	10374	tags=56%, list=29%, signal=40%	PSMD4/CDT1/ORC6/PSMB4/PSMB3/SEM1/UBA52/CDC6/RBX1/PSMB6/PSMB9/MCM5/RPS27A/MCM7/PSMB8/PSME2/PSMB1/CCNA1/PSMD13/ORC1/PSMB7/PSMC4/MCM2/PSMC5/PSMC3/PSMD14/MCM4/PSMA4/PSMB2/PSMB5/CCNA2/PSMA7/PSMD8/PSMA3/PSMA5/MCM6/PSMA1/PSMB11/PSMA2/MCM3
KEGG_DRUG_METABOLISM_CYTOCHROME_P450	KEGG_DRUG_METABOLISM_CYTOCHROME_P450	71	-0.639715	-2.49379	0.00408163	0.0449944	0.0333012	3314	tags=51%, list=9%, signal=46%	GSTA5/MAOB/FMO4/ADH1C/CYP2E1/UGT2B15/ADH6/CYP2C18/UGT2B7/AOX1/ADH1A/ALDH1A3/UGT1A1/CYP2C9/GSTZ1/UGT2B10/UGT2A3/CYP3A43/UGT1A4/CYP2C19/CYP2C8/GSTA2/ADH4/ADH7/FMO2/UGT1A3/CYP3A4/CYP2A6/ADH1B/CYP2B6/GSTM5/GSTM1/UGT2B17/CYP1A2/CYP2A7/CYP2A13
REACTOME_CREATION_OF_C4_AND_C2_ACTIVATORS	REACTOME_CREATION_OF_C4_AND_C2_ACTIVATORS	71	-0.758975	-2.9587	0.00408163	0.0449944	0.0333012	3657	tags=63%, list=10%, signal=57%	MBL2/IGKV2D-30/C1S/IGLV6-57/IGLV1-44/IGLV2-8/IGKV2-28/IGKV1-12/IGHV1-2/IGKV1D-16/IGHV3-13/IGLV1-47/IGKV3D-20/IGKV2-30/IGKV1D-39/IGHV2-70/IGLV1-40/IGKV1D-33/IGLV1-51/IGKV1-16/MASP1/IGHV2-5/IGHV3-11/IGKV1-33/IGHV4-34/IGLV3-1/IGKV4-1/IGLV3-21/IGKV1-17/IGHV4-59/IGHV3-7/IGLV2-11/IGHV3-30/IGHV3-23/IGLV3-25/IGLV2-14/IGHV4-39/IGHV3-48/IGKV1-5/IGHV3-33/IGHV3-53/IGKV5-2/COLEC10/FCN3/FCN2
REACTOME_ROLE_OF_LAT2_NTAL_LAB_ON_CALCIUM_MOBILIZATION	REACTOME_ROLE_OF_LAT2_NTAL_LAB_ON_CALCIUM_MOBILIZATION	71	-0.742104	-2.89293	0.00408163	0.0449944	0.0333012	4415	tags=66%, list=12%, signal=58%	IGLV7-43/SOS1/IGHV1-69/PIK3CA/PDPK1/FYN/IGKV2D-30/IGLV6-57/IGLV1-44/IGLV2-8/IGKV2-28/IGKV1-12/FCER1A/IGHV1-2/IGKV1D-16/IGHV3-13/IGLV1-47/IGKV3D-20/IGKV2-30/IGKV1D-39/IGHV2-70/IGLV1-40/IGKV1D-33/PIK3R1/IGLV1-51/IGKV1-16/IGHV2-5/IGHV3-11/IGKV1-33/IGHV4-34/IGLV3-1/IGKV4-1/IGLV3-21/IGKV1-17/IGHV4-59/IGHV3-7/IGLV2-11/IGHV3-30/IGHV3-23/IGLV3-25/IGLV2-14/IGHV4-39/IGHV3-48/IGKV1-5/IGHV3-33/IGHV3-53/IGKV5…
REACTOME_CIRCADIAN_CLOCK	REACTOME_CIRCADIAN_CLOCK	70	-0.419231	-1.64121	0.004	0.0449944	0.0333012	8888	tags=56%, list=25%, signal=42%	CUL1/CARM1/F7/PER1/KLF15/CREB1/RBM4/BHLHE40/HIF1A/NCOA2/NFIL3/USP46/CRY1/RAI1/MED1/CRY2/NCOA1/ARNTL/HELZ2/BHLHE41/TBL1X/MEF2C/FBXL3/PER2/CREBBP/NAMPT/SIRT1/PPARGC1A/EP300/NR3C1/CLOCK/NCOR1/PPARA/CHD9/NOCT/RORA/NRIP1/CPT1A/SIK1
KEGG_COMPLEMENT_AND_COAGULATION_CASCADES	KEGG_COMPLEMENT_AND_COAGULATION_CASCADES	69	-0.562225	-2.19921	0.00398406	0.0449944	0.0333012	6658	tags=57%, list=19%, signal=46%	FGA/F7/F5/F2/BDKRB1/C9/SERPING1/C3/C5/F13B/F3/CPB2/C1R/SERPINA5/SERPIND1/CFI/F12/C4A/C4B/MBL2/C1S/C8B/KNG1/PROS1/PLAT/F2R/CR1/C8A/VWF/KLKB1/THBD/F8/F9/MASP1/PLG/F11/C6/BDKRB2/C7
KEGG_METABOLISM_OF_XENOBIOTICS_BY_CYTOCHROME_P450	KEGG_METABOLISM_OF_XENOBIOTICS_BY_CYTOCHROME_P450	69	-0.567974	-2.2217	0.00398406	0.0449944	0.0333012	2506	tags=45%, list=7%, signal=42%	GSTA5/CYP1A1/CYP1B1/ADH1C/CYP2E1/UGT2B15/ADH6/CYP2C18/UGT2B7/ADH1A/ALDH1A3/UGT1A1/CYP2C9/GSTZ1/UGT2B10/UGT2A3/CYP3A43/UGT1A4/CYP2C19/CYP2C8/GSTA2/ADH4/ADH7/UGT1A3/CYP3A4/ADH1B/CYP2B6/GSTM5/GSTM1/UGT2B17/CYP1A2
KEGG_PPAR_SIGNALING_PATHWAY	KEGG_PPAR_SIGNALING_PATHWAY	69	-0.463708	-1.81385	0.00398406	0.0449944	0.0333012	4520	tags=45%, list=13%, signal=39%	APOA5/SLC27A2/PDPK1/ILK/CYP7A1/AQP7/PPARA/ACOX2/ACSL5/ACAA1/PCK2/ACADL/CPT2/ACSL6/HMGCS2/PLIN1/SORBS1/ACSL1/SLC27A5/CPT1A/SCP2/CYP4A11/ACOX1/PCK1/FABP4/ACADM/SCD5/CYP8B1/CYP4A22/ADIPOQ/EHHADH
PID_VEGFR1_2_PATHWAY	PID_VEGFR1_2_PATHWAY	69	-0.466515	-1.82483	0.00398406	0.0449944	0.0333012	7773	tags=48%, list=22%, signal=38%	PTPRJ/CAV1/BRAF/GRB10/AKT1/MAPK1/ITGAV/CBL/NCK1/PRKCB/NOS3/MAP2K1/PRKAA1/AKAP1/CTNNB1/FBXW11/PRKCA/MAP2K6/PIK3CA/PTPN11/PDPK1/FYN/IQGAP1/FLT1/PTK2B/NEDD4/CDH5/GAB1/ROCK1/MYOF/PIK3R1/KDR/ITGB3
REACTOME_FCGR_ACTIVATION	REACTOME_FCGR_ACTIVATION	69	-0.729895	-2.85507	0.00398406	0.0449944	0.0333012	5875	tags=70%, list=16%, signal=58%	IGKV2D-40/IGHG2/IGKV1D-12/IGHG4/IGKV1-39/CD3G/IGLV7-43/IGHV1-69/FYN/IGKV2D-30/IGLV6-57/IGLV1-44/IGLV2-8/IGKV2-28/IGKV1-12/IGHV1-2/IGKV1D-16/IGHV3-13/IGLV1-47/IGKV3D-20/IGKV2-30/IGKV1D-39/IGHV2-70/IGLV1-40/IGKV1D-33/IGLV1-51/IGKV1-16/IGHV2-5/IGHV3-11/IGKV1-33/IGHV4-34/IGLV3-1/IGKV4-1/IGLV3-21/IGKV1-17/IGHV4-59/IGHV3-7/IGLV2-11/IGHV3-30/IGHV3-23/IGLV3-25/IGLV2-14/IGHV4-39/IGHV3-48/IGKV1-5/IGHV3-33/…
REACTOME_SCAVENGING_OF_HEME_FROM_PLASMA	REACTOME_SCAVENGING_OF_HEME_FROM_PLASMA	69	-0.765225	-2.99327	0.00398406	0.0449944	0.0333012	4415	tags=67%, list=12%, signal=59%	IGLV7-43/IGHV1-69/HPX/IGKV2D-30/IGLV6-57/IGLV1-44/IGLV2-8/IGKV2-28/IGKV1-12/ALB/IGHV1-2/IGKV1D-16/IGHV3-13/IGLV1-47/IGKV3D-20/IGKV2-30/IGHA2/IGKV1D-39/IGHV2-70/IGLV1-40/IGHA1/IGKV1D-33/IGLV1-51/IGKV1-16/IGHV2-5/IGHV3-11/IGKV1-33/IGHV4-34/IGLV3-1/JCHAIN/IGKV4-1/IGLV3-21/IGKV1-17/IGHV4-59/IGHV3-7/IGLV2-11/IGHV3-30/IGHV3-23/IGLV3-25/IGLV2-14/IGHV4-39/IGHV3-48/IGKV1-5/IGHV3-33/IGHV3-53/IGKV5-2
REACTOME_ASSEMBLY_OF_THE_PRE_REPLICATIVE_COMPLEX	REACTOME_ASSEMBLY_OF_THE_PRE_REPLICATIVE_COMPLEX	68	0.583342	1.93808	0.00135318	0.0449944	0.0333012	10374	tags=59%, list=29%, signal=42%	PSMD4/CDT1/ORC6/PSMB4/PSMB3/E2F2/SEM1/UBA52/CDC6/PSMB6/PSMB9/MCM5/RPS27A/MCM7/PSMB8/PSME2/PSMB1/E2F1/PSMD13/ORC1/PSMB7/PSMC4/MCM2/PSMC5/PSMC3/PSMD14/GMNN/MCM4/PSMA4/PSMB2/PSMB5/PSMA7/PSMD8/PSMA3/PSMA5/MCM6/PSMA1/PSMB11/PSMA2/MCM3
WP_AMPACTIVATED_PROTEIN_KINASE_AMPK_SIGNALING	WP_AMPACTIVATED_PROTEIN_KINASE_AMPK_SIGNALING	68	-0.462448	-1.82261	0.00380228	0.0449944	0.0333012	8746	tags=51%, list=24%, signal=39%	PIK3R3/CAMKK2/CDKN1A/HNF4A/RPS6KB1/SLC2A4/PRKACB/EEF2/BORCS8-MEF2B/AKT1/FASN/CAB39/INSR/PIK3CB/HMGCR/EEF2K/PIK3C3/PRKAA1/STRADB/PIK3CA/ADIPOR2/MTOR/PFKFB3/LIPE/ACACB/CPT1A/PIK3R1/PRKAG2/ADRA1B/PIK3CG/ADIPOQ/LEPR/GYS2/ADRA1A/INS-IGF2
REACTOME_G1_S_DNA_DAMAGE_CHECKPOINTS	REACTOME_G1_S_DNA_DAMAGE_CHECKPOINTS	68	0.509175	1.69167	0.00405954	0.0449944	0.0333012	10262	tags=54%, list=29%, signal=39%	PSMD4/PSMB4/CDKN2A/CDC25A/PSMB3/PCBP4/SEM1/UBA52/PSMB6/PSMB9/RPS27A/PSMB8/PSME2/PSMB1/CCNA1/PSMD13/PSMB7/PSMC4/COP1/PSMC5/CHEK1/PSMC3/PSMD14/MDM4/PSMA4/PSMB2/PSMB5/ZNF385A/CCNA2/PSMA7/CHEK2/PSMD8/PSMA3/PSMA5/PSMA1/PSMB11/PSMA2
REACTOME_DISEASES_ASSOCIATED_WITH_O_GLYCOSYLATION_OF_PROTEINS	REACTOME_DISEASES_ASSOCIATED_WITH_O_GLYCOSYLATION_OF_PROTEINS	67	-0.54398	-2.12355	0.003861	0.0449944	0.0333012	6891	tags=52%, list=19%, signal=42%	ADAMTS4/ADAMTS18/ADAMTS8/B4GAT1/ADAMTSL4/MUCL1/ADAMTS15/ADAMTSL1/NOTCH4/ADAMTS2/THSD1/MUC21/MUC6/ADAMTS12/NOTCH3/MUC16/LARGE1/ADAMTSL2/ADAMTS1/CFP/NOTCH2/MUC5B/THSD7A/GALNT12/MUC3A/GALNT3/THBS2/SEMA5A/SPON1/THBS1/ADAMTSL3/MUC5AC/THSD7B/THSD4/ADAMTS16
WP_PPAR_SIGNALING_PATHWAY	WP_PPAR_SIGNALING_PATHWAY	67	-0.438361	-1.71124	0.003861	0.0449944	0.0333012	4520	tags=43%, list=13%, signal=38%	APOA5/SLC27A2/PDPK1/ILK/CYP7A1/AQP7/PPARA/ACOX2/ACSL5/ACAA1/PCK2/ACADL/CPT2/ACSL6/HMGCS2/PLIN1/SORBS1/ACSL1/SLC27A5/CPT1A/SCP2/CYP4A11/ACOX1/PCK1/FABP4/ACADM/CYP8B1/ADIPOQ/EHHADH
PID_INTEGRIN1_PATHWAY	PID_INTEGRIN1_PATHWAY	66	-0.509971	-1.97021	0.00387597	0.0449944	0.0333012	7340	tags=53%, list=20%, signal=42%	ITGAV/LAMB2/ITGA7/NID1/COL6A3/NPNT/ITGA6/COL1A2/TGFBI/JAM2/COL4A6/ITGA8/COL1A1/ITGA10/FN1/COL5A1/ITGA1/ITGA2/TNC/COL18A1/COL4A1/LAMB3/LAMC2/COL3A1/ITGB1/FBN1/ITGA9/COL4A3/LAMA3/THBS2/VCAM1/COL4A4/THBS1/ITGA4/LAMA2
REACTOME_MITOCHONDRIAL_PROTEIN_IMPORT	REACTOME_MITOCHONDRIAL_PROTEIN_IMPORT	64	0.524992	1.73184	0.00271739	0.0449944	0.0333012	9802	tags=58%, list=27%, signal=42%	COA6/CHCHD10/TOMM40/ATP5MC1/TIMM13/CYC1/TIMM17B/GFER/TIMM50/TOMM5/TIMM10/MTX1/NDUFB8/CHCHD7/COX17/IDH3G/PAM16/COX19/TIMM17A/TIMM8B/CHCHD5/TAZ/TIMM22/COA4/TIMM44/TOMM20/TIMM9/BCS1L/SLC25A6/CHCHD2/TOMM22/TOMM7/PMPCA/TIMM23/CMC2/HSCB/VDAC1
KEGG_RETINOL_METABOLISM	KEGG_RETINOL_METABOLISM	64	-0.66345	-2.55706	0.0037594	0.0449944	0.0333012	2317	tags=50%, list=6%, signal=47%	RETSAT/ADH1C/UGT2B15/ADH6/CYP2C18/UGT2B7/BCO1/ADH1A/CYP4A11/UGT1A1/CYP2C9/UGT2B10/UGT2A3/CYP3A43/RDH16/UGT1A4/RDH5/CYP4A22/CYP2C19/CYP2C8/ADH4/ADH7/UGT1A3/CYP3A4/CYP2A6/ADH1B/CYP2B6/CYP26A1/UGT2B17/CYP1A2/CYP2A7/CYP2A13
REACTOME_CYTOCHROME_P450_ARRANGED_BY_SUBSTRATE_TYPE	REACTOME_CYTOCHROME_P450_ARRANGED_BY_SUBSTRATE_TYPE	64	-0.614119	-2.36693	0.0037594	0.0449944	0.0333012	5363	tags=56%, list=15%, signal=48%	NCOA1/CYP46A1/CYP11B1/CYP4F12/AHR/CYP7B1/CYP4F8/CYP7A1/CYP1A1/CYP11A1/CYP2J2/CYP1B1/CYP2U1/CYP2E1/CYP2C18/CYP4F3/CYP4A11/CYP39A1/CYP2C9/CYP51A1/CYP4B1/CYP4F2/CYP3A43/CYP4V2/CYP8B1/CYP4A22/CYP2C19/CYP2C8/CYP3A4/CYP2A6/CYP2B6/PTGIS/CYP26A1/CYP1A2/CYP2A7/CYP2A13
REACTOME_PEROXISOMAL_PROTEIN_IMPORT	REACTOME_PEROXISOMAL_PROTEIN_IMPORT	63	-0.545056	-2.09445	0.0037037	0.0449944	0.0333012	7054	tags=49%, list=20%, signal=40%	CRAT/PECR/HACL1/NUDT7/PEX13/AGXT/DDO/PIPOX/SLC27A2/PEX12/PHYH/CROT/USP9X/HSD17B4/MLYCD/ACOT2/LONP2/ACOX2/DAO/ACAA1/PEX1/BAAT/CAT/SCP2/NOS2/ACOX1/HAO1/EPHX2/HAO2/AMACR/EHHADH
WP_ENDOMETRIAL_CANCER	WP_ENDOMETRIAL_CANCER	63	-0.438024	-1.68317	0.0037037	0.0449944	0.0333012	8746	tags=59%, list=24%, signal=44%	NRAS/TCF7L2/PIK3R3/CDKN1A/ARAF/GSK3B/APC2/PTEN/BRAF/AKT1/MAPK1/FGF1/AXIN2/PIK3CB/KRAS/MAP2K1/CTNNB1/FGFR2/GADD45B/AKT3/SOS1/PIK3CA/CCND1/PDPK1/POLK/DDB2/ILK/SOS2/APC/EGFR/FGF2/GADD45A/ERBB2/CDH1/PIK3R1/FOS/CTNNA3
REACTOME_BASE_EXCISION_REPAIR_AP_SITE_FORMATION	REACTOME_BASE_EXCISION_REPAIR_AP_SITE_FORMATION	63	0.509297	1.67351	0.00546448	0.0494798	0.0366209	9191	tags=54%, list=26%, signal=40%	H2AC20/H2BC10/H2AC18/H2BC9/H2AX/H3-4/H2BU1/H2AC14/NEIL3/H2AB1/H4C13/H4C11/H4C2/H2AC4/ACD/H4C5/H2AJ/H4C4/H2AC7/H2AC19/SMUG1/NTHL1/H4C14/H4C15/H2AZ1/MUTYH/OGG1/H4C1/H4C6/H2BC3/H2BC14/H2BC17/H2BC11/H2AC8
WP_PROTEASOME_DEGRADATION	WP_PROTEASOME_DEGRADATION	62	0.521541	1.71332	0.00270636	0.0449944	0.0333012	10262	tags=50%, list=29%, signal=36%	UCHL1/PSMD4/PSMB4/H2AX/PSMB3/UCHL3/H2AC4/HLA-A/PSMB6/HLA-F/PSMB9/PSMB8/PSME2/PSMB1/HLA-G/PSMD13/HLA-B/PSMB7/PSMC4/PSMC5/PSMC3/H2AZ1/PSMA4/PSMB2/PSMB5/PSMA7/PSMD8/PSMA3/PSMA5/PSMA1/PSMA2
REACTOME_O_LINKED_GLYCOSYLATION_OF_MUCINS	REACTOME_O_LINKED_GLYCOSYLATION_OF_MUCINS	62	-0.429051	-1.63871	0.00380228	0.0449944	0.0333012	4639	tags=34%, list=13%, signal=30%	GCNT4/MUC21/MUC6/ST6GALNAC3/B3GNT2/MUC16/ST3GAL1/GALNT16/B3GNT7/GALNT5/MUC5B/GALNT7/GALNT12/MUC3A/GALNT3/GALNT17/MUC5AC/GALNT15/GALNT4/CHST4/GALNTL6
WP_OXIDATION_BY_CYTOCHROME_P450	WP_OXIDATION_BY_CYTOCHROME_P450	62	-0.655715	-2.50443	0.00380228	0.0449944	0.0333012	3461	tags=53%, list=10%, signal=48%	CYP4F8/CYP7A1/CYP1A1/CYP4Z1/CYP11A1/CYP27C1/CYP2J2/CYP1B1/CYP2U1/CYP2E1/CYP2C18/CYP4F3/CYP4X1/CYP4A11/CYP39A1/CYP2C9/CYP51A1/CYP4B1/CYP4F2/CYP3A43/CYP4V2/CYP8B1/CYP4A22/CYP2C19/CYP2C8/CYP3A4/CYP2A6/CYP2B6/CYP26A1/CYP2G1P/CYP1A2/CYP2A7/CYP2A13
KEGG_GLYCOLYSIS_GLUCONEOGENESIS	KEGG_GLYCOLYSIS_GLUCONEOGENESIS	61	-0.472491	-1.80878	0.0037594	0.0449944	0.0333012	4089	tags=34%, list=11%, signal=31%	DLD/ALDH2/ALDH1B1/PGM2/PGAM4/PCK2/ADH1C/PGM1/ADH6/FBP2/G6PC/ADH1A/LDHAL6B/ALDH1A3/PCK1/FBP1/ALDOB/ADH4/ADH7/ADH1B/ENO3
REACTOME_CD22_MEDIATED_BCR_REGULATION	REACTOME_CD22_MEDIATED_BCR_REGULATION	61	-0.791177	-3.02877	0.0037594	0.0449944	0.0333012	3566	tags=66%, list=10%, signal=59%	IGKV2D-30/IGLV6-57/IGLV1-44/IGLV2-8/IGKV2-28/IGKV1-12/IGHV1-2/IGKV1D-16/IGHV3-13/IGLV1-47/IGKV3D-20/IGKV2-30/IGKV1D-39/IGHD/IGHV2-70/IGLV1-40/IGKV1D-33/IGLV1-51/IGKV1-16/IGHV2-5/IGHV3-11/IGKV1-33/IGHV4-34/IGLV3-1/IGKV4-1/IGLV3-21/IGKV1-17/IGHV4-59/IGHV3-7/IGLV2-11/IGHV3-30/IGHV3-23/IGLV3-25/IGLV2-14/IGHV4-39/IGHV3-48/IGKV1-5/IGHV3-33/IGHV3-53/IGKV5-2
REACTOME_KINESINS	REACTOME_KINESINS	61	0.509009	1.667	0.00407609	0.0449944	0.0333012	7283	tags=54%, list=20%, signal=43%	TUBA3E/TUBA3C/TUBB8/KLC3/TUBAL3/KIF2C/TUBA4B/KIF21B/TUBA4A/TUBB8B/KIFC1/KIF3C/TUBB4B/KIF25/KIF18B/KIF20A/KIF26B/TUBA3D/KIF22/KIF23/KIF5A/KIF11/TUBB4A/KIF15/TUBA1C/KIF4A/KIF9/TUBB2B/KIF18A/TUBA1A/KIF12/RACGAP1/CENPE
REACTOME_ACTIVATION_OF_THE_MRNA_UPON_BINDING_OF_THE_CAP_BINDING_COMPLEX_AND_EIFS_AND_SUBSEQUENT_BINDING_TO_43S	REACTOME_ACTIVATION_OF_THE_MRNA_UPON_BINDING_OF_THE_CAP_BINDING_COMPLEX_AND_EIFS_AND_SUBSEQUENT_BINDING_TO_43S	60	0.647393	2.11891	0.00135135	0.0449944	0.0333012	8096	tags=73%, list=23%, signal=57%	RPS4Y2/EIF4EBP1/RPS27/RPS21/RPS15/RPS20/RPSA/RPS19/RPS2/RPS28/RPS24/RPS10/RPS6/RPS18/RPS16/RPS14/RPS11/EIF3B/RPS9/RPS8/RPS3/RPS5/RPS26/RPS7/RPS17/FAU/RPS12/RPS27A/EIF3K/EIF3E/EIF3G/RPS23/RPS15A/RPS13/EIF2S2/PABPC1/EIF3I/RPS3A/EIF3M/EIF3D/RPS29/EIF3H/RPS25/RPS4Y1
REACTOME_RRNA_MODIFICATION_IN_THE_NUCLEUS_AND_CYTOSOL	REACTOME_RRNA_MODIFICATION_IN_THE_NUCLEUS_AND_CYTOSOL	60	0.529588	1.73334	0.0027027	0.0449944	0.0333012	8454	tags=50%, list=24%, signal=38%	FBL/RPS2/RRP9/DCAF13/RRP7A/NOP56/RPS6/EMG1/RPS14/TRMT112/RPS9/SNU13/NOC4L/RPS7/WDR46/DDX49/NOP10/NOP2/NOP58/TSR3/GAR1/NHP2/IMP4/BUD23/RRP36/DHX37/WDR75/IMP3/UTP14A/UTP11
REACTOME_METABOLISM_OF_POLYAMINES	REACTOME_METABOLISM_OF_POLYAMINES	59	0.535519	1.74934	0.00270636	0.0449944	0.0333012	10262	tags=53%, list=29%, signal=38%	NQO1/PSMD4/PSMB4/SRM/OAZ3/PSMB3/OAZ1/SMOX/SEM1/PSMB6/PSMB9/PSMB8/PSME2/PSMB1/PSMD13/PSMB7/PSMC4/SMS/PSMC5/PSMC3/PSMD14/PSMA4/PSMB2/PSMB5/PSMA7/PSMD8/PSMA3/PSMA5/PSMA1/PSMB11/PSMA2
PID_FAK_PATHWAY	PID_FAK_PATHWAY	59	-0.453558	-1.71405	0.00380228	0.0449944	0.0333012	8570	tags=46%, list=24%, signal=35%	PLCG1/MAPK8/ROCK2/BRAF/YES1/MAPK1/ITGAV/RAPGEF1/RAP1B/ARHGAP35/NCK1/MAP2K1/ARHGAP26/GIT2/DOCK1/SOS1/WASL/PIK3CA/CCND1/FYN/PTPN21/BMX/RASA1/ETS1/KLF8/ITGB1/PIK3R1
REACTOME_ARACHIDONIC_ACID_METABOLISM	REACTOME_ARACHIDONIC_ACID_METABOLISM	59	-0.516433	-1.95166	0.00380228	0.0449944	0.0333012	3898	tags=41%, list=11%, signal=36%	ALOX12/CYP4F8/PON1/CYP1A1/PLA2G4A/HPGD/CYP2J2/CYP1B1/PON3/CYP2U1/CYP4F3/ALOX15/CYP4A11/CYP2C9/CYP4B1/CYP4F2/EPHX2/CYP8B1/CYP4A22/CYP2C19/CYP2C8/PTGS2/PTGIS/CYP1A2
REACTOME_NON_INTEGRIN_MEMBRANE_ECM_INTERACTIONS	REACTOME_NON_INTEGRIN_MEMBRANE_ECM_INTERACTIONS	59	-0.621782	-2.34979	0.00380228	0.0449944	0.0333012	7423	tags=59%, list=21%, signal=47%	COL5A3/ITGAV/LAMB2/DDR2/TTR/ITGA6/COL1A2/CASK/PRKCA/COL4A2/COL4A6/COL1A1/FN1/COL5A1/ITGA2/TNC/COL4A1/LAMB3/LAMC2/LAMC3/COL3A1/FGF2/ITGB1/DDR1/COL4A3/LAMA3/NRXN1/COL4A4/ITGB3/THBS1/DMD/NTN4/HSPG2/LAMA2/COL10A1
WP_COMPLEMENT_AND_COAGULATION_CASCADES	WP_COMPLEMENT_AND_COAGULATION_CASCADES	58	-0.55758	-2.09798	0.00381679	0.0449944	0.0333012	8520	tags=57%, list=24%, signal=43%	F7/F5/F2/BDKRB1/C9/CLTC/SERPING1/C3/F13B/F3/CPB2/C1R/SERPINA5/SERPIND1/CFI/LMAN1/F12/C4B/C1S/KNG1/PROS1/PLAT/F2R/CR1/VWF/KLKB1/THBD/F8/F9/MASP1/PLG/C6/C7
PID_SHP2_PATHWAY	PID_SHP2_PATHWAY	57	-0.500347	-1.88372	0.00367647	0.0449944	0.0333012	6673	tags=42%, list=19%, signal=34%	ARHGAP35/KRAS/NOS3/MAP2K1/AFDN/PDGFRB/NTRK3/SOS1/JAK2/PIK3CA/PTPN11/FRS2/JAK1/IRS1/IL6ST/BDNF/NTF3/GAB1/EGFR/IL2RB/PIK3R1/KDR/NTRK2/TEK
PID_TXA2PATHWAY	PID_TXA2PATHWAY	56	-0.442765	-1.66575	0.00358423	0.0449944	0.0333012	7618	tags=43%, list=21%, signal=34%	PTGIR/YES1/AKT1/GNA13/GNG2/GRK3/PRKCQ/GNB5/PRKCZ/PRKCB/NOS3/GNAQ/PRKCA/FYN/PRKCE/PRKCH/PTGDR/ROCK1/EGFR/VCAM1/GNA14/PIK3CG/SELE/BLK
REACTOME_NEUREXINS_AND_NEUROLIGINS	REACTOME_NEUREXINS_AND_NEUROLIGINS	56	-0.462697	-1.74074	0.00358423	0.0449944	0.0333012	6030	tags=45%, list=17%, signal=37%	STXBP1/SYT1/CASK/NLGN4X/EPB41/HOMER2/SYT7/DLG3/SIPA1L1/GRIN2B/SHANK1/EPB41L5/LRRTM2/NLGN1/PDLIM5/NRXN1/SHANK2/NRXN3/SYT2/DLG2/APBA1/EPB41L1/GRIN2A/DLGAP2/SYT9
REACTOME_AUF1_HNRNP_D0_BINDS_AND_DESTABILIZES_MRNA	REACTOME_AUF1_HNRNP_D0_BINDS_AND_DESTABILIZES_MRNA	55	0.553111	1.78475	0.00277393	0.0449944	0.0333012	10262	tags=55%, list=29%, signal=39%	HSPB1/PSMD4/PSMB4/HSPA1A/PSMB3/SEM1/UBA52/PSMB6/PSMB9/RPS27A/PSMB8/PSME2/PSMB1/PSMD13/PSMB7/PSMC4/PSMC5/PSMC3/PSMD14/PABPC1/PSMA4/PSMB2/PSMB5/PSMA7/PSMD8/PSMA3/PSMA5/PSMA1/PSMB11/PSMA2
KEGG_STEROID_HORMONE_BIOSYNTHESIS	KEGG_STEROID_HORMONE_BIOSYNTHESIS	55	-0.482358	-1.80843	0.00355872	0.0449944	0.0333012	3292	tags=38%, list=9%, signal=35%	CYP7A1/CYP1A1/CYP11A1/CYP1B1/UGT2B15/UGT2B7/SRD5A1/HSD3B2/UGT1A1/HSD17B6/UGT2B10/SULT1E1/UGT2A3/CYP3A43/STS/UGT1A4/UGT1A3/CYP3A4/SRD5A2/AKR1D1/UGT2B17
REACTOME_REGULATION_OF_CHOLESTEROL_BIOSYNTHESIS_BY_SREBP_SREBF_	REACTOME_REGULATION_OF_CHOLESTEROL_BIOSYNTHESIS_BY_SREBP_SREBF_	55	-0.45512	-1.70631	0.00355872	0.0449944	0.0333012	9688	tags=64%, list=27%, signal=46%	NCOA6/NFYB/RXRA/MTF1/LSS/CARM1/DHCR7/FASN/SP1/NCOA2/SCD/MED1/HMGCR/GPAM/MBTPS1/SAR1B/INSIG2/ELOVL6/NCOA1/HELZ2/SEC24B/TBL1X/INSIG1/CREBBP/MBTPS2/SEC24D/PPARA/SEC24A/HMGCS1/SC5D/SEC23A/ACACB/CHD9/SEC24C/CYP51A1
KEGG_ARGININE_AND_PROLINE_METABOLISM	KEGG_ARGININE_AND_PROLINE_METABOLISM	54	-0.469884	-1.75985	0.00362319	0.0449944	0.0333012	7837	tags=59%, list=22%, signal=46%	AZIN2/ALDH3A2/ACY1/ARG2/GLUD1/ASL/PRODH2/GLUL/NOS3/GLUD2/ALDH7A1/MAOA/GOT2/ALDH2/ARG1/ALDH1B1/AGMAT/LAP3/MAOB/P4HA3/DAO/ASS1/OAT/CPS1/NOS2/OTC/GATM/CKMT2/AOC1/PRODH/NOS1/GLS2
REACTOME_G_PROTEIN_MEDIATED_EVENTS	REACTOME_G_PROTEIN_MEDIATED_EVENTS	54	-0.490373	-1.83658	0.00362319	0.0449944	0.0333012	8718	tags=56%, list=24%, signal=42%	CAMKK2/ADCY5/GNAI3/PRKAR2A/CREB1/PRKACB/ADCY4/MAPK1/ADCY6/AHCYL1/ITPR3/PRKAR1A/ADCY3/PLCB4/PDE1A/GNAT3/PRKCA/CAMK2D/ADCY7/ADCY9/PLA2G4A/CAMK4/ITPR2/ITPR1/NBEA/GNAT1/CAMK2B/ADCY1/PDE1C/GNAO1
WP_COPPER_HOMEOSTASIS	WP_COPPER_HOMEOSTASIS	53	-0.500367	-1.84829	0.00367647	0.0449944	0.0333012	9119	tags=64%, list=25%, signal=48%	MT1E/MTF1/SCO1/SLC11A2/GSK3B/PTEN/XIAP/ADAM9/AKT1/COX11/SP1/ATP7A/ADAM10/MT1A/MDM2/ADAM17/APP/MT2A/PIK3CA/CCND1/STEAP2/APC/SLC31A1/STEAP3/BACE1/FOXO1/ATP7B/STEAP4/SLC31A2/XAF1/MT1JP/MT1F/MT1H/MT1G
WP_OXIDATIVE_PHOSPHORYLATION	WP_OXIDATIVE_PHOSPHORYLATION	52	0.613226	1.97094	0.00137174	0.0449944	0.0333012	10910	tags=75%, list=30%, signal=52%	NDUFA4L2/NDUFB9/NDUFA3/ATP5MC1/NDUFA7/NDUFB7/NDUFS6/GZMB/ATP5MF/NDUFA11/ATP5ME/ATP5F1D/NDUFS5/NDUFA2/NDUFS8/ATP5F1E/ATP5MC2/NDUFB8/NDUFA8/NDUFV2/NDUFA6/ATP5PD/NDUFB4/NDUFB10/ATP5MG/NDUFB1/NDUFS2/ATP6AP1/NDUFS7/NDUFC1/NDUFA9/ATP5PO/NDUFB2/NDUFV3/NDUFAB1/NDUFS4/NDUFB6/NDUFS3/NDUFA4
BIOCARTA_PPARA_PATHWAY	BIOCARTA_PPARA_PATHWAY	52	-0.491123	-1.80368	0.003663	0.0449944	0.0333012	8164	tags=56%, list=23%, signal=43%	PRKAR2A/PRKACB/MAPK1/SP1/PRKAR1A/MED1/PRKCB/TNF/STAT5B/RB1/LPL/NCOA1/PRKCA/CITED2/CREBBP/PIK3CA/PPARGC1A/EP300/HSD17B4/NCOR1/PPARA/DUSP1/NRIP1/PIK3R1/NOS2/ACOX1/PIK3CG/EHHADH/PTGS2
KEGG_STARCH_AND_SUCROSE_METABOLISM	KEGG_STARCH_AND_SUCROSE_METABOLISM	52	-0.534784	-1.96402	0.003663	0.0449944	0.0333012	3512	tags=37%, list=10%, signal=33%	ENPP1/UGP2/PGM2/PYGL/PGM1/UGT2B15/UGT2B7/G6PC/UGT1A1/AGL/UGT2B10/UGT2A3/TREH/UGT1A4/UGT1A3/GYS2/UGT2B17/GBA3/SI
WP_NETRINUNC5B_SIGNALING_PATHWAY	WP_NETRINUNC5B_SIGNALING_PATHWAY	52	-0.512296	-1.88144	0.003663	0.0449944	0.0333012	6015	tags=46%, list=17%, signal=38%	MAP2K1/TNF/PRKCA/RLF/PPP2R1B/COL1A1/ROBO4/CCN2/PIK3CA/PTPN11/YAP1/FYN/PTK2B/IL10/NEO1/ARHGEF12/CDH5/CCL2/DAPK1/VCAM1/NTN3/KDR/NTN4/SELE
REACTOME_MRNA_SPLICING_MINOR_PATHWAY	REACTOME_MRNA_SPLICING_MINOR_PATHWAY	52	0.530161	1.70397	0.00548697	0.0494798	0.0366209	10991	tags=62%, list=31%, signal=43%	SNRPD2/SNRPE/SNRPF/SF3B4/SNRPB/POLR2J/POLR2I/SNRNP35/SNRPD1/SF3B5/POLR2H/SNU13/POLR2K/SNRPG/TXNL4A/LSM2/POLR2L/ZMAT5/SNRNP25/PRPF6/POLR2G/POLR2F/SNRPD3/GTF2F2/ZRSR2/YBX1/SF3B6/NCBP2/SRSF1/SRSF7/POLR2E/SRSF2
KEGG_DRUG_METABOLISM_OTHER_ENZYMES	KEGG_DRUG_METABOLISM_OTHER_ENZYMES	51	-0.57504	-2.10159	0.00369004	0.0449944	0.0333012	2739	tags=41%, list=8%, signal=38%	UPB1/CES5A/NAT1/DPYS/UGT2B15/UGT2B7/DPYD/UGT1A1/UGT2B10/UGT2A3/CYP3A43/UGT1A4/UGT1A3/CYP3A4/CYP2A6/XDH/UGT2B17/NAT2/UPP2/CYP2A7/CYP2A13
WP_MITOCHONDRIAL_COMPLEX_I_ASSEMBLY_MODEL_OXPHOS_SYSTEM	WP_MITOCHONDRIAL_COMPLEX_I_ASSEMBLY_MODEL_OXPHOS_SYSTEM	50	0.569342	1.82465	0.00136986	0.0449944	0.0333012	10961	tags=68%, list=31%, signal=47%	NDUFA13/NDUFB9/NDUFA3/NDUFA7/NDUFB7/NDUFS6/NDUFAF2/NDUFS5/NDUFA2/NDUFA1/NDUFB8/NDUFA8/NDUFAF3/TMEM70/NDUFB11/NDUFV2/NDUFB3/NDUFA6/NDUFAF4/NDUFAF6/NDUFB4/NDUFB10/NDUFB1/NDUFS2/NDUFC1/NDUFA12/NDUFB2/NDUFV3/NDUFAB1/NDUFS4/NDUFB6/NDUFS3/DMAC2/TIMMDC1
REACTOME_NETRIN_1_SIGNALING	REACTOME_NETRIN_1_SIGNALING	50	-0.505668	-1.8372	0.00367647	0.0449944	0.0333012	5457	tags=46%, list=15%, signal=39%	PITPNA/ABLIM3/PRKCQ/NCK1/TRPC6/TRIO/ABLIM1/TRPC3/DOCK1/SLIT3/WASL/PTPN11/FYN/UNC5C/NEO1/SLIT2/TRPC4/MYO10/DSCAM/UNC5A/NTN4/UNC5D/TRPC5
REACTOME_COMPLEX_I_BIOGENESIS	REACTOME_COMPLEX_I_BIOGENESIS	49	0.5948	1.89105	0.00277008	0.0449944	0.0333012	10961	tags=73%, list=31%, signal=51%	NDUFA13/NDUFB9/NDUFA3/NDUFA7/NDUFB7/NDUFS6/NDUFAF2/NDUFA11/NDUFS5/NDUFA2/NDUFA1/NDUFS8/NDUFB8/NDUFA8/NDUFAF3/NDUFB11/NDUFV2/NDUFB3/NDUFA6/NDUFAF4/NDUFAF6/NDUFB4/NDUFB10/NDUFB1/NDUFS2/NDUFS7/NDUFC1/NDUFA12/NDUFA9/NDUFB2/NDUFV3/NDUFAB1/NDUFS4/NDUFB6/NDUFS3/TIMMDC1
PID_ANGIOPOIETIN_RECEPTOR_PATHWAY	PID_ANGIOPOIETIN_RECEPTOR_PATHWAY	49	-0.581665	-2.11012	0.00357143	0.0449944	0.0333012	8660	tags=59%, list=24%, signal=45%	CDKN1A/MAPK8/ELF2/ANGPT1/F2/RPS6KB1/AKT1/MAPK1/ANGPT4/NCK1/NOS3/TNF/STAT5B/NFKB1/MMP2/FN1/PIK3CA/PTPN11/ELF1/FYN/BMX/FOXO1/RASA1/FGF2/ETS1/ITGB1/PIK3R1/PLG/TEK
KEGG_ABC_TRANSPORTERS	KEGG_ABC_TRANSPORTERS	44	-0.512355	-1.83989	0.00331126	0.0449944	0.0333012	3919	tags=39%, list=11%, signal=34%	ABCD3/ABCC11/ABCA1/ABCG5/ABCD2/ABCA12/ABCB4/ABCB1/ABCG2/ABCG8/ABCC6/ABCA9/ABCC9/ABCA6/ABCB11/ABCA8/CFTR
KEGG_VALINE_LEUCINE_AND_ISOLEUCINE_DEGRADATION	KEGG_VALINE_LEUCINE_AND_ISOLEUCINE_DEGRADATION	44	-0.672062	-2.4134	0.00331126	0.0449944	0.0333012	4926	tags=82%, list=14%, signal=71%	HADH/HMGCL/ALDH9A1/HADHA/MCEE/ALDH3A2/PCCB/HIBCH/AUH/ACADS/ALDH7A1/PCCA/ACAD8/DLD/ALDH2/HADHB/MCCC2/ALDH1B1/HIBADH/MCCC1/ACAT1/IVD/HMGCS1/ACAA1/DBT/HMGCS2/AOX1/MMUT/ACADSB/BCKDHB/BCKDHA/ACAA2/ABAT/ACADM/ALDH6A1/EHHADH
REACTOME_BILE_ACID_AND_BILE_SALT_METABOLISM	REACTOME_BILE_ACID_AND_BILE_SALT_METABOLISM	43	-0.627526	-2.24987	0.00331126	0.0449944	0.0333012	5797	tags=60%, list=16%, signal=51%	OSBPL6/SLCO1B3/OSBPL1A/NCOA1/CYP46A1/OSBP/SLC27A2/CYP7B1/HSD17B4/STARD5/CYP7A1/ACOX2/ALB/BAAT/SLC27A5/SCP2/CYP39A1/SLC10A2/SLCO1A2/AMACR/CYP8B1/ABCB11/SLC10A1/SLCO1B1/PTGIS/AKR1D1
REACTOME_SIGNALING_BY_RETINOIC_ACID	REACTOME_SIGNALING_BY_RETINOIC_ACID	43	-0.525243	-1.88315	0.00331126	0.0449944	0.0333012	2440	tags=28%, list=7%, signal=26%	PDK2/ADH1C/CRABP1/CPT1A/ADH1A/ALDH1A3/ALDH8A1/RDH16/RDH5/ADH4/PDK4/CYP26A1
WP_HEDGEHOG_SIGNALING_PATHWAY	WP_HEDGEHOG_SIGNALING_PATHWAY	43	-0.546741	-1.96023	0.00331126	0.0449944	0.0333012	8697	tags=63%, list=24%, signal=48%	SUFU/KIF3A/PRKACB/SMO/SMURF2/CSNK1G1/SPOPL/GRK3/PTCH2/SHH/DHH/CUL3/SMURF1/FBXL17/ARRB1/CDON/BOC/CSNK1A1L/CSNK1G3/CCND1/BCL2/PTCH1/CSNK1A1/GLI2/EVC/GAS1/HHIP
WP_DNA_REPLICATION	WP_DNA_REPLICATION	42	0.613484	1.89468	0.0028777	0.0449944	0.0333012	10391	tags=60%, list=29%, signal=42%	CDT1/ORC6/CDC45/MCM10/UBA52/CDC6/RFC4/MCM5/MCM7/POLD1/ORC1/MCM2/POLA2/GMNN/MCM4/RFC2/POLE2/RPA4/POLD2/CDC7/MCM6/RPA3/PCNA/MCM3/DBF4
KEGG_FATTY_ACID_METABOLISM	KEGG_FATTY_ACID_METABOLISM	42	-0.729248	-2.6125	0.00325733	0.0449944	0.0333012	3947	tags=57%, list=11%, signal=51%	ALDH2/HADHB/ALDH1B1/ACAT1/ACSL5/ACAA1/ACADL/ADH1C/CPT2/ACSL6/ADH6/ACSL1/ACADSB/CPT1A/ADH1A/CYP4A11/ACOX1/ACAA2/ACADM/CYP4A22/EHHADH/ADH4/ADH7/ADH1B
KEGG_TYROSINE_METABOLISM	KEGG_TYROSINE_METABOLISM	42	-0.531357	-1.90357	0.00325733	0.0449944	0.0333012	4393	tags=43%, list=12%, signal=38%	MAOA/GOT2/AOC3/MAOB/TH/ADH1C/ADH6/AOX1/ADH1A/ALDH1A3/TYRP1/GSTZ1/TAT/TYR/ADH4/ADH7/ADH1B/DBH
WP_TRYPTOPHAN_METABOLISM	WP_TRYPTOPHAN_METABOLISM	42	-0.573347	-2.05399	0.00325733	0.0449944	0.0333012	4955	tags=60%, list=14%, signal=51%	CYP2F1/ALDH1A2/OGDH/HAAO/GCDH/CYP4F12/ACMSD/CYP7B1/ALDH2/ACAT1/MAOB/CYP1A1/TDO2/INMT/CYP2J2/CYP1B1/CYP2E1/CYP2C18/AOX1/CAT/AADAT/CYP3A4/AOC1/CYP1A2/CYP2A13
KEGG_TRYPTOPHAN_METABOLISM	KEGG_TRYPTOPHAN_METABOLISM	40	-0.583816	-2.06091	0.00337838	0.0449944	0.0333012	5857	tags=52%, list=16%, signal=44%	GCDH/KMO/ALDH7A1/ACMSD/MAOA/ALDH2/OGDHL/ALDH1B1/ACAT1/MAOB/CYP1A1/TDO2/INMT/CYP1B1/AOX1/CAT/EHHADH/AADAT/AOC1/IDO2/CYP1A2
NABA_BASEMENT_MEMBRANES	NABA_BASEMENT_MEMBRANES	40	-0.587248	-2.07302	0.00337838	0.0449944	0.0333012	6713	tags=57%, list=19%, signal=47%	LAMB2/NID1/COL6A3/NPNT/HMCN1/COL4A2/COL4A6/COL18A1/COL4A1/LAMB3/LAMC2/COL15A1/LAMC3/NID2/COL4A3/LAMA3/COL4A4/NTN3/USH2A/NTN4/HSPG2/COL6A6/LAMA2
REACTOME_MOLECULES_ASSOCIATED_WITH_ELASTIC_FIBRES	REACTOME_MOLECULES_ASSOCIATED_WITH_ELASTIC_FIBRES	38	-0.501523	-1.76535	0.00326797	0.0449944	0.0333012	6422	tags=58%, list=18%, signal=48%	BMP2/TGFB3/MFAP5/BMP4/EMILIN3/LTBP3/EFEMP1/ITGB8/ITGA8/FN1/LTBP1/LTBP4/MFAP4/ELN/ITGB1/FBN1/FBLN5/MFAP3/LTBP2/FBLN2/ITGB3/BMP10
REACTOME_O_GLYCOSYLATION_OF_TSR_DOMAIN_CONTAINING_PROTEINS	REACTOME_O_GLYCOSYLATION_OF_TSR_DOMAIN_CONTAINING_PROTEINS	38	-0.640204	-2.2535	0.00326797	0.0449944	0.0333012	7803	tags=61%, list=22%, signal=47%	B3GLCT/ADAMTS13/ADAMTS4/ADAMTS18/ADAMTS8/ADAMTSL4/ADAMTS15/ADAMTSL1/ADAMTS2/THSD1/ADAMTS12/ADAMTSL2/ADAMTS1/CFP/THSD7A/THBS2/SEMA5A/SPON1/THBS1/ADAMTSL3/THSD7B/THSD4/ADAMTS16
REACTOME_SIGNALING_BY_FGFR1_IN_DISEASE	REACTOME_SIGNALING_BY_FGFR1_IN_DISEASE	37	-0.548402	-1.89533	0.00330033	0.0449944	0.0333012	9326	tags=62%, list=26%, signal=46%	STAT3/NRAS/ZMYM2/BAG4/PLCG1/STAT1/FGF1/KRAS/CNTRL/CUX1/STAT5B/LRRFIP1/SOS1/ERLIN2/PIK3CA/FRS2/GAB1/FGF2/FGF20/MYO18A/PIK3R1/FGF23/FGF5
KEGG_DNA_REPLICATION	KEGG_DNA_REPLICATION	36	0.603526	1.82574	0.00285714	0.0449944	0.0333012	10374	tags=64%, list=29%, signal=45%	RNASEH2A/RFC4/RNASEH2C/MCM5/MCM7/POLD1/POLE4/SSBP1/MCM2/DNA2/RNASEH2B/POLA2/MCM4/RFC2/POLE2/RPA4/POLD2/LIG1/MCM6/FEN1/RPA3/PCNA/MCM3
WP_NUCLEAR_RECEPTORS_IN_LIPID_METABOLISM_AND_TOXICITY	WP_NUCLEAR_RECEPTORS_IN_LIPID_METABOLISM_AND_TOXICITY	35	-0.701221	-2.41634	0.00314465	0.0449944	0.0333012	3919	tags=54%, list=11%, signal=48%	ABCD3/CYP7A1/ABCA1/PPARA/ABCG5/CYP2E1/ABCD2/ABCB4/ABCB1/CYP4A11/CYP2C9/CYP4B1/NR1I2/CYP8B1/ABCB11/CYP3A4/CYP2B6/CYP26A1/CYP1A2
BIOCARTA_NUCLEARRS_PATHWAY	BIOCARTA_NUCLEARRS_PATHWAY	34	-0.698417	-2.37733	0.003125	0.0449944	0.0333012	3919	tags=56%, list=11%, signal=50%	ABCD3/ABCA1/PPARA/ABCG5/CYP2E1/ABCD2/ABCB4/ABCB1/CYP4A11/CYP2C9/CYP4B1/NR1I2/CYP8B1/ABCB11/CYP4A22/CYP3A4/CYP2B6/CYP26A1/CYP1A2
REACTOME_SYNTHESIS_OF_BILE_ACIDS_AND_BILE_SALTS	REACTOME_SYNTHESIS_OF_BILE_ACIDS_AND_BILE_SALTS	34	-0.633178	-2.15526	0.003125	0.0449944	0.0333012	5797	tags=56%, list=16%, signal=47%	OSBPL6/OSBPL1A/NCOA1/CYP46A1/OSBP/SLC27A2/CYP7B1/HSD17B4/CYP7A1/ACOX2/BAAT/SLC27A5/SCP2/CYP39A1/AMACR/CYP8B1/ABCB11/PTGIS/AKR1D1
REACTOME_ACTIVATION_OF_MATRIX_METALLOPROTEINASES	REACTOME_ACTIVATION_OF_MATRIX_METALLOPROTEINASES	33	0.614887	1.80102	0.00294118	0.0449944	0.0333012	4138	tags=39%, list=12%, signal=35%	PRSS1/PRSS2/CTRB2/MMP13/KLK2/CTRB1/CTSV/MMP9/MMP3/MMP1/MMP10/MMP11/TIMP1
REACTOME_ACTIVATION_OF_THE_PRE_REPLICATIVE_COMPLEX	REACTOME_ACTIVATION_OF_THE_PRE_REPLICATIVE_COMPLEX	33	0.640996	1.87749	0.00294118	0.0449944	0.0333012	10391	tags=61%, list=29%, signal=43%	CDT1/ORC6/CDC45/MCM10/CDC6/MCM5/MCM7/ORC1/POLE4/MCM2/POLA2/GMNN/MCM4/POLE2/RPA4/CDC7/MCM6/RPA3/MCM3/DBF4
KEGG_PROPANOATE_METABOLISM	KEGG_PROPANOATE_METABOLISM	33	-0.710505	-2.39088	0.00310559	0.0449944	0.0333012	8239	tags=70%, list=23%, signal=54%	HADHA/MCEE/LDHC/ALDH3A2/PCCB/HIBCH/SUCLA2/ALDH7A1/PCCA/ALDH2/ALDH1B1/MLYCD/ACAT1/ACSS3/SUCLG2/ACACB/MMUT/LDHAL6B/ABAT/ACADM/ALDH6A1/SUCLG2P2/EHHADH
WP_PREGNANE_X_RECEPTOR_PATHWAY	WP_PREGNANE_X_RECEPTOR_PATHWAY	33	-0.685565	-2.30696	0.00310559	0.0449944	0.0333012	2247	tags=55%, list=6%, signal=51%	NCOA1/CYP4F12/ABCC2/PPARGC1A/FOXO1/NRIP1/ABCB1/UGT1A1/CYP2C9/NR1I2/UGT1A4/CYP2C19/SLCO1B1/GSTA2/UGT1A3/CYP3A4/CYP2A6/CYP2B6
REACTOME_COOPERATION_OF_PREFOLDIN_AND_TRIC_CCT_IN_ACTIN_AND_TUBULIN_FOLDING	REACTOME_COOPERATION_OF_PREFOLDIN_AND_TRIC_CCT_IN_ACTIN_AND_TUBULIN_FOLDING	32	0.616453	1.79553	0.00293686	0.0449944	0.0333012	9065	tags=66%, list=25%, signal=49%	TUBA3E/TUBA3C/TUBAL3/TUBA4B/PFDN6/CCT3/PFDN4/TUBA4A/TUBB4B/TUBA3D/PFDN5/TUBB4A/TUBA1C/ACTB/TUBB2B/TUBA1A/CCT6A/CCT5/TUBB2A/CCT7/PFDN1
REACTOME_SEALING_OF_THE_NUCLEAR_ENVELOPE_NE_BY_ESCRT_III	REACTOME_SEALING_OF_THE_NUCLEAR_ENVELOPE_NE_BY_ESCRT_III	32	0.655796	1.91012	0.00293686	0.0449944	0.0333012	7674	tags=56%, list=21%, signal=44%	TUBA3E/TUBA3C/TUBB8/TUBAL3/TUBA4B/TUBA4A/TUBB8B/TUBB4B/CHMP2A/TUBA3D/CHMP4A/TUBB4A/TUBA1C/TUBB2B/CHMP4C/TUBA1A/LEMD2/CHMP4B
WP_CONSTITUTIVE_ANDROSTANE_RECEPTOR_PATHWAY	WP_CONSTITUTIVE_ANDROSTANE_RECEPTOR_PATHWAY	32	-0.701401	-2.34205	0.00311526	0.0449944	0.0333012	7717	tags=69%, list=22%, signal=54%	SULT2A1/SP1/NCOA2/ALAS1/ABCC3/NCOA1/ABCC2/SMC1A/PPARGC1A/FOXO1/ABCB1/CYP4A11/UGT1A1/CYP2C9/UGT1A4/CYP2C19/EHHADH/GSTA2/UGT1A3/CYP3A4/CYP2A6/CYP2B6
KEGG_GLYCINE_SERINE_AND_THREONINE_METABOLISM	KEGG_GLYCINE_SERINE_AND_THREONINE_METABOLISM	31	-0.678787	-2.23973	0.00304878	0.0449944	0.0333012	5453	tags=68%, list=15%, signal=57%	SDS/SRR/ALAS1/AGXT/ALAS2/PIPOX/GLYCTK/CTH/SHMT1/MAOA/AOC3/DLD/MAOB/CBS/GLDC/SARDH/DAO/AGXT2/GATM/DMGDH/BHMT
REACTOME_DOWNSTREAM_SIGNALING_OF_ACTIVATED_FGFR1	REACTOME_DOWNSTREAM_SIGNALING_OF_ACTIVATED_FGFR1	31	-0.580054	-1.91395	0.00304878	0.0449944	0.0333012	4187	tags=42%, list=12%, signal=37%	SOS1/PIK3CA/PTPN11/FLRT2/FRS2/GAB1/FLRT3/FGF2/FGF20/PIK3R1/FGF23/KL/FGF5
REACTOME_GLYOXYLATE_METABOLISM_AND_GLYCINE_DEGRADATION	REACTOME_GLYOXYLATE_METABOLISM_AND_GLYCINE_DEGRADATION	31	-0.601389	-1.98434	0.00304878	0.0449944	0.0333012	7068	tags=58%, list=20%, signal=47%	OGDH/PRODH2/DLST/AGXT/DDO/PXMP2/GRHPR/GOT2/DLD/GLDC/DHTKD1/HOGA1/DAO/DBT/BCKDHB/BCKDHA/AGXT2/HAO1
WP_MITOCHONDRIAL_CIV_ASSEMBLY	WP_MITOCHONDRIAL_CIV_ASSEMBLY	31	0.59712	1.72967	0.00445104	0.0465435	0.0344477	9109	tags=68%, list=25%, signal=51%	COA6/COX6C/COX6B1/PET100/COX4I1/COA3/COX5B/COX17/COX19/COX20/COX6A1/COX7B/COX8A/PET117/COX7A2/PNKD/COX5A/COX7C/SMIM20/COX14/CMC1
REACTOME_DOWNSTREAM_SIGNALING_OF_ACTIVATED_FGFR2	REACTOME_DOWNSTREAM_SIGNALING_OF_ACTIVATED_FGFR2	30	-0.569735	-1.86945	0.00296736	0.0449944	0.0333012	5405	tags=47%, list=15%, signal=40%	FGFR2/FGF16/SOS1/PIK3CA/PTPN11/FRS2/FGF18/GAB1/FGF2/FGF20/PIK3R1/FGF7/FGF23/FGF5
REACTOME_FGFR1_MUTANT_RECEPTOR_ACTIVATION	REACTOME_FGFR1_MUTANT_RECEPTOR_ACTIVATION	30	-0.5773	-1.89427	0.00296736	0.0449944	0.0333012	9326	tags=67%, list=26%, signal=49%	TRIM24/GAB2/FGFR1OP2/STAT3/ZMYM2/BAG4/STAT1/FGF1/CNTRL/CUX1/STAT5B/LRRFIP1/ERLIN2/PIK3CA/FGF2/FGF20/MYO18A/PIK3R1/FGF23/FGF5
REACTOME_LAMININ_INTERACTIONS	REACTOME_LAMININ_INTERACTIONS	30	-0.58527	-1.92043	0.00296736	0.0449944	0.0333012	7340	tags=70%, list=20%, signal=56%	ITGAV/LAMB2/ITGA7/NID1/ITGA6/COL4A2/COL4A6/ITGA1/ITGA2/COL18A1/COL4A1/LAMB3/LAMC2/LAMC3/ITGB1/NID2/COL4A3/LAMA3/COL4A4/HSPG2/LAMA2
KEGG_LINOLEIC_ACID_METABOLISM	KEGG_LINOLEIC_ACID_METABOLISM	29	-0.563939	-1.84504	0.00294118	0.0449944	0.0333012	3535	tags=45%, list=10%, signal=40%	JMJD7-PLA2G4B/PLA2G12A/PLA2G4A/CYP2J2/CYP2E1/CYP2C18/ALOX15/CYP2C9/CYP3A43/CYP2C19/CYP2C8/CYP3A4/CYP1A2
REACTOME_PEROXISOMAL_LIPID_METABOLISM	REACTOME_PEROXISOMAL_LIPID_METABOLISM	29	-0.626179	-2.04867	0.00294118	0.0449944	0.0333012	7054	tags=66%, list=20%, signal=53%	CRAT/PECR/HACL1/NUDT7/ACOT6/SLC27A2/PHYH/ACBD4/CROT/HSD17B4/MLYCD/ACOX2/ACAA1/ACBD5/SCP2/ACOX1/HAO2/AMACR/EHHADH
WP_EICOSANOID_METABOLISM_VIA_LIPO_OXYGENASES_LOX	WP_EICOSANOID_METABOLISM_VIA_LIPO_OXYGENASES_LOX	29	-0.584563	-1.91252	0.00294118	0.0449944	0.0333012	5644	tags=59%, list=16%, signal=49%	CYSLTR2/CYP4F12/FPR2/ALOX12/PPARA/ACOX2/HPGD/ACAA1/CYSLTR1/TRPV1/ALOX15/CYP4A11/ACOX1/LTB4R2/CYP4F2/CYP4A22/EHHADH
REACTOME_ACTIVATION_OF_AMPK_DOWNSTREAM_OF_NMDARS	REACTOME_ACTIVATION_OF_AMPK_DOWNSTREAM_OF_NMDARS	29	0.631689	1.79655	0.00302115	0.0449944	0.0333012	6920	tags=48%, list=19%, signal=39%	TUBA3E/TUBA3C/TUBB8/TUBAL3/TUBA4B/TUBA4A/TUBB8B/TUBB4B/TUBA3D/TUBB4A/TUBA1C/PRKAG3/TUBB2B/TUBA1A
REACTOME_SIGNALING_BY_BMP	REACTOME_SIGNALING_BY_BMP	28	-0.637575	-2.06699	0.00295858	0.0449944	0.0333012	8437	tags=68%, list=24%, signal=52%	UBE2D3/ACVR2A/SMURF2/SMAD4/SKI/BMP2/ZFYVE16/SMURF1/SMAD7/GREM2/SMAD6/SMAD9/AMHR2/BMPR2/CHRDL1/SMAD1/BMPR1B/BMP10/GDF2
REACTOME_SULFUR_AMINO_ACID_METABOLISM	REACTOME_SULFUR_AMINO_ACID_METABOLISM	28	-0.560756	-1.81795	0.00295858	0.0449944	0.0333012	5475	tags=50%, list=15%, signal=42%	MRI1/MTRR/MTR/CTH/CSAD/MAT1A/GOT2/BHMT2/CBS/SUOX/CDO1/GADL1/CBSL/BHMT
REACTOME_SYNDECAN_INTERACTIONS	REACTOME_SYNDECAN_INTERACTIONS	27	-0.643438	-2.06543	0.00291545	0.0449944	0.0333012	8968	tags=70%, list=25%, signal=53%	SDC4/ITGB4/SDC1/COL5A3/ITGAV/ITGA6/COL1A2/CASK/PRKCA/COL1A1/FN1/COL5A1/ITGA2/TNC/COL3A1/FGF2/ITGB1/ITGB3/THBS1
BIOCARTA_TOLL_PATHWAY	BIOCARTA_TOLL_PATHWAY	25	-0.646575	-2.03694	0.00289855	0.0449944	0.0333012	11029	tags=72%, list=31%, signal=50%	TLR7/MAP2K3/MAPK14/ELK1/MAP2K4/MAPK8/CHUK/MAP3K1/EIF2AK2/TRAF6/MAP3K14/MYD88/NFKB1/MAP2K6/PGLYRP1/PPARA/TLR3/FOS
WP_HYPOTHESIZED_PATHWAYS_IN_PATHOGENESIS_OF_CARDIOVASCULAR_DISEASE	WP_HYPOTHESIZED_PATHWAYS_IN_PATHOGENESIS_OF_CARDIOVASCULAR_DISEASE	25	-0.580249	-1.82799	0.00289855	0.0449944	0.0333012	9537	tags=64%, list=27%, signal=47%	AGTR1/TGFBR1/MAPK8/SMAD3/POSTN/SMAD4/MAPK1/RUNX2/NR2C2/ENG/CCN2/LTBP1/TGFBR2/FBN1/TGFBR3/LTBP2
REACTOME_SYNTHESIS_OF_BILE_ACIDS_AND_BILE_SALTS_VIA_7ALPHA_HYDROXYCHOLESTEROL	REACTOME_SYNTHESIS_OF_BILE_ACIDS_AND_BILE_SALTS_VIA_7ALPHA_HYDROXYCHOLESTEROL	24	-0.646093	-2.02865	0.00286533	0.0449944	0.0333012	4341	tags=58%, list=12%, signal=51%	NCOA1/SLC27A2/CYP7B1/HSD17B4/CYP7A1/ACOX2/BAAT/SLC27A5/SCP2/AMACR/CYP8B1/ABCB11/PTGIS/AKR1D1
REACTOME_APC_C_CDC20_MEDIATED_DEGRADATION_OF_CYCLIN_B	REACTOME_APC_C_CDC20_MEDIATED_DEGRADATION_OF_CYCLIN_B	24	0.639835	1.74757	0.00306279	0.0449944	0.0333012	5448	tags=38%, list=15%, signal=32%	UBE2C/UBE2S/CDC20/CDK1/CCNB1/ANAPC11/UBA52/ANAPC7/RPS27A
BIOCARTA_INTRINSIC_PATHWAY	BIOCARTA_INTRINSIC_PATHWAY	23	-0.668492	-2.07748	0.00290698	0.0449944	0.0333012	4857	tags=57%, list=14%, signal=49%	COL4A2/COL4A6/F12/KNG1/COL4A1/PROS1/F2R/KLKB1/COL4A3/F8/F9/COL4A4/F11
REACTOME_PI_3K_CASCADE_FGFR2	REACTOME_PI_3K_CASCADE_FGFR2	23	-0.702997	-2.18471	0.00290698	0.0449944	0.0333012	5405	tags=57%, list=15%, signal=48%	FGFR2/FGF16/PIK3CA/PTPN11/FRS2/FGF18/GAB1/FGF2/FGF20/PIK3R1/FGF7/FGF23/FGF5
REACTOME_XENOBIOTICS	REACTOME_XENOBIOTICS	23	-0.748938	-2.32748	0.00290698	0.0449944	0.0333012	3270	tags=61%, list=9%, signal=55%	CYP1A1/CYP2J2/CYP2E1/CYP2C18/CYP2C9/CYP3A43/CYP2C19/CYP2C8/CYP3A4/CYP2A6/CYP2B6/CYP1A2/CYP2A7/CYP2A13
REACTOME_DIGESTION	REACTOME_DIGESTION	23	0.632739	1.72735	0.00455927	0.0465435	0.0344477	3089	tags=43%, list=9%, signal=40%	CLPS/PNLIP/GUCA2A/CHIA/PNLIPRP3/ALPI/AMY2A/CEL/MGAM/PIR
REACTOME_POST_CHAPERONIN_TUBULIN_FOLDING_PATHWAY	REACTOME_POST_CHAPERONIN_TUBULIN_FOLDING_PATHWAY	22	0.691247	1.85323	0.0015625	0.0449944	0.0333012	6920	tags=59%, list=19%, signal=48%	TUBA3E/TUBA3C/TUBAL3/TUBA4B/ARL2/TUBA4A/TBCB/TUBB4B/TUBA3D/TUBB4A/TUBA1C/TUBB2B/TUBA1A
REACTOME_INTRINSIC_PATHWAY_OF_FIBRIN_CLOT_FORMATION	REACTOME_INTRINSIC_PATHWAY_OF_FIBRIN_CLOT_FORMATION	22	-0.659377	-2.05187	0.00276243	0.0449944	0.0333012	4628	tags=59%, list=13%, signal=51%	PRCP/SERPINA5/SERPIND1/F12/KNG1/PROS1/GP1BA/VWF/KLKB1/F8/F9/F11/GP5
REACTOME_RA_BIOSYNTHESIS_PATHWAY	REACTOME_RA_BIOSYNTHESIS_PATHWAY	22	-0.634769	-1.97529	0.00276243	0.0449944	0.0333012	2314	tags=41%, list=6%, signal=38%	ADH1C/CRABP1/ADH1A/ALDH1A3/ALDH8A1/RDH16/RDH5/ADH4/CYP26A1
WP_VITAMIN_D_IN_INFLAMMATORY_DISEASES	WP_VITAMIN_D_IN_INFLAMMATORY_DISEASES	22	-0.631409	-1.96484	0.00276243	0.0449944	0.0333012	9349	tags=68%, list=26%, signal=50%	MAP2K3/MAPK14/RXRA/IL6/CHUK/SMAD3/SMAD4/PPP3CA/MAP3K1/TNF/NFKB1/MAP2K6/MED14/NR3C1/DUSP1
PID_HEDGEHOG_2PATHWAY	PID_HEDGEHOG_2PATHWAY	22	-0.599728	-1.86625	0.00552486	0.0494798	0.0366209	7790	tags=59%, list=22%, signal=46%	SMO/AKT1/PTCH2/SHH/DHH/CDON/BOC/PIK3CA/PTCH1/GLI2/PIK3R1/GAS1/HHIP
REACTOME_TRANSPORT_OF_CONNEXONS_TO_THE_PLASMA_MEMBRANE	REACTOME_TRANSPORT_OF_CONNEXONS_TO_THE_PLASMA_MEMBRANE	21	0.713549	1.88581	0.00157233	0.0449944	0.0333012	6920	tags=62%, list=19%, signal=50%	TUBA3E/TUBA3C/TUBB8/TUBAL3/TUBA4B/TUBA4A/TUBB8B/TUBB4B/TUBA3D/TUBB4A/TUBA1C/TUBB2B/TUBA1A
REACTOME_BRANCHED_CHAIN_AMINO_ACID_CATABOLISM	REACTOME_BRANCHED_CHAIN_AMINO_ACID_CATABOLISM	21	-0.739277	-2.26949	0.00273224	0.0449944	0.0333012	4136	tags=62%, list=12%, signal=55%	ACAD8/DLD/MCCC2/HIBADH/MCCC1/ACAT1/IVD/PPM1K/DBT/ACADSB/BCKDHB/BCKDHA/ALDH6A1
REACTOME_NITRIC_OXIDE_STIMULATES_GUANYLATE_CYCLASE	REACTOME_NITRIC_OXIDE_STIMULATES_GUANYLATE_CYCLASE	21	-0.657009	-2.01694	0.00273224	0.0449944	0.0333012	6090	tags=67%, list=17%, signal=55%	NOS3/PDE1A/GUCY1B1/GUCY1A1/PRKG1/PDE5A/KCNMA1/ITPR1/GUCY1A2/PDE2A/NOS2/PDE10A/PDE11A/NOS1
REACTOME_PI_3K_CASCADE_FGFR1	REACTOME_PI_3K_CASCADE_FGFR1	21	-0.715669	-2.19702	0.00273224	0.0449944	0.0333012	3844	tags=48%, list=11%, signal=43%	PIK3CA/PTPN11/FRS2/GAB1/FGF2/FGF20/PIK3R1/FGF23/KL/FGF5
WP_15Q133_COPY_NUMBER_VARIATION_SYNDROME	WP_15Q133_COPY_NUMBER_VARIATION_SYNDROME	21	-0.651726	-2.00072	0.00273224	0.0449944	0.0333012	4743	tags=62%, list=13%, signal=54%	KLF13/CREBBP/OTUD7A/MTMR10/FYN/CHRFAM7A/GOLGA8H/CHRNA7/KAT2B/FAN1/GOLGA8K/GPR75/GOLGA8O
WP_TAMOXIFEN_METABOLISM	WP_TAMOXIFEN_METABOLISM	21	-0.690728	-2.12045	0.00273224	0.0449944	0.0333012	4058	tags=71%, list=11%, signal=63%	FMO1/FMO3/CYP1A1/CYP1B1/CYP2E1/UGT2B15/UGT2B7/CYP2C9/SULT1E1/UGT1A4/CYP2C19/CYP2C8/CYP3A4/CYP2A6/CYP1A2
WP_UREA_CYCLE_AND_ASSOCIATED_PATHWAYS	WP_UREA_CYCLE_AND_ASSOCIATED_PATHWAYS	21	-0.623706	-1.9147	0.00273224	0.0449944	0.0333012	7043	tags=62%, list=20%, signal=50%	GLUD1/ASL/GPT/GOT2/ARG1/SLC25A13/ASS1/OAT/CPS1/SLC25A15/NOS2/OTC/GLS2
BIOCARTA_AMI_PATHWAY	BIOCARTA_AMI_PATHWAY	20	-0.641684	-1.93934	0.0026738	0.0449944	0.0333012	4857	tags=50%, list=14%, signal=43%	COL4A2/COL4A6/COL4A1/PROS1/PLAT/F2R/AHSP/COL4A3/COL4A4/PLG
BIOCARTA_GSK3_PATHWAY	BIOCARTA_GSK3_PATHWAY	20	-0.581298	-1.75684	0.00534759	0.0489099	0.0361991	8322	tags=65%, list=23%, signal=50%	GSK3B/AKT1/GJA1/EIF2AK2/CTNNB1/FZD1/MYD88/NFKB1/PIK3CA/CCND1/PDPK1/APC/PIK3R1
REACTOME_SIGNALING_BY_HIPPO	REACTOME_SIGNALING_BY_HIPPO	20	-0.593801	-1.79462	0.00534759	0.0489099	0.0361991	8542	tags=80%, list=24%, signal=61%	STK4/CASP3/WWTR1/NPHP4/MOB1A/WWC1/LATS1/MOB1B/TJP2/AMOT/TJP1/SAV1/YAP1/LATS2/AMOTL2/AMOTL1
WP_IMATINIB_AND_CHRONIC_MYELOID_LEUKEMIA	WP_IMATINIB_AND_CHRONIC_MYELOID_LEUKEMIA	20	-0.584996	-1.76801	0.00534759	0.0489099	0.0361991	6233	tags=40%, list=17%, signal=33%	CDKN1B/SPRED2/PDGFRB/FLT1/GADD45A/ABCB1/ABCG2/KIT
BIOCARTA_PAR1_PATHWAY	BIOCARTA_PAR1_PATHWAY	19	-0.651725	-1.93427	0.00271003	0.0449944	0.0333012	6187	tags=68%, list=17%, signal=57%	F2/GNA13/PRKCB/GNAQ/PRKCA/PPP1R12B/PIK3CA/PTK2B/ROCK1/F2R/PIK3R1/PIK3CG/ADCY1
BIOCARTA_TGFB_PATHWAY	BIOCARTA_TGFB_PATHWAY	19	-0.640861	-1.90203	0.00271003	0.0449944	0.0333012	9004	tags=68%, list=25%, signal=51%	TGFB2/TGFBR1/SMAD3/SMAD4/TGFB3/MAP2K1/SMAD7/ZFYVE9/CREBBP/EP300/APC/TGFBR2/CDH1
REACTOME_BIOSYNTHESIS_OF_SPECIALIZED_PRORESOLVING_MEDIATORS_SPMS_	REACTOME_BIOSYNTHESIS_OF_SPECIALIZED_PRORESOLVING_MEDIATORS_SPMS_	19	-0.781884	-2.32058	0.00271003	0.0449944	0.0333012	3898	tags=58%, list=11%, signal=52%	ALOX12/CYP1A1/HPGD/CYP2E1/ALOX15/CYP2C9/EPHX2/CYP2C8/PTGS2/CYP3A4/CYP1A2
WP_FARNESOID_X_RECEPTOR_PATHWAY	WP_FARNESOID_X_RECEPTOR_PATHWAY	19	-0.624368	-1.85308	0.00271003	0.0449944	0.0333012	3676	tags=58%, list=10%, signal=52%	IRS2/PPARGC1A/CYP7A1/ABCB4/BAAT/SLC27A5/SLCO2B1/CYP8B1/ABCB11/SLC10A1/CYP3A4
BIOCARTA_PTEN_PATHWAY	BIOCARTA_PTEN_PATHWAY	18	-0.631292	-1.84288	0.00266667	0.0449944	0.0333012	7955	tags=67%, list=22%, signal=52%	PTEN/AKT1/MAPK1/CDKN1B/SOS1/PIK3CA/PDPK1/ILK/PDK2/EGFR/ITGB1/PIK3R1
REACTOME_ABC_TRANSPORTERS_IN_LIPID_HOMEOSTASIS	REACTOME_ABC_TRANSPORTERS_IN_LIPID_HOMEOSTASIS	18	-0.621592	-1.81457	0.00266667	0.0449944	0.0333012	5205	tags=67%, list=15%, signal=57%	ABCA5/ABCA2/APOA1/ABCA10/PEX3/ABCD3/ABCG5/ABCD2/ABCA12/ABCG8/ABCA9/ABCA6
REACTOME_PHOSPHOLIPASE_C_MEDIATED_CASCADE_FGFR2	REACTOME_PHOSPHOLIPASE_C_MEDIATED_CASCADE_FGFR2	18	-0.628716	-1.83536	0.00266667	0.0449944	0.0333012	5405	tags=61%, list=15%, signal=52%	FGF10/PLCG1/FGF1/FGFR2/FGF16/FGF18/FGF2/FGF20/FGF7/FGF23/FGF5
REACTOME_PI_3K_CASCADE_FGFR3	REACTOME_PI_3K_CASCADE_FGFR3	18	-0.701515	-2.04788	0.00266667	0.0449944	0.0333012	5076	tags=61%, list=14%, signal=52%	FGF16/PIK3CA/PTPN11/FRS2/FGF18/GAB1/FGF2/FGF20/PIK3R1/FGF23/FGF5
WP_ESTROGEN_METABOLISM	WP_ESTROGEN_METABOLISM	18	-0.698	-2.03762	0.00266667	0.0449944	0.0333012	3480	tags=61%, list=10%, signal=55%	ARSD/CYP1A1/CYP1B1/UGT2B7/UGT1A1/SULT1E1/STS/UGT1A3/CYP3A4/GSTM1/CYP1A2
WP_TGFB_SIGNALING_IN_THYROID_CELLS_FOR_EPITHELIALMESENCHYMAL_TRANSITION	WP_TGFB_SIGNALING_IN_THYROID_CELLS_FOR_EPITHELIALMESENCHYMAL_TRANSITION	18	-0.605486	-1.76755	0.00266667	0.0449944	0.0333012	8283	tags=61%, list=23%, signal=47%	SMAD3/AKT1/SMAD4/MAPK1/RUNX2/CDH6/FN1/TNC/CDH2/CDH16/CDH1
WP_MFAP5_EFFECT_ON_PERMEABILITY_AND_MOTILITY_OF_ENDOTHELIAL_CELLS_VIA_CYTOSKELETON_REARRANGEMENT	WP_MFAP5_EFFECT_ON_PERMEABILITY_AND_MOTILITY_OF_ENDOTHELIAL_CELLS_VIA_CYTOSKELETON_REARRANGEMENT	18	-0.602106	-1.75768	0.00533333	0.0489099	0.0361991	8570	tags=61%, list=24%, signal=47%	PLCG1/CREB1/MAPK1/ITGAV/PRKCQ/MFAP5/LPP/TJP1/ITPR1/ITGB3/MYLK
BIOCARTA_CCR5_PATHWAY	BIOCARTA_CCR5_PATHWAY	17	-0.651762	-1.85368	0.0026455	0.0449944	0.0333012	10443	tags=71%, list=29%, signal=50%	CALM1/MAPK14/CCR5/PLCG1/MAPK8/PRKCB/GNAQ/PRKCA/PTK2B/CCL2/CXCL12/FOS
BIOCARTA_GCR_PATHWAY	BIOCARTA_GCR_PATHWAY	17	-0.649855	-1.84826	0.0026455	0.0449944	0.0333012	7589	tags=59%, list=21%, signal=46%	AKT1/NPPA/NOS3/ADRB2/CORIN/NFKB1/PIK3CA/NR3C1/PIK3R1/PIK3CG
REACTOME_GAB1_SIGNALOSOME	REACTOME_GAB1_SIGNALOSOME	17	-0.698838	-1.98757	0.0026455	0.0449944	0.0333012	3844	tags=47%, list=11%, signal=42%	PIK3CA/PTPN11/AREG/EREG/GAB1/EGFR/TGFA/PIK3R1
REACTOME_SIGNALING_BY_CYTOSOLIC_FGFR1_FUSION_MUTANTS	REACTOME_SIGNALING_BY_CYTOSOLIC_FGFR1_FUSION_MUTANTS	17	-0.660117	-1.87744	0.0026455	0.0449944	0.0333012	10519	tags=76%, list=29%, signal=54%	TRIM24/GAB2/FGFR1OP2/STAT3/ZMYM2/STAT1/CNTRL/CUX1/STAT5B/LRRFIP1/PIK3CA/MYO18A/PIK3R1
WP_ACE_INHIBITOR_PATHWAY	WP_ACE_INHIBITOR_PATHWAY	17	-0.667176	-1.89752	0.0026455	0.0449944	0.0333012	6090	tags=65%, list=17%, signal=54%	ATP6AP2/AGTR1/BDKRB1/NOS3/ACE2/CTSG/KNG1/AGTR2/NR3C2/BDKRB2/CMA1
WP_DRUG_INDUCTION_OF_BILE_ACID_PATHWAY	WP_DRUG_INDUCTION_OF_BILE_ACID_PATHWAY	17	-0.739493	-2.1032	0.0026455	0.0449944	0.0333012	3292	tags=71%, list=9%, signal=64%	SULT2A1/NR1H4/ABCC3/ABCC2/CYP7A1/ABCB1/BAAT/NR1I2/ABCB11/SLC10A1/SLCO1B1/CYP3A4
WP_REGULATION_OF_WNTBCATENIN_SIGNALING_BY_SMALL_MOLECULE_COMPOUNDS	WP_REGULATION_OF_WNTBCATENIN_SIGNALING_BY_SMALL_MOLECULE_COMPOUNDS	17	-0.643235	-1.82943	0.0026455	0.0449944	0.0333012	6330	tags=65%, list=18%, signal=53%	LRP1/CTNNB1/FZD1/TNKS/DKK3/TCF4/SFRP4/FZD8/APC/CSNK1A1/MBOAT1
BIOCARTA_IL7_PATHWAY	BIOCARTA_IL7_PATHWAY	16	-0.750483	-2.11478	0.00257732	0.0449944	0.0333012	5810	tags=69%, list=16%, signal=58%	STAT5B/CREBBP/PIK3CA/FYN/EP300/PTK2B/JAK1/BCL2/PIK3R1/IL7R/PIK3CG
KEGG_PRIMARY_BILE_ACID_BIOSYNTHESIS	KEGG_PRIMARY_BILE_ACID_BIOSYNTHESIS	16	-0.766082	-2.15874	0.00257732	0.0449944	0.0333012	5270	tags=75%, list=15%, signal=64%	CYP46A1/CYP7B1/HSD17B4/CYP7A1/ACOX2/BAAT/SLC27A5/SCP2/CYP39A1/AMACR/CYP8B1/AKR1D1
REACTOME_FGFR1_LIGAND_BINDING_AND_ACTIVATION	REACTOME_FGFR1_LIGAND_BINDING_AND_ACTIVATION	16	-0.70894	-1.99772	0.00257732	0.0449944	0.0333012	2234	tags=38%, list=6%, signal=35%	ANOS1/FGF2/FGF20/FGF23/KL/FGF5
REACTOME_PI3K_EVENTS_IN_ERBB2_SIGNALING	REACTOME_PI3K_EVENTS_IN_ERBB2_SIGNALING	16	-0.671139	-1.8912	0.00257732	0.0449944	0.0333012	3844	tags=50%, list=11%, signal=45%	PIK3CA/NRG3/EREG/GAB1/EGFR/ERBB2/PIK3R1/NRG1
REACTOME_RECYCLING_OF_BILE_ACIDS_AND_SALTS	REACTOME_RECYCLING_OF_BILE_ACIDS_AND_SALTS	16	-0.662866	-1.86789	0.00257732	0.0449944	0.0333012	7193	tags=88%, list=20%, signal=70%	NCOA2/NR1H4/ABCC3/SLCO1B3/NCOA1/STARD5/ALB/BAAT/SLC27A5/SLC10A2/SLCO1A2/ABCB11/SLC10A1/SLCO1B1
REACTOME_SYNTHESIS_OF_PIPS_AT_THE_EARLY_ENDOSOME_MEMBRANE	REACTOME_SYNTHESIS_OF_PIPS_AT_THE_EARLY_ENDOSOME_MEMBRANE	16	-0.663168	-1.86874	0.00257732	0.0449944	0.0333012	6049	tags=62%, list=17%, signal=52%	PIK3C3/MTMR4/PI4K2B/MTMR10/MTMR12/PIKFYVE/PIK3R4/MTM1/PIK3C2A/INPP4B
WP_DEREGULATION_OF_RAB_AND_RAB_EFFECTOR_GENES_IN_BLADDER_CANCER	WP_DEREGULATION_OF_RAB_AND_RAB_EFFECTOR_GENES_IN_BLADDER_CANCER	16	-0.717195	-2.02098	0.00257732	0.0449944	0.0333012	4629	tags=44%, list=13%, signal=38%	MYRIP/RAB27B/GCC2/SYTL4/SYTL2/SYTL5/EXPH5
WP_TCA_CYCLE_AND_DEFICIENCY_OF_PYRUVATE_DEHYDROGENASE_COMPLEX_PDHC	WP_TCA_CYCLE_AND_DEFICIENCY_OF_PYRUVATE_DEHYDROGENASE_COMPLEX_PDHC	16	-0.655	-1.84572	0.00257732	0.0449944	0.0333012	8416	tags=69%, list=24%, signal=53%	MDH1/IDH1/OGDH/DLST/SDHA/PC/DLD/ACO1/SUCLG2/IDH3A/PCK1
BIOCARTA_CD40_PATHWAY	BIOCARTA_CD40_PATHWAY	15	-0.660763	-1.84477	0.00253807	0.0449944	0.0333012	6213	tags=67%, list=17%, signal=55%	TRAF3/CD40/CHUK/MAP3K1/TNFAIP3/TRAF6/MAP3K14/NFKB1/CD40LG/DUSP1
PID_ERBB_NETWORK_PATHWAY	PID_ERBB_NETWORK_PATHWAY	15	-0.652831	-1.82263	0.00253807	0.0449944	0.0333012	3260	tags=47%, list=9%, signal=42%	NRG3/AREG/EREG/EGFR/TGFA/ERBB2/NRG1
REACTOME_DEFECTS_OF_CONTACT_ACTIVATION_SYSTEM_CAS_AND_KALLIKREIN_KININ_SYSTEM_KKS_	REACTOME_DEFECTS_OF_CONTACT_ACTIVATION_SYSTEM_CAS_AND_KALLIKREIN_KININ_SYSTEM_KKS_	15	-0.756804	-2.11291	0.00253807	0.0449944	0.0333012	3999	tags=60%, list=11%, signal=53%	F12/GGCX/GP1BA/VWF/KLKB1/F8/F9/F11/GP5
REACTOME_FATTY_ACIDS	REACTOME_FATTY_ACIDS	15	-0.794987	-2.21951	0.00253807	0.0449944	0.0333012	3461	tags=93%, list=10%, signal=84%	CYP2F1/CYP4F11/CYP4F22/CYP4F12/CYP4F8/CYP2J2/CYP4F3/CYP4A11/CYP4B1/CYP4F2/CYP4A22/CYP2B6/CYP2A7/CYP2A13
WP_CYSTEINE_AND_METHIONINE_CATABOLISM	WP_CYSTEINE_AND_METHIONINE_CATABOLISM	15	-0.676337	-1.88825	0.00253807	0.0449944	0.0333012	5475	tags=60%, list=15%, signal=51%	MTR/GCLC/CTH/CSAD/MAT1A/CBS/SUOX/CDO1/BHMT
WP_FATTY_ACID_OMEGA_OXIDATION	WP_FATTY_ACID_OMEGA_OXIDATION	15	-0.859838	-2.40057	0.00253807	0.0449944	0.0333012	3947	tags=87%, list=11%, signal=77%	ALDH2/CYP1A1/ADH1C/CYP2E1/ADH6/ADH1A/CYP4A11/ADH4/ADH7/CYP3A4/CYP2A6/ADH1B/CYP1A2
WP_CODEINE_AND_MORPHINE_METABOLISM	WP_CODEINE_AND_MORPHINE_METABOLISM	15	-0.624182	-1.74264	0.00507614	0.0478331	0.0354021	1965	tags=47%, list=5%, signal=44%	UGT2B7/ABCB1/UGT1A1/CYP2C8/SLCO1B1/UGT1A3/CYP3A4
BIOCARTA_PLATELETAPP_PATHWAY	BIOCARTA_PLATELETAPP_PATHWAY	14	-0.752181	-2.03024	0.00260417	0.0449944	0.0333012	4857	tags=71%, list=14%, signal=62%	COL4A2/APP/COL4A6/COL4A1/PLAT/COL4A3/F9/COL4A4/PLG/F11
PID_IL5_PATHWAY	PID_IL5_PATHWAY	14	-0.779165	-2.10307	0.00260417	0.0449944	0.0333012	5810	tags=57%, list=16%, signal=48%	STAT5B/IL5RA/JAK2/PIK3CA/PTPN11/CSF2RB/CISH/PIK3R1
REACTOME_CARNITINE_METABOLISM	REACTOME_CARNITINE_METABOLISM	14	-0.688939	-1.85954	0.00260417	0.0449944	0.0333012	2309	tags=43%, list=6%, signal=40%	SLC25A20/ACACB/CPT2/CPT1A/PRKAG2/THRSP
REACTOME_PLATELET_ADHESION_TO_EXPOSED_COLLAGEN	REACTOME_PLATELET_ADHESION_TO_EXPOSED_COLLAGEN	14	-0.68972	-1.86165	0.00260417	0.0449944	0.0333012	4656	tags=79%, list=13%, signal=68%	COL1A2/COL1A1/ITGA10/ITGA1/ITGA2/FYN/GP1BA/VWF/ITGB1/GP5/GP6
REACTOME_SYNTHESIS_OF_BILE_ACIDS_AND_BILE_SALTS_VIA_24_HYDROXYCHOLESTEROL	REACTOME_SYNTHESIS_OF_BILE_ACIDS_AND_BILE_SALTS_VIA_24_HYDROXYCHOLESTEROL	14	-0.66788	-1.8027	0.00260417	0.0449944	0.0333012	1533	tags=57%, list=4%, signal=55%	CYP46A1/SLC27A2/SLC27A5/CYP39A1/AMACR/CYP8B1/PTGIS/AKR1D1
BIOCARTA_ACE2_PATHWAY	BIOCARTA_ACE2_PATHWAY	13	-0.686502	-1.84942	0.00257732	0.0449944	0.0333012	6085	tags=62%, list=17%, signal=51%	ACE2/COL4A2/COL4A6/COL4A1/AGTR2/COL4A3/COL4A4/CMA1
WP_ESTROGEN_RECEPTOR_PATHWAY	WP_ESTROGEN_RECEPTOR_PATHWAY	13	-0.771712	-2.07897	0.00257732	0.0449944	0.0333012	3270	tags=62%, list=9%, signal=56%	CYP1A1/PPARA/CYP1B1/ACOX1/PCK1/PDK4/CYP1A2/ESR1
WP_MAMMARY_GLAND_DEVELOPMENT_PATHWAY_PUBERTY_STAGE_2_OF_4	WP_MAMMARY_GLAND_DEVELOPMENT_PATHWAY_PUBERTY_STAGE_2_OF_4	13	-0.685693	-1.84724	0.00257732	0.0449944	0.0333012	4502	tags=54%, list=13%, signal=47%	FN1/CCND1/AREG/NRIP1/ERBB2/PGR/ESR1
WP_VALPROIC_ACID_PATHWAY	WP_VALPROIC_ACID_PATHWAY	13	-0.764036	-2.05829	0.00257732	0.0449944	0.0333012	3927	tags=69%, list=11%, signal=62%	HADHB/IVD/ACADSB/CYP2C9/ABAT/EHHADH/UGT1A3/CYP2A6/CYP2B6
REACTOME_EICOSANOIDS	REACTOME_EICOSANOIDS	12	-0.775825	-2.05562	0.00245098	0.0449944	0.0333012	7132	tags=92%, list=20%, signal=73%	CYP4F11/CYP4F22/CYP4F12/CYP4F8/CYP4F3/CYP4A11/CYP4B1/CYP4F2/CYP8B1/CYP4A22/PTGIS
REACTOME_ETHANOL_OXIDATION	REACTOME_ETHANOL_OXIDATION	12	-0.800267	-2.12038	0.00245098	0.0449944	0.0333012	3947	tags=67%, list=11%, signal=59%	ALDH2/ALDH1B1/ADH1C/ADH6/ADH1A/ADH4/ADH7/ADH1B
BIOCARTA_LECTIN_PATHWAY	BIOCARTA_LECTIN_PATHWAY	12	-0.725606	-1.92256	0.00490196	0.0466705	0.0345416	7775	tags=83%, list=22%, signal=65%	C9/C3/C5/C4A/C4B/MBL2/C8A/MASP1/C6/C7
REACTOME_LYSINE_CATABOLISM	REACTOME_LYSINE_CATABOLISM	12	-0.744196	-1.97182	0.00490196	0.0466705	0.0345416	8379	tags=83%, list=23%, signal=64%	PHYKPL/OGDH/DLST/GCDH/CRYM/PIPOX/ALDH7A1/DLD/AASS/AADAT
WP_BONE_MORPHOGENIC_PROTEIN_BMP_SIGNALLING_AND_REGULATION	WP_BONE_MORPHOGENIC_PROTEIN_BMP_SIGNALLING_AND_REGULATION	12	-0.733318	-1.943	0.00490196	0.0466705	0.0345416	7566	tags=100%, list=21%, signal=79%	NOG/SMAD4/RUNX2/TOB2/BMP2/SMURF1/SMAD6/TOB1/BMPR2/SMAD1/BMPR1B
REACTOME_CYP2E1_REACTIONS	REACTOME_CYP2E1_REACTIONS	11	-0.849187	-2.18469	0.00239234	0.0449944	0.0333012	2138	tags=73%, list=6%, signal=68%	CYP2E1/CYP2C9/CYP2C19/CYP2C8/CYP2A6/CYP2B6/CYP2A7/CYP2A13
WP_METHIONINE_METABOLISM_LEADING_TO_SULPHUR_AMINO_ACIDS_AND_RELATED_DISORDERS	WP_METHIONINE_METABOLISM_LEADING_TO_SULPHUR_AMINO_ACIDS_AND_RELATED_DISORDERS	11	-0.805016	-2.07105	0.00239234	0.0449944	0.0333012	5475	tags=73%, list=15%, signal=62%	MTR/MAT2B/CTH/CSAD/MAT1A/CBS/CDO1/BHMT
WP_REGULATION_OF_ACTIN_CYTOSKELETON	WP_REGULATION_OF_ACTIN_CYTOSKELETON	150	-0.347107	-1.50116	0.00574713	0.0506745	0.0375051	6829	tags=38%, list=19%, signal=31%	BRAF/FGF11/NCKAP1/GNA13/MAPK1/FGF1/FGF12/DIAPH3/ARHGAP35/PIP5K1B/PIK3CB/KRAS/GNG12/MAPK6/PIK3C3/MAP2K1/PPP1R12A/FGFR2/PDGFRB/DIAPH1/FGF16/SSH1/CFL2/FN1/DOCK1/ITGA1/SOS1/CHRM5/PIK3CA/ARHGEF6/IQGAP1/RDX/MAPK4/FGF18/SOS2/APC/PIK3R4/PIK3C2A/MYH10/PAK5/PIK3C2G/ROCK1/F2R/EGFR/FGF2/FGF20/PIK3R1/FGF7/CYFIP2/MYL1/MYLK/PIK3CG/CHRM4/FGF23/BDKRB2/FGF5/CHRM2
PID_INTEGRIN_CS_PATHWAY	PID_INTEGRIN_CS_PATHWAY	26	-0.561283	-1.78677	0.00578035	0.0506745	0.0375051	8403	tags=62%, list=23%, signal=47%	ITGB4/ITGA11/ITGAV/ITGA7/ITGA6/ITGB8/ITGA8/ITGA10/ITGA1/ITGA2/ITGB7/ITGB1/ITGA9/ITGAD/ITGB3/ITGA4
REACTOME_METABOLISM_OF_STEROIDS	REACTOME_METABOLISM_OF_STEROIDS	151	-0.350036	-1.51628	0.00578035	0.0506745	0.0375051	6454	tags=40%, list=18%, signal=33%	MED1/PLPP6/HMGCR/GPAM/STARD4/SERPINA6/MBTPS1/SAR1B/OSBPL6/SLCO1B3/INSIG2/ELOVL6/HSD17B11/OSBPL1A/NCOA1/CYP46A1/CYP11B1/TSPOAP1/HELZ2/SEC24B/TBL1X/OSBP/INSIG1/CREBBP/MBTPS2/SLC27A2/CYP7B1/SEC24D/HSD17B4/STARD5/CYP7A1/PPARA/SEC24A/ACOX2/GC/HMGCS1/CYP11A1/SC5D/ALB/SEC23A/ACACB/CHD9/SEC24C/BAAT/SLC27A5/SRD5A1/HSD3B2/SCP2/CYP39A1/SLC10A2/CYP51A1/SLCO1A2/AMACR/CYP8B1/ABCB11/SLC10A1/SLCO1B1/SRD5A2/PTGIS…
BIOCARTA_NTHI_PATHWAY	BIOCARTA_NTHI_PATHWAY	23	-0.594253	-1.84677	0.00581395	0.0506745	0.0375051	8934	tags=65%, list=25%, signal=49%	TGFBR1/CHUK/SMAD3/IL1B/SMAD4/TNF/MAP3K14/MYD88/NFKB1/CREBBP/MAP2K6/EP300/NR3C1/DUSP1/TGFBR2
REACTOME_FCGAMMA_RECEPTOR_FCGR_DEPENDENT_PHAGOCYTOSIS	REACTOME_FCGAMMA_RECEPTOR_FCGR_DEPENDENT_PHAGOCYTOSIS	143	-0.559643	-2.40413	0.00584795	0.0506745	0.0375051	4686	tags=40%, list=13%, signal=35%	MYO5A/CD3G/IGLV7-43/DOCK1/IGHV1-69/WASL/PLD1/PIK3CA/PLCG2/FYN/IGKV2D-30/IGLV6-57/PRKCE/IGLV1-44/IGLV2-8/IGKV2-28/IGKV1-12/IGHV1-2/IGKV1D-16/IGHV3-13/MYO10/IGLV1-47/IGKV3D-20/IGKV2-30/ITPR2/ITPR1/PLPP4/IGKV1D-39/WASF3/IGHV2-70/IGLV1-40/IGKV1D-33/PIK3R1/IGLV1-51/IGKV1-16/IGHV2-5/IGHV3-11/CYFIP2/IGKV1-33/IGHV4-34/IGLV3-1/IGKV4-1/IGLV3-21/IGKV1-17/IGHV4-59/IGHV3-7/IGLV2-11/IGHV3-30/IGHV3-23/IGLV3-25/…
WP_BRAINDERIVED_NEUROTROPHIC_FACTOR_BDNF_SIGNALING_PATHWAY	WP_BRAINDERIVED_NEUROTROPHIC_FACTOR_BDNF_SIGNALING_PATHWAY	144	-0.349705	-1.50353	0.00584795	0.0506745	0.0375051	6422	tags=37%, list=18%, signal=30%	BMP2/GRIP1/NCK1/MAP3K1/MAP2K1/DLG1/MAP3K2/CYFIP1/PRKAA1/STAT5B/TRAF6/CTNNB1/DOK5/NTRK3/IRS2/MEF2C/ADAM17/NFKB1/NCAM1/PTPRF/CDH2/JAK2/GRIN2B/PTPN11/PDPK1/KIDINS220/DPYSL2/FYN/MTOR/FRS2/BCL2L11/PTK2B/RPS6KA5/EGR1/IRS1/CDKL5/APC/NGFR/BDNF/CAMK4/ACACB/NTF3/RASGRF1/MEF2A/TIAM1/SHC4/PIK3R1/EGR2/FOS/NTRK2/KCNA3/KCNN2/GABRB3
KEGG_HISTIDINE_METABOLISM	KEGG_HISTIDINE_METABOLISM	29	-0.544348	-1.78094	0.00588235	0.0506745	0.0375051	5783	tags=55%, list=16%, signal=46%	HDC/FTCD/HNMT/ACY3/ALDH7A1/MAOA/ALDH2/ALDH1B1/HAL/AMDHD1/MAOB/ALDH1A3/AOC1/UROC1/ASPA/CNDP1
REACTOME_DISEASES_OF_GLYCOSYLATION	REACTOME_DISEASES_OF_GLYCOSYLATION	142	-0.40609	-1.74283	0.00591716	0.0506745	0.0375051	6891	tags=37%, list=19%, signal=30%	ADAMTS4/ADAMTS18/BGN/ADAMTS8/B4GAT1/ADAMTSL4/MUCL1/ADAMTS15/ALG11/CHSY1/GPC4/ADAMTSL1/NOTCH4/ADAMTS2/PRELP/GPC5/THSD1/MUC21/MUC6/ADAMTS12/NOTCH3/MUC16/LARGE1/ADAMTSL2/ADAMTS1/NCAN/PAPSS2/CFP/NOTCH2/MUC5B/PGM1/VCAN/GNE/THSD7A/LUM/GALNT12/MUC3A/GALNT3/THBS2/SEMA5A/MGAT2/SPON1/THBS1/ADAMTSL3/HSPG2/MUC5AC/THSD7B/DCN/THSD4/OMD/OGN/ADAMTS16
KEGG_CALCIUM_SIGNALING_PATHWAY	KEGG_CALCIUM_SIGNALING_PATHWAY	177	-0.353981	-1.59645	0.00598802	0.0506745	0.0375051	6253	tags=35%, list=17%, signal=29%	SPHK2/PHKB/PRKCB/NOS3/PLCB4/PDE1A/ADRB2/GNAQ/CYSLTR2/PDGFRB/P2RX1/PRKCA/NTSR1/CAMK2D/CALML3/EDNRA/SLC8A1/CHRM5/CACNA1H/CHP1/PTGFR/ADCY7/PLCG2/PLN/ADCY9/PTK2B/EDNRB/OXTR/CHRNA7/HTR7/CYSLTR1/CACNA1C/CAMK4/F2R/SLC8A3/HTR2B/EGFR/PHKA1/HTR4/ITPR2/ITPR1/ERBB2/NOS2/P2RX3/CAMK2B/LTB4R2/HRH2/GNA14/ADRA1B/AVPR1A/MYLK/GRPR/ADCY1/BDKRB2/PDE1C/GRIN2A/DRD1/NOS1/ADRA1A/CHP2/CHRM2/P2RX2
REACTOME_DISORDERS_OF_TRANSMEMBRANE_TRANSPORTERS	REACTOME_DISORDERS_OF_TRANSMEMBRANE_TRANSPORTERS	176	-0.310859	-1.39836	0.00598802	0.0506745	0.0375051	3244	tags=27%, list=9%, signal=24%	SLCO1B3/AVPR2/PSMC1/NUP160/SLC2A10/NUP153/ABCC2/GCKR/HEPH/ERLIN1/ERLIN2/SLC24A4/POM121/SLC16A1/ABCA1/SLC40A1/SEL1L/SLC35A3/SLC12A6/ABCG5/SLC2A9/SLC17A8/SLC5A2/SLC34A1/ABCA12/CP/ABCB4/ABCG8/SLC6A2/SLC24A1/ABCC6/SLCO2A1/SLC1A1/ABCC9/AVPR1A/SLC2A2/SLC12A1/ABCB11/SLCO1B1/SLC34A2/SLC6A20/SLC4A4/RHAG/SLC4A1/SLC3A1/SLC5A1/CFTR
REACTOME_FATTY_ACID_METABOLISM	REACTOME_FATTY_ACID_METABOLISM	177	-0.472764	-2.13216	0.00598802	0.0506745	0.0375051	4973	tags=37%, list=14%, signal=32%	SLC25A20/ELOVL5/ACOT6/PCCA/SLC27A2/PHYH/ACBD4/HADHB/ALOX12/CROT/HSD17B4/MLYCD/CYP4F8/PON1/ACOT2/CYP1A1/ACOX2/ACSL5/HACD2/PLA2G4A/HPGD/CYP2J2/HTD2/CYP1B1/ACAA1/ACADL/PON3/CYP2U1/ACACB/ELOVL7/ACBD5/CPT2/ACSL6/CBR4/CYP4F3/ACSL1/MMUT/ALOX15/CPT1A/SCP2/CYP4A11/PRKAG2/CYP2C9/ACOX1/ACAA2/CYP4B1/ACADM/CYP4F2/EPHX2/SCD5/HAO2/AMACR/CYP8B1/CYP4A22/ACOT12/CYP2C19/EHHADH/TECRL/CYP2C8/PTGS2/THRSP/ACSM3/ACAD11/…
REACTOME_SIGNALING_BY_THE_B_CELL_RECEPTOR_BCR_	REACTOME_SIGNALING_BY_THE_B_CELL_RECEPTOR_BCR_	166	-0.496941	-2.21623	0.00598802	0.0506745	0.0375051	4187	tags=33%, list=12%, signal=29%	NFKB1/IGLV7-43/SOS1/IGHV1-69/DAPP1/PLCG2/FYN/IGKV2D-30/IGLV6-57/NFATC3/IGLV1-44/IGLV2-8/IGKV2-28/RASGRP1/IGKV1-12/IGHV1-2/IGKV1D-16/IGHV3-13/REL/IGLV1-47/IGKV3D-20/IGKV2-30/ITPR2/ITPR1/IGKV1D-39/IGHD/IGHV2-70/IGLV1-40/IGKV1D-33/PIK3R1/IGLV1-51/IGKV1-16/IGHV2-5/IGHV3-11/IGKV1-33/IGHV4-34/IGLV3-1/IGKV4-1/IGLV3-21/IGKV1-17/IGHV4-59/IGHV3-7/IGLV2-11/IGHV3-30/IGHV3-23/BLK/IGLV3-25/IGLV2-14/IGHV4-39/IG…
WP_BREAST_CANCER_PATHWAY	WP_BREAST_CANCER_PATHWAY	154	-0.341986	-1.49556	0.00598802	0.0506745	0.0375051	5667	tags=34%, list=16%, signal=29%	MAP2K1/HEY2/WNT16/CTNNB1/RB1/GADD45B/NCOA1/FZD1/RAD50/FGF16/FLT4/NOTCH4/WNT11/CDK6/CSNK1A1L/AKT3/SOS1/ATM/PIK3CA/CCND1/LRP5/MTOR/NOTCH3/POLK/DDB2/SFRP4/FZD8/FGF18/SOS2/APC/CSNK1A1/CSNK2A3/NOTCH2/EGFR/FGF2/GADD45A/LRP6/FGF20/ERBB2/SHC4/PIK3R1/KIT/PGR/FGF7/WNT5B/FOS/FGF23/TNFSF11/WNT2/FGF5/ESR1/WNT7A
REACTOME_INCRETIN_SYNTHESIS_SECRETION_AND_INACTIVATION	REACTOME_INCRETIN_SYNTHESIS_SECRETION_AND_INACTIVATION	23	0.630471	1.72116	0.00607903	0.0511893	0.0378861	5514	tags=48%, list=15%, signal=40%	GCG/CDX2/GIP/LEP/ISL1/FFAR1/GNG13/PAX6/GNB3/PCSK1/GPR119
WP_EGFEGFR_SIGNALING_PATHWAY	WP_EGFEGFR_SIGNALING_PATHWAY	161	-0.347086	-1.53097	0.00609756	0.0511893	0.0378861	8570	tags=45%, list=24%, signal=35%	PLCG1/MAPK8/STAT1/ARF6/PLCE1/CBLB/ATF1/RALB/RPS6KB1/CREB1/PTEN/RALBP1/CAV1/BRAF/GRB10/AKT1/MAPK1/EPS15/SP1/STAM2/USP6NL/FOXO4/CBL/ERRFI1/GJA1/KRAS/RICTOR/NCK1/MAP3K1/PRKCZ/PRKCB/MAP3K3/NOS3/STXBP1/SPRY2/MAP2K1/MAP3K2/STAT5B/PRKCA/USP8/MEF2C/PXDN/SOS1/PLD1/JAK2/PTPN11/PDPK1/CAV2/IQGAP1/MTOR/MAPK4/PLSCR1/REPS2/PTK2B/RPS6KA5/JAK1/ITCH/SOS2/SYNJ1/NEDD4/EPS8/GAB1/FOXO1/ROCK1/MEF2A/EGFR/RASA1/RPS6KA2/E…
REACTOME_FC_EPSILON_RECEPTOR_FCERI_SIGNALING	REACTOME_FC_EPSILON_RECEPTOR_FCERI_SIGNALING	186	-0.481264	-2.19042	0.00613497	0.0511893	0.0378861	6886	tags=40%, list=19%, signal=33%	ITPR3/PPP3CA/PRKCQ/PIK3CB/KRAS/IGLC3/MS4A2/MAP3K1/IGKV2D-40/IGKV1D-12/GRAP2/TRAF6/FBXW11/PSMC1/RASGRP2/TEC/IGKV1-39/NFKB1/IGLV7-43/SOS1/TAB2/TAB3/IGHV1-69/PIK3CA/PLCG2/PDPK1/FYN/IGKV2D-30/IGLV6-57/NFATC3/IGLV1-44/IGLV2-8/IGKV2-28/RASGRP1/IGKV1-12/FCER1A/TXK/IGHV1-2/IGKV1D-16/IGHV3-13/ITK/IGLV1-47/IGKV3D-20/IGKV2-30/ITPR2/ITPR1/IGKV1D-39/IGHV2-70/IGLV1-40/IGKV1D-33/PIK3R1/IGLV1-51/IGKV1-16/IGHV2-5…
REACTOME_IMMUNOREGULATORY_INTERACTIONS_BETWEEN_A_LYMPHOID_AND_A_NON_LYMPHOID_CELL	REACTOME_IMMUNOREGULATORY_INTERACTIONS_BETWEEN_A_LYMPHOID_AND_A_NON_LYMPHOID_CELL	186	-0.53697	-2.44396	0.00613497	0.0511893	0.0378861	4919	tags=41%, list=14%, signal=35%	IGKV1-39/LILRA4/CXADR/SLAMF6/CD3G/COL1A1/NCR1/IGLV7-43/CD300LD/CD1D/IGHV1-69/CD1A/SIGLEC8/CD160/CD40LG/IGKV2D-30/IGLV6-57/CD200R1/SH2D1B/KLRK1/IGLV1-44/TRAV19/KLRF1/IGLV2-8/IGKV2-28/KLRD1/ICAM3/IGKV1-12/IGHV1-2/LILRB5/ULBP3/IGKV1D-16/TRAV8-4/COL3A1/IGHV3-13/IGLV1-47/IGKV3D-20/IGKV2-30/ITGB7/ITGB1/IGKV1D-39/IGHV2-70/IGLV1-40/CDH1/IGKV1D-33/IGLV1-51/TRAV29DV5/CD226/IGKV1-16/VCAM1/IGHV2-5/IGHV3-11/N…
WP_CILIOPATHIES	WP_CILIOPATHIES	181	-0.309314	-1.40321	0.00617284	0.0513252	0.0379867	8846	tags=39%, list=25%, signal=30%	INVS/RSPH4A/SUFU/TTLL5/TRAF3IP1/NPHP4/KIAA0586/TTC21B/CRX/DNAAF2/CSPP1/C2CD3/CEP290/TUB/SMO/WDR19/IFT81/WDR35/DNAI2/DNAL1/IFT140/ADCY6/TTBK2/BBS9/DNAAF3/CEP104/TBC1D32/ARL13B/RSPH3/TMEM17/NEK9/GALNT11/LCA5/CCDC103/BBS4/BBS1/C8orf37/TOPORS/DNAH11/POC1B/TTC8/FAM161A/DNAI1/RP2/LZTFL1/BBS2/WDR60/DCDC2/TAPT1/CPLANE1/USP9X/TMEM231/BBS10/CEP120/PKD2/PIK3R4/NEK1/RAB23/WDPCP/RP1L1/AK7/ZNF423/GLI2/ARL2BP/D…
REACTOME_CELL_SURFACE_INTERACTIONS_AT_THE_VASCULAR_WALL	REACTOME_CELL_SURFACE_INTERACTIONS_AT_THE_VASCULAR_WALL	194	-0.485257	-2.23163	0.00625	0.0515723	0.0381696	4919	tags=38%, list=14%, signal=33%	IGKV1-39/CXADR/TNFRSF10D/COL1A1/MERTK/FN1/IGLV7-43/SOS1/IGHV1-69/SLC16A1/PIK3CA/PTPN11/FYN/IGKV2D-30/IGLV6-57/MAG/PROS1/IGLV1-44/IGLV2-8/IGKV2-28/IGKV1-12/APOB/IGHV1-2/IGKV1D-16/IGHV3-13/IGLV1-47/IGKV3D-20/IGKV2-30/IGHA2/ITGB1/IGKV1D-39/IGHV2-70/IGLV1-40/IGHA1/IGKV1D-33/THBD/PIK3R1/IGLV1-51/PSG3/SLC16A8/IGKV1-16/IGHV2-5/IGHV3-11/SELP/IGKV1-33/IGHV4-34/IGLV3-1/JCHAIN/ITGB3/IGKV4-1/IGLV3-21/IGKV1-1…
WP_EPITHELIAL_TO_MESENCHYMAL_TRANSITION_IN_COLORECTAL_CANCER	WP_EPITHELIAL_TO_MESENCHYMAL_TRANSITION_IN_COLORECTAL_CANCER	159	-0.369243	-1.62074	0.00625	0.0515723	0.0381696	7763	tags=46%, list=22%, signal=36%	PKP1/CLDN2/SPARC/TUSC3/AKT1/SMAD4/MAPK1/WNT3/CLDN6/HIF1A/FZD5/DLL1/FZD3/PIK3CB/KRAS/TGFB3/CLDN14/MAP2K1/TRAF6/WNT16/NR2C2/CTNNB1/NRP2/CLDN12/ID2/CLDN1/FZD1/NOTCH4/DSP/COL4A2/CLDN24/COL4A6/WNT11/MMP2/FN1/AKT3/TJP1/MAP2K6/SOS1/CDH2/PROX1/PIK3CA/LRP5/NOTCH3/NUBPL/ZEB1/MPP5/COL4A1/FZD4/LATS2/FZD8/SOS2/CLDN19/TWIST2/ZEB2/NOTCH2/TGFBR2/PKP2/LRP6/CLDN20/CDH1/PIK3R1/COL4A3/OCLN/WNT5B/CLDN10/COL4A4/TMPRSS…
WP_METAPATHWAY_BIOTRANSFORMATION_PHASE_I_AND_II	WP_METAPATHWAY_BIOTRANSFORMATION_PHASE_I_AND_II	184	-0.479082	-2.18005	0.00628931	0.0515723	0.0381696	4381	tags=39%, list=12%, signal=34%	SULT1C4/NDST1/CYP7B1/FMO3/HS3ST3A1/NAA30/GSTCD/SULT4A1/CYP4F8/GSTA5/CYP7A1/CYP1A1/FMO4/CYP4Z1/INMT/GSTT2B/CYP11A1/CYP27C1/CYP2J2/CYP1B1/HS3ST1/CYP2U1/CYP2E1/HS6ST3/UGT2B15/CYP2C18/UGT2B7/CYP4F3/CYP4X1/HS3ST2/BAAT/GAL3ST2/CYP39A1/UGT1A1/CYP2C9/CYP51A1/GSTZ1/CYP4B1/SULT1E1/CHST9/CYP4F2/UGT2A3/EPHX2/CYP3A43/CYP4V2/UGT1A4/CYP8B1/CYP2C19/CYP2C8/GSTA2/GLYAT/GLYATL1/FMO2/UGT1A3/CYP3A4/CHST8/CYP2A6/SULT1…
WP_RAS_SIGNALING	WP_RAS_SIGNALING	184	-0.299724	-1.36388	0.00628931	0.0515723	0.0381696	8746	tags=42%, list=24%, signal=32%	PIK3R3/RGL1/PLCG1/RASGRP3/MAPK8/ARF6/PLCE1/CHUK/RALB/RASAL2/NTRK1/PRKACB/RALBP1/GNG7/AKT1/MAPK1/PLA2G4B/FOXO4/EPHA2/GNG2/INSR/ETS2/RAP1B/PIK3CB/GNB5/KRAS/GNG12/RASA2/PRKCB/SYNGAP1/MAP2K1/AFDN/FGFR2/GNG10/PDGFRB/PRKCA/RASGRP2/NF1/FLT4/FLT3/CALML3/NFKB1/AKT3/SOS1/PLD1/GRIN2B/RASGRF2/PIK3CA/PLCG2/PTPN11/FLT1/JMJD7-PLA2G4B/TTBK1/PLA2G12A/MET/SOS2/CALML4/NGFR/RASGRP1/PLA2G4A/HTR7/RASA4B/PAK5/GAB1/RASG…
REACTOME_NEGATIVE_EPIGENETIC_REGULATION_OF_RRNA_EXPRESSION	REACTOME_NEGATIVE_EPIGENETIC_REGULATION_OF_RRNA_EXPRESSION	107	0.461392	1.63655	0.00632911	0.0517204	0.0382792	9884	tags=49%, list=28%, signal=35%	H3C7/H2AC20/H2BC10/H3C11/H3C14/H3C4/H2AC18/H2BC9/H2AX/CD3EAP/H2BU1/ZNRD1/H2AC14/H2AB1/H4C13/H4C11/POLR2H/H4C2/H2AC4/POLR2K/DNMT3B/H4C5/POLR2L/H2AJ/H4C4/H2AC7/H2AC19/POLR1C/GTF2H5/SAP30/H4C14/POLR2F/H4C15/H2AZ1/H4C1/ERCC2/H4C6/H2BC3/TAF1D/CDK7/SAP30BP/HDAC2/SAP18/H2BC14/H2BC17/SUV39H1/H2BC11/H2AC8/HDAC1/TAF1A/POLR1D/H3-3A
NABA_ECM_GLYCOPROTEINS	NABA_ECM_GLYCOPROTEINS	195	-0.407202	-1.87216	0.00636943	0.0518716	0.0383911	6167	tags=45%, list=17%, signal=38%	MFAP5/TSKU/VWA5A/COCH/IGFBP1/SMOC2/EMILIN3/SPARCL1/LTBP3/EFEMP1/CRISPLD1/TGFBI/HMCN1/IBSP/PXDN/SMOC1/ECM1/FNDC8/FN1/TNC/SLIT3/IGFBP5/FGL2/OTOL1/CCN2/LTBP1/MATN2/TECTA/EYS/LTBP4/MMRN2/SRPX/MFAP4/COMP/THBS4/LAMB3/PXDNL/LAMC2/SNED1/CRISPLD2/CRIM1/ZP2/SLIT2/LAMC3/ANOS1/VWA7/CCN1/ELN/RSPO2/NELL2/VWF/DPT/MXRA5/CCN5/NID2/FBN1/ECM2/HMCN2/AEBP1/FBLN5/IGFALS/LGI1/MMRN1/MFAP3/LTBP2/LAMA3/THBS2/FNDC1/NTN3/FB…
BIOCARTA_SM_PATHWAY	BIOCARTA_SM_PATHWAY	14	0.709987	1.73113	0.00647249	0.0524962	0.0388534	8248	tags=86%, list=23%, signal=66%	SNRPD2/SNRPE/SNRPF/SNRPB/SNRPA/SNRPD1/SNRPC/SNRPG/SNRPA1/SNRNP70/SNRPD3/SNRPB2
PID_RAC1_REG_PATHWAY	PID_RAC1_REG_PATHWAY	38	-0.483651	-1.70244	0.00653595	0.0524962	0.0388534	6257	tags=37%, list=17%, signal=30%	PREX1/CHN2/TRIO/DOCK2/DOCK1/SOS1/PREX2/RASGRF2/ARHGEF6/ABR/KALRN/EPS8/RASGRF1/TIAM1
REACTOME_PLATELET_AGGREGATION_PLUG_FORMATION_	REACTOME_PLATELET_AGGREGATION_PLUG_FORMATION_	38	-0.482231	-1.69744	0.00653595	0.0524962	0.0388534	8599	tags=50%, list=24%, signal=38%	FGA/F2/ADRA2B/AKT1/RAP1B/COL1A2/RASGRP2/COL1A1/FN1/SOS1/PDPK1/MPL/RASGRP1/GP1BA/VWF/ADRA2A/RAPGEF4/ITGB3/GP5
REACTOME_NUCLEAR_ENVELOPE_NE_REASSEMBLY	REACTOME_NUCLEAR_ENVELOPE_NE_REASSEMBLY	76	0.504357	1.72046	0.0065703	0.0524962	0.0388534	9321	tags=46%, list=26%, signal=34%	TUBA3E/TUBA3C/TUBB8/TUBAL3/TUBA4B/LMNA/TUBA4A/TUBB8B/CDK1/CCNB1/TUBB4B/CCNB2/BANF1/CHMP2A/TUBA3D/CHMP4A/TUBB4A/RANGAP1/PPP2R1A/TUBA1C/TUBB2B/NUP93/CHMP4C/TUBA1A/LEMD2/UBE2I/RAN/CHMP4B/NUP62/EMD/TUBB2A/NUP43/VPS4A/NUP37/NUP188
WP_FOCAL_ADHESION	WP_FOCAL_ADHESION	198	-0.426601	-1.96146	0.00657895	0.0524962	0.0388534	7955	tags=46%, list=22%, signal=36%	PTEN/ROCK2/XIAP/ITGA11/CAV1/BRAF/AKT1/MAPK1/COL5A3/STYK1/CHAD/ITGAV/LAMB2/FLNB/ITGA7/RAPGEF1/RAP1B/PARVA/ARHGAP35/PIK3CB/BIRC2/ITGA6/PRKCB/COL1A2/MAP2K1/CTNNB1/ITGB8/PPP1R12A/PDGFRB/PRKCA/PPP1R12B/DIAPH1/IBSP/COL4A2/COL4A6/ITGA8/COL1A1/ITGA10/FN1/AKT3/DOCK1/ITGA1/ITGA2/TNC/SOS1/PIK3CA/CCND1/PDPK1/ARHGAP5/CAV2/FYN/PDGFC/FLT1/ILK/COL4A1/BCL2/MET/COMP/THBS4/LAMB3/SRMS/LAMC2/TXK/LAMC3/TESK2/ROCK1/RAS…
PID_AMB2_NEUTROPHILS_PATHWAY	PID_AMB2_NEUTROPHILS_PATHWAY	41	-0.485696	-1.72609	0.00660066	0.0524962	0.0388534	7590	tags=46%, list=21%, signal=37%	YES1/AKT1/RAP1B/LRP1/PRKCZ/TNF/JAM2/NFKB1/MMP2/CCN2/FYN/LPA/APOB/PLAT/ROCK1/MST1R/PLG/SELP/BLK
REACTOME_DAG_AND_IP3_SIGNALING	REACTOME_DAG_AND_IP3_SIGNALING	41	-0.489898	-1.74102	0.00660066	0.0524962	0.0388534	8718	tags=61%, list=24%, signal=46%	CAMKK2/ADCY5/PLCG1/PRKAR2A/CREB1/PRKACB/ADCY4/ADCY6/AHCYL1/ITPR3/PRKAR1A/ADCY3/PDE1A/PRKCA/CAMK2D/ADCY7/ADCY9/PRKCE/CAMK4/ITPR2/ITPR1/NBEA/CAMK2B/ADCY1/PDE1C
WP_PARKINUBIQUITIN_PROTEASOMAL_SYSTEM_PATHWAY	WP_PARKINUBIQUITIN_PROTEASOMAL_SYSTEM_PATHWAY	70	0.495462	1.66218	0.00664894	0.0526689	0.0389812	7945	tags=37%, list=22%, signal=29%	TUBA3E/TUBA3C/TUBB8/TUBAL3/HSPA6/PSMD4/HSPA1A/HSPA1B/TUBA4A/TUBB4B/SEPTIN5/TUBA3D/TUBB4A/UBE2J2/TUBA1C/PSMD13/PSMC4/TUBB2B/PSMC5/PSMC3/TUBA1A/PSMD14/UBE2L3/HSPA4/TUBB/HSPA5
KEGG_FOCAL_ADHESION	KEGG_FOCAL_ADHESION	199	-0.42133	-1.94339	0.00666667	0.0526689	0.0389812	7955	tags=46%, list=22%, signal=36%	PTEN/ROCK2/XIAP/ITGA11/CAV1/BRAF/AKT1/MAPK1/COL5A3/CHAD/ITGAV/LAMB2/FLNB/ITGA7/RAPGEF1/RAP1B/PARVA/ARHGAP35/PIK3CB/COL6A3/BIRC2/ITGA6/PRKCB/COL1A2/MAP2K1/CTNNB1/ITGB8/PPP1R12A/PDGFRB/PRKCA/DIAPH1/IBSP/FLT4/COL4A2/COL4A6/ITGA8/COL1A1/ITGA10/FN1/AKT3/DOCK1/COL5A1/ITGA1/ITGA2/TNC/SOS1/PIK3CA/CCND1/PDPK1/ARHGAP5/CAV2/FYN/PDGFC/FLT1/ILK/COL4A1/BCL2/MET/SOS2/COMP/THBS4/LAMB3/LAMC2/LAMC3/PAK5/ROCK1/RASG…
PID_NFAT_TFPATHWAY	PID_NFAT_TFPATHWAY	45	-0.484353	-1.74136	0.00682594	0.0537486	0.0397803	3900	tags=38%, list=11%, signal=34%	TNF/EGR4/MAF/PTPRK/IKZF1/CD40LG/EGR1/NFATC3/RNF128/GBP3/ITCH/IRF4/EGR2/FOS/PTGS2/FOXP3/EGR3
REACTOME_STABILIZATION_OF_P53	REACTOME_STABILIZATION_OF_P53	57	0.516331	1.67324	0.00684932	0.0537547	0.0397848	10262	tags=54%, list=29%, signal=39%	PSMD4/PSMB4/CDKN2A/PSMB3/SEM1/UBA52/PSMB6/PSMB9/RPS27A/PSMB8/PSME2/PSMB1/PSMD13/PSMB7/PSMC4/COP1/PSMC5/PSMC3/PSMD14/MDM4/PSMA4/PSMB2/PSMB5/PSMA7/CHEK2/PSMD8/PSMA3/PSMA5/PSMA1/PSMB11/PSMA2
KEGG_REGULATION_OF_ACTIN_CYTOSKELETON	KEGG_REGULATION_OF_ACTIN_CYTOSKELETON	213	-0.298318	-1.39891	0.00699301	0.0547019	0.0404858	8488	tags=39%, list=24%, signal=30%	PIK3R5/ARAF/ITGB4/APC2/DIAPH2/F2/BDKRB1/ROCK2/ITGA11/BRAF/FGF11/NCKAP1/GNA13/MAPK1/FGF1/ITGAV/MYH9/ITGA7/FGF12/DIAPH3/ARHGAP35/PIP5K1B/PIK3CB/KRAS/GNG12/ITGA6/MAP2K1/CYFIP1/ITGB8/PPP1R12A/FGFR2/PDGFRB/DIAPH1/FGF16/SSH1/CFL2/ITGA8/PFN3/ITGA10/FN1/DOCK1/ITGA1/ITGA2/SOS1/CHRM5/WASL/PIK3CA/ARHGEF6/IQGAP1/RDX/PDGFC/PIKFYVE/FGF18/SOS2/APC/ARHGEF12/MYH10/PAK5/ROCK1/F2R/EGFR/FGF2/IQGAP2/ITGB7/ITGB1/TIAM1…
WP_NEUROINFLAMMATION	WP_NEUROINFLAMMATION	11	-0.728654	-1.87459	0.00717703	0.0559573	0.041415	3590	tags=73%, list=10%, signal=65%	MAPK14/ASCC1/MAPK8/CHUK/MTOR/TLR4/NOS2/FOS
REACTOME_ABACAVIR_TRANSPORT_AND_METABOLISM	REACTOME_ABACAVIR_TRANSPORT_AND_METABOLISM	10	-0.745539	-1.84294	0.00729927	0.0564042	0.0417457	4127	tags=80%, list=12%, signal=71%	ADAL/NT5C2/ABCB1/ABCG2/ADH1A/PCK1/SLC22A2/SLC22A1
REACTOME_KETONE_BODY_METABOLISM	REACTOME_KETONE_BODY_METABOLISM	10	-0.742192	-1.83466	0.00729927	0.0564042	0.0417457	3928	tags=60%, list=11%, signal=53%	BDH1/BDH2/ACAT1/ACSS3/HMGCS2/HMGCLL1
KEGG_ENDOMETRIAL_CANCER	KEGG_ENDOMETRIAL_CANCER	52	-0.456214	-1.67547	0.00732601	0.0564042	0.0417457	9740	tags=62%, list=27%, signal=45%	FOXO3/AKT2/NRAS/TCF7L2/PIK3R3/PIK3R5/ARAF/GSK3B/APC2/PTEN/BRAF/AKT1/MAPK1/AXIN2/PIK3CB/KRAS/MAP2K1/CTNNB1/AKT3/SOS1/PIK3CA/CCND1/PDPK1/ILK/SOS2/APC/EGFR/ERBB2/CDH1/PIK3R1/PIK3CG/CTNNA3
REACTOME_FGFR1C_LIGAND_BINDING_AND_ACTIVATION	REACTOME_FGFR1C_LIGAND_BINDING_AND_ACTIVATION	12	-0.703868	-1.86496	0.00735294	0.0564042	0.0417457	2234	tags=42%, list=6%, signal=39%	ANOS1/FGF2/FGF20/FGF23/FGF5
REACTOME_SIGNALING_BY_FGFR1	REACTOME_SIGNALING_BY_FGFR1	50	-0.460719	-1.67389	0.00735294	0.0564042	0.0417457	7990	tags=50%, list=22%, signal=39%	SPRED1/FGFRL1/BRAF/MAPK1/FGF1/CBL/KRAS/SPRED2/SPRY2/PPP2CB/SOS1/PIK3CA/PTPN11/FLRT2/FRS2/FGF18/GAB1/ANOS1/FLRT3/FGF2/FGF20/PIK3R1/FGF23/KL/FGF5
PID_TCR_PATHWAY	PID_TCR_PATHWAY	63	-0.420169	-1.61456	0.00740741	0.0566393	0.0419197	10475	tags=54%, list=29%, signal=38%	GAB2/RAP1A/LCK/CD80/MALT1/STIM1/NRAS/PLCG1/CHUK/PTEN/LCP2/AKT1/CBL/PRKCQ/KRAS/NCK1/PRKCB/GRAP2/TRAF6/MAP3K14/PRKCA/RASGRP2/CD3G/CD4/SOS1/CD28/PTPN11/PDPK1/FYN/PRKCE/FYB1/RASGRP1/ITK/PTPRC
REACTOME_BIOLOGICAL_OXIDATIONS	REACTOME_BIOLOGICAL_OXIDATIONS	216	-0.512223	-2.38465	0.00746269	0.0568791	0.0420972	5363	tags=41%, list=15%, signal=35%	NCOA1/MAT2B/ACY3/CYP46A1/CYP11B1/GCLC/FMO1/CYP4F12/CES3/AHR/MAOA/SULT1C4/MAT1A/ACSM2B/AOC3/CYP7B1/FMO3/ALDH2/ALDH1B1/SULT4A1/CYP4F8/UGP2/GSTA5/CYP7A1/AADAC/MAOB/CYP1A1/GSTT2B/CYP11A1/SLC26A1/CMBL/CYP2J2/PAPSS2/CYP1B1/AS3MT/CYP2U1/ADH1C/NAT1/CYP2E1/UGT2B15/ADH6/CYP2C18/UGT2B7/CYP4F3/ADH1A/SLC35D1/CYP4A11/CYP39A1/UGT1A1/CYP2C9/CYP51A1/GSTZ1/ACSM2A/CYP4B1/UGT2B10/SULT1E1/CYP4F2/UGT2A3/ACSM5/CYP3A43/…
REACTOME_RNA_POLYMERASE_I_TRANSCRIPTION	REACTOME_RNA_POLYMERASE_I_TRANSCRIPTION	109	0.452555	1.60835	0.00758534	0.0576292	0.0426524	9884	tags=48%, list=28%, signal=35%	H3C7/H2AC20/H2BC10/H3C11/H3C14/H3C4/H2AC18/H2BC9/H2AX/CD3EAP/H2BU1/ZNRD1/H2AC14/H2AB1/H4C13/H4C11/KAT2A/POLR2H/H4C2/H2AC4/POLR2K/H4C5/POLR2L/H2AJ/H4C4/H2AC7/H2AC19/POLR1C/GTF2H5/MBD3/EHMT2/MAPK3/H4C14/POLR2F/H4C15/H2AZ1/H4C1/ERCC2/H4C6/H2BC3/TAF1D/CDK7/MTA3/HDAC2/H2BC14/H2BC17/H2BC11/H2AC8/HDAC1/TAF1A/POLR1D/H3-3A
REACTOME_SIGNALING_BY_PDGF	REACTOME_SIGNALING_BY_PDGF	58	-0.428314	-1.6116	0.00763359	0.0578111	0.042787	6630	tags=43%, list=19%, signal=35%	PIK3CB/KRAS/COL6A3/NCK1/STAT5B/PDGFRB/COL4A2/COL5A1/SOS1/PIK3CA/PTPN11/PDGFC/COL4A1/THBS4/PLAT/COL3A1/RASA1/PIK3R1/COL4A3/THBS2/COL4A4/PLG/THBS1/COL6A6/PDGFD
REACTOME_FGFR2C_LIGAND_BINDING_AND_ACTIVATION	REACTOME_FGFR2C_LIGAND_BINDING_AND_ACTIVATION	13	-0.66324	-1.78675	0.00773196	0.0581854	0.0430641	5405	tags=62%, list=15%, signal=52%	FGF1/FGFR2/FGF16/FGF18/FGF2/FGF20/FGF23/FGF5
REACTOME_FGFR3_LIGAND_BINDING_AND_ACTIVATION	REACTOME_FGFR3_LIGAND_BINDING_AND_ACTIVATION	13	-0.663814	-1.7883	0.00773196	0.0581854	0.0430641	2969	tags=54%, list=8%, signal=49%	FGF16/FGF18/FGF2/FGF20/GALNT3/FGF23/FGF5
REACTOME_ANTI_INFLAMMATORY_RESPONSE_FAVOURING_LEISHMANIA_PARASITE_INFECTION	REACTOME_ANTI_INFLAMMATORY_RESPONSE_FAVOURING_LEISHMANIA_PARASITE_INFECTION	223	-0.36812	-1.70761	0.0078125	0.0586061	0.0433754	7618	tags=48%, list=21%, signal=38%	PTGIR/YES1/ADCY4/IGHV1-46/ADRB1/GPR45/LHCGR/CD163/MYH9/ADCY6/AHCYL1/GNG2/ITPR3/PRKAR1A/ADCY3/GNB5/PLK2/GGT5/IGLC3/GNG12/GPBAR1/GPR39/ADCYAP1R1/IGKV2D-40/IGHG2/IGKV1D-12/ADRB2/FSHR/IGHG4/CYSLTR2/AVPR2/GNAT3/RAMP3/GNG10/IGKV1-39/ADAM17/CD3G/IGLV7-43/GLP1R/GPR150/RXFP1/IGHV1-69/ADCY7/GHRH/PLCG2/FYN/IGKV2D-30/IGLV6-57/ADCY9/IL10/IGLV1-44/GPR25/IGLV2-8/IGKV2-28/PTH2R/IGKV1-12/HTR7/CYSLTR1/IGHV1-2/IGKV…
REACTOME_RNA_POLYMERASE_I_PROMOTER_ESCAPE	REACTOME_RNA_POLYMERASE_I_PROMOTER_ESCAPE	89	0.467324	1.6276	0.00789474	0.0590367	0.0436941	9884	tags=51%, list=28%, signal=37%	H3C7/H2AC20/H2BC10/H3C11/H3C14/H3C4/H2AC18/H2BC9/H2AX/CD3EAP/H2BU1/ZNRD1/H2AC14/H2AB1/H4C13/H4C11/POLR2H/H4C2/H2AC4/POLR2K/H4C5/POLR2L/H2AJ/H4C4/H2AC7/H2AC19/POLR1C/GTF2H5/H4C14/POLR2F/H4C15/H2AZ1/H4C1/ERCC2/H4C6/H2BC3/TAF1D/CDK7/H2BC14/H2BC17/H2BC11/H2AC8/TAF1A/POLR1D/H3-3A
REACTOME_SLC_MEDIATED_TRANSMEMBRANE_TRANSPORT	REACTOME_SLC_MEDIATED_TRANSMEMBRANE_TRANSPORT	249	-0.302262	-1.42018	0.008	0.059609	0.0441176	3300	tags=24%, list=9%, signal=22%	SLC6A13/SLC40A1/SLCO4C1/SLC14A2/SLC35A3/AHCYL2/SLC31A1/SLC26A1/SLC39A8/SLC12A6/SLC2A14/ALB/SLC16A7/SLC16A10/SLC1A2/SLC8A3/SLC2A9/SLC17A8/SLC5A2/SLC34A1/ARL2BP/SLC2A12/CP/SLC6A1/EMB/SLC6A2/SLC39A14/SLC24A1/SLC28A1/SLC35D1/SLC18A2/SLCO2A1/SLC16A8/SLC22A7/SLC5A4/SLC14A1/SLC38A4/SLC1A1/SLC6A12/SLC41A2/SLC22A2/SLC2A2/SLCO1A2/SLC5A12/SLC7A2/SLC16A2/SLC12A1/SLCO2B1/SLC22A1/SLCO1B1/SLC34A2/SLC10A6/SLC6A2…
BIOCARTA_ARENRF2_PATHWAY	BIOCARTA_ARENRF2_PATHWAY	20	-0.571066	-1.72591	0.00802139	0.059609	0.0441176	8467	tags=55%, list=24%, signal=42%	MAPK8/POR/CREB1/MAFK/MAPK1/PRKCB/CRYZ/PRKCA/NFE2L2/FOS/GSTA2
REACTOME_DISEASES_OF_METABOLISM	REACTOME_DISEASES_OF_METABOLISM	245	-0.38214	-1.78738	0.00813008	0.0600505	0.0444444	6891	tags=37%, list=19%, signal=30%	ADAMTS4/ADAMTS18/MTRR/BGN/CYP4F22/ADAMTS8/B4GAT1/ADAMTSL4/MUCL1/ADAMTS15/ALG11/HYAL1/PC/CHSY1/GBE1/MTR/CYP11B1/GPC4/GCLC/ADAMTSL1/LMBRD1/IDS/NOTCH4/KHK/ADAMTS2/PRELP/PCCA/GPC5/THSD1/MUC21/MUC6/MAOA/MAT1A/ADAMTS12/HLCS/SLC37A4/CYP7B1/FMO3/AMN/BTD/MCCC2/NOTCH3/MCCC1/MUC16/LARGE1/EPM2A/CSF2RB/CYP11A1/ADAMTSL2/ADAMTS1/NCAN/PAPSS2/CYP1B1/CYP2U1/PAH/CFP/NOTCH2/MUC5B/PGM1/VCAN/GNE/LCT/THSD7A/LUM/MMUT/G6…
WP_GPCRS_CLASS_A_RHODOPSINLIKE	WP_GPCRS_CLASS_A_RHODOPSINLIKE	254	-0.317264	-1.49501	0.00819672	0.0600505	0.0444444	3320	tags=22%, list=9%, signal=20%	OR2C1/NMUR1/NPFFR1/AGTR2/EDNRB/HTR1B/GPR25/LPAR4/OXTR/P2RY14/P2RY13/F2RL1/HTR1E/HTR7/P2RY12/GALR1/CYSLTR1/PTGDR/P2RY10/CCR6/F2R/HTR2B/HTR4/CX3CR1/ADRA2A/GPR37/SSTR1/SUCNR1/XCR1/NPY1R/HRH2/ADRA1B/CCR8/ACKR4/AVPR1A/GPR20/CCR4/GRPR/NPY4R/HTR1D/CHRM4/GPR75/GPR17/BDKRB2/CXCR5/CCR9/GPR15/DRD1/GPR174/NPY5R/MAS1L/P2RY4/ADRA1A/CHRM2/GPR50
REACTOME_CROSS_PRESENTATION_OF_SOLUBLE_EXOGENOUS_ANTIGENS_ENDOSOMES_	REACTOME_CROSS_PRESENTATION_OF_SOLUBLE_EXOGENOUS_ANTIGENS_ENDOSOMES_	50	0.528762	1.69459	0.00821918	0.0600505	0.0444444	10262	tags=54%, list=29%, signal=39%	FCGR1A/PSMD4/PSMB4/FCGR1B/PSMB3/SEM1/PSMB6/PSMB9/PSMB8/PSME2/PSMB1/PSMD13/PSMB7/PSMC4/PSMC5/PSMC3/PSMD14/PSMA4/PSMB2/PSMB5/PSMA7/PSMD8/PSMA3/PSMA5/PSMA1/PSMB11/PSMA2
REACTOME_DEGRADATION_OF_DVL	REACTOME_DEGRADATION_OF_DVL	57	0.512465	1.66071	0.00821918	0.0600505	0.0444444	10262	tags=54%, list=29%, signal=39%	PSMD4/PSMB4/PSMB3/SEM1/HECW1/UBA52/RBX1/PSMB6/PSMB9/RPS27A/PSMB8/PSME2/PSMB1/PSMD13/PSMB7/PSMC4/PSMC5/PSMC3/PSMD14/DVL2/PSMA4/PSMB2/PSMB5/DVL1/PSMA7/PSMD8/PSMA3/PSMA5/PSMA1/PSMB11/PSMA2
REACTOME_NEGATIVE_REGULATION_OF_NOTCH4_SIGNALING	REACTOME_NEGATIVE_REGULATION_OF_NOTCH4_SIGNALING	54	0.522742	1.68518	0.00826446	0.0600505	0.0444444	10262	tags=54%, list=29%, signal=38%	PSMD4/PSMB4/TACC3/PSMB3/SEM1/UBA52/RBX1/PSMB6/PSMB9/RPS27A/PSMB8/PSME2/PSMB1/PSMD13/PSMB7/PSMC4/PSMC5/PSMC3/YWHAZ/PSMD14/PSMA4/PSMB2/PSMB5/PSMA7/PSMD8/PSMA3/PSMA5/PSMA1/PSMA2
KEGG_BETA_ALANINE_METABOLISM	KEGG_BETA_ALANINE_METABOLISM	22	-0.549376	-1.70957	0.00828729	0.0600505	0.0444444	4926	tags=55%, list=14%, signal=47%	ALDH7A1/AOC3/ALDH2/ALDH1B1/MLYCD/UPB1/DPYS/DPYD/ABAT/ACADM/EHHADH/CNDP1
REACTOME_RECOGNITION_AND_ASSOCIATION_OF_DNA_GLYCOSYLASE_WITH_SITE_CONTAINING_AN_AFFECTED_PURINE	REACTOME_RECOGNITION_AND_ASSOCIATION_OF_DNA_GLYCOSYLASE_WITH_SITE_CONTAINING_AN_AFFECTED_PURINE	56	0.512982	1.6566	0.00829876	0.0600505	0.0444444	9191	tags=57%, list=26%, signal=43%	H2AC20/H2BC10/H2AC18/H2BC9/H2AX/H3-4/H2BU1/H2AC14/NEIL3/H2AB1/H4C13/H4C11/H4C2/H2AC4/ACD/H4C5/H2AJ/H4C4/H2AC7/H2AC19/H4C14/H4C15/H2AZ1/MUTYH/OGG1/H4C1/H4C6/H2BC3/H2BC14/H2BC17/H2BC11/H2AC8
WP_TCELL_ANTIGEN_RECEPTOR_TCR_SIGNALING_PATHWAY	WP_TCELL_ANTIGEN_RECEPTOR_TCR_SIGNALING_PATHWAY	90	-0.370515	-1.50156	0.00829876	0.0600505	0.0444444	8993	tags=43%, list=25%, signal=33%	IL6/ICOS/PLCG1/MAPK8/CHUK/CBLB/CREB1/IL1B/LCP2/AKT1/NFATC2/MAPK1/CBL/PRKCQ/NCK1/MAP2K1/GRAP2/TRAF6/MAP3K14/CD3G/NFKB1/CD4/SOS1/SH2B3/CD28/PTPN11/PDPK1/FYN/PTK2B/IL17A/FYB1/SKAP1/REL/ITK/ITPR1/FAS/PIK3R1/IRF4/FOS
REACTOME_PLATELET_ACTIVATION_SIGNALING_AND_AGGREGATION	REACTOME_PLATELET_ACTIVATION_SIGNALING_AND_AGGREGATION	259	-0.31514	-1.48617	0.00833333	0.0600505	0.0444444	7774	tags=37%, list=22%, signal=29%	GNG7/SPARC/LCP2/ADRA2B/AKT1/GNA13/MAPK1/NHLRC2/VTI1B/SERPING1/GAS6/GNG2/RAP1B/ITPR3/PRKCQ/PECAM1/PIK3CB/GNB5/STXBP3/GNG12/TGFB3/PHACTR2/DGKH/PRKCZ/PRKCB/COL1A2/LAMP2/ABHD6/GNAQ/ARRB1/GNAT3/DGKE/P2RY1/TRPC6/CD36/GNG10/PRKCA/RASGRP2/APLP2/AHSG/ECM1/APP/BRPF3/SERPINA4/COL1A1/FN1/TRPC3/SOS1/RHOB/TF/RAB27B/PIK3CA/PLCG2/PTPN11/PDPK1/FYN/MPIG6B/APOOL/MPL/KNG1/PROS1/PRKCE/PRKCH/SYTL4/A1BG/RASGRP1/PLA2G4A…
WP_CHROMOSOMAL_AND_MICROSATELLITE_INSTABILITY_IN_COLORECTAL_CANCER	WP_CHROMOSOMAL_AND_MICROSATELLITE_INSTABILITY_IN_COLORECTAL_CANCER	73	-0.396424	-1.55421	0.00833333	0.0600505	0.0444444	9193	tags=51%, list=26%, signal=38%	TCF7L2/TGFB2/TGFBR1/CDKN1A/MAPK8/ARAF/TBK1/GSK3B/APC2/SMAD3/RALB/BRAF/AKT1/SMAD4/APPL1/MAPK1/AXIN2/KRAS/TGFB3/MAP2K1/CTNNB1/GADD45B/CSNK1A1L/AKT3/CCND1/POLK/MSH3/DDB2/BCL2L11/BCL2/APC/CSNK1A1/REL/GADD45A/TGFBR2/FOS/PTGS2
WP_EGFR_TYROSINE_KINASE_INHIBITOR_RESISTANCE	WP_EGFR_TYROSINE_KINASE_INHIBITOR_RESISTANCE	84	-0.388012	-1.55276	0.00840336	0.0603722	0.0446825	8746	tags=60%, list=24%, signal=45%	FOXO3/IL6R/AKT2/STAT3/NRAS/IL6/PIK3R3/PLCG1/ARAF/GSK3B/RPS6KB1/PTEN/BRAF/AKT1/MAPK1/GAS6/EIF4E/PIK3CB/KRAS/PRKCB/MAP2K1/FGFR2/PDGFRB/PRKCA/NF1/AXL/AKT3/SOS1/JAK2/PIK3CA/CCND1/PLCG2/PDPK1/MTOR/PDGFC/BCL2L11/JAK1/BCL2/MET/SOS2/GAB1/EGFR/FGF2/TGFA/ERBB2/SHC4/PIK3R1/NRG1/KDR/PDGFD
KEGG_CYTOKINE_CYTOKINE_RECEPTOR_INTERACTION	KEGG_CYTOKINE_CYTOKINE_RECEPTOR_INTERACTION	261	-0.267006	-1.26394	0.00854701	0.0612192	0.0453094	5471	tags=28%, list=15%, signal=24%	IFNLR1/PDGFRB/CCL22/IFNAR1/CXCL10/IL13RA1/FLT4/FLT3/TNFRSF10D/CXCL2/IL1RAP/IL20/CXCL6/PRLR/IL5RA/TNFSF13/CCL18/CNTF/CD40LG/AMHR2/IL23R/PDGFC/FLT1/MPL/CSF3/IL17A/CX3CL1/IL10/CSF2RB/CCL14/IL9R/MET/IL6ST/BMPR2/NGFR/CXCL13/CXCL11/CCR6/CCL2/EGFR/IL2RB/IL13/IL18R1/TNFSF8/TGFBR2/IL25/CX3CR1/IL1R1/EDA2R/FAS/KIT/CCL23/XCR1/IL7R/CXCL12/BMPR1B/CCR8/TNFSF10/IL21/KDR/PPBP/CCR4/LIFR/INHBA/CXCR5/CCR9/LEPR/INHBC…
REACTOME_DETOXIFICATION_OF_REACTIVE_OXYGEN_SPECIES	REACTOME_DETOXIFICATION_OF_REACTIVE_OXYGEN_SPECIES	37	0.5716	1.73099	0.00858369	0.0612973	0.0453673	5838	tags=46%, list=16%, signal=38%	GPX5/GPX2/GPX3/GSTP1/TXN/GPX1/TXNRD2/CYBA/SOD3/GPX6/ATOX1/NUDT2/PRDX6/NCF2/NCF4/PRDX5/NCF1
PID_LYMPH_ANGIOGENESIS_PATHWAY	PID_LYMPH_ANGIOGENESIS_PATHWAY	25	-0.543608	-1.71256	0.00869565	0.0613598	0.0454135	8069	tags=56%, list=23%, signal=43%	CREB1/AKT1/MAPK1/COL1A2/FLT4/COL1A1/FN1/ITGA1/ITGA2/SOS1/PIK3CA/ITGB1/PIK3R1/ITGA4
REACTOME_DOWNSTREAM_SIGNALING_OF_ACTIVATED_FGFR3	REACTOME_DOWNSTREAM_SIGNALING_OF_ACTIVATED_FGFR3	25	-0.55595	-1.75144	0.00869565	0.0613598	0.0454135	5076	tags=48%, list=14%, signal=41%	FGF16/SOS1/PIK3CA/PTPN11/FRS2/FGF18/GAB1/FGF2/FGF20/PIK3R1/FGF23/FGF5
REACTOME_FRS_MEDIATED_FGFR2_SIGNALING	REACTOME_FRS_MEDIATED_FGFR2_SIGNALING	25	-0.553142	-1.74259	0.00869565	0.0613598	0.0454135	5405	tags=52%, list=15%, signal=44%	FGF1/KRAS/FGFR2/FGF16/SOS1/PTPN11/FRS2/FGF18/FGF2/FGF20/FGF7/FGF23/FGF5
REACTOME_SIGNALING_BY_NTRK2_TRKB_	REACTOME_SIGNALING_BY_NTRK2_TRKB_	25	-0.544229	-1.71452	0.00869565	0.0613598	0.0454135	4187	tags=48%, list=12%, signal=42%	SOS1/GRIN2B/PIK3CA/PTPN11/FYN/FRS2/BDNF/NTF3/GAB1/TIAM1/PIK3R1/NTRK2
REACTOME_ANTIGEN_PROCESSING_CROSS_PRESENTATION	REACTOME_ANTIGEN_PROCESSING_CROSS_PRESENTATION	99	0.453935	1.60362	0.00879397	0.0617176	0.0456783	10262	tags=48%, list=29%, signal=35%	LY96/CTSV/FCGR1A/PSMD4/PSMB4/FCGR1B/SEC61G/PSMB3/SEM1/UBA52/HLA-A/CYBA/PSMB6/HLA-F/SEC61B/NCF2/PSMB9/NCF4/RPS27A/PSMB8/PSME2/PSMB1/NCF1/HLA-G/PSMD13/HLA-B/PSMB7/PSMC4/PSMC5/PSMC3/STX4/PSMD14/CALR/TAP2/PSMA4/VAMP8/PSMB2/CTSS/SEC61A1/PSMB5/PDIA3/PSMA7/PSMD8/PSMA3/PSMA5/PSMA1/PSMB11/PSMA2
REACTOME_COPI_DEPENDENT_GOLGI_TO_ER_RETROGRADE_TRAFFIC	REACTOME_COPI_DEPENDENT_GOLGI_TO_ER_RETROGRADE_TRAFFIC	100	0.470346	1.65677	0.00888325	0.0617176	0.0456783	7283	tags=41%, list=20%, signal=33%	TUBA3E/TUBA3C/TUBB8/KLC3/TUBAL3/KIF2C/TUBA4B/KIF21B/TUBA4A/TUBB8B/KIFC1/KIF3C/TMED3/TUBB4B/COPE/KIF25/KIF18B/KIF20A/USE1/KIF26B/TUBA3D/TMED9/ARF1/KIF22/KIF23/KIF5A/KIF11/TUBB4A/ARFGAP1/KIF15/TUBA1C/BNIP1/KIF4A/KIF9/TUBB2B/KIF18A/COPZ1/TUBA1A/KIF12/RACGAP1/CENPE
WP_NEURAL_CREST_DIFFERENTIATION	WP_NEURAL_CREST_DIFFERENTIATION	100	0.468723	1.65105	0.00888325	0.0617176	0.0456783	4950	tags=26%, list=14%, signal=22%	OLIG3/WNT3A/BMP7/TFAP2B/OLIG2/MPZ/TLX2/FGF19/PAX3/MIA/ISL1/HAND1/DLL3/FOXD3/LHX5/MSX1/GBX2/HDAC11/HDAC10/WNT8A/OLIG1/ZIC5/HES5/NFKB2/DLX5/PAX7
KEGG_O_GLYCAN_BIOSYNTHESIS	KEGG_O_GLYCAN_BIOSYNTHESIS	30	-0.533864	-1.75175	0.00890208	0.0617176	0.0456783	3381	tags=50%, list=9%, signal=45%	GALNT1/GALNT11/B4GALT5/GCNT4/ST3GAL1/ST6GALNAC1/GALNT16/GALNT5/GALNT7/GALNT12/GALNT3/GALNT17/GALNT15/GALNT4/GALNTL6
WP_BASE_EXCISION_REPAIR	WP_BASE_EXCISION_REPAIR	31	0.581893	1.68556	0.00890208	0.0617176	0.0456783	10345	tags=55%, list=29%, signal=39%	NEIL3/POLD1/PNKP/SMUG1/NTHL1/POLE4/MUTYH/OGG1/POLE2/POLB/PARP1/POLD2/LIG1/XRCC1/FEN1/PCNA/APEX2
WP_EICOSANOID_METABOLISM_VIA_CYCLO_OXYGENASES_COX	WP_EICOSANOID_METABOLISM_VIA_CYCLO_OXYGENASES_COX	30	-0.544997	-1.78828	0.00890208	0.0617176	0.0456783	2857	tags=47%, list=8%, signal=43%	CYP4F12/PTGFR/ACOX2/PLA2G4A/HPGD/ACAA1/PTGDR/CYP4A11/ACOX1/CYP4F2/CYP4A22/EHHADH/PTGS2/PTGIS
REACTOME_RECRUITMENT_OF_NUMA_TO_MITOTIC_CENTROSOMES	REACTOME_RECRUITMENT_OF_NUMA_TO_MITOTIC_CENTROSOMES	94	0.458257	1.60748	0.00896287	0.0619584	0.0458565	8118	tags=36%, list=23%, signal=28%	TUBA3E/TUBA3C/TUBB8/TUBAL3/HAUS7/TUBA4B/SSNA1/PLK1/MZT2B/TUBA4A/MZT2A/TUBB8B/CDK1/NEK2/TUBB4B/CEP131/DYNLL1/SFI1/HAUS8/TUBA3D/CEP72/TUBB4A/PPP2R1A/TUBA1C/CENPJ/TUBG1/HAUS1/TUBB2B/NME7/TUBA1A/HAUS5/TUBB/MZT1/PLK4
NABA_CORE_MATRISOME	NABA_CORE_MATRISOME	274	-0.409706	-1.95894	0.00909091	0.0626614	0.0463768	6186	tags=44%, list=17%, signal=37%	COL1A2/MFAP5/TSKU/VWA5A/COCH/IGFBP1/SMOC2/SPOCK1/EMILIN3/SPARCL1/LTBP3/EFEMP1/CRISPLD1/TGFBI/HMCN1/IBSP/PXDN/SMOC1/COL4A2/ECM1/COL4A6/COL1A1/PRELP/FNDC8/FN1/PRG2/IMPG1/COL5A1/TNC/COL18A1/SLIT3/COL22A1/IGFBP5/FGL2/OTOL1/CCN2/ASPN/LTBP1/MATN2/TECTA/EYS/LTBP4/MMRN2/SRPX/COL4A1/MFAP4/COMP/THBS4/PRG4/LAMB3/PXDNL/NCAN/LAMC2/SNED1/CRISPLD2/CRIM1/COL15A1/ZP2/SLIT2/LAMC3/COL12A1/ANOS1/VWA7/SPOCK3/CCN1/COL…
WP_TRANSSULFURATION_AND_ONE_CARBON_METABOLISM	WP_TRANSSULFURATION_AND_ONE_CARBON_METABOLISM	31	-0.556816	-1.83727	0.00914634	0.0628613	0.0465247	7067	tags=48%, list=20%, signal=39%	AHCYL1/MAT2A/MTR/MAT2B/GCLC/CTH/DHFR2/SHMT1/MAT1A/CBS/DHFR/AHCYL2/MTHFD1/DNMT3L/BHMT
PID_IL1_PATHWAY	PID_IL1_PATHWAY	34	-0.521252	-1.77428	0.009375	0.0642471	0.0475504	8467	tags=53%, list=24%, signal=40%	MAPK8/CHUK/IL1B/IRAK3/UBE2V1/PRKCZ/MAP3K3/TRAF6/MYD88/NFKB1/IL1RAP/MAP2K6/TAB2/PIK3CA/ERC1/TICAM2/IL1R1/PIK3R1
NABA_PROTEOGLYCANS	NABA_PROTEOGLYCANS	35	-0.479416	-1.65202	0.00943396	0.0642807	0.0475753	4646	tags=40%, list=13%, signal=35%	PRELP/PRG2/IMPG1/ASPN/PRG4/NCAN/SPOCK3/VCAN/LUM/PODN/HSPG2/DCN/OMD/OGN
REACTOME_GPVI_MEDIATED_ACTIVATION_CASCADE	REACTOME_GPVI_MEDIATED_ACTIVATION_CASCADE	35	-0.508436	-1.75202	0.00943396	0.0642807	0.0475753	6630	tags=43%, list=19%, signal=35%	PIK3CB/PRKCZ/COL1A2/COL1A1/RHOB/PIK3CA/PLCG2/PTPN11/PDPK1/FYN/MPIG6B/PIK3R1/PIK3CG/GP6/CLEC1B
REACTOME_INHIBITION_OF_DNA_RECOMBINATION_AT_TELOMERE	REACTOME_INHIBITION_OF_DNA_RECOMBINATION_AT_TELOMERE	68	0.483476	1.60629	0.00947226	0.0643572	0.0476319	9191	tags=54%, list=26%, signal=41%	H2AC20/H2BC10/H2AC18/H2BC9/POLR2J/H2AX/H3-4/H2BU1/H2AC14/POLR2I/H2AB1/H4C13/H4C11/POLR2H/H4C2/H2AC4/POLR2K/ACD/H4C5/POLR2L/H2AJ/H4C4/H2AC7/H2AC19/POLR2G/H4C14/POLR2F/H4C15/H2AZ1/H4C1/H4C6/H2BC3/DAXX/H2BC14/H2BC17/H2BC11/H2AC8
REACTOME_INTERLEUKIN_6_SIGNALING	REACTOME_INTERLEUKIN_6_SIGNALING	11	-0.706112	-1.8166	0.00956938	0.0648319	0.0479832	10532	tags=100%, list=29%, signal=71%	IL6R/STAT3/IL6/STAT1/SOCS3/CBL/JAK2/PTPN11/JAK1/IL6ST
REACTOME_COHESIN_LOADING_ONTO_CHROMATIN	REACTOME_COHESIN_LOADING_ONTO_CHROMATIN	10	-0.726743	-1.79647	0.00973236	0.0657487	0.0486618	9327	tags=80%, list=26%, signal=59%	SMC3/PDS5A/WAPL/NIPBL/PDS5B/STAG2/SMC1A/STAG1
REACTOME_FORMATION_OF_FIBRIN_CLOT_CLOTTING_CASCADE_	REACTOME_FORMATION_OF_FIBRIN_CLOT_CLOTTING_CASCADE_	38	-0.475209	-1.67272	0.00980392	0.0660445	0.0488807	5975	tags=45%, list=17%, signal=37%	F13B/F3/PRCP/SERPINA5/SERPIND1/F12/KNG1/PROS1/GP1BA/F2R/VWF/KLKB1/THBD/F8/F9/F11/GP5
REACTOME_EXTRACELLULAR_MATRIX_ORGANIZATION	REACTOME_EXTRACELLULAR_MATRIX_ORGANIZATION	300	-0.341701	-1.64761	0.00990099	0.0663227	0.0490866	6893	tags=41%, list=19%, signal=33%	DDR2/ADAMTS4/ADAMTS18/BGN/ADAMTS8/TTR/NID1/PECAM1/ADAM12/COL6A3/BMP2/TGFB3/ITGA6/CAPN7/COL26A1/COL1A2/MFAP5/CAST/ADAM10/BMP4/ELANE/EMILIN3/LTBP3/CASK/EFEMP1/ITGB8/TPSAB1/PRKCA/JAM2/LRP4/IBSP/PXDN/CTSG/COL4A2/ADAM17/APP/COL4A6/ITGA8/ADAMTS2/COL1A1/MMP20/NCAM1/MMP2/ITGA10/FN1/COL5A1/ITGA1/ITGA2/TNC/COL18A1/COL22A1/ASPN/CAPN5/CAPN13/LTBP1/LTBP4/COL4A1/CAPN3/DST/MFAP4/P4HA3/COMP/ICAM3/LAMB3/ADAMTS1/N…
WP_FACTORS_AND_PATHWAYS_AFFECTING_INSULINLIKE_GROWTH_FACTOR_IGF1AKT_SIGNALING	WP_FACTORS_AND_PATHWAYS_AFFECTING_INSULINLIKE_GROWTH_FACTOR_IGF1AKT_SIGNALING	37	-0.481219	-1.66314	0.00990099	0.0663227	0.0490866	8322	tags=57%, list=23%, signal=44%	GSK3B/SMAD3/RPS6KB1/JKAMP/PTEN/AKT1/EIF4E/RICTOR/MSTN/NFKB1/IGFBP5/WASL/PLD1/PPARGC1A/MTOR/NEB/ILK/IRS1/ITGB1/PIK3CG/TRIM63
KEGG_LYSINE_DEGRADATION	KEGG_LYSINE_DEGRADATION	44	-0.477805	-1.71582	0.00993377	0.0663554	0.0491108	8325	tags=59%, list=23%, signal=45%	ASH1L/HADH/ALDH9A1/NSD1/HADHA/ALDH3A2/EHMT1/OGDH/TMLHE/DLST/SETD2/GCDH/AASDH/PIPOX/AASDHPPT/ALDH7A1/KMT5B/ALDH2/OGDHL/ALDH1B1/ACAT1/SETD7/AASS/EHHADH/AADAT/BBOX1
REACTOME_METABOLISM_OF_CARBOHYDRATES	REACTOME_METABOLISM_OF_CARBOHYDRATES	292	-0.306004	-1.46791	0.01	0.0666106	0.0492997	6326	tags=29%, list=18%, signal=24%	PRPS2/PHKB/MAN2C1/RANBP2/HYAL1/NUP54/PC/PFKM/RHD/CHSY1/PPP2CB/GBE1/B4GALT5/DERA/NUP160/CSGALNACT2/GPC4/GLYCTK/IDS/NUP153/KHK/PPP2R1B/GCKR/ST3GAL6/PRELP/GPC5/GOT2/NDST1/SLC37A4/CHP1/POM121/HS3ST3A1/B3GNT2/UGP2/ST3GAL1/EPM2A/PFKFB3/HAS1/DSE/SLC25A13/PFKFB1/TKFC/CHSY3/SLC26A1/B3GAT2/XYLT1/NCAN/B3GNT7/PAPSS2/PGM2/PCK2/HS3ST1/PYGL/HS6ST3/PGM1/RHCE/PHKA1/VCAN/SORD/LUM/FBP2/HS3ST2/G6PC/UST/LYVE1/PCK1/B3…
BIOCARTA_MHC_PATHWAY	BIOCARTA_MHC_PATHWAY	12	0.708269	1.66058	0.010101	0.0669086	0.0495203	8843	tags=75%, list=25%, signal=56%	HLA-DRB1/HLA-A/PSMB6/PSMB9/PSMB8/HLA-DRB5/CD74/TAP2/PSMB5
REACTOME_LEISHMANIA_INFECTION	REACTOME_LEISHMANIA_INFECTION	306	-0.329345	-1.5989	0.010101	0.0669086	0.0495203	7618	tags=41%, list=21%, signal=32%	PTGIR/YES1/NCKAP1/ADCY4/MAPK1/IGHV1-46/ADRB1/GPR45/LHCGR/CD163/MYH9/ADCY6/AHCYL1/GNG2/ITPR3/ACTR2/PRKAR1A/C3/ADCY3/GNB5/PLK2/GGT5/IGLC3/GNG12/NCK1/GPBAR1/GPR39/ADCYAP1R1/CYFIP1/IGKV2D-40/IGHG2/IGKV1D-12/ADRB2/FSHR/IGHG4/CYSLTR2/AVPR2/GNAT3/RAMP3/GNG10/IGKV1-39/CTSG/ADAM17/APP/MYO5A/TXNIP/CD3G/NFKB1/IGLV7-43/DOCK1/GLP1R/GPR150/RXFP1/IGHV1-69/WASL/ADCY7/NLRP3/GHRH/NT5E/PLCG2/FYN/IGKV2D-30/IGLV6-57/…
REACTOME_ELASTIC_FIBRE_FORMATION	REACTOME_ELASTIC_FIBRE_FORMATION	45	-0.468539	-1.68451	0.0102389	0.0676337	0.0500569	6422	tags=49%, list=18%, signal=40%	BMP2/TGFB3/MFAP5/BMP4/EMILIN3/LTBP3/EFEMP1/ITGB8/ITGA8/FN1/LTBP1/LTBP4/MFAP4/ELN/ITGB1/FBN1/FBLN5/MFAP3/LTBP2/FBLN2/ITGB3/BMP10
REACTOME_G_ALPHA_Q_SIGNALLING_EVENTS	REACTOME_G_ALPHA_Q_SIGNALLING_EVENTS	215	0.363634	1.40003	0.0104046	0.0684277	0.0506446	3978	tags=21%, list=11%, signal=19%	NTS/GCG/TAC1/CCK/GAST/KISS1R/TRH/HCRT/KISS1/TACR3/CCKBR/HTR2C/LPAR3/GNG4/AVP/UTS2/NMU/MCHR2/GPRC6A/NMB/GRM1/ADRA1D/PIK3R2/CHRM1/HCRTR2/GNG8/XCL1/P2RY6/NPFFR2/GNGT1/TACR2/FFAR3/HRAS/MMP3/RGS5/FFAR2/PMCH/FFAR1/NPSR1/LPAR2/GNG13/GHSR/XCL2/GNB3/RGS2
REACTOME_HEME_DEGRADATION	REACTOME_HEME_DEGRADATION	14	-0.623733	-1.68354	0.0104167	0.0684277	0.0506446	5736	tags=57%, list=16%, signal=48%	SLCO1B3/GSTA1/ABCC2/ALB/ABCG2/SLCO2B1/UGT1A4/SLCO1B1
REACTOME_CONDENSATION_OF_PROPHASE_CHROMOSOMES	REACTOME_CONDENSATION_OF_PROPHASE_CHROMOSOMES	72	0.476563	1.61456	0.0104849	0.0686864	0.050836	9191	tags=51%, list=26%, signal=38%	H3C7/H2AC20/H2BC10/H3C11/H3C14/H3C4/H2AC18/PLK1/H2BC9/H2AX/H3-4/CDK1/CCNB1/H2BU1/H2AC14/H2AB1/H4C13/NCAPH2/H4C11/H4C2/H2AC4/H4C5/H2AJ/H4C4/H2AC7/H2AC19/KMT5A/H4C14/H4C15/H2AZ1/H4C1/H4C6/H2BC3/H2BC14/H2BC17/H2BC11/H2AC8
REACTOME_REGULATION_OF_MRNA_STABILITY_BY_PROTEINS_THAT_BIND_AU_RICH_ELEMENTS	REACTOME_REGULATION_OF_MRNA_STABILITY_BY_PROTEINS_THAT_BIND_AU_RICH_ELEMENTS	87	0.470001	1.63049	0.010596	0.0692235	0.0512335	10262	tags=49%, list=29%, signal=35%	EXOSC4/HSPB1/PSMD4/PSMB4/HSPA1A/PSMB3/EXOSC5/SEM1/EXOSC1/MAPKAPK2/UBA52/PSMB6/PSMB9/EXOSC7/RPS27A/PSMB8/PSME2/PSMB1/EXOSC3/PSMD13/PSMB7/PSMC4/PSMC5/PSMC3/YWHAZ/EXOSC8/PSMD14/PABPC1/EXOSC9/PSMA4/PSMB2/PSMB5/EXOSC2/PSMA7/PRKCD/MAPK11/PSMD8/PSMA3/ANP32A/PSMA5/PSMA1/PSMB11/PSMA2
WP_FOCAL_ADHESIONPI3KAKTMTORSIGNALING_PATHWAY	WP_FOCAL_ADHESIONPI3KAKTMTORSIGNALING_PATHWAY	302	-0.328787	-1.57849	0.0106383	0.0693092	0.051297	7477	tags=40%, list=21%, signal=32%	MAPK1/COL5A3/CHAD/FGF1/ITGAV/HIF1A/LAMB2/PPP2R5E/ITGA7/CAB39/EPHA2/GNG2/INSR/EIF4E/FGF12/CREB3L2/RAB14/PIK3CB/EIF4B/KRAS/ANGPT4/GNG12/ITGA6/CDKN1B/COL1A2/NOS3/MAP2K1/PRKAA1/PPP2CB/PHLPP2/ITGB8/FGFR2/GNG10/PDGFRB/CREB5/EFNA2/IFNAR1/PIK3IP1/MDM2/FGF16/IRS2/IBSP/FLT4/COL4A2/PPP2R1B/PPP2R3A/COL4A6/ITGA8/COL1A1/ITGA10/FN1/AKT3/COL5A1/ITGA2/TNC/PRLR/SOS1/JAK2/PIK3CA/PDPK1/PPARGC1A/MTOR/PDGFC/FLT1/PHLPP…
REACTOME_FGFR2_LIGAND_BINDING_AND_ACTIVATION	REACTOME_FGFR2_LIGAND_BINDING_AND_ACTIVATION	20	-0.564984	-1.70753	0.0106952	0.0694895	0.0514304	5405	tags=40%, list=15%, signal=34%	FGFR2/FGF16/FGF18/FGF2/FGF20/FGF7/FGF23/FGF5
REACTOME_SYNTHESIS_OF_PIPS_AT_THE_PLASMA_MEMBRANE	REACTOME_SYNTHESIS_OF_PIPS_AT_THE_PLASMA_MEMBRANE	53	-0.436987	-1.61417	0.0110294	0.0714658	0.0528931	8884	tags=47%, list=25%, signal=36%	INPP5D/PIK3R3/MTMR1/PIK3R5/PLEKHA2/PTEN/RAB14/PIP5K1B/PIK3CB/PLEKHA1/PLEKHA5/MTMR6/MTMR9/PI4K2B/PIK3CA/SYNJ1/MTM1/PIK3C2A/SBF2/BMX/PIK3C2G/INPP4B/PIK3R1/PIK3CG/PTPN13
REACTOME_MHC_CLASS_II_ANTIGEN_PRESENTATION	REACTOME_MHC_CLASS_II_ANTIGEN_PRESENTATION	124	0.424996	1.54476	0.0111524	0.0720664	0.0533376	7294	tags=37%, list=20%, signal=30%	TUBA3E/TUBA3C/TUBB8/CTSV/KLC3/TUBAL3/AP1M2/KIF2C/TUBA4B/CAPZA3/TUBA4A/HLA-DMA/TUBB8B/IFI30/KIF3C/CLTA/TUBB4B/DNM1/HLA-DRB1/HLA-DQB1/KIF20A/AP2S1/LAG3/DYNLL1/TUBA3D/CTSA/HLA-DOB/ARF1/KIF22/KIF23/KIF5A/HLA-DQB2/KIF11/TUBB4A/HLA-DRB5/KIF15/TUBA1C/KIF4A/CD74/TUBB2B/HLA-DQA2/KIF18A/TUBA1A/RACGAP1/CENPE/CTSC
WP_PI3KAKT_SIGNALING_PATHWAY	WP_PI3KAKT_SIGNALING_PATHWAY	337	-0.313693	-1.51937	0.011236	0.0723852	0.0535736	7400	tags=38%, list=21%, signal=30%	CHAD/FGF1/ITGAV/LAMB2/PPP2R5E/SGK1/ITGA7/EPHA2/PPP2R2A/GNG2/INSR/EIF4E/FGF12/CREB3L2/PIK3CB/EIF4B/GNB5/KRAS/COL6A3/ANGPT4/GNG12/ITGA6/CCNE1/CDKN1B/COL1A2/NOS3/MAP2K1/PRKAA1/PPP2CB/PHLPP2/ITGB8/PKN2/FGFR2/GNG10/PDGFRB/PRKCA/CREB5/EFNA2/SGK2/IFNAR1/MDM2/IBSP/FLT4/FLT3/COL4A2/PPP2R1B/PPP2R3A/COL4A6/ITGA8/COL1A1/NFKB1/CDK6/ITGA10/FN1/AKT3/ITGA1/ITGA2/TNC/PRLR/SOS1/JAK2/PIK3CA/CCND1/PDPK1/MTOR/PDGFC/B…
KEGG_PROTEASOME	KEGG_PROTEASOME	46	0.540929	1.69391	0.0112994	0.0723852	0.0535736	10262	tags=57%, list=29%, signal=40%	PSMD4/PSMB4/PSMB3/SEM1/POMP/PSMB6/PSMB9/PSMB8/PSME2/PSMB1/PSMD13/PSMB7/PSMC4/PSMC5/PSMC3/PSMD14/PSMA4/PSMB2/PSMB5/PSMA7/PSMD8/PSMA3/PSMA5/PSMA1/PSMB11/PSMA2
REACTOME_SENESCENCE_ASSOCIATED_SECRETORY_PHENOTYPE_SASP_	REACTOME_SENESCENCE_ASSOCIATED_SECRETORY_PHENOTYPE_SASP_	110	0.431428	1.53405	0.0113924	0.0723852	0.0535736	9192	tags=45%, list=26%, signal=33%	UBE2C/UBE2S/H3C7/H2AC20/H2BC10/H3C11/H3C14/H3C4/H2AC18/CDKN2A/H2BC9/H2AX/H2BU1/H2AC14/ANAPC11/H2AB1/H4C13/H4C11/H4C2/UBA52/H2AC4/IL1A/H4C5/CDKN2D/H2AJ/H4C4/ANAPC7/CXCL8/H2AC7/RPS27A/H2AC19/CCNA1/CEBPB/EHMT2/MAPK3/H4C14/H4C15/H2AZ1/CDKN2C/H4C1/H4C6/H2BC3/CDC16/UBE2E1/H2BC14/H2BC17/H2BC11/H2AC8/CCNA2
PID_FCER1_PATHWAY	PID_FCER1_PATHWAY	60	-0.418061	-1.58068	0.0114504	0.0723852	0.0535736	8715	tags=52%, list=24%, signal=39%	WIPF1/PLCG1/MAPK8/IGHE/CHUK/CBLB/LCP2/AKT1/NFATC2/MAPK1/CBL/MS4A2/MAP3K1/PRKCB/MAP2K1/FER/NFKB1/PLPP1/SOS1/PIK3CA/PTPN11/FYN/PLA2G4A/S1PR1/DUSP1/FCER1A/RASA1/ITK/PIK3R1/FOS/PTPN13
BIOCARTA_EIF4_PATHWAY	BIOCARTA_EIF4_PATHWAY	24	-0.552114	-1.73356	0.0114613	0.0723852	0.0535736	8205	tags=71%, list=23%, signal=55%	RPS6KB1/PTEN/EIF4A2/AKT1/MAPK1/EIF4G2/EIF4E/EIF4G3/PRKCB/PRKCA/PIK3CA/PDPK1/MTOR/IRS1/PDK2/PIK3R1/GHR
REACTOME_ESTROGEN_DEPENDENT_NUCLEAR_EVENTS_DOWNSTREAM_OF_ESR_MEMBRANE_SIGNALING	REACTOME_ESTROGEN_DEPENDENT_NUCLEAR_EVENTS_DOWNSTREAM_OF_ESR_MEMBRANE_SIGNALING	24	-0.568476	-1.78494	0.0114613	0.0723852	0.0535736	10440	tags=71%, list=29%, signal=50%	EPGN/ELK1/XPO1/FOXO3/AKT2/CREB1/AKT1/MAPK1/CDKN1B/AKT3/CCND1/BCL2/AREG/EREG/EGFR/TGFA/FOS
WP_ANGIOGENESIS	WP_ANGIOGENESIS	24	-0.553728	-1.73863	0.0114613	0.0723852	0.0535736	8570	tags=62%, list=24%, signal=48%	PLCG1/ANGPT1/AKT1/MAPK1/HIF1A/NOS3/FGFR2/CREBBP/PIK3CA/FLT1/FGF2/SMAD1/KDR/TIMP3/TEK
PID_VEGFR1_PATHWAY	PID_VEGFR1_PATHWAY	26	-0.535483	-1.70464	0.0115607	0.0723852	0.0535736	7767	tags=69%, list=22%, signal=54%	PLCG1/CAV1/AKT1/MAPK1/HIF1A/CBL/NCK1/PRKCB/NOS3/NRP1/NRP2/PRKCA/PIK3CA/PTPN11/PDPK1/FLT1/RASA1/PIK3R1
REACTOME_ENDOGENOUS_STEROLS	REACTOME_ENDOGENOUS_STEROLS	26	-0.536501	-1.70788	0.0115607	0.0723852	0.0535736	5363	tags=50%, list=15%, signal=43%	NCOA1/CYP46A1/CYP11B1/AHR/CYP7B1/CYP7A1/CYP11A1/CYP1B1/CYP39A1/CYP51A1/CYP4V2/CYP8B1/PTGIS
KEGG_PROXIMAL_TUBULE_BICARBONATE_RECLAMATION	KEGG_PROXIMAL_TUBULE_BICARBONATE_RECLAMATION	23	-0.541776	-1.68368	0.0116279	0.0723852	0.0535736	3593	tags=35%, list=10%, signal=31%	ATP1A3/PCK2/PCK1/AQP1/CA2/CA4/SLC4A4/GLS2
REACTOME_FRS_MEDIATED_FGFR1_SIGNALING	REACTOME_FRS_MEDIATED_FGFR1_SIGNALING	23	-0.546614	-1.69872	0.0116279	0.0723852	0.0535736	4187	tags=35%, list=12%, signal=31%	SOS1/PTPN11/FRS2/FGF2/FGF20/FGF23/KL/FGF5
WP_BLOOD_CLOTTING_CASCADE	WP_BLOOD_CLOTTING_CASCADE	23	-0.542618	-1.6863	0.0116279	0.0723852	0.0535736	8599	tags=61%, list=24%, signal=46%	FGA/F7/F5/F2/F13B/F3/F12/PLAT/VWF/KLKB1/F8/F9/PLG/F11
WP_ESTROGEN_SIGNALING_PATHWAY	WP_ESTROGEN_SIGNALING_PATHWAY	23	-0.541107	-1.68161	0.0116279	0.0723852	0.0535736	8345	tags=57%, list=23%, signal=43%	CHUK/CREB1/GPER1/BRAF/AKT1/MAPK1/SP1/MAP2K1/NFKB1/PIK3CA/BCL2/FOS/ESR1
WP_GDNFRET_SIGNALLING_AXIS	WP_GDNFRET_SIGNALLING_AXIS	23	-0.545652	-1.69573	0.0116279	0.0723852	0.0535736	6438	tags=52%, list=18%, signal=43%	GFRA1/BMP4/CTNNB1/SALL1/SPRY1/AGTR2/ROBO2/SLIT2/RET/GREM1/PAX2/FAT4
REACTOME_DISEASES_OF_SIGNAL_TRANSDUCTION_BY_GROWTH_FACTOR_RECEPTORS_AND_SECOND_MESSENGERS	REACTOME_DISEASES_OF_SIGNAL_TRANSDUCTION_BY_GROWTH_FACTOR_RECEPTORS_AND_SECOND_MESSENGERS	384	-0.260707	-1.28779	0.0117647	0.0730456	0.0540624	9247	tags=41%, list=26%, signal=30%	NRAS/PSEN1/PPP2R5C/MAML1/TCF7L2/PSMA8/ZMYM2/TGFBR1/CUL1/PSMA6/FGF10/CCNC/ICOS/PIK3R3/NCBP1/BAG4/POLR2C/CDKN1A/DUSP10/FGA/PLCG1/ZC3HAV1/ARAF/STAT1/CHUK/GSK3B/SMAD3/OS9/CREB1/SPRED1/TRAK1/PTEN/FBXW7/BRAF/CLCN6/YES1/AKT1/SMAD4/MAPK1/FGF1/PPP2R5E/CNKSR2/FZD5/FOXO4/CBL/MPRIP/AGGF1/RAP1B/DLL1/NEURL1B/PIK3CB/KRAS/RICTOR/SHH/KDM7A/DKK4/ESR2/RNF43/TNKS2/CDKN1B/CNTRL/CUX1/SPRED2/MAP2K1/ADAM10/HEY2/QKI/DHH/…
REACTOME_KERATAN_SULFATE_BIOSYNTHESIS	REACTOME_KERATAN_SULFATE_BIOSYNTHESIS	28	-0.523262	-1.6964	0.0118343	0.0732865	0.0542406	5327	tags=36%, list=15%, signal=30%	B4GALT5/ST3GAL6/PRELP/B3GNT2/ST3GAL1/B3GNT7/LUM/OMD/OGN/CHST5
REACTOME_HCMV_INFECTION	REACTOME_HCMV_INFECTION	159	0.405477	1.51759	0.0118765	0.0733118	0.0542594	9451	tags=43%, list=26%, signal=32%	TUBA3E/TUBA3C/TUBB8/H3C7/TUBAL3/H2AC20/H2BC10/H3C11/H3C14/H3C4/H2AC12/TUBA4B/H2AC18/VPS28/H2AW/H2BC9/TUBA4A/TUBB8B/H2BU1/H2AC14/H2AC21/TUBB4B/H4C13/H4C11/H4C2/DYNLL1/H2AC4/CHMP2A/TUBA3D/H4C5/H4C4/TRIM28/SNF8/GPS2/CHMP4A/MVB12A/H2AC7/TUBB4A/CEBPD/H2AC19/TUBA1C/TUBB2B/H4C14/NUP93/CHMP4C/H4C15/TUBA1A/H2AC17/EZH2/CHMP4B/NUP62/H4C1/NUP210/H4C6/H2BC3/DAXX/RAE1/TUBB2A/NUP43/DYNC1LI1/H2BC14/H2BC17/VPS4A/…
WP_NUCLEAR_RECEPTORS_METAPATHWAY	WP_NUCLEAR_RECEPTORS_METAPATHWAY	318	-0.37344	-1.78816	0.0119048	0.0733118	0.0542594	5201	tags=34%, list=15%, signal=29%	SLC2A10/GCLC/SLC39A5/IRS2/CYP4F12/SLC5A9/ABCC2/NFE2L2/PDE4B/SEC14L1/CES3/APOA5/AHR/SMC1A/STOM/SLC5A3/CAVIN2/CCND1/PPARGC1A/EP300/AKAP13/POLK/NR3C1/CDC42EP3/SPRY1/GSTA5/SLC6A13/CYP7A1/CYP1A1/EGR1/PPARA/SLC6A4/CES5A/SLC39A8/SLC2A14/CPEB4/CYP1B1/ACAA1/EPB41L4B/ABCG5/FOXO1/CCL2/PRRG4/CPT2/SLC2A9/EGFR/UGT2B7/PMP2/TGFBR2/KAT2B/SLC5A2/MYOF/SLC2A12/ABCB4/TGFA/NRIP1/ABCB1/SLC6A1/BAAT/SLC27A5/CPT1A/ABCG8/S…
REACTOME_APOPTOTIC_CLEAVAGE_OF_CELL_ADHESION_PROTEINS	REACTOME_APOPTOTIC_CLEAVAGE_OF_CELL_ADHESION_PROTEINS	11	-0.693386	-1.78386	0.0119617	0.0733118	0.0542594	5629	tags=82%, list=16%, signal=69%	PKP1/CTNNB1/TJP2/DSP/DSG2/TJP1/CDH1/OCLN/DSG1
REACTOME_CLEC7A_DECTIN_1_INDUCES_NFAT_ACTIVATION	REACTOME_CLEC7A_DECTIN_1_INDUCES_NFAT_ACTIVATION	11	-0.695557	-1.78945	0.0119617	0.0733118	0.0542594	7481	tags=64%, list=21%, signal=50%	NFATC2/AHCYL1/ITPR3/PPP3CA/NFATC3/ITPR2/ITPR1
KEGG_PATHWAYS_IN_CANCER	KEGG_PATHWAYS_IN_CANCER	325	-0.300111	-1.44082	0.0120482	0.0736519	0.0545111	8488	tags=40%, list=24%, signal=31%	PIK3R5/MAPK8/ARAF/STAT1/CHUK/CBLB/GSK3B/APC2/SMAD3/RALB/NTRK1/PTEN/XIAP/RALBP1/SMO/BRAF/FGF11/NKX3-1/AKT1/SMAD4/APPL1/MAPK1/WNT3/FGF1/VHL/ITGAV/HIF1A/LAMB2/FZD5/RARB/CBL/AXIN2/FGF12/PTCH2/FZD3/PIK3CB/KRAS/SHH/BMP2/BIRC2/TGFB3/ITGA6/CCNE1/CDKN1B/PIAS1/PRKCB/MAP2K1/BMP4/STAT5B/TRAF6/WNT16/CTNNB1/RB1/FGFR2/PDGFRB/PRKCA/FZD1/MDM2/FGF16/FLT3/COL4A2/COL4A6/WNT11/NFKB1/CDK6/CREBBP/MMP2/FN1/AKT3/ITGA2/SO…
REACTOME_SCF_SKP2_MEDIATED_DEGRADATION_OF_P27_P21	REACTOME_SCF_SKP2_MEDIATED_DEGRADATION_OF_P27_P21	60	0.484364	1.58532	0.0121622	0.074158	0.0548857	10262	tags=48%, list=29%, signal=35%	PSMD4/PSMB4/CKS1B/PSMB3/SEM1/UBA52/PSMB6/PSMB9/RPS27A/PSMB8/PSME2/PSMB1/CCNA1/PSMD13/PSMB7/PSMC4/PSMC5/PSMC3/PSMD14/PSMA4/PSMB2/PSMB5/CCNA2/PSMA7/PSMD8/PSMA3/PSMA5/PSMA1/PSMA2
WP_ETHANOL_EFFECTS_ON_HISTONE_MODIFICATIONS	WP_ETHANOL_EFFECTS_ON_HISTONE_MODIFICATIONS	31	-0.515986	-1.70255	0.0121951	0.0741688	0.0548936	5475	tags=35%, list=15%, signal=30%	MTR/MAT1A/ALDH2/DHFR/HDAC6/ADH1C/CYP2E1/KAT2B/ADH1A/ALDH1A3/ADH1B
REACTOME_DEGRADATION_OF_AXIN	REACTOME_DEGRADATION_OF_AXIN	55	0.488051	1.57482	0.0124827	0.0746859	0.0552764	10262	tags=51%, list=29%, signal=36%	PSMD4/PSMB4/PSMB3/SEM1/UBA52/PSMB6/PSMB9/RPS27A/PSMB8/PSME2/PSMB1/PSMD13/PSMB7/PSMC4/PSMC5/PSMC3/PSMD14/PSMA4/PSMB2/PSMB5/PSMA7/PSMD8/PSMA3/PSMA5/AXIN1/PSMA1/PSMB11/PSMA2
REACTOME_REGULATION_OF_RUNX3_EXPRESSION_AND_ACTIVITY	REACTOME_REGULATION_OF_RUNX3_EXPRESSION_AND_ACTIVITY	55	0.486852	1.57095	0.0124827	0.0746859	0.0552764	10262	tags=51%, list=29%, signal=36%	PSMD4/PSMB4/CDKN2A/PSMB3/SEM1/UBA52/PSMB6/PSMB9/RPS27A/PSMB8/PSME2/PSMB1/PSMD13/PSMB7/PSMC4/PSMC5/PSMC3/PSMD14/SRC/PSMA4/PSMB2/PSMB5/PSMA7/PSMD8/PSMA3/PSMA5/PSMA1/PSMA2
REACTOME_HIV_INFECTION	REACTOME_HIV_INFECTION	231	0.351711	1.36561	0.0124858	0.0746859	0.0552764	10438	tags=38%, list=29%, signal=27%	AP1M2/PSMD4/VPS28/PSMB4/ELOB/POLR2J/HMGA1/ELOC/PSMB3/POLR2I/SEM1/NELFE/TAF10/AP2S1/POLR2H/UBA52/BANF1/POLR2K/RBX1/HLA-A/CHMP2A/CD8B/PSMB6/POLR2L/ARF1/PSMB9/CHMP4A/MVB12A/PPIA/RPS27A/RANGAP1/PSMB8/PSME2/PSMB1/RANBP1/GTF2H5/PSMD13/PSMB7/PSMC4/POLR2G/ELOA2/NUP93/PSMC5/POLR2F/CHMP4C/PSMC3/PSMD14/SLC25A6/GTF2E2/RAC1/RAN/CHMP4B/NUP62/NPM1/ERCC2/NUP210/CDK7/NELFB/PSMA4/GTF2F2/PSMB2/RAE1/NUP43/PSMB5/TAF1…
KEGG_BUTANOATE_METABOLISM	KEGG_BUTANOATE_METABOLISM	34	-0.480972	-1.63717	0.0125	0.0746859	0.0552764	3947	tags=47%, list=11%, signal=42%	ACADS/ALDH7A1/ALDH2/BDH1/BDH2/ALDH5A1/ALDH1B1/ACAT1/HMGCS1/HMGCS2/L2HGDH/ACSM2A/ABAT/ACSM5/EHHADH/ACSM3
REACTOME_NEGATIVE_REGULATION_OF_FGFR2_SIGNALING	REACTOME_NEGATIVE_REGULATION_OF_FGFR2_SIGNALING	34	-0.47482	-1.61623	0.0125	0.0746859	0.0552764	7730	tags=47%, list=22%, signal=37%	BRAF/MAPK1/FGF1/CBL/SPRY2/PPP2CB/FGFR2/FGF16/PTPN11/FRS2/FGF18/FGF2/FGF20/FGF7/FGF23/FGF5
WP_FATTY_ACID_BETA_OXIDATION	WP_FATTY_ACID_BETA_OXIDATION	34	-0.475272	-1.61777	0.0125	0.0746859	0.0552764	7054	tags=56%, list=20%, signal=45%	HADHA/GK/CRAT/LIPC/GCDH/ACADS/LPL/SLC25A20/DLD/HADHB/ACAT1/ACSL5/ACADL/LIPE/CPT2/ACSL6/ACSL1/CPT1A/ACADM
WP_INSULIN_SIGNALING	WP_INSULIN_SIGNALING	159	-0.321097	-1.40941	0.0125	0.0746859	0.0552764	8746	tags=45%, list=24%, signal=34%	PIK3R3/RHOJ/MINK1/MAPK8/ARF6/KIF3A/CBLB/GSK3B/RPS6KB1/SOCS3/SLC2A4/MAP3K13/PTEN/GRB10/AKT1/MAPK1/SGK1/RAPGEF1/CBL/INSR/EIF4E/PRKCQ/PIK3CB/STXBP3/SNAP23/MAP4K5/MAP3K1/PRKCZ/PRKCB/MAPK6/MAP3K3/PIK3C3/STXBP1/MAP2K1/MAP3K2/PRKAA1/CYTH3/PFKM/MAP3K14/PRKCA/SGK2/IRS2/MAP4K3/PTPRF/MAP2K6/SOS1/PIK3CA/PTPN11/RPS6KA6/PDPK1/MTOR/ENPP1/MAPK4/RPS6KA5/EGR1/IRS1/SOS2/PIK3R4/PRKCH/TBC1D4/PIK3C2A/LIPE/GAB1/PIK3C2G…
WP_REGULATORY_CIRCUITS_OF_THE_STAT3_SIGNALING_PATHWAY	WP_REGULATORY_CIRCUITS_OF_THE_STAT3_SIGNALING_PATHWAY	78	-0.381044	-1.50631	0.0125523	0.0748105	0.0553685	6471	tags=35%, list=18%, signal=28%	RICTOR/IL20RB/PRKCB/MAPK6/IFNLR1/PDGFRB/IFNAR1/CREBBP/IL5RA/JAK2/MTOR/MPL/MAPK4/JAK1/CSF2RB/AGTR2/IL9R/IL6ST/SETD7/F2R/EGFR/IL2RB/PTPRD/IL7R/PTPRC/LIFR/GHR
REACTOME_SYNTHESIS_SECRETION_AND_DEACYLATION_OF_GHRELIN	REACTOME_SYNTHESIS_SECRETION_AND_DEACYLATION_OF_GHRELIN	19	0.637019	1.64751	0.0126382	0.0751343	0.0556082	6841	tags=53%, list=19%, signal=43%	GCG/INS/LEP/GH1/MBOAT4/PLA2G7/PCSK1/UCN/CRHR2/GHRL
REACTOME_AMINE_LIGAND_BINDING_RECEPTORS	REACTOME_AMINE_LIGAND_BINDING_RECEPTORS	42	-0.465713	-1.6684	0.0130293	0.0772661	0.057186	3069	tags=36%, list=9%, signal=33%	HTR1B/HTR1E/HTR7/HTR2B/HTR4/ADRA2A/HRH2/ADRA1B/HTR1D/CHRM4/HRH4/TAAR1/DRD1/ADRA1A/CHRM2
REACTOME_ERCC6_CSB_AND_EHMT2_G9A_POSITIVELY_REGULATE_RRNA_EXPRESSION	REACTOME_ERCC6_CSB_AND_EHMT2_G9A_POSITIVELY_REGULATE_RRNA_EXPRESSION	74	0.465423	1.58213	0.0131406	0.0776667	0.0574825	9202	tags=49%, list=26%, signal=36%	H3C7/H2AC20/H2BC10/H3C11/H3C14/H3C4/H2AC18/H2BC9/H2AX/H2BU1/H2AC14/H2AB1/H4C13/H4C11/H4C2/H2AC4/H4C5/H2AJ/H4C4/H2AC7/H2AC19/MBD3/EHMT2/H4C14/H4C15/H2AZ1/H4C1/H4C6/H2BC3/MTA3/HDAC2/H2BC14/H2BC17/H2BC11/H2AC8/HDAC1
REACTOME_DNA_STRAND_ELONGATION	REACTOME_DNA_STRAND_ELONGATION	32	0.574787	1.67417	0.0132159	0.0776667	0.0574825	10374	tags=59%, list=29%, signal=42%	CDC45/RFC4/GINS2/GINS1/MCM5/MCM7/POLD1/MCM2/DNA2/POLA2/MCM4/RFC2/POLD2/LIG1/MCM6/FEN1/RPA3/PCNA/MCM3
BIOCARTA_LAIR_PATHWAY	BIOCARTA_LAIR_PATHWAY	17	-0.610372	-1.73596	0.0132275	0.0776667	0.0574825	6658	tags=59%, list=19%, signal=48%	C3/C5/TNF/KNG1/ITGB1/VCAM1/SELP/ITGA4/C6/C7
WP_CELLS_AND_MOLECULES_INVOLVED_IN_LOCAL_ACUTE_INFLAMMATORY_RESPONSE	WP_CELLS_AND_MOLECULES_INVOLVED_IN_LOCAL_ACUTE_INFLAMMATORY_RESPONSE	17	-0.610372	-1.73596	0.0132275	0.0776667	0.0574825	6658	tags=59%, list=19%, signal=48%	C3/C5/TNF/KNG1/ITGB1/VCAM1/SELP/ITGA4/C6/C7
BIOCARTA_CARDIACEGF_PATHWAY	BIOCARTA_CARDIACEGF_PATHWAY	18	-0.587251	-1.71432	0.0133333	0.0780952	0.0577997	6637	tags=56%, list=19%, signal=45%	ADAM12/EDN1/PRKCB/PRKCA/EDNRA/NFKB1/AGTR2/EDNRB/EGFR/FOS
REACTOME_ACTIVATED_PKN1_STIMULATES_TRANSCRIPTION_OF_AR_ANDROGEN_RECEPTOR_REGULATED_GENES_KLK2_AND_KLK3	REACTOME_ACTIVATED_PKN1_STIMULATES_TRANSCRIPTION_OF_AR_ANDROGEN_RECEPTOR_REGULATED_GENES_KLK2_AND_KLK3	65	0.487577	1.61739	0.0135318	0.0790629	0.0585159	9191	tags=52%, list=26%, signal=39%	KLK3/KLK2/H3C7/H2AC20/H2BC10/H3C11/H3C14/H3C4/H2AC18/H2BC9/H2AX/H2BU1/PKN1/H2AC14/H2AB1/H4C13/H4C11/H4C2/H2AC4/H4C5/H2AJ/H4C4/H2AC7/H2AC19/H4C14/H4C15/H2AZ1/H4C1/H4C6/H2BC3/H2BC14/H2BC17/H2BC11/H2AC8
REACTOME_PRESYNAPTIC_DEPOLARIZATION_AND_CALCIUM_CHANNEL_OPENING	REACTOME_PRESYNAPTIC_DEPOLARIZATION_AND_CALCIUM_CHANNEL_OPENING	11	0.724417	1.649	0.0136986	0.0793796	0.0587502	6757	tags=64%, list=19%, signal=52%	CACNG4/CACNA2D3/CACNA1E/CACNA1B/CACNG2/CACNB1/CACNA1A
REACTOME_APC_CDC20_MEDIATED_DEGRADATION_OF_NEK2A	REACTOME_APC_CDC20_MEDIATED_DEGRADATION_OF_NEK2A	26	0.601351	1.67097	0.0137195	0.0793796	0.0587502	8774	tags=46%, list=25%, signal=35%	UBE2C/UBE2S/CDC20/NEK2/ANAPC11/UBA52/BUB1B/ANAPC7/RPS27A/MAD2L1/CDC16/UBE2E1
REACTOME_FORMATION_OF_TUBULIN_FOLDING_INTERMEDIATES_BY_CCT_TRIC	REACTOME_FORMATION_OF_TUBULIN_FOLDING_INTERMEDIATES_BY_CCT_TRIC	26	0.602391	1.67386	0.0137195	0.0793796	0.0587502	8928	tags=62%, list=25%, signal=46%	TUBA3E/TUBA3C/TUBAL3/TUBA4B/CCT3/TUBA4A/TUBB4B/TUBA3D/TUBB4A/TUBA1C/TUBB2B/TUBA1A/CCT6A/CCT5/TUBB2A/CCT7
REACTOME_INSULIN_RECEPTOR_RECYCLING	REACTOME_INSULIN_RECEPTOR_RECYCLING	26	0.59942	1.66561	0.0137195	0.0793796	0.0587502	7873	tags=50%, list=22%, signal=39%	ATP6V1G3/INS/ATP6V0D2/ATP6V1B1/ATP6V0A4/ATP6V0B/ATP6V1F/TCIRG1/ATP6V1C2/ATP6V0E1/ATP6V1C1/ATP6AP1/ATP6V1E1
BIOCARTA_MTOR_PATHWAY	BIOCARTA_MTOR_PATHWAY	22	-0.536074	-1.66817	0.0138122	0.0793937	0.0587607	8205	tags=64%, list=23%, signal=49%	RPS6KB1/PTEN/EIF4A2/AKT1/EIF4G2/EIF4E/EIF4G3/EIF3A/PIK3CA/PDPK1/MTOR/PDK2/SHLD2P3/PIK3R1
WP_FATTY_ACID_BIOSYNTHESIS	WP_FATTY_ACID_BIOSYNTHESIS	22	-0.539026	-1.67736	0.0138122	0.0793937	0.0587607	9762	tags=64%, list=27%, signal=46%	ACSS2/HADH/ECHDC3/FASN/ECHDC1/SCD/PECR/ECHDC2/PC/ACSL5/ACACB/ACSL6/ACSL1/ACAA2
PID_IL6_7_PATHWAY	PID_IL6_7_PATHWAY	47	-0.456204	-1.6624	0.0138408	0.0793937	0.0587607	4271	tags=28%, list=12%, signal=24%	MAP2K6/SOS1/JAK2/PIK3CA/PTPN11/JAK1/IL6ST/MITF/GAB1/FOXO1/PIK3R1/FOS/TNFSF11
PID_AJDISS_2PATHWAY	PID_AJDISS_2PATHWAY	48	-0.44564	-1.62788	0.0138889	0.0793937	0.0587607	6598	tags=42%, list=18%, signal=34%	SNX1/GFRA1/ADAM10/CTNNB1/RIN2/DSP/CREBBP/CDH2/ZBTB33/FYN/IQGAP1/MET/BDNF/RET/CTNND1/EGFR/TIAM1/CDH1/MEP1B/NTRK2
REACTOME_IRS_MEDIATED_SIGNALLING	REACTOME_IRS_MEDIATED_SIGNALLING	48	-0.442114	-1.615	0.0138889	0.0793937	0.0587607	6630	tags=50%, list=19%, signal=41%	PIK3CB/KRAS/PIK3C3/FGFR2/FGF16/IRS2/FLT3/SOS1/PIK3CA/PTPN11/PDPK1/FRS2/IRS1/FGF18/PIK3R4/GAB1/FGF2/PDE3B/FGF20/PIK3R1/FGF7/FGF23/KL/FGF5
WP_DNA_DAMAGE_RESPONSE_ONLY_ATM_DEPENDENT	WP_DNA_DAMAGE_RESPONSE_ONLY_ATM_DEPENDENT	110	-0.343064	-1.43434	0.0141509	0.0806977	0.0597258	7589	tags=45%, list=21%, signal=35%	PIK3R3/CDKN1A/PIK3R5/MAPK8/GSK3B/SMAD3/PTEN/AKT1/SMAD4/MAPK1/WNT3/PPP2R5E/INSR/PIK3CB/KRAS/CDKN1B/MAP3K1/PIK3C3/WNT16/CTNNB1/MDM2/WNT11/NFKB1/AKT3/SOS1/ATM/PIK3CA/CCND1/CCNG2/BCL2L11/BCL2/IRS1/LDLR/SOS2/APC/PIK3R4/PIK3C2A/PCK2/PIK3C2G/G6PC/ERBB2/CAT/PIK3R1/SCP2/WNT5B/PIK3CG/RBL2/WNT2/WNT7A
REACTOME_CARBOXYTERMINAL_POST_TRANSLATIONAL_MODIFICATIONS_OF_TUBULIN	REACTOME_CARBOXYTERMINAL_POST_TRANSLATIONAL_MODIFICATIONS_OF_TUBULIN	43	0.517061	1.60874	0.0142857	0.0808862	0.0598653	6920	tags=35%, list=19%, signal=28%	TUBA3E/TUBA3C/TUBB8/TUBAL3/TUBA4B/TUBA4A/TTLL4/TUBB8B/TUBB4B/TUBA3D/TUBB4A/TUBA1C/TUBB2B/TPGS1/TUBA1A
BIOCARTA_CTCF_PATHWAY	BIOCARTA_CTCF_PATHWAY	24	-0.546493	-1.71592	0.0143266	0.0808862	0.0598653	9004	tags=67%, list=25%, signal=50%	TGFB2/TGFBR1/CTCF/RPS6KB1/PTEN/SMAD4/TGFB3/CDKN1B/MDM2/PIK3CA/MTOR/TGFBR2/TGFBR3/PIK3R1/SMAD1/PIK3CG
BIOCARTA_TPO_PATHWAY	BIOCARTA_TPO_PATHWAY	24	-0.546926	-1.71728	0.0143266	0.0808862	0.0598653	6187	tags=50%, list=17%, signal=41%	PRKCB/MAP2K1/STAT5B/PRKCA/SOS1/JAK2/PIK3CA/MPL/RASA1/PIK3R1/PIK3CG/FOS
BIOCARTA_CFTR_PATHWAY	BIOCARTA_CFTR_PATHWAY	11	-0.690822	-1.77726	0.0143541	0.0808862	0.0598653	631	tags=55%, list=2%, signal=54%	PRKAR2A/PRKACB/PRKAR1A/ADRB2/ADCY1/CFTR
REACTOME_DERMATAN_SULFATE_BIOSYNTHESIS	REACTOME_DERMATAN_SULFATE_BIOSYNTHESIS	11	-0.68948	-1.77381	0.0143541	0.0808862	0.0598653	3044	tags=55%, list=9%, signal=50%	DSE/NCAN/VCAN/UST/DCN/DSEL
REACTOME_REPRODUCTION	REACTOME_REPRODUCTION	143	0.408608	1.51805	0.0144404	0.0809504	0.0599129	7256	tags=34%, list=20%, signal=27%	ZP1/PRDM9/CATSPERD/H3C7/H2AC20/H2BC10/H3C11/H3C14/H3C4/IZUMO2/H2AC18/ZP3/LMNA/FKBP6/ADAM2/CATSPER1/H2BC9/ADAM30/SYCP1/SPAM1/H2AX/H3-4/SYCP2/H2BU1/MND1/H2AC14/H2AB1/SYCE1/BLM/H4C13/H4C11/CATSPER4/H4C2/H2AC4/RAD51/ACD/IZUMO1/H4C5/H2AJ/H4C4/H2AC7/H2AC19/H4C14/PSMC3IP/H4C15/H2AZ1/ZP4/UBE2I/REC8
REACTOME_EPIGENETIC_REGULATION_OF_GENE_EXPRESSION	REACTOME_EPIGENETIC_REGULATION_OF_GENE_EXPRESSION	146	0.399861	1.48886	0.0144753	0.0809504	0.0599129	9924	tags=44%, list=28%, signal=32%	H3C7/H2AC20/H2BC10/H3C11/H3C14/H3C4/H2AC18/H2BC9/H2AX/CD3EAP/H2BU1/ZNRD1/H2AC14/PHF19/H2AB1/H4C13/H4C11/KAT2A/POLR2H/H4C2/H2AC4/POLR2K/DNMT3B/H4C5/POLR2L/H2AJ/H4C4/PHF1/H2AC7/H2AC19/POLR1C/GTF2H5/MBD3/SAP30/ACTB/EHMT2/H4C14/POLR2F/H4C15/MYBBP1A/H2AZ1/EZH2/TET1/H4C1/ERCC2/UHRF1/H4C6/H2BC3/TAF1D/CDK7/MTA3/SAP30BP/HDAC2/SAP18/H2BC14/H2BC17/SUV39H1/H2BC11/H2AC8/HDAC1/TAF1A/POLR1D/H3-3A/EED
KEGG_VASCULAR_SMOOTH_MUSCLE_CONTRACTION	KEGG_VASCULAR_SMOOTH_MUSCLE_CONTRACTION	114	-0.350064	-1.46649	0.0145631	0.0809504	0.0599129	7952	tags=46%, list=22%, signal=36%	ROCK2/PRKACB/BRAF/PTGIR/GNA13/ADCY4/MAPK1/PLA2G4B/ADCY6/ITPR3/NPR1/PRKCQ/ADCY3/CACNA1D/PRKCB/MAP2K1/PLCB4/GNAQ/RAMP3/PPP1R12A/PRKCA/GUCY1B1/PPP1R12B/CALML3/NPR2/EDNRA/GUCY1A1/ADCY7/PRKG1/JMJD7-PLA2G4B/ADCY9/PLA2G12A/PRKCE/PRKCH/MYH11/PLA2G4A/ARHGEF12/KCNMA1/CACNA1C/ROCK1/CALD1/ITPR2/ITPR1/GUCY1A2/CALCRL/CYP4A11/ADRA1B/AVPR1A/MYLK/ADCY1/CYP4A22/ADRA1A
WP_OSTEOBLAST_DIFFERENTIATION	WP_OSTEOBLAST_DIFFERENTIATION	118	-0.343189	-1.44799	0.0145631	0.0809504	0.0599129	7566	tags=47%, list=21%, signal=37%	SMAD4/MAPK1/WNT3/FGF1/FZD5/DLL1/FZD3/RUNX2/PRKCQ/PIK3CB/BMP2/PRKCZ/PRKCB/MAPK6/PIK3C3/HEY2/BMP4/WNT16/CTNNB1/FGFR2/PRKCA/FZD1/NOTCH4/PRKD1/WNT11/PIK3CA/LRP5/SMAD9/NOTCH3/MAPK4/PRKCE/FZD4/FZD8/FGF18/BMPR2/PTCH1/PIK3R4/PRKCH/PIK3C2A/PIK3C2G/NOTCH2/FGF2/GLI2/LRP6/PIK3R1/SMAD1/FGF7/WNT5B/BMPR1B/PIK3CG/WNT2/WNT8B/WNT9B/FGF5/WNT7A
WP_LIVER_X_RECEPTOR_PATHWAY	WP_LIVER_X_RECEPTOR_PATHWAY	10	-0.713378	-1.76344	0.0145985	0.0809504	0.0599129	3292	tags=70%, list=9%, signal=64%	FASN/SCD/CYP7A1/ABCG5/ABCG8/CYP3A4/CYP2B6
REACTOME_MISCELLANEOUS_SUBSTRATES	REACTOME_MISCELLANEOUS_SUBSTRATES	12	-0.658825	-1.74562	0.0147059	0.0809504	0.0599129	2346	tags=58%, list=7%, signal=55%	CYP2U1/CYP4F3/CYP4A11/CYP4B1/CYP4F2/CYP3A43/CYP4A22
REACTOME_P2Y_RECEPTORS	REACTOME_P2Y_RECEPTORS	12	-0.647163	-1.71472	0.0147059	0.0809504	0.0599129	2947	tags=67%, list=8%, signal=61%	P2RY1/LPAR4/P2RY14/P2RY13/P2RY12/P2RY10/GPR17/P2RY4
REACTOME_TRANSPORT_OF_ORGANIC_ANIONS	REACTOME_TRANSPORT_OF_ORGANIC_ANIONS	12	-0.6539	-1.73257	0.0147059	0.0809504	0.0599129	6287	tags=83%, list=18%, signal=69%	SLCO3A1/SLCO1B3/SLCO1C1/SLCO4C1/ALB/SLCO2A1/SLCO1A2/SLC16A2/SLCO2B1/SLCO1B1
WP_BIOMARKERS_FOR_UREA_CYCLE_DISORDERS	WP_BIOMARKERS_FOR_UREA_CYCLE_DISORDERS	12	-0.642467	-1.70228	0.0147059	0.0809504	0.0599129	6835	tags=58%, list=19%, signal=47%	ASL/GPT/ARG1/ASS1/OTC/GATM/GLS2
WP_PROXIMAL_TUBULE_TRANSPORT	WP_PROXIMAL_TUBULE_TRANSPORT	57	-0.411189	-1.54806	0.0147059	0.0809504	0.0599129	1781	tags=30%, list=5%, signal=28%	SLC16A10/SLC5A2/SLC34A1/ABCB1/ABCG2/SLC22A7/AQP1/SLC1A1/CA2/SLC22A2/SLC2A2/CA4/SLC6A20/SLC4A4/CLTRN/SLC3A1/SLC5A1
PID_ENDOTHELIN_PATHWAY	PID_ENDOTHELIN_PATHWAY	63	-0.395676	-1.52044	0.0148148	0.0812947	0.0601676	7589	tags=48%, list=21%, signal=38%	AKT1/ADCY4/MAPK1/ADCY6/PRKCQ/ADCY3/EDN1/PRKCB/COL1A2/MAP2K1/GNAQ/CYSLTR2/TRPC6/PRKCA/EDNRA/ADCY7/JAK2/ADCY9/PTK2B/PRKCE/EDNRB/PRKCH/PLA2G4A/CYSLTR1/COL3A1/GNA14/FOS/ADCY1/EDN2/GNAO1
PID_NECTIN_PATHWAY	PID_NECTIN_PATHWAY	30	-0.524365	-1.72058	0.0148368	0.0812947	0.0601676	7340	tags=50%, list=20%, signal=40%	ITGAV/RAPGEF1/RAP1B/FARP2/CTNNB1/AFDN/PDGFRB/CLDN1/PIK3CA/IQGAP1/PTPRM/NECTIN3/CDH1/PIK3R1/ITGB3
WP_ONCOSTATIN_M_SIGNALING_PATHWAY	WP_ONCOSTATIN_M_SIGNALING_PATHWAY	65	-0.396825	-1.53371	0.0152091	0.0831432	0.0615358	8467	tags=52%, list=24%, signal=40%	MAPK8/STAT1/CREB1/SOCS3/CASP7/AKT1/MAPK1/HIF1A/KRAS/RICTOR/CDKN1B/PRKCB/MAP2K1/STAT5B/PRKCA/NFKB1/SOS1/JAK2/PTPN11/MTOR/PTK2B/JAK1/EGR1/IRS1/PRKCE/LDLR/IL6ST/PRKCH/CCL2/CCN1/PIK3R1/FOS/LIFR/TIMP3
WP_PTF1A_RELATED_REGULATORY_PATHWAY	WP_PTF1A_RELATED_REGULATORY_PATHWAY	11	0.719128	1.63696	0.015411	0.0840533	0.0622094	1451	tags=36%, list=4%, signal=35%	RBPJL/PTF1A/NKX6-1/PDX1
WP_HOSTPATHOGEN_INTERACTION_OF_HUMAN_CORONA_VIRUSES_INTERFERON_INDUCTION	WP_HOSTPATHOGEN_INTERACTION_OF_HUMAN_CORONA_VIRUSES_INTERFERON_INDUCTION	33	-0.483325	-1.62641	0.015528	0.0843047	0.0623954	11241	tags=73%, list=31%, signal=50%	OAS1/TRAF3/TLR7/TYK2/MAPK14/RIPK1/IRF9/IFNAR2/MAPK8/STAT1/TBK1/CHUK/STAT2/DDX58/IFIH1/OAS2/EIF2AK2/TRAF6/IFNAR1/MYD88/NFKB1/OAS3/JAK1/FOS
WP_MONOAMINE_GPCRS	WP_MONOAMINE_GPCRS	33	-0.503931	-1.69575	0.015528	0.0843047	0.0623954	3069	tags=39%, list=9%, signal=36%	HTR1B/HTR1E/HTR7/HTR2B/HTR4/ADRA2A/HRH2/ADRA1B/HTR1D/CHRM4/DRD1/ADRA1A/CHRM2
REACTOME_B_WICH_COMPLEX_POSITIVELY_REGULATES_RRNA_EXPRESSION	REACTOME_B_WICH_COMPLEX_POSITIVELY_REGULATES_RRNA_EXPRESSION	89	0.439634	1.53116	0.0157895	0.0850136	0.0629201	9884	tags=51%, list=28%, signal=37%	H3C7/H2AC20/H2BC10/H3C11/H3C14/H3C4/H2AC18/H2BC9/H2AX/CD3EAP/H2BU1/ZNRD1/H2AC14/H2AB1/H4C13/H4C11/KAT2A/POLR2H/H4C2/H2AC4/POLR2K/H4C5/POLR2L/H2AJ/H4C4/H2AC7/H2AC19/POLR1C/ACTB/H4C14/POLR2F/H4C15/MYBBP1A/H2AZ1/H4C1/H4C6/H2BC3/TAF1D/H2BC14/H2BC17/H2BC11/H2AC8/TAF1A/POLR1D/H3-3A
REACTOME_DNA_DAMAGE_TELOMERE_STRESS_INDUCED_SENESCENCE	REACTOME_DNA_DAMAGE_TELOMERE_STRESS_INDUCED_SENESCENCE	80	0.446611	1.52811	0.0158311	0.0850136	0.0629201	9718	tags=49%, list=27%, signal=36%	HMGA2/H2AC20/H2BC10/H2AC18/H2BC9/HMGA1/H2AX/H3-4/H2BU1/H2AC14/H2AB1/H4C13/H4C11/H4C2/H2AC4/ACD/H4C5/H1-2/H2AJ/H4C4/H1-1/H2AC7/H2AC19/CCNA1/H1-5/H1-4/H4C14/H4C15/H2AZ1/H4C1/H4C6/H2BC3/H2BC14/H2BC17/H2BC11/H2AC8/CCNA2/H1-3/ASF1A
REACTOME_PRC2_METHYLATES_HISTONES_AND_DNA	REACTOME_PRC2_METHYLATES_HISTONES_AND_DNA	71	0.4681	1.57941	0.015852	0.0850136	0.0629201	9191	tags=49%, list=26%, signal=37%	H3C7/H2AC20/H2BC10/H3C11/H3C14/H3C4/H2AC18/H2BC9/H2AX/H2BU1/H2AC14/PHF19/H2AB1/H4C13/H4C11/H4C2/H2AC4/DNMT3B/H4C5/H2AJ/H4C4/PHF1/H2AC7/H2AC19/H4C14/H4C15/H2AZ1/EZH2/H4C1/H4C6/H2BC3/H2BC14/H2BC17/H2BC11/H2AC8
WP_AMPLIFICATION_AND_EXPANSION_OF_ONCOGENIC_PATHWAYS_AS_METASTATIC_TRAITS	WP_AMPLIFICATION_AND_EXPANSION_OF_ONCOGENIC_PATHWAYS_AS_METASTATIC_TRAITS	17	-0.595459	-1.69355	0.015873	0.0850136	0.0629201	4226	tags=53%, list=12%, signal=47%	TCF7L2/CYTIP/POSTN/VHL/TNC/EPAS1/VCAM1/PIK3CG/WNT2
WP_MITOCHONDRIAL_LCFATTY_ACID_BETAOXIDATION	WP_MITOCHONDRIAL_LCFATTY_ACID_BETAOXIDATION	17	-0.603957	-1.71772	0.015873	0.0850136	0.0629201	2439	tags=76%, list=7%, signal=71%	ACSF2/HADH/HADHA/PECR/ACADS/SLC25A20/ACADL/CPT2/ACSL1/CPT1A/SCP2/ACADM/EHHADH
WP_PYRIMIDINE_METABOLISM_AND_RELATED_DISEASES	WP_PYRIMIDINE_METABOLISM_AND_RELATED_DISEASES	17	-0.594531	-1.69091	0.015873	0.0850136	0.0629201	2739	tags=35%, list=8%, signal=33%	UPB1/DPYS/CPS1/DPYD/OTC/GLS2
KEGG_ERBB_SIGNALING_PATHWAY	KEGG_ERBB_SIGNALING_PATHWAY	87	-0.369493	-1.49944	0.0161943	0.0862459	0.0638321	8746	tags=47%, list=24%, signal=36%	PIK3R3/CDKN1A/PLCG1/PIK3R5/MAPK8/ARAF/CBLB/GSK3B/RPS6KB1/BRAF/AKT1/MAPK1/CBL/PIK3CB/KRAS/NCK1/CDKN1B/PRKCB/MAP2K1/STAT5B/PRKCA/CAMK2D/AKT3/SOS1/PIK3CA/PLCG2/MTOR/NRG3/AREG/SOS2/EREG/PAK5/GAB1/EGFR/TGFA/ERBB2/SHC4/PIK3R1/CAMK2B/NRG1/PIK3CG
REACTOME_APOPTOTIC_CLEAVAGE_OF_CELLULAR_PROTEINS	REACTOME_APOPTOTIC_CLEAVAGE_OF_CELLULAR_PROTEINS	38	-0.455217	-1.60235	0.0163399	0.0862459	0.0638321	7763	tags=47%, list=22%, signal=37%	PKP1/CASP7/STK24/PRKCQ/BIRC2/CTNNB1/TJP2/DSP/GAS2/DSG2/TJP1/APC/BMX/ROCK1/SATB1/CDH1/OCLN/DSG1
REACTOME_POSITIVE_EPIGENETIC_REGULATION_OF_RRNA_EXPRESSION	REACTOME_POSITIVE_EPIGENETIC_REGULATION_OF_RRNA_EXPRESSION	104	0.437283	1.54897	0.0163728	0.0862459	0.0638321	9884	tags=48%, list=28%, signal=35%	H3C7/H2AC20/H2BC10/H3C11/H3C14/H3C4/H2AC18/H2BC9/H2AX/CD3EAP/H2BU1/ZNRD1/H2AC14/H2AB1/H4C13/H4C11/KAT2A/POLR2H/H4C2/H2AC4/POLR2K/H4C5/POLR2L/H2AJ/H4C4/H2AC7/H2AC19/POLR1C/MBD3/ACTB/EHMT2/H4C14/POLR2F/H4C15/MYBBP1A/H2AZ1/H4C1/H4C6/H2BC3/TAF1D/MTA3/HDAC2/H2BC14/H2BC17/H2BC11/H2AC8/HDAC1/TAF1A/POLR1D/H3-3A
BIOCARTA_IGF1_PATHWAY	BIOCARTA_IGF1_PATHWAY	21	-0.526202	-1.61538	0.0163934	0.0862459	0.0638321	4187	tags=43%, list=12%, signal=38%	MAP2K1/SOS1/PIK3CA/PTPN11/IRS1/RASA1/PIK3R1/PIK3CG/FOS
PID_ECADHERIN_KERATINOCYTE_PATHWAY	PID_ECADHERIN_KERATINOCYTE_PATHWAY	21	-0.528106	-1.62122	0.0163934	0.0862459	0.0638321	5629	tags=43%, list=16%, signal=36%	CTNNB1/AJUBA/PIK3CA/FYN/CTNND1/EGFR/CDH1/PIK3R1/CASR
REACTOME_COPI_INDEPENDENT_GOLGI_TO_ER_RETROGRADE_TRAFFIC	REACTOME_COPI_INDEPENDENT_GOLGI_TO_ER_RETROGRADE_TRAFFIC	53	0.491096	1.58371	0.0164384	0.0862459	0.0638321	7665	tags=34%, list=21%, signal=27%	TUBA3E/TUBA3C/PAFAH1B3/TUBB8/TUBAL3/TUBA4B/CAPZA3/TUBA4A/TUBB8B/TUBB4B/DYNLL1/TUBA3D/TUBB4A/TUBA1C/TUBB2B/TUBA1A/PLA2G6/RAB6B
REACTOME_CA_DEPENDENT_EVENTS	REACTOME_CA_DEPENDENT_EVENTS	37	-0.452797	-1.56491	0.0165017	0.0862459	0.0638321	8718	tags=57%, list=24%, signal=43%	CAMKK2/ADCY5/PRKAR2A/CREB1/PRKACB/ADCY4/MAPK1/ADCY6/PRKAR1A/ADCY3/PDE1A/PRKCA/CAMK2D/ADCY7/ADCY9/PLA2G4A/CAMK4/NBEA/CAMK2B/ADCY1/PDE1C
WP_NEOVASCULARISATION_PROCESSES	WP_NEOVASCULARISATION_PROCESSES	37	-0.453633	-1.5678	0.0165017	0.0862459	0.0638321	9004	tags=51%, list=25%, signal=38%	TGFB2/TGFBR1/MAPK8/ANGPT1/SMAD3/AKT1/MAPK1/HIF1A/TGFB3/FLT4/NOTCH4/NFKB1/SMAD9/NOTCH3/REL/KIT/SMAD1/CXCL12/KDR
BIOCARTA_AKT_PATHWAY	BIOCARTA_AKT_PATHWAY	22	-0.515127	-1.60299	0.0165746	0.0862459	0.0638321	4610	tags=45%, list=13%, signal=40%	CHUK/AKT1/FOXO4/NFKB1/PIK3CA/PDPK1/FOXO1/PIK3R1/PIK3CG/GHR
KEGG_AXON_GUIDANCE	KEGG_AXON_GUIDANCE	129	-0.335538	-1.43233	0.0165746	0.0862459	0.0638321	5531	tags=30%, list=15%, signal=26%	NRP1/SRGAP1/EFNA2/EPHB1/EFNB2/ABLIM1/CFL2/EPHA1/SLIT3/CHP1/DPYSL2/FYN/UNC5C/PLXNC1/NFATC3/MET/SEMA3B/ROBO2/ARHGEF12/SLIT2/PAK5/ROCK1/RASA1/ITGB1/SEMA3C/EPHA4/EFNB3/CXCL12/SEMA6D/NTN3/SEMA5A/UNC5A/LRRC4C/NFAT5/NTN4/EPHA3/EPHA7/UNC5D/CHP2
REACTOME_DEFECTS_IN_VITAMIN_AND_COFACTOR_METABOLISM	REACTOME_DEFECTS_IN_VITAMIN_AND_COFACTOR_METABOLISM	22	-0.511843	-1.59277	0.0165746	0.0862459	0.0638321	9241	tags=77%, list=26%, signal=57%	MMACHC/MMAA/MMADHC/ABCD4/CUBN/PCCB/MTRR/PC/MTR/LMBRD1/PCCA/HLCS/AMN/BTD/MCCC2/MCCC1/MMUT
WP_ADIPOGENESIS	WP_ADIPOGENESIS	130	-0.34004	-1.4544	0.0165746	0.0862459	0.0638321	8716	tags=53%, list=24%, signal=40%	LPIN3/CDKN1A/ASIP/STAT1/SMAD3/KLF15/STAT6/CREB1/SOCS3/SLC2A4/CNTFR/NR2F1/BORCS8-MEF2B/MBNL1/HIF1A/SP1/NCOA2/STAT2/SCD/BMP2/BSCL2/TNF/SPOCK1/BMP4/STAT5B/CTNNB1/RB1/LPL/KLF5/GADD45B/NCOA1/FZD1/IRS2/MEF2C/LPIN1/NAMPT/AHR/KLF6/PRLR/HNF1A/KLF7/PPARGC1A/NR3C1/IRS1/SFRP4/NCOR1/PPARA/EPAS1/IL6ST/PNPLA3/PCK2/LIPE/FOXO1/MEF2A/RORA/GADD45A/PLIN1/BMP3/NRIP1/FAS/LPIN2/PCK1/WNT5B/EGR2/RBL2/LIFR/ADIPOQ/PTGIS/CY…
WP_COMPLEMENT_ACTIVATION	WP_COMPLEMENT_ACTIVATION	22	-0.519055	-1.61521	0.0165746	0.0862459	0.0638321	6658	tags=55%, list=19%, signal=44%	C3/C5/C1R/C4A/C4B/C1S/C8B/CFP/C8A/MASP1/C6/C7
REACTOME_PLATELET_HOMEOSTASIS	REACTOME_PLATELET_HOMEOSTASIS	85	-0.381682	-1.53375	0.0166667	0.0863471	0.063907	7793	tags=47%, list=22%, signal=37%	P2RX7/GNG7/ATP2B2/PTGIR/ATP2A2/PPP2R5E/GNG2/ITPR3/PECAM1/GNB5/GNG12/NOS3/PDE1A/PPP2CB/TRPC6/GNG10/P2RX1/GUCY1B1/PPP2R1B/SLC8A1/TRPC3/GUCY1A1/PTPN11/PRKG1/PAFAH2/PLA2G4A/PDE5A/APOB/KCNMA1/SLC8A3/ITPR2/ITPR1/GUCY1A2/PDE2A/NOS2/P2RX3/PDE10A/PDE11A/NOS1/P2RX2
WP_VEGFAVEGFR2_SIGNALING_PATHWAY	WP_VEGFAVEGFR2_SIGNALING_PATHWAY	431	-0.289012	-1.41919	0.0166667	0.0863471	0.063907	7818	tags=35%, list=22%, signal=27%	ADAM9/IGFBP7/PTPRJ/CAV1/EIF2AK3/GRB10/AKT1/CLTC/NFATC2/MAPK1/EPS15/ASCC3/ITGAV/FLNB/FHL2/MYH9/SRP54/FOXO4/RAPGEF1/EPHA2/GLUD1/PNP/CBL/RAP1B/EIF4G2/PPP3CA/EIF4E/GIGYF2/GJA1/LARP7/RICTOR/ARHGEF15/BMP2/PTPN9/NCK1/PRKCZ/PRKCB/DHX36/NOS3/MAP2K1/ADAM10/QKI/PRKAA1/ADRB2/CTNNB1/FBXW11/F3/ACKR3/AFDN/NRP2/PRKCA/EPB41/TMOD3/MDM2/NOTCH4/MEF2C/RCAN2/TMEM170A/MICAL2/ENG/PRKD1/AMOT/TXNIP/SLC8A1/NFKB1/DNAJB9/CRE…
ST_INTEGRIN_SIGNALING_PATHWAY	ST_INTEGRIN_SIGNALING_PATHWAY	82	-0.366815	-1.46415	0.0168776	0.0868417	0.0642731	7955	tags=41%, list=22%, signal=32%	PTEN/ROCK2/ITGA11/CAV1/BRAF/ANGPTL2/AKT1/MAPK1/ITGA7/RAPGEF1/ACTR2/ARHGAP35/PIK3CB/ITGA6/MAPK8IP1/ARHGAP26/ITGA8/ITGA10/AKT3/DOCK1/ITGA1/ITGA2/SOS1/PIK3CA/PLCG2/ARHGEF6/FYN/ILK/SOS2/PAK5/ROCK1/ITGA9/MYLK/ITGA4
REACTOME_SIGNALING_BY_FGFR3	REACTOME_SIGNALING_BY_FGFR3	40	-0.445974	-1.57432	0.0168919	0.0868417	0.0642731	7730	tags=50%, list=22%, signal=39%	BRAF/MAPK1/FGF1/CBL/KRAS/SPRY2/PPP2CB/FGF16/SOS1/PIK3CA/PTPN11/FRS2/FGF18/GAB1/FGF2/FGF20/PIK3R1/GALNT3/FGF23/FGF5
ST_JNK_MAPK_PATHWAY	ST_JNK_MAPK_PATHWAY	40	-0.463824	-1.63733	0.0168919	0.0868417	0.0642731	10320	tags=55%, list=29%, signal=39%	MAP2K5/ATF2/MAP2K4/MAP3K12/DUSP10/MAPK8/MAP3K13/AKT1/PAPPA/MAP3K1/MAP3K3/MAP3K2/TRAF6/NR2C2/MAP3K20/TAB2/DLD/NFATC3/GAB1/GADD45A/MAP3K5/IL1R1
REACTOME_GOLGI_TO_ER_RETROGRADE_TRANSPORT	REACTOME_GOLGI_TO_ER_RETROGRADE_TRANSPORT	134	0.408957	1.5077	0.0169082	0.0868417	0.0642731	7309	tags=34%, list=20%, signal=27%	TUBA3E/TUBA3C/PAFAH1B3/TUBB8/KLC3/TUBAL3/KIF2C/TUBA4B/KIF21B/CAPZA3/TUBA4A/TUBB8B/KIFC1/KIF3C/TMED3/TUBB4B/COPE/KIF25/KIF18B/KIF20A/USE1/DYNLL1/KIF26B/TUBA3D/TMED9/ARF1/KIF22/KIF23/KIF5A/KIF11/TUBB4A/ARFGAP1/KIF15/TUBA1C/BNIP1/KIF4A/KIF9/TUBB2B/KIF18A/COPZ1/TUBA1A/KIF12/RACGAP1/CENPE/PLA2G6
WP_ECTODERM_DIFFERENTIATION	WP_ECTODERM_DIFFERENTIATION	140	-0.317261	-1.3614	0.0169492	0.0868644	0.0642899	7271	tags=37%, list=20%, signal=30%	NARS2/FZD5/FHL2/PI4KA/ST8SIA4/BCAS3/TSC22D1/SHH/PODXL/GRAMD1B/TSKU/BCOR/SPRY2/BMP4/NUMA1/SMURF1/CTNNB1/TRIM33/ARHGEF9/FGFR2/PHF8/CDH6/PPFIBP2/TBL1X/SCHIP1/CDON/BOC/ZFHX4/WDR44/CLVS1/PAN2/FYN/NR2F2/GREB1/ZBTB16/CELSR2/FZD4/FZD8/HDAC6/NLGN1/CCL2/MYORG/PGM1/LDB2/SNCA/PTPRB/EDA2R/SOCS2/PRKAG2/PLCXD3/DMD/PTPN13
NABA_ECM_REGULATORS	NABA_ECM_REGULATORS	238	0.347187	1.34929	0.0170455	0.0871701	0.0645161	6483	tags=26%, list=18%, signal=21%	PRSS1/PRSS2/CST8/CST4/ADAM18/SERPINB3/MMP13/ADAM23/CST1/HYAL4/TMPRSS15/SERPINI2/KY/CTSV/CSTL1/MMP9/SERPINB4/SERPINA12/TGM3/CELA3B/MMP3/CSTB/KAZALD1/ITIH4/ADAM2/ADAM30/SPAM1/P3H3/ADAM32/MMP1/ITIH5/CELA1/SERPINE2/MMP26/MMP10/HPSE2/CST3/SERPINA2/SERPINH1/HMSD/MMP11/SERPINB13/TIMP1/LOXL4/ADAM15/CELA2A/TGM7/CTSA/EGLN2/CST9L/HTRA4/SERPINI1/P3H2/EGLN3/SERPINB6/P3H1/CSTA/CST2/MMP12/CELA3A/SERPINA9/TGM1
KEGG_NICOTINATE_AND_NICOTINAMIDE_METABOLISM	KEGG_NICOTINATE_AND_NICOTINAMIDE_METABOLISM	24	-0.512654	-1.60967	0.017192	0.08742	0.0647011	4504	tags=46%, list=13%, signal=40%	PNP/NMNAT1/NAMPT/NT5E/ENPP1/NUDT12/NT5C2/NMNAT2/NNT/AOX1/NT5C1B
KEGG_WNT_SIGNALING_PATHWAY	KEGG_WNT_SIGNALING_PATHWAY	150	-0.302886	-1.30992	0.0172414	0.08742	0.0647011	8467	tags=40%, list=24%, signal=31%	MAPK8/CXXC4/GSK3B/APC2/SMAD3/PRICKLE2/ROCK2/PRKACB/SENP2/SMAD4/NFATC2/CHD8/WNT3/PPP2R5E/FZD5/AXIN2/PPP3CA/FZD3/DKK4/PRKCB/PLCB4/PPP2CB/WNT16/CTNNB1/FBXW11/PRKCA/NKD1/FZD1/CAMK2D/SFRP2/TBL1X/PPP2R1B/WNT11/CREBBP/CSNK1A1L/CHP1/DAAM1/CCND1/LRP5/EP300/DKK2/NFATC3/SFRP4/FZD4/FZD8/APC/CSNK1A1/PRICKLE1/ROCK1/LRP6/CAMK2B/WNT5B/NFAT5/DAAM2/WNT2/WNT8B/WNT9B/SFRP1/CHP2/WNT7A
REACTOME_SIGNALING_BY_NTRKS	REACTOME_SIGNALING_BY_NTRKS	134	-0.311385	-1.33227	0.0172414	0.08742	0.0647011	6015	tags=31%, list=17%, signal=26%	MAP2K1/ADCYAP1R1/PPP2CB/EGR4/F3/ID2/NTRK3/REST/IRS2/MEF2C/PPP2R1B/SOS1/GRIN2B/PIK3CA/TCF12/PTPN11/KIDINS220/FYN/ID4/EP300/FRS2/RPS6KA5/EGR1/IRS1/PCSK5/BDNF/NTF3/GAB1/MEF2A/PTPRS/RPS6KA2/TIAM1/PIK3R1/EGR2/FOS/SH3GL2/NTRK2/PCSK6/EGR3/ASCL1/FOSB
WP_HEPATITIS_B_INFECTION	WP_HEPATITIS_B_INFECTION	150	-0.311717	-1.34811	0.0172414	0.08742	0.0647011	9004	tags=45%, list=25%, signal=34%	TGFB2/IL6/TGFBR1/PIK3R3/CDKN1A/MAPK8/ARAF/STAT1/TBK1/CHUK/SMAD3/STAT6/STAT4/CREB1/BRAF/AKT1/SMAD4/NFATC2/MAPK1/CASP12/YWHAQ/STAT2/CASP10/CREB3L2/DDX58/PIK3CB/KRAS/TGFB3/MAP3K1/PRKCB/IFIH1/MAP2K1/TNF/STAT5B/TRAF6/DDX3X/PRKCA/CREB5/IFNAR1/TIRAP/MYD88/NFKB1/CREBBP/AKT3/MAP2K6/SOS1/TAB2/JAK2/PIK3CA/EP300/DDB2/PTK2B/JAK1/BCL2/NFATC3/SOS2/APAF1/TGFBR2/TICAM2/FAS/PIK3R1/TLR4/TLR3/EGR2/FOS/HSPG2/SLC10A1/…
WP_NRF2_PATHWAY	WP_NRF2_PATHWAY	145	-0.296808	-1.27769	0.0174419	0.0882015	0.0652795	3314	tags=23%, list=9%, signal=21%	GSTA5/SLC6A13/EGR1/SLC6A4/CES5A/SLC39A8/SLC2A14/SLC2A9/UGT2B7/TGFBR2/SLC5A2/SLC2A12/TGFA/SLC6A1/SLC6A2/SLC39A14/CYP4A11/UGT1A1/SLC5A4/NRG1/SLC2A2/SLC5A12/EPHA3/UGT1A4/GSTA2/ADH7/UGT1A3/SLC6A20/CES4A/CYP2A6/GSTM5/GSTM1/SLC5A1
REACTOME_RNA_POLYMERASE_II_TRANSCRIPTION_TERMINATION	REACTOME_RNA_POLYMERASE_II_TRANSCRIPTION_TERMINATION	66	0.46807	1.55783	0.0174731	0.0882015	0.0652795	11019	tags=50%, list=31%, signal=35%	LUZP4/SNRPE/DDX39A/SNRPF/SNRPB/ALYREF/U2AF1L4/LSM10/SARNP/SNRPG/THOC7/THOC6/MAGOHB/PABPN1/CHTOP/RBM8A/MAGOH/THOC5/THOC1/SYMPK/CPSF4/SNRPD3/RNPS1/THOC3/CPSF1/NCBP2/SRSF1/SLBP/SRSF3/SRSF7/UPF3B/SRSF2/CPSF3
REACTOME_PHOSPHORYLATION_OF_THE_APC_C	REACTOME_PHOSPHORYLATION_OF_THE_APC_C	20	0.62349	1.62828	0.0175159	0.0882015	0.0652795	5071	tags=35%, list=14%, signal=30%	UBE2C/UBE2S/PLK1/CDK1/CCNB1/ANAPC11/ANAPC7
WP_GENES_INVOLVED_IN_MALE_INFERTILITY	WP_GENES_INVOLVED_IN_MALE_INFERTILITY	144	-0.302428	-1.30026	0.0175439	0.0882015	0.0652795	5475	tags=37%, list=15%, signal=31%	MTR/ARNTL/ABLIM1/MDM2/USP8/EPSTI1/MOV10L1/NFE2L2/PMS2/UBR2/RGS9/POLG/CREBBP/MMP2/LIG4/AHR/SHMT1/ATM/SOX5/EP300/PON1/CYP1A1/CLOCK/BCL2/TMEM132E/OR2W3/XPC/CCNK/APOB/SLC16A7/TEX15/ABCB1/TSSK4/CTCFL/FAS/CAT/LTF/MTHFD1/NOS2/AR/SEMG1/PACRG/THBS1/FOLH1/RAG1/HORMAD2/SRD5A2/NOS1/BHMT/MAS1L/GNAO1/FOLH1B/ESR1
REACTOME_DECTIN_1_MEDIATED_NONCANONICAL_NF_KB_SIGNALING	REACTOME_DECTIN_1_MEDIATED_NONCANONICAL_NF_KB_SIGNALING	62	0.481593	1.58209	0.0175913	0.088217	0.065291	10262	tags=48%, list=29%, signal=35%	PSMD4/PSMB4/PSMB3/SEM1/UBE2M/RELB/UBA52/NFKB2/PSMB6/PSMB9/RPS27A/PSMB8/PSME2/PSMB1/PSMD13/PSMB7/PSMC4/PSMC5/PSMC3/PSMD14/PSMA4/PSMB2/PSMB5/PSMA7/PSMD8/PSMA3/PSMA5/PSMA1/PSMB11/PSMA2
REACTOME_RHO_GTPASES_ACTIVATE_IQGAPS	REACTOME_RHO_GTPASES_ACTIVATE_IQGAPS	32	0.551756	1.60708	0.0176211	0.088217	0.065291	7583	tags=50%, list=21%, signal=39%	TUBA3E/TUBA3C/TUBB8/TUBAL3/TUBA4B/IQGAP3/TUBA4A/TUBB8B/TUBB4B/TUBA3D/TUBB4A/TUBA1C/ACTB/TUBB2B/TUBA1A/RAC1
REACTOME_TRNA_PROCESSING	REACTOME_TRNA_PROCESSING	108	0.423832	1.50682	0.0176768	0.0882249	0.0652968	9832	tags=43%, list=27%, signal=31%	RPP25/PUS1/LAGE3/CTU1/RPP21/METTL1/TRMU/WDR4/POP7/TRMT1/TSEN15/TRMT112/TP53RK/ZBTB8OS/URM1/TRMT61A/RPP40/RPP30/ADAT3/POP5/TSEN54/CTU2/QTRT1/ADAT2/DUS2/NUP93/FTSJ1/TRMT12/RAN/RPP38/TPRKB/CPSF4/NUP62/POP4/TSEN34/NUP210/RTRAF/RAE1/NUP43/CPSF1/NUP37/NUP188/TRMT10C/TRMT6/GTPBP3/EPRS1
WP_CARDIAC_HYPERTROPHIC_RESPONSE	WP_CARDIAC_HYPERTROPHIC_RESPONSE	55	-0.417804	-1.56641	0.0177936	0.0882249	0.0652968	10914	tags=64%, list=30%, signal=44%	MAP2K3/RAF1/TNFRSF1A/CALM1/HDAC9/MAP2K5/MAPK14/MAP2K4/AKT2/GUCA1A/TGFBR1/MAPK8/CHUK/GSK3B/AKT1/NFATC2/MAPK1/NPPA/PPP3CA/MAP3K1/MAP2K1/TNF/MAP3K14/FGFR2/PRKCA/CAMK2D/PRKD1/NFKB1/MAP2K6/PRKG1/PDPK1/MTOR/MEF2A/FGF2/NRG1
REACTOME_SUMOYLATION_OF_INTRACELLULAR_RECEPTORS	REACTOME_SUMOYLATION_OF_INTRACELLULAR_RECEPTORS	30	-0.510218	-1.67416	0.0178042	0.0882249	0.0652968	3551	tags=30%, list=10%, signal=27%	NR3C1/PPARA/NR3C2/RORA/NR4A2/PGR/AR/NR1I2/ESR1
WP_ONE_CARBON_METABOLISM	WP_ONE_CARBON_METABOLISM	30	-0.50214	-1.64765	0.0178042	0.0882249	0.0652968	7839	tags=47%, list=22%, signal=36%	MTHFS/GART/MTRR/FTCD/MTR/MAT2B/SHMT1/MAT1A/DHFR/AHCYL2/MTHFD1/FOLH1/BHMT/FOLH1B
REACTOME_HSP90_CHAPERONE_CYCLE_FOR_STEROID_HORMONE_RECEPTORS_SHR_	REACTOME_HSP90_CHAPERONE_CYCLE_FOR_STEROID_HORMONE_RECEPTORS_SHR_	57	0.471871	1.52916	0.0178082	0.0882249	0.0652968	6920	tags=35%, list=19%, signal=28%	TUBA3E/TUBA3C/TUBB8/TUBAL3/TUBA4B/CAPZA3/HSPA1A/HSPA1B/TUBA4A/TUBB8B/TUBB4B/DYNLL1/STIP1/TUBA3D/TUBB4A/TUBA1C/TUBB2B/FKBP4/DNAJB1/TUBA1A
PID_ARF6_TRAFFICKING_PATHWAY	PID_ARF6_TRAFFICKING_PATHWAY	49	-0.436811	-1.58463	0.0178571	0.0882833	0.0653401	9628	tags=61%, list=27%, signal=45%	VAMP3/AGTR1/DNM2/CPE/ARF6/SLC2A4/EXOC1/ITGA11/CLTC/ITGAV/ITGA7/ITGA6/ADRB2/AVPR2/CTNNB1/EXOC5/ITGA8/ITGA10/EXOC7/ITGA1/ITGA2/PLD1/SPAG9/EDNRB/CTNND1/ITGB1/ITGA9/CDH1/ASAP2/ITGA4
WP_DOPAMINERGIC_NEUROGENESIS	WP_DOPAMINERGIC_NEUROGENESIS	30	0.557005	1.59004	0.0180451	0.0890275	0.0658909	2969	tags=40%, list=8%, signal=37%	NKX2-2/SLC6A3/EN1/OTX2/CDKN1C/LMX1A/NKX6-1/NEUROD1/PITX3/MSX1/GBX2/SOX2
REACTOME_SIGNALING_BY_TYPE_1_INSULIN_LIKE_GROWTH_FACTOR_1_RECEPTOR_IGF1R_	REACTOME_SIGNALING_BY_TYPE_1_INSULIN_LIKE_GROWTH_FACTOR_1_RECEPTOR_IGF1R_	54	-0.410233	-1.53644	0.0181159	0.0891919	0.0660125	6630	tags=44%, list=19%, signal=36%	PIK3CB/KRAS/PIK3C3/FGFR2/FGF16/IRS2/FLT3/SOS1/PIK3CA/PTPN11/PDPK1/FRS2/IRS1/FGF18/PIK3R4/GAB1/FGF2/PDE3B/FGF20/PIK3R1/FGF7/FGF23/KL/FGF5
KEGG_CITRATE_CYCLE_TCA_CYCLE	KEGG_CITRATE_CYCLE_TCA_CYCLE	31	-0.50605	-1.66976	0.0182927	0.089876	0.0665188	7068	tags=48%, list=20%, signal=39%	OGDH/DLST/SDHA/PC/SDHD/SUCLA2/ACO2/DLD/ACO1/OGDHL/SUCLG2/PCK2/IDH3A/PCK1/SUCLG2P2
REACTOME_ACTIVATION_OF_ATR_IN_RESPONSE_TO_REPLICATION_STRESS	REACTOME_ACTIVATION_OF_ATR_IN_RESPONSE_TO_REPLICATION_STRESS	37	0.538495	1.63074	0.018598	0.0899769	0.0665935	10391	tags=54%, list=29%, signal=38%	ORC6/CDC25A/CDC45/MCM10/CDC6/RFC4/CDC25C/MCM5/MCM7/ORC1/MCM2/CHEK1/MCM4/RFC2/RAD9A/CDC7/MCM6/RPA3/MCM3/DBF4
REACTOME_NEGATIVE_REGULATION_OF_ACTIVITY_OF_TFAP2_AP_2_FAMILY_TRANSCRIPTION_FACTORS	REACTOME_NEGATIVE_REGULATION_OF_ACTIVITY_OF_TFAP2_AP_2_FAMILY_TRANSCRIPTION_FACTORS	10	0.721271	1.60844	0.0186125	0.0899769	0.0665935	1184	tags=30%, list=3%, signal=29%	TFAP2B/TFAP2E/TFAP2C
BIOCARTA_MET_PATHWAY	BIOCARTA_MET_PATHWAY	33	-0.455358	-1.5323	0.0186335	0.0899769	0.0665935	4313	tags=55%, list=12%, signal=48%	MAPK8/PTEN/MAPK1/RAPGEF1/RAP1B/MAP2K1/DOCK1/SOS1/PIK3CA/PTPN11/PTK2B/MET/GAB1/RASA1/ITGB1/PIK3R1/PIK3CG/FOS
REACTOME_NEGATIVE_REGULATION_OF_FGFR1_SIGNALING	REACTOME_NEGATIVE_REGULATION_OF_FGFR1_SIGNALING	33	-0.457869	-1.54075	0.0186335	0.0899769	0.0665935	7730	tags=42%, list=22%, signal=33%	BRAF/MAPK1/FGF1/CBL/SPRY2/PPP2CB/PTPN11/FRS2/ANOS1/FGF2/FGF20/FGF23/KL/FGF5
WP_BDNFTRKB_SIGNALING	WP_BDNFTRKB_SIGNALING	33	-0.455897	-1.53412	0.0186335	0.0899769	0.0665935	9247	tags=61%, list=26%, signal=45%	NRAS/ARC/PLCG1/RPS6KB1/CREB1/BRAF/AKT1/MAPK1/KRAS/EEF2K/MAP2K1/TRPC6/TRPC3/SOS1/MTOR/BDNF/GAB1/PIK3CG/ADCY1/NTRK2
WP_SIGNAL_TRANSDUCTION_THROUGH_IL1R	WP_SIGNAL_TRANSDUCTION_THROUGH_IL1R	33	-0.454424	-1.52916	0.0186335	0.0899769	0.0665935	9004	tags=52%, list=25%, signal=39%	TGFB2/IL6/IRAK2/MAPK8/CHUK/IL1B/IRAK3/TGFB3/MAP3K1/TNF/TRAF6/MAP3K14/MYD88/NFKB1/IL1RAP/MAP2K6/IL1R1
REACTOME_RORA_ACTIVATES_GENE_EXPRESSION	REACTOME_RORA_ACTIVATES_GENE_EXPRESSION	18	-0.578521	-1.68883	0.0186667	0.0899769	0.0665935	7193	tags=78%, list=20%, signal=62%	NCOA6/RXRA/CARM1/NCOA2/MED1/NCOA1/HELZ2/TBL1X/CREBBP/EP300/PPARA/CHD9/RORA/CPT1A
KEGG_ALANINE_ASPARTATE_AND_GLUTAMATE_METABOLISM	KEGG_ALANINE_ASPARTATE_AND_GLUTAMATE_METABOLISM	32	-0.466639	-1.55815	0.0186916	0.0899769	0.0665935	7043	tags=50%, list=20%, signal=40%	GLUD1/ASL/GLUL/AGXT/GPT/ACY3/DDO/GLUD2/GOT2/ALDH5A1/ASS1/CPS1/AGXT2/ABAT/ASPA/GLS2
PID_NETRIN_PATHWAY	PID_NETRIN_PATHWAY	32	-0.493431	-1.64762	0.0186916	0.0899769	0.0665935	7596	tags=50%, list=21%, signal=39%	PITPNA/YES1/MAPK1/MAP1B/NCK1/MAP2K1/TRIO/DOCK1/WASL/PIK3CA/FYN/UNC5C/MYO10/DAPK1/PIK3R1/UNC5A
WP_DEVELOPMENT_AND_HETEROGENEITY_OF_THE_ILC_FAMILY	WP_DEVELOPMENT_AND_HETEROGENEITY_OF_THE_ILC_FAMILY	32	-0.49051	-1.63786	0.0186916	0.0899769	0.0665935	7910	tags=69%, list=22%, signal=54%	GATA3/IL6/IL7/IL1B/IL23A/NFIL3/IL33/IL12B/TNF/ID2/BCL11B/EOMES/AHR/HNF1A/IL17A/ZBTB16/AREG/GFI1/IL13/RORA/IL25/TSLP
REACTOME_DISEASES_OF_CARBOHYDRATE_METABOLISM	REACTOME_DISEASES_OF_CARBOHYDRATE_METABOLISM	34	-0.466513	-1.58795	0.01875	0.0900758	0.0666667	6057	tags=32%, list=17%, signal=27%	HYAL1/GBE1/IDS/KHK/SLC37A4/EPM2A/LCT/G6PC/ALDOB/GYS2/SI
REACTOME_COBALAMIN_CBL_VITAMIN_B12_TRANSPORT_AND_METABOLISM	REACTOME_COBALAMIN_CBL_VITAMIN_B12_TRANSPORT_AND_METABOLISM	21	0.593894	1.56958	0.0188679	0.0904595	0.0669507	2331	tags=24%, list=7%, signal=22%	PRSS1/CTRB2/CTRB1/CTRC/CD320
WP_TCELL_ANTIGEN_RECEPTOR_TCR_PATHWAY_DURING_STAPHYLOCOCCUS_AUREUS_INFECTION	WP_TCELL_ANTIGEN_RECEPTOR_TCR_PATHWAY_DURING_STAPHYLOCOCCUS_AUREUS_INFECTION	62	-0.387143	-1.47865	0.0190114	0.0906613	0.0671	8861	tags=44%, list=25%, signal=33%	ICOS/PLCG1/CHUK/GSK3B/LCP2/AKT1/NFATC2/CBL/PRKCQ/NCK1/MAP2K1/DLG1/TNF/GRAP2/MAP3K14/NFKB1/CD4/SOS1/CHP1/CD28/PIK3CA/FYN/CD40LG/IL10/ITK/PTPRC/FOS
WP_TGFBETA_RECEPTOR_SIGNALLING_IN_SKELETAL_DYSPLASIAS	WP_TGFBETA_RECEPTOR_SIGNALLING_IN_SKELETAL_DYSPLASIAS	59	-0.415504	-1.57024	0.0190114	0.0906613	0.0671	5921	tags=41%, list=17%, signal=34%	TNF/BMP4/LTBP3/CTNNB1/SMAD7/ZFYVE9/ENG/NFKB1/CREBBP/SMAD6/LTBP1/SMAD9/EP300/JAK1/ADAMTSL2/ZNF423/ZEB2/TGFBR2/FBN1/TGFBR3/SMAD1/THBS1/FOS/INHBA
KEGG_ARACHIDONIC_ACID_METABOLISM	KEGG_ARACHIDONIC_ACID_METABOLISM	58	-0.415908	-1.56492	0.019084	0.0906613	0.0671	3898	tags=34%, list=11%, signal=31%	ALOX12/JMJD7-PLA2G4B/PLA2G12A/PLA2G4A/CYP2J2/CYP2U1/CYP2E1/CYP2C18/CYP4F3/ALOX15/CYP4A11/CYP2C9/CYP4F2/EPHX2/CYP4A22/CYP2C19/CYP2C8/PTGS2/CYP2B6/PTGIS
BIOCARTA_MONOCYTE_PATHWAY	BIOCARTA_MONOCYTE_PATHWAY	11	-0.661933	-1.70294	0.0191388	0.0906613	0.0671	1743	tags=45%, list=5%, signal=43%	PECAM1/ITGB1/SELP/ITGA4/SELE
REACTOME_BIOTIN_TRANSPORT_AND_METABOLISM	REACTOME_BIOTIN_TRANSPORT_AND_METABOLISM	11	-0.665565	-1.71229	0.0191388	0.0906613	0.0671	7466	tags=73%, list=21%, signal=58%	PCCB/PC/PCCA/HLCS/BTD/MCCC2/MCCC1/ACACB
REACTOME_THE_CITRIC_ACID_TCA_CYCLE_AND_RESPIRATORY_ELECTRON_TRANSPORT	REACTOME_THE_CITRIC_ACID_TCA_CYCLE_AND_RESPIRATORY_ELECTRON_TRANSPORT	162	0.386864	1.4484	0.0191388	0.0906613	0.0671	10970	tags=51%, list=31%, signal=35%	SLC16A3/PDHA2/UCP1/NDUFA13/COX6C/COX6B1/NDUFB9/NDUFA3/ATP5MC1/BSG/NDUFA7/NDUFB7/NDUFS6/CYC1/ATP5MF/NDUFAF2/NDUFA11/ATP5ME/ATP5F1D/COX4I1/NDUFS5/NDUFA2/NDUFA1/UQCRB/NDUFS8/ATP5F1E/UQCRQ/MPC2/COX5B/UQCRH/ATP5MC2/NDUFB8/NDUFA8/NDUFAF3/IDH3G/UQCR10/NDUFB11/COX20/ETFB/NDUFV2/NDUFB3/NDUFA6/COX6A1/NDUFAF4/COX7B/NDUFAF6/UQCR11/COX8A/ATP5PD/NDUFB4/NDUFB10/ATP5MG/ME1/NDUFB1/COX5A/COX7C/NDUFS2/UCP2/NDUFS7/N…
WP_SPINAL_CORD_INJURY	WP_SPINAL_CORD_INJURY	118	-0.331958	-1.4006	0.0194175	0.0917987	0.0679419	5532	tags=32%, list=15%, signal=27%	RB1/PRKCA/EFNB2/CXCL10/PDYN/MBP/CXCL2/SLIT3/RHOB/MIR23B/ARG1/CCND1/ZFP36/TNFSF13/MAG/COL4A1/EGR1/NGFR/XYLT1/NCAN/SLIT2/BDNF/CCL2/EGFR/NR4A1/VCAN/GADD45A/IL1R1/EPHA4/TLR4/NOS2/AQP1/SELP/FOS/PTGS2/ROS1/NOS1/AQP4
PID_ERBB4_PATHWAY	PID_ERBB4_PATHWAY	38	-0.44909	-1.58078	0.0196078	0.0925148	0.0684718	5810	tags=53%, list=16%, signal=44%	STAT5B/LRIG1/MDM2/ADAM17/PRLR/TAB2/JAK2/GRIN2B/PIK3CA/YAP1/FYN/NRG3/NCOR1/ITCH/NEDD4/EREG/ERBB2/CBFA2T3/PIK3R1/NRG1
REACTOME_CELLULAR_RESPONSE_TO_HYPOXIA	REACTOME_CELLULAR_RESPONSE_TO_HYPOXIA	75	0.447203	1.52364	0.019685	0.0926951	0.0686053	10262	tags=45%, list=29%, signal=32%	EPO/CA9/PSMD4/PSMB4/ELOB/ELOC/PSMB3/SEM1/UBA52/RBX1/PSMB6/EGLN2/PSMB9/RPS27A/PSMB8/EGLN3/PSME2/PSMB1/PSMD13/PSMB7/PSMC4/PSMC5/PSMC3/PSMD14/PSMA4/PSMB2/PSMB5/PSMA7/PSMD8/PSMA3/PSMA5/PSMA1/PSMB11/PSMA2
REACTOME_MET_PROMOTES_CELL_MOTILITY	REACTOME_MET_PROMOTES_CELL_MOTILITY	41	-0.444501	-1.57969	0.019802	0.0930615	0.0688765	7423	tags=49%, list=21%, signal=39%	COL5A3/LAMB2/RAPGEF1/RAP1B/COL1A2/DOCK7/COL1A1/FN1/COL5A1/ITGA2/TNS3/MET/LAMB3/LAMC2/LAMC3/GAB1/COL3A1/ITGB1/LAMA3/LAMA2
WP_NEURAL_CREST_CELL_MIGRATION_IN_CANCER	WP_NEURAL_CREST_CELL_MIGRATION_IN_CANCER	43	-0.435173	-1.56023	0.0198675	0.0931855	0.0689682	5291	tags=35%, list=15%, signal=30%	EPHB1/TRIO/MMP2/AKT3/PIK3CA/KIDINS220/PIK3R4/NGFR/CDH11/BDNF/PAK5/TIAM1/PIK3CG/FOS/NTRK2
PID_ECADHERIN_NASCENT_AJ_PATHWAY	PID_ECADHERIN_NASCENT_AJ_PATHWAY	39	-0.444772	-1.57209	0.02	0.093622	0.0692913	7589	tags=46%, list=21%, signal=36%	AKT1/NCKAP1/RAPGEF1/RAP1B/DLG1/CTNNB1/AFDN/KLHL20/TJP1/PIK3CA/CCND1/IQGAP1/CTNND1/ITGB7/TIAM1/CDH1/PIK3R1/CYFIP2
WP_GPCRS_CLASS_B_SECRETINLIKE	WP_GPCRS_CLASS_B_SECRETINLIKE	24	-0.505987	-1.58873	0.0200573	0.0937058	0.0693534	5915	tags=50%, list=17%, signal=42%	ADCYAP1R1/ADGRL2/GLP1R/ADGRL3/PTH2R/ADGRL4/GLP2R/PTH1R/SCTR/CALCRL/GCGR/VIPR1
REACTOME_SIRT1_NEGATIVELY_REGULATES_RRNA_EXPRESSION	REACTOME_SIRT1_NEGATIVELY_REGULATES_RRNA_EXPRESSION	66	0.456071	1.5179	0.0201613	0.0939383	0.0695254	9447	tags=52%, list=26%, signal=38%	H3C7/H2AC20/H2BC10/H3C11/H3C14/H3C4/H2AC18/H2BC9/H2AX/H2BU1/H2AC14/H2AB1/H4C13/H4C11/H4C2/H2AC4/H4C5/H2AJ/H4C4/H2AC7/H2AC19/H4C14/H4C15/H2AZ1/H4C1/H4C6/H2BC3/TAF1D/H2BC14/H2BC17/SUV39H1/H2BC11/H2AC8/TAF1A
PID_RXR_VDR_PATHWAY	PID_RXR_VDR_PATHWAY	26	-0.516316	-1.64362	0.0202312	0.0939383	0.0695254	9349	tags=58%, list=26%, signal=43%	RXRA/RARG/RPS6KB1/THRA/FAM120B/NR1H4/RARB/MED1/TNF/THRB/NCOA1/ABCA1/BCL2/PPARA/NR4A1
REACTOME_DEGRADATION_OF_GLI1_BY_THE_PROTEASOME	REACTOME_DEGRADATION_OF_GLI1_BY_THE_PROTEASOME	60	0.467986	1.53171	0.0202703	0.0939383	0.0695254	10262	tags=48%, list=29%, signal=35%	PSMD4/PSMB4/PSMB3/SEM1/UBA52/RBX1/PSMB6/PSMB9/RPS27A/PSMB8/PSME2/PSMB1/PSMD13/GLI1/PSMB7/PSMC4/PSMC5/PSMC3/PSMD14/PSMA4/PSMB2/PSMB5/PSMA7/PSMD8/PSMA3/PSMA5/PSMA1/PSMB11/PSMA2
BIOCARTA_RACC_PATHWAY	BIOCARTA_RACC_PATHWAY	15	-0.591353	-1.65099	0.0203046	0.0939383	0.0695254	6090	tags=60%, list=17%, signal=50%	NOS3/GUCY1B1/KCNQ2/TRPC3/GUCY1A1/TRPC4/GUCY1A2/ADCY1/TRPC5
REACTOME_PROTEIN_FOLDING	REACTOME_PROTEIN_FOLDING	100	0.431348	1.5194	0.0203046	0.0939383	0.0695254	6920	tags=32%, list=19%, signal=26%	TUBA3E/TUBA3C/SPHK1/GNG4/TUBAL3/FBXW10/GNG8/TUBA4B/GNGT1/PFDN6/CCT3/ARL2/PFDN4/TUBA4A/NOP56/GNG13/TBCB/TUBB4B/CSNK2B/GNB3/WRAP53/GBA/TUBA3D/GAPDHS/PFDN5/TUBB4A/TUBA1C/ACTB/TUBB2B/RGS7/GNG5/TUBA1A
PID_A6B1_A6B4_INTEGRIN_PATHWAY	PID_A6B1_A6B4_INTEGRIN_PATHWAY	46	-0.42923	-1.55694	0.0204082	0.0942342	0.0697444	3844	tags=46%, list=11%, signal=41%	ITGB4/RPS6KB1/CASP7/AKT1/YWHAQ/LAMB2/ITGA6/PRKCA/PIK3CA/MET/LAMB3/LAMC2/LAMC3/EGFR/ITGB1/ERBB2/CDH1/PIK3R1/LAMA3/MST1R/LAMA2
REACTOME_METABOLISM_OF_STEROID_HORMONES	REACTOME_METABOLISM_OF_STEROID_HORMONES	35	0.529526	1.58093	0.0204678	0.0943266	0.0698128	3760	tags=34%, list=11%, signal=31%	CGA/LHB/STAR/CYP19A1/FDX2/TSPO/CYP21A2/HSD3B1/STARD6/AKR1B15/HSD17B1/AKR1B1
PID_HIF1A_PATHWAY	PID_HIF1A_PATHWAY	19	0.61226	1.58348	0.0205371	0.0944595	0.0699112	6990	tags=47%, list=20%, signal=38%	CDKN2A/NAA10/ELOB/ELOC/RBX1/EGLN2/RACK1/EGLN3/COPS5
PID_MET_PATHWAY	PID_MET_PATHWAY	79	-0.367403	-1.46052	0.0205761	0.0944595	0.0699112	8570	tags=42%, list=24%, signal=32%	PLCG1/MAPK8/ARF6/RANBP10/PTPRJ/AKT1/MAPK1/EPS15/RAPGEF1/CBL/RAP1B/EIF4E/NCK1/MAP3K1/PRKCZ/MAP2K1/CTNNB1/RIN2/SOS1/NUMB/WASL/PIK3CA/PTPN11/PDPK1/MTOR/EGR1/MET/APC/GAB1/ETS1/CDH1/PIK3R1/SH3GL2
REACTOME_SPHINGOLIPID_METABOLISM	REACTOME_SPHINGOLIPID_METABOLISM	89	-0.351636	-1.42489	0.0206612	0.0944851	0.0699301	6253	tags=36%, list=17%, signal=30%	SPHK2/ARSG/SPTLC2/SGPP1/NEU3/PRKD3/ARSK/OSBP/GALC/PRKD1/SGMS1/SPTLC1/PLPP1/ESYT2/ARSJ/ARSD/ENPP7/DEGS2/PPM1L/SPTLC3/CERT1/SPTSSB/ARSH/ASAH2/SGMS2/SGPP2/PLPP3/STS/ACER2/ACER1/SMPD3/FA2H
WP_ALLOGRAFT_REJECTION	WP_ALLOGRAFT_REJECTION	89	-0.348076	-1.41046	0.0206612	0.0944851	0.0699301	4253	tags=26%, list=12%, signal=23%	COL5A1/GABPA/CD28/C4A/C4B/BHMT2/CD40LG/C8B/IL17A/IL10/CXCL13/CXCL11/IL13/C8A/ABCB1/FAS/CXCL12/IL21/C6/CXCR5/LRRK2/FOXP3/C7
REACTOME_NR1H2_AND_NR1H3_MEDIATED_SIGNALING	REACTOME_NR1H2_AND_NR1H3_MEDIATED_SIGNALING	47	-0.423511	-1.54326	0.0207612	0.0946754	0.0700709	7887	tags=51%, list=22%, signal=40%	AGO3/FASN/SCD/KDM3A/MYLIP/CETP/AGO4/KDM1B/TNRC6C/KDM4A/NCOA1/TBL1X/TNRC6A/TNRC6B/EP300/ABCA1/NCOR1/ANGPTL3/ABCG5/PLIN1/NRIP1/ABCG8/PCK1/UGT1A3
REACTOME_HCMV_EARLY_EVENTS	REACTOME_HCMV_EARLY_EVENTS	135	0.400404	1.47355	0.0207824	0.0946754	0.0700709	9321	tags=43%, list=26%, signal=32%	TUBA3E/TUBA3C/TUBB8/H3C7/TUBAL3/H2AC20/H2BC10/H3C11/H3C14/H3C4/H2AC12/TUBA4B/H2AC18/H2AW/H2BC9/TUBA4A/TUBB8B/H2BU1/H2AC14/H2AC21/TUBB4B/H4C13/H4C11/H4C2/DYNLL1/H2AC4/TUBA3D/H4C5/H4C4/TRIM28/GPS2/H2AC7/TUBB4A/H2AC19/TUBA1C/TUBB2B/H4C14/NUP93/H4C15/TUBA1A/H2AC17/EZH2/NUP62/H4C1/NUP210/H4C6/H2BC3/DAXX/RAE1/TUBB2A/NUP43/DYNC1LI1/H2BC14/H2BC17/H2BC11/H2AC8/NUP37/NUP188
KEGG_NEUROTROPHIN_SIGNALING_PATHWAY	KEGG_NEUROTROPHIN_SIGNALING_PATHWAY	126	-0.306031	-1.29939	0.0209424	0.0952219	0.0704754	9740	tags=46%, list=27%, signal=34%	FOXO3/IRAK4/RPS6KA3/NTF4/AKT2/NRAS/PSEN1/IRAK2/PIK3R3/PLCG1/PIK3R5/MAPK8/GSK3B/NTRK1/BRAF/IRAK3/AKT1/MAPK1/YWHAQ/RAPGEF1/RAP1B/PIK3CB/KRAS/MAP3K1/MAP3K3/MAP2K1/TRAF6/NTRK3/CAMK2D/IRS2/CALML3/NFKB1/AKT3/SOS1/SH2B3/PIK3CA/PLCG2/PTPN11/RPS6KA6/PDPK1/KIDINS220/FRS2/RPS6KA5/BCL2/IRS1/SOS2/NGFR/BDNF/CAMK4/NTF3/GAB1/MAP3K5/RPS6KA2/SHC4/PIK3R1/CAMK2B/PIK3CG/NTRK2
REACTOME_MEIOTIC_RECOMBINATION	REACTOME_MEIOTIC_RECOMBINATION	85	0.432278	1.49511	0.0209974	0.0952896	0.0705255	9472	tags=45%, list=26%, signal=33%	PRDM9/H3C7/H2AC20/H2BC10/H3C11/H3C14/H3C4/H2AC18/H2BC9/H2AX/H3-4/H2BU1/MND1/H2AC14/H2AB1/BLM/H4C13/H4C11/H4C2/H2AC4/RAD51/H4C5/H2AJ/H4C4/H2AC7/H2AC19/H4C14/PSMC3IP/H4C15/H2AZ1/H4C1/H4C6/H2BC3/H2BC14/H2BC17/H2BC11/H2AC8/SPO11
BIOCARTA_HCMV_PATHWAY	BIOCARTA_HCMV_PATHWAY	17	-0.572396	-1.62795	0.021164	0.0953183	0.0705467	8069	tags=71%, list=23%, signal=55%	CREB1/AKT1/MAPK1/SP1/MAP3K1/MAP2K1/RB1/NFKB1/MAP2K6/PIK3CA/PIK3R1/PIK3CG
PID_INTEGRIN5_PATHWAY	PID_INTEGRIN5_PATHWAY	17	-0.577507	-1.64249	0.021164	0.0953183	0.0705467	8934	tags=59%, list=25%, signal=44%	TGFBR1/SDC1/ITGAV/ITGB8/FN1/CCN1/ITGB7/FBN1/VCAM1/ITGA4
SA_PTEN_PATHWAY	SA_PTEN_PATHWAY	17	-0.576126	-1.63856	0.021164	0.0953183	0.0705467	7955	tags=65%, list=22%, signal=50%	PTEN/AKT1/MAPK1/AKT3/SOS1/IPCEF1/PIK3CA/PDPK1/ILK/PTK2B/RBL2
WP_PLATELETMEDIATED_INTERACTIONS_WITH_VASCULAR_AND_CIRCULATING_CELLS	WP_PLATELETMEDIATED_INTERACTIONS_WITH_VASCULAR_AND_CIRCULATING_CELLS	17	-0.582148	-1.65569	0.021164	0.0953183	0.0705467	3654	tags=35%, list=10%, signal=32%	CD40LG/CCL2/TLR4/VCAM1/SELP/SELE
REACTOME_FERTILIZATION	REACTOME_FERTILIZATION	26	0.564778	1.56935	0.0213415	0.0957934	0.0708984	4681	tags=38%, list=13%, signal=33%	ZP1/CATSPERD/IZUMO2/ZP3/ADAM2/CATSPER1/ADAM30/SPAM1/CATSPER4/IZUMO1
PID_IL2_1PATHWAY	PID_IL2_1PATHWAY	55	-0.410937	-1.54067	0.0213523	0.0957934	0.0708984	8467	tags=47%, list=24%, signal=36%	MAPK8/STAT1/SOCS3/MAPK1/IKZF3/STAM2/KRAS/PRKCB/MAP2K1/STAT5B/IRS2/SOS1/PIK3CA/PTPN11/FYN/PTK2B/JAK1/BCL2/IRS1/PRKCE/CISH/IL2RB/RASA1/SOCS2/PIK3R1/FOS
REACTOME_FRS_MEDIATED_FGFR3_SIGNALING	REACTOME_FRS_MEDIATED_FGFR3_SIGNALING	20	-0.531065	-1.60502	0.0213904	0.0957934	0.0708984	5076	tags=55%, list=14%, signal=47%	FGF1/KRAS/FGF16/SOS1/PTPN11/FRS2/FGF18/FGF2/FGF20/FGF23/FGF5
REACTOME_RESOLUTION_OF_ABASIC_SITES_AP_SITES_	REACTOME_RESOLUTION_OF_ABASIC_SITES_AP_SITES_	37	0.526156	1.59337	0.0214592	0.0959211	0.0709929	10186	tags=49%, list=28%, signal=35%	RFC4/POLD1/PNKP/SMUG1/NTHL1/POLE4/MUTYH/RFC2/OGG1/POLE2/POLB/PARP1/POLD2/LIG1/XRCC1/FEN1/RPA3/PCNA
REACTOME_AFLATOXIN_ACTIVATION_AND_DETOXIFICATION	REACTOME_AFLATOXIN_ACTIVATION_AND_DETOXIFICATION	19	-0.555466	-1.64858	0.0216802	0.0967271	0.0715895	432	tags=16%, list=1%, signal=16%	CYP3A4/CYP1A2/CYP2A13
WP_PURINERGIC_SIGNALING	WP_PURINERGIC_SIGNALING	32	-0.464488	-1.55097	0.0218069	0.0971099	0.0718728	2947	tags=44%, list=8%, signal=40%	GNAT3/P2RY1/P2RX1/PANX1/LPAR4/P2RY14/P2RY13/P2RY12/P2RY10/GNAT1/P2RX3/GNAO1/P2RY4/P2RX2
REACTOME_KERATAN_SULFATE_KERATIN_METABOLISM	REACTOME_KERATAN_SULFATE_KERATIN_METABOLISM	34	-0.461654	-1.57141	0.021875	0.0972313	0.0719626	5327	tags=29%, list=15%, signal=25%	B4GALT5/ST3GAL6/PRELP/B3GNT2/ST3GAL1/B3GNT7/LUM/OMD/OGN/CHST5
REACTOME_CHONDROITIN_SULFATE_DERMATAN_SULFATE_METABOLISM	REACTOME_CHONDROITIN_SULFATE_DERMATAN_SULFATE_METABOLISM	50	-0.429453	-1.56029	0.0220588	0.0976348	0.0722613	6057	tags=38%, list=17%, signal=32%	HYAL1/CHSY1/CSGALNACT2/GPC4/IDS/GPC5/DSE/CHSY3/B3GAT2/XYLT1/NCAN/VCAN/UST/CHST9/CSGALNACT1/HSPG2/DCN/DSEL/B3GAT1
WP_IRON_METABOLISM_IN_PLACENTA	WP_IRON_METABOLISM_IN_PLACENTA	12	-0.634973	-1.68242	0.0220588	0.0976348	0.0722613	4323	tags=50%, list=12%, signal=44%	TFR2/TF/ACO1/SLC40A1/IREB2/STEAP3
PID_PDGFRB_PATHWAY	PID_PDGFRB_PATHWAY	129	-0.313236	-1.33713	0.0220994	0.0976348	0.0722613	9704	tags=47%, list=27%, signal=35%	MAP2K4/ABI1/TAGLN/RPS6KA3/VAV2/DNM2/STAT3/NRAS/PIK3R3/PLCG1/PIK3R5/MAPK8/STAT1/SLA/PTEN/PTPRJ/BRAF/GRB10/YES1/NCKAP1/MAPK1/YWHAQ/ITGAV/USP6NL/RAPGEF1/CBL/RAP1B/ACTR2/ARHGAP35/PIK3CB/KRAS/LRP1/NCK1/MAP2K1/STAT5B/EIF2AK2/AFDN/PDGFRB/PRKCA/SOS1/DOCK4/WASL/JAK2/PIK3CA/PTPN11/FYN/IQGAP1/PRKCE/PPP2R2B/PLA2G4A/MYOCD/S1PR1/EPS8/GAB1/RASA1/PIK3R1/CYFIP2/ITGB3/PIK3CG/FOS/BLK
KEGG_PATHOGENIC_ESCHERICHIA_COLI_INFECTION	KEGG_PATHOGENIC_ESCHERICHIA_COLI_INFECTION	56	0.464356	1.49957	0.02213	0.0976348	0.0722613	7126	tags=39%, list=20%, signal=32%	TUBA3E/TUBA3C/LY96/TUBB8/TUBB7P/TUBAL3/TUBA4A/ARPC4/TUBB4B/ARPC1B/ARPC5L/ARHGEF2/ARPC5/TUBA3D/ARPC3/TUBB4A/TUBA1C/ACTB/TUBB2B/YWHAZ/TUBA1A/KRT18
KEGG_INSULIN_SIGNALING_PATHWAY	KEGG_INSULIN_SIGNALING_PATHWAY	137	-0.307692	-1.31738	0.0224719	0.0989596	0.0732418	8488	tags=42%, list=24%, signal=32%	PIK3R5/MAPK8/ARAF/CBLB/GSK3B/RPS6KB1/PRKAR2A/SOCS3/SLC2A4/PRKACB/BRAF/AKT1/FASN/MAPK1/RAPGEF1/CBL/INSR/EIF4E/PRKAR1A/PIK3CB/KRAS/PHKB/PRKCZ/MAP2K1/PRKAA1/IRS2/CALML3/PDE3A/PTPRF/AKT3/EXOC7/SOS1/PIK3CA/PDPK1/PPARGC1A/MTOR/IRS1/SOS2/PCK2/PYGL/LIPE/ACACB/FOXO1/PPP1R3B/PHKA1/PDE3B/SORBS1/FBP2/G6PC/SHC4/SOCS2/PIK3R1/PRKAG2/PCK1/FBP1/PIK3CG/GYS2
REACTOME_FANCONI_ANEMIA_PATHWAY	REACTOME_FANCONI_ANEMIA_PATHWAY	39	0.507569	1.54925	0.022792	0.100036	0.0740388	7104	tags=41%, list=20%, signal=33%	SLX1A/UBE2T/EME1/SLX1B/UBA52/FANCD2/FAAP24/CENPX/RPS27A/ERCC1/FANCB/FANCE/CENPS/FAAP20/FANCG/FANCI
REACTOME_ANCHORING_FIBRIL_FORMATION	REACTOME_ANCHORING_FIBRIL_FORMATION	15	-0.583525	-1.62914	0.0228426	0.100036	0.0740388	4857	tags=73%, list=14%, signal=63%	COL1A2/COL4A2/COL4A6/COL1A1/COL4A1/LAMB3/LAMC2/TLL1/COL4A3/LAMA3/COL4A4
REACTOME_CGMP_EFFECTS	REACTOME_CGMP_EFFECTS	15	-0.589571	-1.64601	0.0228426	0.100036	0.0740388	3798	tags=53%, list=11%, signal=48%	PDE1A/PRKG1/PDE5A/KCNMA1/ITPR1/PDE2A/PDE10A/PDE11A
WP_NONALCOHOLIC_FATTY_LIVER_DISEASE	WP_NONALCOHOLIC_FATTY_LIVER_DISEASE	149	0.391703	1.45725	0.0230863	0.100473	0.074362	8369	tags=43%, list=23%, signal=33%	INS/COX8C/LEP/PIK3R2/NDUFA4L2/COX7B2/COX7A1/NDUFA13/COX6C/DDIT3/COX6B1/NDUFB9/NDUFA3/NDUFA7/NDUFB7/NDUFS6/CYC1/NDUFA11/TRAF2/COX4I1/NDUFS5/NDUFA2/NDUFA1/UQCRB/ATF4/COX4I2/NDUFS8/UQCRQ/BAX/COX5B/UQCRH/IL1A/NDUFB8/NDUFA8/UQCR10/NDUFB11/CXCL8/NDUFV2/NDUFB3/NDUFA6/COX6A1/COX7B/BAK1/UQCR11/CEBPA/COX8A/PRKAG3/UQCRHL/NDUFB4/NDUFB10/NDUFB1/COX7A2/COX5A/COX7C/BBC3/NDUFS2/RAC1/GSK3A/NDUFS7/NDUFC1/NDUFA12/A…
REACTOME_MITOCHONDRIAL_FATTY_ACID_BETA_OXIDATION	REACTOME_MITOCHONDRIAL_FATTY_ACID_BETA_OXIDATION	37	-0.436446	-1.5084	0.0231023	0.100473	0.074362	9512	tags=57%, list=27%, signal=42%	ACOT11/ACSF2/HADH/MMAA/ACBD7/HADHA/MCEE/PCCB/ACOT1/PCTP/ACADS/PCCA/HADHB/ACOT2/ACADL/MMUT/ACAA2/ACADM/ACOT12/ACSM3/ACAD11
WP_GLUCURONIDATION	WP_GLUCURONIDATION	26	-0.509955	-1.62337	0.0231214	0.100473	0.074362	3391	tags=42%, list=9%, signal=38%	UGP2/PGM2/PGM1/UGT2B15/UGT2B7/UGT1A1/UGT2B10/UGT2A3/UGT1A4/UGT1A3/UGT2B17
WP_PPAR_ALPHA_PATHWAY	WP_PPAR_ALPHA_PATHWAY	26	-0.50275	-1.60044	0.0231214	0.100473	0.074362	4520	tags=46%, list=13%, signal=40%	APOA5/CCND1/CYP7A1/PPARA/ACAA1/CPT2/CPT1A/SCP2/CYP4A11/ACADM/CYP8B1/EHHADH
WP_VITAMIN_A_AND_CAROTENOID_METABOLISM	WP_VITAMIN_A_AND_CAROTENOID_METABOLISM	43	-0.431514	-1.54711	0.0231788	0.100473	0.074362	6269	tags=51%, list=18%, signal=42%	MAPK1/ALDH1A2/RARB/RBP4/NPC1L1/CD36/LPL/RDH12/RPE65/LRAT/RETSAT/ABCG5/CYP2E1/BCO1/CRABP1/ABCG8/ADH1A/ALDH1A3/RDH5/ADH4/BCO2/CYP26A1
REACTOME_FGFRL1_MODULATION_OF_FGFR1_SIGNALING	REACTOME_FGFRL1_MODULATION_OF_FGFR1_SIGNALING	13	-0.626324	-1.6873	0.0231959	0.100473	0.074362	8867	tags=62%, list=25%, signal=46%	FGF10/SPRED1/FGFRL1/SPRED2/FGF18/FGF2/FGF23/FGF5
BIOCARTA_HER2_PATHWAY	BIOCARTA_HER2_PATHWAY	23	-0.49646	-1.54286	0.0232558	0.10055	0.0744186	4187	tags=48%, list=12%, signal=42%	GRIP1/MAP2K1/SOS1/PIK3CA/EP300/IL6ST/EGFR/ERBB2/PIK3R1/PIK3CG/ESR1
WP_OSTEOBLAST_SIGNALING	WP_OSTEOBLAST_SIGNALING	14	-0.605399	-1.63405	0.0234375	0.101151	0.0748639	5386	tags=57%, list=15%, signal=49%	PDGFRB/IBSP/COL1A1/PTH1R/SLC17A2/ITGB3/FGF23/TNFSF11
WP_PDGFRBETA_PATHWAY	WP_PDGFRBETA_PATHWAY	29	-0.50545	-1.65368	0.0235294	0.101181	0.0748857	8570	tags=72%, list=24%, signal=55%	ELK1/MAP2K4/STAT3/PLCG1/MAPK8/STAT1/STAT6/MAP3K1/PRKCB/MAP2K1/STAT5B/EIF2AK2/PDGFRB/PRKCA/SOS1/JAK2/PIK3CA/JAK1/RASA1/PIK3R1/FOS
WP_TCELL_RECEPTOR_AND_COSTIMULATORY_SIGNALING	WP_TCELL_RECEPTOR_AND_COSTIMULATORY_SIGNALING	29	-0.49773	-1.62842	0.0235294	0.101181	0.0748857	8570	tags=52%, list=24%, signal=39%	PLCG1/GSK3B/PTEN/AKT1/NFATC2/PPP3CA/DYRK1A/PRKCA/NFKB1/CD28/FYN/CSNK1A1/RASGRP1/RASA1/ITK
PID_IFNG_PATHWAY	PID_IFNG_PATHWAY	40	-0.440006	-1.55325	0.0236486	0.101327	0.0749939	8411	tags=60%, list=23%, signal=46%	STAT3/IRF9/STAT1/IL1B/AKT1/MAPK1/RAPGEF1/CBL/RAP1B/PIAS1/MAP3K1/MAP2K1/CAMK2D/SMAD7/CREBBP/JAK2/PIK3CA/PTPN11/EP300/MTOR/JAK1/DAPK1/PIK3R1/CAMK2B
WP_FERROPTOSIS	WP_FERROPTOSIS	40	-0.43725	-1.54352	0.0236486	0.101327	0.0749939	3982	tags=30%, list=11%, signal=27%	TF/SLC40A1/NCOA4/ACSL5/STEAP3/SLC39A8/ACSL6/CP/LPCAT3/ACSL1/ALOX15/SLC39A14
WP_PATHWAYS_REGULATING_HIPPO_SIGNALING	WP_PATHWAYS_REGULATING_HIPPO_SIGNALING	98	-0.356608	-1.45033	0.0236967	0.10135	0.0750111	7113	tags=43%, list=20%, signal=34%	LATS1/EPHA2/INSR/PRKCQ/PRKAR1A/PRKCZ/PRKCB/PLCB4/PRKAA1/GNAQ/CTNNB1/CDH20/FGFR2/PDGFRB/PRKCA/CDH6/PRKD3/FLT4/FLT3/CDH2/CDH12/MTOR/FLT1/CDH16/PRKCE/CDH13/MET/LATS2/NGFR/PRKCH/CDH11/CDH5/TEAD1/EGFR/CDH19/CDH1/KIT/CDH17/PRKAG2/KDR/NTRK2/TEK
KEGG_RENIN_ANGIOTENSIN_SYSTEM	KEGG_RENIN_ANGIOTENSIN_SYSTEM	17	-0.566731	-1.61184	0.0238095	0.10165	0.075233	6085	tags=53%, list=17%, signal=44%	ACE2/LNPEP/ANPEP/MME/CTSG/CPA3/AGTR2/ENPEP/CMA1
REACTOME_CDC6_ASSOCIATION_WITH_THE_ORC_ORIGIN_COMPLEX	REACTOME_CDC6_ASSOCIATION_WITH_THE_ORC_ORIGIN_COMPLEX	11	0.701371	1.59654	0.0239726	0.102163	0.0756125	6394	tags=45%, list=18%, signal=37%	ORC6/E2F2/CDC6/E2F1/ORC1
REACTOME_TRNA_MODIFICATION_IN_THE_NUCLEUS_AND_CYTOSOL	REACTOME_TRNA_MODIFICATION_IN_THE_NUCLEUS_AND_CYTOSOL	43	0.489623	1.52337	0.0242857	0.103312	0.0764631	7709	tags=42%, list=22%, signal=33%	PUS1/LAGE3/CTU1/METTL1/WDR4/TRMT1/TRMT112/TP53RK/URM1/TRMT61A/ADAT3/CTU2/QTRT1/ADAT2/DUS2/FTSJ1/TRMT12/TPRKB
REACTOME_CYTOSOLIC_TRNA_AMINOACYLATION	REACTOME_CYTOSOLIC_TRNA_AMINOACYLATION	24	0.581883	1.58928	0.0245023	0.104047	0.0770072	13817	tags=83%, list=39%, signal=51%	EEF1E1/GARS1/FARSB/YARS1/AARS1/FARSA/KARS1/VARS1/HARS1/QARS1/MARS1/EPRS1/TARS1/PPA1/CARS1/AIMP1/RARS1/SARS1/WARS1/LARS1
REACTOME_SHC_MEDIATED_CASCADE_FGFR1	REACTOME_SHC_MEDIATED_CASCADE_FGFR1	21	-0.518939	-1.59308	0.0245902	0.104234	0.0771456	1996	tags=29%, list=6%, signal=27%	SOS1/FGF2/FGF20/FGF23/KL/FGF5
WP_TYPE_II_DIABETES_MELLITUS	WP_TYPE_II_DIABETES_MELLITUS	22	-0.492565	-1.53278	0.0248619	0.105198	0.0778593	8488	tags=59%, list=24%, signal=45%	PIK3R5/MAPK8/SLC2A4/GK/MAPK1/INSR/PRKCZ/TNF/MTOR/IRS1/SLC2A2/ADIPOQ/INS-IGF2
REACTOME_RECYCLING_PATHWAY_OF_L1	REACTOME_RECYCLING_PATHWAY_OF_L1	49	0.478048	1.51986	0.0249307	0.105303	0.0779363	7136	tags=39%, list=20%, signal=31%	TUBA3E/TUBA3C/TUBB8/TUBAL3/TUBA4B/TUBA4A/TUBB8B/CLTA/TUBB4B/DNM1/AP2S1/TUBA3D/TUBB4A/TUBA1C/KIF4A/ACTB/TUBB2B/TUBA1A/SRC
KEGG_CYSTEINE_AND_METHIONINE_METABOLISM	KEGG_CYSTEINE_AND_METHIONINE_METABOLISM	34	-0.455836	-1.55161	0.025	0.105408	0.0780142	7968	tags=47%, list=22%, signal=37%	LDHC/SDS/AHCYL1/MAT2A/MTR/MAT2B/CTH/MAT1A/GOT2/CBS/AHCYL2/CDO1/LDHAL6B/DNMT3L/TAT/BHMT
WP_PHOSPHODIESTERASES_IN_NEURONAL_FUNCTION	WP_PHOSPHODIESTERASES_IN_NEURONAL_FUNCTION	53	-0.411027	-1.51828	0.0257353	0.108191	0.0800743	4877	tags=42%, list=14%, signal=36%	GUCY1B1/PDE4B/PDE3A/GUCY1A1/ADCY7/GRIN2B/PDE8A/ADCY9/CHRFAM7A/PDE5A/CHRNA7/PDE3B/GUCY1A2/PDE7B/PDE2A/PDE10A/ADCY1/PDE1C/GRIN2A/DRD1/PDE11A/NOS1
REACTOME_ERYTHROCYTES_TAKE_UP_CARBON_DIOXIDE_AND_RELEASE_OXYGEN	REACTOME_ERYTHROCYTES_TAKE_UP_CARBON_DIOXIDE_AND_RELEASE_OXYGEN	13	-0.618378	-1.66589	0.0257732	0.108191	0.0800743	1100	tags=46%, list=3%, signal=45%	CA1/AQP1/CA2/CA4/RHAG/SLC4A1
REACTOME_DIGESTION_AND_ABSORPTION	REACTOME_DIGESTION_AND_ABSORPTION	27	0.552513	1.54932	0.0257967	0.108191	0.0800743	3089	tags=37%, list=9%, signal=34%	CLPS/PNLIP/GUCA2A/CHIA/PNLIPRP3/ALPI/AMY2A/CEL/MGAM/PIR
REACTOME_DNA_METHYLATION	REACTOME_DNA_METHYLATION	63	0.455517	1.49679	0.0259563	0.108669	0.0804279	9191	tags=52%, list=26%, signal=39%	H3C7/H2AC20/H2BC10/H3C11/H3C14/H3C4/H2AC18/H2BC9/H2AX/H2BU1/H2AC14/H2AB1/H4C13/H4C11/H4C2/H2AC4/DNMT3B/H4C5/H2AJ/H4C4/H2AC7/H2AC19/H4C14/H4C15/H2AZ1/H4C1/UHRF1/H4C6/H2BC3/H2BC14/H2BC17/H2BC11/H2AC8
BIOCARTA_GLEEVEC_PATHWAY	BIOCARTA_GLEEVEC_PATHWAY	23	-0.490783	-1.52521	0.0261628	0.109341	0.0809253	8467	tags=52%, list=24%, signal=40%	MAPK8/STAT1/AKT1/MAP3K1/MAP2K1/STAT5B/SOS1/JAK2/PIK3CA/PIK3R1/PIK3CG/FOS
REACTOME_RNA_POLYMERASE_I_TRANSCRIPTION_TERMINATION	REACTOME_RNA_POLYMERASE_I_TRANSCRIPTION_TERMINATION	31	0.531093	1.53841	0.0267062	0.111417	0.0824613	11033	tags=48%, list=31%, signal=34%	CD3EAP/ZNRD1/POLR2H/POLR2K/POLR2L/POLR1C/GTF2H5/POLR2F/ERCC2/TAF1D/CDK7/TAF1A/POLR1D/POLR2E/POLR1E
WP_15Q112_COPY_NUMBER_VARIATION_SYNDROME	WP_15Q112_COPY_NUMBER_VARIATION_SYNDROME	12	-0.629727	-1.66852	0.0269608	0.112282	0.0831015	7242	tags=75%, list=20%, signal=60%	GOLGA6L1/TUBGCP3/GOLGA8DP/TUBGCP5/FMR1/CYFIP1/NIPA2/TUBGCP4/NIPA1
BIOCARTA_CXCR4_PATHWAY	BIOCARTA_CXCR4_PATHWAY	19	-0.545231	-1.61821	0.0271003	0.112665	0.0833854	6187	tags=63%, list=17%, signal=52%	PLCG1/MAPK1/PRKCB/MAP2K1/GNAQ/PRKCA/NFKB1/PIK3CA/PTK2B/PIK3C2G/PIK3R1/CXCL12
BIOCARTA_KERATINOCYTE_PATHWAY	BIOCARTA_KERATINOCYTE_PATHWAY	46	-0.416336	-1.51017	0.0272109	0.112928	0.0835797	7477	tags=46%, list=21%, signal=36%	MAPK1/SP1/ETS2/PRKCQ/MAP3K1/PRKCB/MAP2K1/TNF/MAP3K14/PRKCA/NFKB1/MAP2K6/BCL2/PRKCE/PRKCH/HOXA7/EGFR/ETS1/MAP3K5/FAS/FOS
BIOCARTA_INSULIN_PATHWAY	BIOCARTA_INSULIN_PATHWAY	21	-0.51276	-1.57411	0.0273224	0.113193	0.083776	4187	tags=57%, list=12%, signal=50%	MAPK8/SLC2A4/INSR/MAP2K1/SOS1/PIK3CA/PTPN11/IRS1/RASA1/PIK3R1/PIK3CG/FOS
REACTOME_CYCLIN_A_B1_B2_ASSOCIATED_EVENTS_DURING_G2_M_TRANSITION	REACTOME_CYCLIN_A_B1_B2_ASSOCIATED_EVENTS_DURING_G2_M_TRANSITION	25	0.560385	1.5431	0.0273973	0.113281	0.0838415	9192	tags=60%, list=26%, signal=45%	CDC25A/PLK1/PKMYT1/CDK1/CCNB1/CCNB2/CDC25C/PPP2R1A/CCNA1/LCMT1/PPP2R3B/CDC25B/CDK7/FOXM1/CCNA2
BIOCARTA_IL1R_PATHWAY	BIOCARTA_IL1R_PATHWAY	31	-0.46811	-1.54458	0.027439	0.113281	0.0838415	9004	tags=55%, list=25%, signal=41%	TGFB2/IL6/IRAK2/MAPK8/CHUK/IL1B/IRAK3/TGFB3/MAP3K1/TNF/TRAF6/MAP3K14/MYD88/NFKB1/IL1RAP/MAP2K6/IL1R1
REACTOME_POLO_LIKE_KINASE_MEDIATED_EVENTS	REACTOME_POLO_LIKE_KINASE_MEDIATED_EVENTS	16	0.627444	1.56268	0.0276873	0.114108	0.0844535	5189	tags=56%, list=14%, signal=48%	MYBL2/CDC25A/PLK1/PKMYT1/CCNB1/CENPF/CCNB2/LIN37/CDC25C
REACTOME_COPI_MEDIATED_ANTEROGRADE_TRANSPORT	REACTOME_COPI_MEDIATED_ANTEROGRADE_TRANSPORT	102	0.420988	1.48837	0.0278481	0.114572	0.084797	6920	tags=25%, list=19%, signal=20%	TUBA3E/TUBA3C/INS/SPTA1/FOLR1/TUBB8/TUBAL3/TUBA4B/CAPZA3/TUBA4A/TUBB8B/TMED3/TUBB4B/COPE/DYNLL1/TUBA3D/TMED9/ARF1/TUBB4A/ARFGAP1/TUBA1C/TUBB2B/COPZ1/YKT6/TUBA1A
REACTOME_ERBB2_ACTIVATES_PTK6_SIGNALING	REACTOME_ERBB2_ACTIVATES_PTK6_SIGNALING	13	-0.602434	-1.62294	0.0283505	0.116438	0.0861777	3260	tags=38%, list=9%, signal=35%	NRG3/EREG/EGFR/ERBB2/NRG1
REACTOME_SYNTHESIS_SECRETION_AND_INACTIVATION_OF_GLUCAGON_LIKE_PEPTIDE_1_GLP_1_	REACTOME_SYNTHESIS_SECRETION_AND_INACTIVATION_OF_GLUCAGON_LIKE_PEPTIDE_1_GLP_1_	20	0.590121	1.54113	0.0286624	0.117516	0.0869756	5514	tags=45%, list=15%, signal=38%	GCG/CDX2/LEP/FFAR1/GNG13/PAX6/GNB3/PCSK1/GPR119
WP_PANCREATIC_ADENOCARCINOMA_PATHWAY	WP_PANCREATIC_ADENOCARCINOMA_PATHWAY	89	-0.34693	-1.40582	0.0289256	0.118391	0.0876232	9004	tags=47%, list=25%, signal=35%	TGFB2/TGFBR1/PIK3R3/CDKN1A/MAPK8/ARAF/STAT1/CHUK/SMAD3/RALB/RPS6KB1/RALBP1/BRAF/AKT1/SMAD4/MAPK1/PIK3CB/KRAS/TGFB3/MAP2K1/RB1/GADD45B/NFKB1/CDK6/AKT3/PLD1/PIK3CA/CCND1/ARHGEF6/MTOR/POLK/DDB2/JAK1/RIPK4/PAK5/EGFR/GADD45A/TGFBR2/TIAM1/TGFA/ERBB2/PIK3R1
REACTOME_HOST_INTERACTIONS_OF_HIV_FACTORS	REACTOME_HOST_INTERACTIONS_OF_HIV_FACTORS	131	0.390239	1.43208	0.029304	0.119354	0.0883357	10424	tags=41%, list=29%, signal=29%	AP1M2/PSMD4/PSMB4/ELOB/HMGA1/ELOC/PSMB3/SEM1/AP2S1/UBA52/BANF1/RBX1/HLA-A/CD8B/PSMB6/ARF1/PSMB9/PPIA/RPS27A/RANGAP1/PSMB8/PSME2/PSMB1/RANBP1/PSMD13/PSMB7/PSMC4/NUP93/PSMC5/PSMC3/PSMD14/SLC25A6/RAC1/RAN/NUP62/NPM1/NUP210/PSMA4/PSMB2/RAE1/NUP43/PSMB5/PSMA7/NUP37/NUP188/PSMD8/PSMA3/AP2M1/PSMA5/PSMA1/SEC13/PSMB11/PSMA2/ATP6V1H
REACTOME_ACTIVATION_OF_SMO	REACTOME_ACTIVATION_OF_SMO	18	-0.557925	-1.62871	0.0293333	0.119354	0.0883357	8388	tags=61%, list=23%, signal=47%	KIF3A/SMO/SHH/DHH/ARRB1/CDON/BOC/PTCH1/CSNK1A1/EVC/GAS1
BIOCARTA_NKCELLS_PATHWAY	BIOCARTA_NKCELLS_PATHWAY	20	-0.521201	-1.57521	0.0294118	0.119354	0.0883357	3844	tags=35%, list=11%, signal=31%	PIK3CA/PTK2B/KLRD1/ITGB1/KLRC3/PIK3R1/KLRC4
REACTOME_CARGO_RECOGNITION_FOR_CLATHRIN_MEDIATED_ENDOCYTOSIS	REACTOME_CARGO_RECOGNITION_FOR_CLATHRIN_MEDIATED_ENDOCYTOSIS	105	-0.33053	-1.36723	0.0294118	0.119354	0.0883357	7368	tags=34%, list=21%, signal=27%	EPS15/STAM2/CBL/ITSN1/NECAP1/GRK3/UBQLN2/ITSN2/SYT11/SYT1/ADRB2/AVPR2/ARRB1/SCARB2/CD3G/CD4/TGOLN2/TF/FCHO2/REPS2/M6PR/SGIP1/AREG/FZD4/LDLR/EREG/APOB/EGFR/TGFA/IL7R/STON1/SYT2/SH3GL2/CHRM2/SYT9/CFTR
REACTOME_TRANSCRIPTIONAL_REGULATION_OF_WHITE_ADIPOCYTE_DIFFERENTIATION	REACTOME_TRANSCRIPTIONAL_REGULATION_OF_WHITE_ADIPOCYTE_DIFFERENTIATION	84	-0.357296	-1.42984	0.0294118	0.119354	0.0883357	7622	tags=37%, list=21%, signal=29%	ZNF467/FAM120B/THRAP3/NCOA2/ANGPTL4/MED1/TNF/CD36/LPL/KLF5/NCOA1/HELZ2/MED23/TBL1X/NFKB1/CREBBP/MED14/KLF4/PPARGC1A/EP300/MED13L/NR2F2/NCOR1/PPARA/MED13/CHD9/PLIN1/PCK1/EGR2/FABP4/ADIPOQ
REACTOME_FORMATION_OF_THE_CORNIFIED_ENVELOPE	REACTOME_FORMATION_OF_THE_CORNIFIED_ENVELOPE	127	0.389624	1.42281	0.0295931	0.119885	0.0887289	5013	tags=28%, list=14%, signal=24%	SPRR2D/CASP14/KRT25/KRT78/KRT28/KLK8/KRT5/KRT4/KRT75/KRT13/LCE1F/KRT9/SPRR3/KRT3/KRT79/KRT34/KRT38/KRT23/KRT17/KRT14/KLK14/KRT6A/KRT15/PKP3/KRT36/KLK12/KLK5/SPRR1B/KRT10/KRT6C/RPTN/CELA2A/KRT74/DSG3/SPRR2F
PID_INTEGRIN3_PATHWAY	PID_INTEGRIN3_PATHWAY	43	-0.425118	-1.52418	0.0298013	0.120355	0.0890766	5460	tags=42%, list=15%, signal=36%	PECAM1/COL1A2/TGFBI/PDGFRB/IBSP/COL4A6/COL1A1/FN1/TNC/COL4A1/CCN1/TGFBR2/FBN1/COL4A3/COL4A4/KDR/ITGB3/THBS1
BIOCARTA_COMP_PATHWAY	BIOCARTA_COMP_PATHWAY	19	-0.544249	-1.61529	0.0298103	0.120355	0.0890766	6658	tags=58%, list=19%, signal=47%	C3/C5/C1R/C4A/C4B/MBL2/C1S/C8A/MASP1/C6/C7
REACTOME_INHIBITION_OF_THE_PROTEOLYTIC_ACTIVITY_OF_APC_C_REQUIRED_FOR_THE_ONSET_OF_ANAPHASE_BY_MITOTIC_SPINDLE_CHECKPOINT_COMPONENTS	REACTOME_INHIBITION_OF_THE_PROTEOLYTIC_ACTIVITY_OF_APC_C_REQUIRED_FOR_THE_ONSET_OF_ANAPHASE_BY_MITOTIC_SPINDLE_CHECKPOINT_COMPONENTS	21	0.577784	1.527	0.0298742	0.120408	0.0891163	8774	tags=43%, list=25%, signal=32%	UBE2C/UBE2S/CDC20/ANAPC11/BUB1B/ANAPC7/MAD2L1/CDC16/UBE2E1
PID_RET_PATHWAY	PID_RET_PATHWAY	39	-0.435651	-1.53985	0.03	0.120711	0.0893401	8467	tags=51%, list=24%, signal=39%	MAPK8/CREB1/GRB10/MAPK1/GFRA1/NCK1/DOK4/DOK5/PRKCA/IRS2/SHANK3/SOS1/PIK3CA/PTPN11/FRS2/IRS1/GAB1/RET/RASA1/PIK3R1
KEGG_GLYCOSAMINOGLYCAN_BIOSYNTHESIS_CHONDROITIN_SULFATE	KEGG_GLYCOSAMINOGLYCAN_BIOSYNTHESIS_CHONDROITIN_SULFATE	22	-0.490674	-1.52689	0.0303867	0.121854	0.0901866	3044	tags=41%, list=9%, signal=37%	CHSY1/CSGALNACT2/DSE/CHSY3/B3GAT2/XYLT1/UST/CSGALNACT1/B3GAT1
REACTOME_CITRIC_ACID_CYCLE_TCA_CYCLE_	REACTOME_CITRIC_ACID_CYCLE_TCA_CYCLE_	22	-0.491137	-1.52834	0.0303867	0.121854	0.0901866	7068	tags=45%, list=20%, signal=37%	OGDH/DLST/SDHA/SDHD/SUCLA2/ACO2/DLD/SUCLG2/IDH3A/NNT
REACTOME_EICOSANOID_LIGAND_BINDING_RECEPTORS	REACTOME_EICOSANOID_LIGAND_BINDING_RECEPTORS	15	-0.573474	-1.60107	0.0304569	0.12193	0.0902425	8758	tags=67%, list=24%, signal=50%	LTB4R/PTGER2/PTGIR/OXER1/CYSLTR2/PTGFR/CYSLTR1/PTGDR/LTB4R2/GPR17
KEGG_CIRCADIAN_RHYTHM_MAMMAL	KEGG_CIRCADIAN_RHYTHM_MAMMAL	13	-0.594357	-1.60118	0.0309278	0.123607	0.091484	8489	tags=69%, list=24%, signal=53%	PER1/BHLHE40/CRY1/CRY2/ARNTL/BHLHE41/PER2/CLOCK/PER3
REACTOME_INTRACELLULAR_SIGNALING_BY_SECOND_MESSENGERS	REACTOME_INTRACELLULAR_SIGNALING_BY_SECOND_MESSENGERS	304	-0.250382	-1.20981	0.03125	0.124477	0.0921273	8887	tags=37%, list=25%, signal=28%	RRAGB/PSMA6/FGF10/ICOS/LAMTOR3/PIK3R3/CAMKK2/CDKN1A/AGO1/ADCY5/PLCG1/CHUK/GSK3B/PRKAR2A/PHC1/CREB1/USP13/PTEN/PRKACB/AGO3/XIAP/AKT1/ADCY4/MAPK1/FGF1/PPP2R5E/ADCY6/FOXO4/AHCYL1/INSR/ITPR3/PRKAR1A/IL33/PIP5K1B/PIK3CB/ADCY3/RICTOR/AGO4/ESR2/TNKS2/CDKN1B/PDE1A/PPP2CB/TRAF6/PHLPP2/PSMC1/TNRC6C/FGFR2/PDGFRB/PRKCA/CAMK2D/MDM2/FGF16/REST/IRS2/STRN/RCOR1/MYD88/TNKS/PPP2R1B/IL1RAP/AKT3/TNRC6A/PREX2/CD28/TN…
WP_SIGNALING_OF_HEPATOCYTE_GROWTH_FACTOR_RECEPTOR	WP_SIGNALING_OF_HEPATOCYTE_GROWTH_FACTOR_RECEPTOR	34	-0.441643	-1.5033	0.03125	0.124477	0.0921273	8467	tags=50%, list=24%, signal=38%	MAPK8/PTEN/MAPK1/RAPGEF1/RAP1B/MAP2K1/DOCK1/ITGA1/SOS1/PIK3CA/PTPN11/PTK2B/MET/GAB1/RASA1/ITGB1/FOS
REACTOME_ROLE_OF_SECOND_MESSENGERS_IN_NETRIN_1_SIGNALING	REACTOME_ROLE_OF_SECOND_MESSENGERS_IN_NETRIN_1_SIGNALING	10	-0.671504	-1.65993	0.0316302	0.125667	0.0930087	9357	tags=70%, list=26%, signal=52%	TRPC7/PLCG1/PITPNA/TRPC6/TRPC3/TRPC4/TRPC5
WP_METABOLIC_REPROGRAMMING_IN_COLON_CANCER	WP_METABOLIC_REPROGRAMMING_IN_COLON_CANCER	42	0.477646	1.47516	0.0316547	0.125667	0.0930087	5991	tags=33%, list=17%, signal=28%	SLC16A3/SLC1A5/G6PD/PYCR1/TKT/SLC2A1/PYCR2/PKM/TALDO1/ENO1/GAPDH/RPIA/PGD/HK3
BIOCARTA_VIP_PATHWAY	BIOCARTA_VIP_PATHWAY	26	-0.485559	-1.54571	0.0317919	0.125738	0.0930613	8570	tags=46%, list=24%, signal=35%	PLCG1/CHUK/PRKAR2A/PRKACB/NFATC2/PPP3CA/PRKAR1A/MAP3K1/GNAQ/NFKB1/EGR2/EGR3
KEGG_GLYCOSAMINOGLYCAN_BIOSYNTHESIS_HEPARAN_SULFATE	KEGG_GLYCOSAMINOGLYCAN_BIOSYNTHESIS_HEPARAN_SULFATE	26	-0.487745	-1.55267	0.0317919	0.125738	0.0930613	4304	tags=35%, list=12%, signal=30%	NDST1/HS3ST3A1/B3GAT2/XYLT1/HS3ST1/HS6ST3/HS3ST2/B3GAT1/NDST3
BIOCARTA_BAD_PATHWAY	BIOCARTA_BAD_PATHWAY	25	-0.486606	-1.53298	0.0318841	0.125738	0.0930613	8164	tags=48%, list=23%, signal=37%	PRKAR2A/PRKACB/AKT1/MAPK1/PRKAR1A/PIK3CA/CSF2RB/BCL2/PIK3R1/KIT/PIK3CG/ADCY1
REACTOME_GLUCURONIDATION	REACTOME_GLUCURONIDATION	25	-0.494522	-1.55792	0.0318841	0.125738	0.0930613	2026	tags=40%, list=6%, signal=38%	UGP2/UGT2B15/UGT2B7/SLC35D1/UGT1A1/UGT2B10/UGT2A3/UGT1A4/UGT1A3/UGT2B17
REACTOME_METABOLISM_OF_ANGIOTENSINOGEN_TO_ANGIOTENSINS	REACTOME_METABOLISM_OF_ANGIOTENSINOGEN_TO_ANGIOTENSINS	18	-0.548569	-1.6014	0.032	0.125987	0.093245	6085	tags=44%, list=17%, signal=37%	ACE2/ANPEP/CPB2/MME/CTSG/CPA3/ENPEP/CMA1
REACTOME_PI_3K_CASCADE_FGFR4	REACTOME_PI_3K_CASCADE_FGFR4	20	-0.514946	-1.5563	0.0320856	0.126115	0.0933398	5076	tags=50%, list=14%, signal=43%	FGF16/PIK3CA/PTPN11/FRS2/FGF18/GAB1/FGF2/FGF20/PIK3R1/FGF23
KEGG_MELANOGENESIS	KEGG_MELANOGENESIS	101	-0.326704	-1.3445	0.0324074	0.12717	0.0941205	7489	tags=41%, list=21%, signal=32%	ADCY4/MAPK1/WNT3/DCT/FZD5/ADCY6/FZD3/CREB3L2/ADCY3/EDN1/KRAS/PRKCB/MAP2K1/PLCB4/GNAQ/WNT16/CTNNB1/PRKCA/FZD1/CAMK2D/CALML3/WNT11/CREBBP/ADCY7/EP300/ADCY9/EDNRB/FZD4/FZD8/MITF/KIT/CAMK2B/WNT5B/TYRP1/TYR/ADCY1/WNT2/WNT8B/WNT9B/GNAO1/WNT7A
KEGG_TIGHT_JUNCTION	KEGG_TIGHT_JUNCTION	131	-0.29822	-1.2789	0.0327869	0.128447	0.0950658	8004	tags=39%, list=22%, signal=30%	LLGL1/PTEN/CGN/CLDN2/EPB41L3/YES1/AKT1/CLDN6/MYH9/PPP2R2A/PATJ/PRKCQ/KRAS/CLDN14/PRKCZ/PRKCB/PARD6B/CASK/PPP2CB/CTNNB1/AFDN/MAP3K20/PRKCA/EPB41/CLDN1/TJP2/JAM2/PPP2R1B/AKT3/TJP1/MAGI1/MPP5/MYH3/PRKCE/PPP2R2B/PRKCH/MYH11/CLDN19/MYH10/AMOTL1/MYH7/MAGI2/CLDN20/MAGI3/OCLN/CLDN10/MYL7/CLDN16/CTNNA3/EPB41L1/MPDZ
WP_CARDIAC_PROGENITOR_DIFFERENTIATION	WP_CARDIAC_PROGENITOR_DIFFERENTIATION	53	0.459964	1.48331	0.0328767	0.128587	0.0951694	3633	tags=30%, list=10%, signal=27%	WNT3A/INS/TNNT2/NKX2-5/ISL1/IRX4/DKK1/MIXL1/TNNI3/LIN28B/ZFP42/SOX2/MESP1/PAX6/MYH6/ROR2
REACTOME_SIGNALING_BY_ERBB2	REACTOME_SIGNALING_BY_ERBB2	50	-0.414033	-1.50427	0.0330882	0.129202	0.0956245	5364	tags=34%, list=15%, signal=29%	ERBIN/PRKCA/USP8/DIAPH1/CUL5/AKT3/SOS1/PIK3CA/FYN/NRG3/PRKCE/EREG/GAB1/EGFR/ERBB2/PIK3R1/NRG1
BIOCARTA_EGFR_SMRTE_PATHWAY	BIOCARTA_EGFR_SMRTE_PATHWAY	11	-0.651313	-1.67562	0.0334928	0.130567	0.096635	10295	tags=73%, list=29%, signal=52%	MAPK14/RXRA/THRA/MAP3K1/MAP2K1/THRB/ZBTB16/EGFR
REACTOME_RHO_GTPASES_ACTIVATE_PKNS	REACTOME_RHO_GTPASES_ACTIVATE_PKNS	92	0.420493	1.4726	0.0336788	0.131077	0.0970125	9938	tags=49%, list=28%, signal=35%	KLK3/KLK2/SFN/H3C7/H2AC20/H2BC10/H3C11/H3C14/H3C4/H2AC18/H2BC9/H2AX/H2BU1/PKN1/H2AC14/H2AB1/H4C13/H4C11/H4C2/H2AC4/H4C5/H2AJ/H4C4/CDC25C/H2AC7/H2AC19/H4C14/H4C15/YWHAZ/H2AZ1/RAC1/PKN3/H4C1/H4C6/H2BC3/MYL9/H2BC14/H2BC17/RHOC/H2BC11/H2AC8/MYL6/H3-3A/KDM1A/PPP1R14A
REACTOME_TRANSCRIPTIONAL_REGULATION_BY_SMALL_RNAS	REACTOME_TRANSCRIPTIONAL_REGULATION_BY_SMALL_RNAS	105	0.399817	1.41918	0.0338346	0.131116	0.0970413	9321	tags=44%, list=26%, signal=33%	H3C7/H2AC20/H2BC10/H3C11/H3C14/H3C4/H2AC18/H2BC9/POLR2J/H2AX/H2BU1/H2AC14/POLR2I/H2AB1/H4C13/H4C11/POLR2H/H4C2/H2AC4/POLR2K/H4C5/POLR2L/H2AJ/H4C4/H2AC7/H2AC19/POLR2G/H4C14/NUP93/POLR2F/H4C15/H2AZ1/RAN/NUP62/H4C1/NUP210/H4C6/H2BC3/RAE1/NUP43/H2BC14/H2BC17/H2BC11/H2AC8/NUP37/NUP188
PID_PLK1_PATHWAY	PID_PLK1_PATHWAY	45	0.480945	1.50354	0.0338505	0.131116	0.0970413	7970	tags=44%, list=22%, signal=35%	CDC20/SPC24/PLK1/CDK1/CCNB1/NDC80/NUDC/KIF20A/TPX2/BUB1B/SGO1/CDC25C/AURKA/PPP2R1A/ERCC6L/TUBG1/BUB1/CDC25B/CENPE/PRC1
BIOCARTA_CLASSIC_PATHWAY	BIOCARTA_CLASSIC_PATHWAY	14	-0.581334	-1.5691	0.0338542	0.131116	0.0970413	6658	tags=71%, list=19%, signal=58%	C9/C3/C5/C1R/C4A/C4B/C1S/C8A/C6/C7
WP_GENES_RELATED_TO_PRIMARY_CILIUM_DEVELOPMENT_BASED_ON_CRISPR	WP_GENES_RELATED_TO_PRIMARY_CILIUM_DEVELOPMENT_BASED_ON_CRISPR	99	-0.327559	-1.32996	0.0339806	0.131392	0.0972452	8550	tags=39%, list=24%, signal=30%	TRAF3IP1/KIF3A/TTC21B/CEP295/C2CD3/WDR19/IFT81/TTC30B/WDR35/IFT140/CPLANE2/TTBK2/BBS9/CEP104/ARL13B/FUZ/TMEM17/CEP44/CEP76/BBS4/BBS1/KIF3B/TTC8/IFT46/LZTFL1/BBS2/WDR60/CEP192/CPLANE1/MIB1/TMEM231/BBS10/CEP120/TRAPPC11/RAB23/WDPCP/DYNC2H1/TUBE1/EVC
KEGG_COLORECTAL_CANCER	KEGG_COLORECTAL_CANCER	62	-0.376953	-1.43973	0.0342205	0.132105	0.0977729	9193	tags=50%, list=26%, signal=37%	TCF7L2/TGFB2/TGFBR1/PIK3R3/PIK3R5/MAPK8/ARAF/GSK3B/APC2/SMAD3/BRAF/AKT1/SMAD4/APPL1/MAPK1/AXIN2/PIK3CB/KRAS/TGFB3/MAP2K1/CTNNB1/AKT3/PIK3CA/CCND1/MSH3/BCL2/APC/TGFBR2/PIK3R1/PIK3CG/FOS
REACTOME_GLUTATHIONE_CONJUGATION	REACTOME_GLUTATHIONE_CONJUGATION	35	-0.435144	-1.49946	0.0345912	0.133319	0.0986718	6493	tags=29%, list=18%, signal=23%	GGT5/GSTM2/GSTA1/GCLC/GSTA5/GSTT2B/GSTZ1/GSTA2/GSTM5/GSTM1
PID_S1P_S1P3_PATHWAY	PID_S1P_S1P3_PATHWAY	29	-0.480939	-1.57349	0.0352941	0.135808	0.100514	7589	tags=48%, list=21%, signal=38%	AKT1/GNA13/MAPK1/ITGAV/GNAQ/PDGFRB/AKT3/JAK2/FLT1/S1PR3/S1PR1/GNA14/ITGB3/GNAO1
REACTOME_HSF1_ACTIVATION	REACTOME_HSF1_ACTIVATION	31	0.517343	1.49858	0.0356083	0.136575	0.101082	9275	tags=52%, list=26%, signal=38%	HSPB1/HSPA6/HSPA1A/HSPA1B/HSF1/CRYBA4/RLN1/SERPINH1/MRPL18/GML/FKBP4/DNAJB1/HSPH1/HSPB2/HSBP1/HSP90AB1
WP_GASTRIC_CANCER_NETWORK_2	WP_GASTRIC_CANCER_NETWORK_2	31	0.5185	1.50193	0.0356083	0.136575	0.101082	8496	tags=48%, list=24%, signal=37%	UBE2C/S100A6/UBE2T/COL9A3/CACYBP/LMNB2/DSCC1/CHTF18/BRIX1/RFC4/SNURF/FANCI/ATAD2/TOP2A/PLAC8
REACTOME_ROS_AND_RNS_PRODUCTION_IN_PHAGOCYTES	REACTOME_ROS_AND_RNS_PRODUCTION_IN_PHAGOCYTES	36	0.500779	1.51492	0.0357143	0.136761	0.101219	5838	tags=42%, list=16%, signal=35%	ATP6V1G3/ATP6V0D2/LPO/ATP6V1B1/ATP6V0A4/SLC11A1/ATP6V0B/CYBA/ATP6V1F/TCIRG1/NCF2/NCF4/ATP6V1C2/ATP6V0E1/NCF1
WP_IRINOTECAN_PATHWAY	WP_IRINOTECAN_PATHWAY	13	-0.586752	-1.58069	0.0360825	0.137949	0.102098	4929	tags=46%, list=14%, signal=40%	ABCC2/BCHE/ABCG2/UGT1A1/SLCO1B1/CYP3A4
REACTOME_NEUROTRANSMITTER_RECEPTORS_AND_POSTSYNAPTIC_SIGNAL_TRANSMISSION	REACTOME_NEUROTRANSMITTER_RECEPTORS_AND_POSTSYNAPTIC_SIGNAL_TRANSMISSION	205	0.345062	1.32111	0.0364277	0.139045	0.10291	6515	tags=29%, list=18%, signal=24%	TUBA3E/TUBA3C/CHRNB3/GRIK2/GABRA3/KCNJ9/GNG4/CACNG4/HTR3E/CHRNA1/TUBB8/ACTN2/GRIA2/TUBAL3/ERBB4/GNG8/ADCY8/NEFL/CHRNA9/GABRB2/PRKCG/TUBA4B/GNGT1/HRAS/HTR3B/CHRND/TUBA4A/LIN7B/HTR3A/TUBB8B/GABRR1/GNG13/GRIA1/TUBB4B/GRIK5/GABRR3/CACNG2/GABRB1/AP2S1/GNB3/GABRA5/NRGN/GRIN2D/TUBA3D/KPNA2/GABRG2/HTR3C/GABRQ/TUBB4A/GABRG3/GIT1/GRIN1/TUBA1C/GRIK1/GABRA6/PRKAG3/CHRNA2/MAPK3/TUBB2B/CHRNG
KEGG_MELANOMA	KEGG_MELANOMA	71	-0.353186	-1.37682	0.0367347	0.139992	0.103611	8987	tags=54%, list=25%, signal=40%	FGF13/FGF10/PIK3R3/CDKN1A/PIK3R5/ARAF/PTEN/BRAF/FGF11/AKT1/MAPK1/FGF1/FGF12/PIK3CB/KRAS/MAP2K1/RB1/PDGFRB/MDM2/FGF16/CDK6/AKT3/PIK3CA/CCND1/PDGFC/MET/FGF18/MITF/EGFR/FGF2/FGF20/CDH1/PIK3R1/FGF7/PIK3CG/FGF23/PDGFD/FGF5
REACTOME_CELLULAR_SENESCENCE	REACTOME_CELLULAR_SENESCENCE	194	0.346101	1.31409	0.0368171	0.140017	0.103629	9437	tags=36%, list=26%, signal=26%	HMGA2/UBE2C/UBE2S/H3C7/CBX2/H2AC20/H2BC10/H3C11/H3C14/H3C4/H2AC18/CDKN2A/H2BC9/HMGA1/H2AX/H3-4/H2BU1/E2F2/H2AC14/TXN/ANAPC11/H2AB1/H4C13/H4C11/MAPKAPK2/H4C2/UBA52/H2AC4/ACD/IL1A/H4C5/H1-2/CDKN2D/H2AJ/H4C4/ANAPC7/H1-1/CXCL8/H2AC7/RPS27A/IFNB1/H2AC19/CCNA1/E2F1/CEBPB/H1-5/H1-4/EHMT2/MAPK3/H4C14/H4C15/CBX8/H2AZ1/EZH2/CDKN2C/MDM4/H4C1/H4C6/H2BC3/CDC16/CBX4/UBE2E1/H2BC14/H2BC17/H2BC11/H2AC8/CCNA2/MAPK…
WP_CORI_CYCLE	WP_CORI_CYCLE	17	0.593296	1.50596	0.036859	0.140017	0.103629	4601	tags=41%, list=13%, signal=36%	INS/G6PD/SLC2A1/ALDOA/PGK2/TALDO1/GAPDH
WP_HEAD_AND_NECK_SQUAMOUS_CELL_CARCINOMA	WP_HEAD_AND_NECK_SQUAMOUS_CELL_CARCINOMA	74	-0.355879	-1.39417	0.0373444	0.141635	0.104826	6856	tags=43%, list=19%, signal=35%	EIF4E/MIRLET7C/PIK3CB/KRAS/RICTOR/BIRC2/SESN1/TP63/CUL3/PRKAA1/CTNNB1/RB1/FGFR2/AJUBA/NFE2L2/NFKB1/CDK6/AKT3/NUMB/PIK3CA/CCND1/PDPK1/MTOR/FAT1/GAB1/NOTCH2/EGFR/REL/TGFBR2/ERBB2/PIK3R1/PIK3CG
WP_PATHOGENIC_ESCHERICHIA_COLI_INFECTION	WP_PATHOGENIC_ESCHERICHIA_COLI_INFECTION	55	0.448014	1.44563	0.037448	0.141801	0.10495	7126	tags=38%, list=20%, signal=31%	TUBA3E/TUBA3C/LY96/TUBB8/TUBAL3/TUBA4A/ARPC4/TUBB4B/ARPC1B/ARPC5L/ARHGEF2/ARPC5/TUBA3D/ARPC3/TUBB4A/TUBA1C/ACTB/TUBB2B/YWHAZ/TUBA1A/KRT18
REACTOME_HCMV_LATE_EVENTS	REACTOME_HCMV_LATE_EVENTS	113	0.384754	1.37554	0.0376412	0.142116	0.105183	9682	tags=44%, list=27%, signal=32%	H3C7/H2AC20/H2BC10/H3C11/H3C14/H3C4/H2AC12/H2AC18/VPS28/H2AW/H2BC9/H2BU1/H2AC14/H2AC21/H4C13/H4C11/H4C2/H2AC4/CHMP2A/H4C5/H4C4/SNF8/CHMP4A/MVB12A/H2AC7/CEBPD/H2AC19/H4C14/NUP93/CHMP4C/H4C15/H2AC17/CHMP4B/NUP62/H4C1/NUP210/H4C6/H2BC3/RAE1/NUP43/H2BC14/H2BC17/VPS4A/H2BC11/H2AC8/VPS25/NUP37/NUP188/CHMP1A/VPS37C
REACTOME_ATTENUATION_PHASE	REACTOME_ATTENUATION_PHASE	28	0.530644	1.49663	0.0376506	0.142116	0.105183	9275	tags=57%, list=26%, signal=42%	HSPB1/HSPA6/HSPA1A/HSPA1B/HSF1/CRYBA4/RLN1/SERPINH1/MRPL18/GML/FKBP4/DNAJB1/HSPH1/HSPB2/HSBP1/HSP90AB1
REACTOME_ACTIVATION_OF_ANTERIOR_HOX_GENES_IN_HINDBRAIN_DEVELOPMENT_DURING_EARLY_EMBRYOGENESIS	REACTOME_ACTIVATION_OF_ANTERIOR_HOX_GENES_IN_HINDBRAIN_DEVELOPMENT_DURING_EARLY_EMBRYOGENESIS	120	0.383657	1.38102	0.037831	0.142571	0.105519	9350	tags=41%, list=26%, signal=30%	HOXD4/H3C7/H2AC20/HOXD1/H2BC10/H3C11/H3C14/H3C4/H2AC18/HOXD3/HOXC4/H2BC9/POLR2J/H2AX/H2BU1/H2AC14/POLR2I/H2AB1/PAX6/H4C13/H4C11/POLR2H/H4C2/H2AC4/POLR2K/H4C5/POLR2L/H2AJ/H4C4/H2AC7/H2AC19/PCGF2/POLR2G/H4C14/POLR2F/H4C15/H2AZ1/EZH2/HOXA4/WDR5/H4C1/H4C6/H2BC3/CNOT9/H2BC14/H2BC17/H2BC11/H2AC8/ZNF335
KEGG_BASE_EXCISION_REPAIR	KEGG_BASE_EXCISION_REPAIR	35	0.505088	1.50797	0.0380117	0.142797	0.105686	10345	tags=51%, list=29%, signal=37%	NEIL3/POLD1/SMUG1/HMGB1P40/NTHL1/POLE4/MUTYH/OGG1/POLE2/POLB/PARP1/POLD2/LIG1/XRCC1/FEN1/HMGB1P1/PCNA/APEX2
PID_LPA4_PATHWAY	PID_LPA4_PATHWAY	15	-0.561413	-1.5674	0.0380711	0.142797	0.105686	8638	tags=73%, list=24%, signal=56%	ADCY5/CREB1/ADCY4/ADCY6/ADCY3/ADCY7/ADCY9/RPS6KA5/PRKCE/LPAR4/ADCY1
REACTOME_N_GLYCAN_ANTENNAE_ELONGATION	REACTOME_N_GLYCAN_ANTENNAE_ELONGATION	15	-0.55481	-1.54896	0.0380711	0.142797	0.105686	2982	tags=67%, list=8%, signal=61%	B4GALT4/B4GALT1/MGAT4A/ST6GAL1/MGAT5/B4GALT5/ST8SIA2/MGAT4C/ST8SIA3/ST8SIA6
PID_MYC_ACTIV_PATHWAY	PID_MYC_ACTIV_PATHWAY	79	0.415004	1.41994	0.0382082	0.142962	0.105808	8486	tags=38%, list=24%, signal=29%	MMP9/NME1/BIRC5/CDC25A/SLC2A1/CDCA7/LIN28B/HMGA1/CCNB1/NDUFAF2/PMAIP1/TAF10/KAT2A/TK1/RUVBL2/BAX/ENO1/GAPDH/SERPINI1/RPL11/RUVBL1/NME2/HSPA4/FOSL1/SUPT3H/PTMA/NPM1/TERT/PEG10/BCAT1
WP_LIPID_METABOLISM_PATHWAY	WP_LIPID_METABOLISM_PATHWAY	29	-0.476509	-1.55899	0.0382353	0.142962	0.105808	9762	tags=59%, list=27%, signal=43%	ACSS2/AKT2/PNPLA2/PRKAB2/PRKAR2A/PRKACB/AKT1/ABHD5/FASN/ACSBG1/PRKAR1A/PRKAA1/AKT3/LIPE/PLIN1/PRKAG2/BCKDHA
PID_EPHRINB_REV_PATHWAY	PID_EPHRINB_REV_PATHWAY	30	-0.477671	-1.56736	0.0385757	0.14391	0.10651	5291	tags=30%, list=15%, signal=26%	EPHB1/EFNB2/PIK3CA/FYN/TIAM1/PIK3R1/ITGB3/PTPN13/BLK
KEGG_ADIPOCYTOKINE_SIGNALING_PATHWAY	KEGG_ADIPOCYTOKINE_SIGNALING_PATHWAY	67	-0.371346	-1.44963	0.03861	0.14391	0.10651	5921	tags=36%, list=17%, signal=30%	TNF/PRKAA1/CD36/IRS2/NFKB1/AKT3/JAK2/PTPN11/PPARGC1A/ADIPOR2/MTOR/IRS1/PPARA/ACSL5/PCK2/ACACB/ACSL6/ACSL1/G6PC/CPT1A/PRKAG2/PCK1/ADIPOQ/LEPR
WP_MELATONIN_METABOLISM_AND_EFFECTS	WP_MELATONIN_METABOLISM_AND_EFFECTS	38	-0.419408	-1.4763	0.0392157	0.145939	0.108012	6579	tags=47%, list=18%, signal=39%	CRY1/EDN1/TRAF6/CRY2/ECE1/PRKCA/ARNTL/PER2/NFKB1/SIRT1/MAOA/CYP1A1/CLOCK/PER3/CYP1B1/FOXO1/CYP2C19/CYP1A2
REACTOME_TRANSLOCATION_OF_SLC2A4_GLUT4_TO_THE_PLASMA_MEMBRANE	REACTOME_TRANSLOCATION_OF_SLC2A4_GLUT4_TO_THE_PLASMA_MEMBRANE	72	0.418075	1.41641	0.0393185	0.146093	0.108126	6936	tags=28%, list=19%, signal=22%	TUBA3E/TUBA3C/TUBB8/SFN/TUBAL3/TUBA4B/TUBA4A/TUBB8B/TUBB4B/RAB13/TUBA3D/TUBB4A/TUBA1C/ACTB/PRKAG3/ASPSCR1/TUBB2B/YWHAZ/TUBA1A/STX4
REACTOME_CONDENSATION_OF_PROMETAPHASE_CHROMOSOMES	REACTOME_CONDENSATION_OF_PROMETAPHASE_CHROMOSOMES	11	0.6796	1.54698	0.0393836	0.146106	0.108136	3940	tags=45%, list=11%, signal=40%	CDK1/CCNB1/NCAPG/CSNK2B/CCNB2
REACTOME_INTERACTION_BETWEEN_L1_AND_ANKYRINS	REACTOME_INTERACTION_BETWEEN_L1_AND_ANKYRINS	31	-0.446835	-1.47438	0.0396341	0.146717	0.108588	6670	tags=48%, list=19%, signal=39%	SCN2A/SCN8A/SPTB/SCN3A/KCNQ2/SCN10A/SPTBN1/ANK3/SCN9A/NFASC/ANK1/SCN4A/SCN7A/SCN4B/SPTBN2
REACTOME_GAP_JUNCTION_TRAFFICKING_AND_REGULATION	REACTOME_GAP_JUNCTION_TRAFFICKING_AND_REGULATION	51	0.45623	1.46632	0.0396717	0.146717	0.108588	7136	tags=43%, list=20%, signal=35%	TUBA3E/TUBA3C/GJB7/TUBB8/TUBAL3/TUBA4B/TUBA4A/GJB6/TUBB8B/CLTB/CLTA/GJD4/TUBB4B/DNM1/TUBA3D/TUBB4A/GJC2/TUBA1C/ACTB/TUBB2B/TUBA1A/SRC
KEGG_TYPE_I_DIABETES_MELLITUS	KEGG_TYPE_I_DIABETES_MELLITUS	41	0.47827	1.47488	0.0400572	0.147709	0.109322	7637	tags=44%, list=21%, signal=35%	INS/GAD1/PTPRN/GAD2/HLA-DMA/GZMB/HLA-DRB1/HLA-DQB1/HLA-A/IL1A/HLA-F/HLA-DOB/HLA-DRB5/HLA-G/HLA-B/HLA-DQA2/IL12A/HLA-DPB1
REACTOME_KSRP_KHSRP_BINDS_AND_DESTABILIZES_MRNA	REACTOME_KSRP_KHSRP_BINDS_AND_DESTABILIZES_MRNA	17	0.59188	1.50237	0.0400641	0.147709	0.109322	9363	tags=59%, list=26%, signal=43%	EXOSC4/EXOSC5/EXOSC1/EXOSC7/EXOSC3/YWHAZ/EXOSC8/EXOSC9/EXOSC2/MAPK11
WP_FLUOROPYRIMIDINE_ACTIVITY	WP_FLUOROPYRIMIDINE_ACTIVITY	33	-0.438779	-1.47651	0.0403727	0.148616	0.109994	3065	tags=24%, list=9%, signal=22%	DHFR/UPB1/DPYS/DPYD/ABCG2/SLC22A7/CYP2A6/UPP2
REACTOME_SYNTHESIS_SECRETION_AND_INACTIVATION_OF_GLUCOSE_DEPENDENT_INSULINOTROPIC_POLYPEPTIDE_GIP_	REACTOME_SYNTHESIS_SECRETION_AND_INACTIVATION_OF_GLUCOSE_DEPENDENT_INSULINOTROPIC_POLYPEPTIDE_GIP_	13	0.643046	1.55298	0.0407166	0.149096	0.110348	5514	tags=46%, list=15%, signal=39%	GIP/ISL1/FFAR1/PAX6/PCSK1/GPR119
BIOCARTA_EGF_PATHWAY	BIOCARTA_EGF_PATHWAY	27	-0.473526	-1.52001	0.0408163	0.149096	0.110348	6213	tags=63%, list=17%, signal=52%	ELK1/MAP2K4/STAT3/PLCG1/MAPK8/STAT1/MAP3K1/PRKCB/MAP2K1/PRKCA/SOS1/PIK3CA/JAK1/EGFR/RASA1/PIK3R1/FOS
REACTOME_GLYCOGEN_METABOLISM	REACTOME_GLYCOGEN_METABOLISM	27	-0.474269	-1.5224	0.0408163	0.149096	0.110348	3391	tags=37%, list=9%, signal=34%	PHKB/GBE1/UGP2/EPM2A/PGM2/PYGL/PGM1/PHKA1/AGL/GYS2
WP_ARYL_HYDROCARBON_RECEPTOR_NETPATH	WP_ARYL_HYDROCARBON_RECEPTOR_NETPATH	46	-0.406096	-1.47303	0.0408163	0.149096	0.110348	6477	tags=50%, list=18%, signal=41%	KRAS/CDKN1B/MAP2K1/TNF/RB1/CD36/LPL/GCLC/NF1/NCOA7/NFE2L2/NFKB1/AHR/KLF6/EP300/CYP1A1/CYP1B1/RET/EGFR/NRIP1/PTGS2/CYP1A2/ESR1
WP_STEROL_REGULATORY_ELEMENTBINDING_PROTEINS_SREBP_SIGNALLING	WP_STEROL_REGULATORY_ELEMENTBINDING_PROTEINS_SREBP_SIGNALLING	71	-0.352916	-1.37577	0.0408163	0.149096	0.110348	7589	tags=42%, list=21%, signal=33%	AKT1/FASN/SEC31A/SP1/SCD/HMGCR/GPAM/RBP4/MBTPS1/SAR1B/PRKAA1/INSIG2/LPL/SEC24B/LPIN1/INSIG1/MBTPS2/SIRT1/AMFR/PIK3CA/SEC31B/MTOR/SEC24D/LDLR/SEC24A/HMGCS1/SEC23A/SEC24C/PRKAG2/CYP51A1
REACTOME_SYNTHESIS_OF_LEUKOTRIENES_LT_AND_EOXINS_EX_	REACTOME_SYNTHESIS_OF_LEUKOTRIENES_LT_AND_EOXINS_EX_	21	-0.50083	-1.53749	0.0409836	0.149477	0.110631	3461	tags=48%, list=10%, signal=43%	CYP4F11/CYP4F22/GGT5/CYP4F8/CYP4F3/ALOX15/CYP4A11/CYP4B1/CYP4F2/CYP4A22
REACTOME_SIGNALING_BY_MET	REACTOME_SIGNALING_BY_MET	79	-0.341036	-1.3557	0.0411523	0.149713	0.110805	7423	tags=42%, list=21%, signal=33%	RANBP10/PTPRJ/COL5A3/EPS15/LAMB2/STAM2/RAPGEF1/CBL/RAP1B/KRAS/COL1A2/LRIG1/DOCK7/USP8/COL1A1/FN1/COL5A1/ITGA2/SOS1/PIK3CA/PTPN11/TNS3/MET/LAMB3/LAMC2/LAMC3/GAB1/COL3A1/ITGB1/PIK3R1/LAMA3/SH3GL2/LAMA2
BIOCARTA_P53_PATHWAY	BIOCARTA_P53_PATHWAY	16	-0.556574	-1.56837	0.0412371	0.149713	0.110805	6236	tags=56%, list=17%, signal=46%	CCNE1/RB1/MDM2/ATM/CCND1/BCL2/APAF1/GADD45A/TIMP3
KEGG_PANTOTHENATE_AND_COA_BIOSYNTHESIS	KEGG_PANTOTHENATE_AND_COA_BIOSYNTHESIS	16	-0.556991	-1.56954	0.0412371	0.149713	0.110805	3512	tags=44%, list=10%, signal=39%	ENPP1/PANK3/UPB1/DPYS/VNN1/DPYD/PANK1
BIOCARTA_FIBRINOLYSIS_PATHWAY	BIOCARTA_FIBRINOLYSIS_PATHWAY	12	-0.59302	-1.57126	0.0416667	0.150583	0.111449	10396	tags=67%, list=29%, signal=47%	FGB/FGG/FGA/F2/CPB2/PLAT/F2R/PLG
BIOCARTA_RANKL_PATHWAY	BIOCARTA_RANKL_PATHWAY	14	-0.57018	-1.53899	0.0416667	0.150583	0.111449	9311	tags=71%, list=26%, signal=53%	IRF9/FOSL2/IFNAR2/MAPK8/EIF2AK2/TRAF6/IFNAR1/NFKB1/FOS/TNFSF11
WP_STRIATED_MUSCLE_CONTRACTION_PATHWAY	WP_STRIATED_MUSCLE_CONTRACTION_PATHWAY	38	0.477537	1.44941	0.0416667	0.150583	0.111449	4395	tags=32%, list=12%, signal=28%	TNNI2/TNNT2/TNNC1/ACTN2/MYL3/ACTA1/TPM2/TNNI3/TNNT1/MYH8/MYH6/MYBPC3
WP_PATHWAYS_AFFECTED_IN_ADENOID_CYSTIC_CARCINOMA	WP_PATHWAYS_AFFECTED_IN_ADENOID_CYSTIC_CARCINOMA	65	-0.36566	-1.41326	0.0418251	0.150697	0.111534	8373	tags=49%, list=23%, signal=38%	ARID5B/NSD1/KANSL1/PTEN/FBXW7/KDM6B/AKT1/MYBL1/KAT6A/SETD2/BCOR/DTX4/ERBIN/FGF16/CREBBP/ARID1A/CMTR2/SMC1A/MAML3/ATM/MAGI1/PIK3CA/EP300/ATRX/KDM6A/NCOR1/KMT2C/SMARCA2/JMJD1C/MAGI2/ERBB2/FOXP2
WP_RAC1PAK1P38MMP2_PATHWAY	WP_RAC1PAK1P38MMP2_PATHWAY	68	-0.357084	-1.40735	0.0418251	0.150697	0.111534	6477	tags=35%, list=18%, signal=29%	KRAS/ANGPT4/NCK1/STAT5B/CTNNB1/TNIP3/TIE1/NFKB1/MMP2/FN1/SOS1/PIK3CA/PTPN11/YAP1/FOXO1/EGFR/RASA1/ITGB1/ERBB2/PIK3R1/NOS2/TEK/NOS1/ANGPTL1
WP_INTEGRINMEDIATED_CELL_ADHESION	WP_INTEGRINMEDIATED_CELL_ADHESION	102	-0.32772	-1.34507	0.0424528	0.152727	0.113036	7952	tags=40%, list=22%, signal=31%	ROCK2/ITGA11/CAV1/BRAF/AKT1/MAPK1/ITGAV/ITGA7/RAPGEF1/RAP1B/ITGA6/CAPN7/MAPK6/MAP2K1/ITGB8/TNS1/GIT2/ITGA8/ITGA10/AKT3/DOCK1/MAP2K6/ITGA1/ITGA2/SOS1/CAPN5/PDPK1/CAV2/FYN/ILK/MAPK4/CAPN3/ROCK1/ITGB7/SORBS1/ITGB1/ITGA9/ITGAD/SELENOP/ITGB3/ITGA4
REACTOME_CROSSLINKING_OF_COLLAGEN_FIBRILS	REACTOME_CROSSLINKING_OF_COLLAGEN_FIBRILS	18	-0.528434	-1.54262	0.0426667	0.152861	0.113135	6186	tags=50%, list=17%, signal=41%	COL1A2/PXDN/COL4A2/COL4A6/COL1A1/COL4A1/TLL1/COL4A3/COL4A4
WP_MIR5093P_ALTERATION_OF_YAP1ECM_AXIS	WP_MIR5093P_ALTERATION_OF_YAP1ECM_AXIS	18	-0.527394	-1.53958	0.0426667	0.152861	0.113135	4656	tags=44%, list=13%, signal=39%	COL1A1/EDNRA/FN1/COL5A1/YAP1/TEAD1/COL3A1/THBS2
REACTOME_GENE_SILENCING_BY_RNA	REACTOME_GENE_SILENCING_BY_RNA	136	0.369715	1.36226	0.0426829	0.152861	0.113135	9884	tags=43%, list=28%, signal=31%	DDX4/TDRD1/H3C7/H2AC20/H2BC10/H3C11/H3C14/H3C4/H2AC18/FKBP6/H2BC9/POLR2J/H2AX/MAEL/H2BU1/H2AC14/POLR2I/H2AB1/H4C13/H4C11/POLR2H/H4C2/H2AC4/POLR2K/H4C5/POLR2L/TDRKH/H2AJ/H4C4/H2AC7/H2AC19/POLR2G/H4C14/NUP93/POLR2F/H4C15/TDRD9/H2AZ1/TDRD6/RAN/TSNAX/NUP62/H4C1/NUP210/H4C6/H2BC3/RAE1/NUP43/H2BC14/H2BC17/H2BC11/H2AC8/NUP37/NUP188/XPO5/AGO2/PLD6/H3-3A
NABA_COLLAGENS	NABA_COLLAGENS	44	-0.409084	-1.46904	0.0430464	0.153526	0.113627	4857	tags=39%, list=14%, signal=33%	COL4A2/COL4A6/COL1A1/COL5A1/COL18A1/COL22A1/COL4A1/COL15A1/COL12A1/COL3A1/COL8A1/COL4A3/COL4A4/COL14A1/COL6A6/COL10A1/COL25A1
REACTOME_COLLAGEN_CHAIN_TRIMERIZATION	REACTOME_COLLAGEN_CHAIN_TRIMERIZATION	44	-0.409084	-1.46904	0.0430464	0.153526	0.113627	4857	tags=39%, list=14%, signal=33%	COL4A2/COL4A6/COL1A1/COL5A1/COL18A1/COL22A1/COL4A1/COL15A1/COL12A1/COL3A1/COL8A1/COL4A3/COL4A4/COL14A1/COL6A6/COL10A1/COL25A1
REACTOME_MITOCHONDRIAL_FATTY_ACID_BETA_OXIDATION_OF_SATURATED_FATTY_ACIDS	REACTOME_MITOCHONDRIAL_FATTY_ACID_BETA_OXIDATION_OF_SATURATED_FATTY_ACIDS	11	-0.63428	-1.6318	0.0430622	0.153526	0.113627	5569	tags=64%, list=16%, signal=54%	HADH/HADHA/ACADS/HADHB/ACADL/ACADM/ACSM3
REACTOME_REGULATION_OF_RAS_BY_GAPS	REACTOME_REGULATION_OF_RAS_BY_GAPS	68	0.421248	1.39954	0.0433018	0.153801	0.113831	10262	tags=44%, list=29%, signal=32%	RASAL1/PSMD4/PSMB4/HRAS/PSMB3/SEM1/UBA52/RBX1/PSMB6/PSMB9/RPS27A/PSMB8/PSME2/PSMB1/PSMD13/PSMB7/PSMC4/PSMC5/PSMC3/PSMD14/PSMA4/PSMB2/PSMB5/PSMA7/PSMD8/PSMA3/PSMA5/PSMA1/PSMB11/PSMA2
KEGG_SPHINGOLIPID_METABOLISM	KEGG_SPHINGOLIPID_METABOLISM	39	-0.418803	-1.4803	0.0433333	0.153801	0.113831	6253	tags=44%, list=17%, signal=36%	SPHK2/SPTLC2/SGPP1/NEU3/GALC/SGMS1/SPTLC1/PLPP1/ENPP7/DEGS2/ASAH2/SGMS2/SGPP2/PLPP3/ACER2/ACER1/SMPD3
WP_PDGF_PATHWAY	WP_PDGF_PATHWAY	39	-0.423125	-1.49558	0.0433333	0.153801	0.113831	9704	tags=56%, list=27%, signal=41%	ELK1/MAP2K4/VAV2/STAT3/PLCG1/MAPK8/STAT1/CHUK/MAPK1/MAP3K1/MAP2K1/PDGFRB/NFKB1/SOS1/WASL/PTPN11/JAK1/PLA2G4A/RASA1/TIAM1/PIK3R1/FOS
PID_TGFBR_PATHWAY	PID_TGFBR_PATHWAY	54	-0.390637	-1.46304	0.0434783	0.154085	0.114041	9004	tags=52%, list=25%, signal=39%	TGFB2/TGFBR1/WWP1/SMAD3/RPS6KB1/XIAP/CAV1/SMURF2/SMAD4/PPP2R2A/TGFB3/ZFYVE16/PPP2CB/SMURF1/CTNNB1/SMAD7/ZFYVE9/SOS1/TAB2/SPTBN1/CCN2/YAP1/PDPK1/RNF111/ITCH/TGFBR2/TGFBR3/OCLN
SIG_IL4RECEPTOR_IN_B_LYPHOCYTES	SIG_IL4RECEPTOR_IN_B_LYPHOCYTES	27	-0.469415	-1.50681	0.0437318	0.154753	0.114536	8322	tags=56%, list=23%, signal=43%	GSK3B/STAT6/AKT1/MAPK1/PPP1R13B/IRS2/AKT3/SOS1/PIK3CA/PDPK1/JAK1/BCL2/IRS1/SOS2/PIK3R1
WP_CELLTYPE_DEPENDENT_SELECTIVITY_OF_CCK2R_SIGNALING	WP_CELLTYPE_DEPENDENT_SELECTIVITY_OF_CCK2R_SIGNALING	13	0.640449	1.54671	0.0439739	0.155327	0.11496	1482	tags=23%, list=4%, signal=22%	CCK/CCKBR/CNR1
REACTOME_PCNA_DEPENDENT_LONG_PATCH_BASE_EXCISION_REPAIR	REACTOME_PCNA_DEPENDENT_LONG_PATCH_BASE_EXCISION_REPAIR	21	0.552923	1.46129	0.0440252	0.155327	0.11496	10186	tags=52%, list=28%, signal=38%	RFC4/POLD1/POLE4/RFC2/POLE2/POLB/POLD2/LIG1/FEN1/RPA3/PCNA
REACTOME_PYRIMIDINE_CATABOLISM	REACTOME_PYRIMIDINE_CATABOLISM	12	-0.58873	-1.5599	0.0441176	0.155327	0.11496	3875	tags=50%, list=11%, signal=45%	NT5E/UPB1/DPYS/DPYD/AGXT2/UPP2
KEGG_BIOSYNTHESIS_OF_UNSATURATED_FATTY_ACIDS	KEGG_BIOSYNTHESIS_OF_UNSATURATED_FATTY_ACIDS	22	-0.48195	-1.49975	0.0441989	0.155327	0.11496	8657	tags=64%, list=24%, signal=48%	HSD17B12/HADHA/ACOT1/SCD/PECR/FADS1/ELOVL6/ELOVL5/ACOT2/HACD2/ACAA1/BAAT/ACOX1/SCD5
WP_WNT_SIGNALING_PATHWAY_NETPATH	WP_WNT_SIGNALING_PATHWAY_NETPATH	51	-0.402669	-1.47163	0.0442804	0.155327	0.11496	7589	tags=43%, list=21%, signal=34%	AKT1/NFATC2/MAPK1/CSNK1G1/AXIN2/PIP5K1B/GJA1/PRKCB/CTNNB1/PRKCA/GCKR/CDK6/ROR1/CCND1/LRP5/TCF4/MTOR/APC/CSNK1A1/LRP6/TEK/SOX1
REACTOME_AGGREPHAGY	REACTOME_AGGREPHAGY	44	0.463487	1.44369	0.0442857	0.155327	0.11496	6920	tags=41%, list=19%, signal=33%	TUBA3E/TUBA3C/TUBB8/CETN1/TUBAL3/TUBA4B/TUBA4A/TUBB8B/HSF1/TUBB4B/UBA52/DYNLL1/TUBA3D/RPS27A/TUBB4A/TUBA1C/TUBB2B/TUBA1A
BIOCARTA_PDGF_PATHWAY	BIOCARTA_PDGF_PATHWAY	28	-0.467231	-1.51474	0.0443787	0.155423	0.115032	6213	tags=61%, list=17%, signal=50%	ELK1/MAP2K4/STAT3/PLCG1/MAPK8/STAT1/MAP3K1/PRKCB/MAP2K1/PRKCA/SOS1/PIK3CA/JAK1/RASA1/PIK3R1/PIK3CG/FOS
PID_IL2_STAT5_PATHWAY	PID_IL2_STAT5_PATHWAY	30	-0.467664	-1.53453	0.0445104	0.155427	0.115034	4587	tags=37%, list=13%, signal=32%	STAT5B/CDK6/SOS1/PIK3CA/PTPN11/ELF1/JAK1/BCL2/IL2RB/PIK3R1/FOXP3
REACTOME_MET_ACTIVATES_PTK2_SIGNALING	REACTOME_MET_ACTIVATES_PTK2_SIGNALING	30	-0.463007	-1.51925	0.0445104	0.155427	0.115034	4656	tags=40%, list=13%, signal=35%	COL1A1/FN1/COL5A1/ITGA2/MET/LAMB3/LAMC2/LAMC3/COL3A1/ITGB1/LAMA3/LAMA2
KEGG_AUTOIMMUNE_THYROID_DISEASE	KEGG_AUTOIMMUNE_THYROID_DISEASE	48	0.457758	1.4458	0.0448179	0.156271	0.115659	6805	tags=33%, list=19%, signal=27%	CGA/IL4/HLA-DMA/GZMB/HLA-DRB1/HLA-DQB1/HLA-A/HLA-F/HLA-DOB/HLA-DRB5/HLA-G/IFNA5/HLA-B/TPO/HLA-DQA2/CTLA4
PID_HEDGEHOG_GLI_PATHWAY	PID_HEDGEHOG_GLI_PATHWAY	47	-0.406892	-1.4827	0.0449827	0.156616	0.115914	8697	tags=45%, list=24%, signal=34%	SUFU/GNAI3/KIF3A/GSK3B/MTSS1/SMO/AKT1/SIN3A/CSNK1G1/GNG2/SHH/PIAS1/MAP2K1/FBXW11/CREBBP/CSNK1G3/PTCH1/CSNK1A1/RAB23/GLI2/GNAO1
KEGG_ALZHEIMERS_DISEASE	KEGG_ALZHEIMERS_DISEASE	159	0.353884	1.3245	0.0451306	0.156902	0.116126	9343	tags=44%, list=26%, signal=33%	COX8C/CALML5/NDUFA4L2/COX7B2/COX7A1/COX6C/BACE2/COX6B1/NDUFB9/NDUFA3/ATP5MC1/NDUFA7/NDUFB7/NDUFS6/CYC1/PSENEN/ATP5MC1P5/ATP5F1D/COX4I1/NDUFS5/NDUFA2/NDUFA1/UQCRB/COX4I2/NDUFS8/ATP5F1E/UQCRQ/GRIN2D/COX5B/UQCRH/GAPDH/ATP5MC2/NDUFB8/NDUFA8/UQCR10/PSEN2/NDUFV2/NDUFB3/CACNA1F/NDUFA6/GRIN1/COX6A1/APOE/COX7B/UQCR11/COX8A/ATP5PD/MAPK3/UQCRHL/NDUFB4/NDUFB10/NDUFB1/CALML6/COX7A2/COX5A/COX7C/NDUFS2/BAD/CACN…
REACTOME_UNWINDING_OF_DNA	REACTOME_UNWINDING_OF_DNA	12	0.658956	1.54496	0.0454545	0.157797	0.116788	10374	tags=75%, list=29%, signal=53%	CDC45/GINS2/GINS1/MCM5/MCM7/MCM2/MCM4/MCM6/MCM3
REACTOME_ASSEMBLY_OF_THE_HIV_VIRION	REACTOME_ASSEMBLY_OF_THE_HIV_VIRION	16	0.598756	1.49123	0.0456026	0.15808	0.116998	5448	tags=31%, list=15%, signal=27%	VPS28/UBA52/MVB12A/PPIA/RPS27A
REACTOME_CYCLIN_A_CDK2_ASSOCIATED_EVENTS_AT_S_PHASE_ENTRY	REACTOME_CYCLIN_A_CDK2_ASSOCIATED_EVENTS_AT_S_PHASE_ENTRY	85	0.405962	1.40409	0.0459318	0.158915	0.117616	10262	tags=44%, list=29%, signal=31%	PSMD4/PSMB4/CDC25A/CKS1B/PSMB3/SEM1/UBA52/LIN37/PSMB6/PSMB9/RPS27A/PSMB8/PSME2/PSMB1/CCNA1/E2F1/PSMD13/PSMB7/PSMC4/PSMC5/E2F5/PSMC3/E2F4/PSMD14/CDC25B/LIN9/CDK7/PSMA4/PSMB2/PSMB5/CCNA2/PSMA7/PSMD8/PSMA3/PSMA5/PSMA1/PSMA2
REACTOME_GAP_JUNCTION_ASSEMBLY	REACTOME_GAP_JUNCTION_ASSEMBLY	38	0.475409	1.44295	0.045977	0.158915	0.117616	6920	tags=45%, list=19%, signal=36%	TUBA3E/TUBA3C/GJB7/TUBB8/TUBAL3/TUBA4B/TUBA4A/GJB6/TUBB8B/GJD4/TUBB4B/TUBA3D/TUBB4A/GJC2/TUBA1C/TUBB2B/TUBA1A
WP_TGFBETA_RECEPTOR_SIGNALING	WP_TGFBETA_RECEPTOR_SIGNALING	55	-0.385047	-1.4436	0.0462633	0.159672	0.118176	5921	tags=38%, list=17%, signal=32%	TNF/BMP4/CTNNB1/SMAD7/ZFYVE9/ENG/NFKB1/CREBBP/SMAD6/LTBP1/SMAD9/EP300/JAK1/ZNF423/ZEB2/TGFBR2/TGFBR3/SMAD1/THBS1/FOS/INHBA
PID_GLYPICAN_1PATHWAY	PID_GLYPICAN_1PATHWAY	27	-0.467288	-1.49999	0.0466472	0.160764	0.118984	4766	tags=44%, list=13%, signal=39%	TGFB2/TGFBR1/YES1/TGFB3/APP/FYN/FLT1/SLIT2/FGF2/TGFBR2/NRG1/BLK
REACTOME_MEIOSIS	REACTOME_MEIOSIS	117	0.375987	1.35066	0.0474407	0.163262	0.120833	7256	tags=32%, list=20%, signal=26%	PRDM9/H3C7/H2AC20/H2BC10/H3C11/H3C14/H3C4/H2AC18/LMNA/FKBP6/H2BC9/SYCP1/H2AX/H3-4/SYCP2/H2BU1/MND1/H2AC14/H2AB1/SYCE1/BLM/H4C13/H4C11/H4C2/H2AC4/RAD51/ACD/H4C5/H2AJ/H4C4/H2AC7/H2AC19/H4C14/PSMC3IP/H4C15/H2AZ1/UBE2I/REC8
BIOCARTA_MCM_PATHWAY	BIOCARTA_MCM_PATHWAY	18	0.576816	1.47547	0.0478469	0.164422	0.121692	10374	tags=56%, list=29%, signal=39%	CDT1/ORC6/CDC6/MCM5/MCM7/ORC1/MCM2/MCM4/MCM6/MCM3
REACTOME_PIWI_INTERACTING_RNA_PIRNA_BIOGENESIS	REACTOME_PIWI_INTERACTING_RNA_PIRNA_BIOGENESIS	29	0.51284	1.45854	0.0483384	0.165871	0.122764	7036	tags=48%, list=20%, signal=39%	DDX4/TDRD1/FKBP6/POLR2J/MAEL/POLR2I/POLR2H/POLR2K/POLR2L/TDRKH/POLR2G/POLR2F/TDRD9/TDRD6
REACTOME_PEPTIDE_HORMONE_METABOLISM	REACTOME_PEPTIDE_HORMONE_METABOLISM	90	0.397948	1.38594	0.0486202	0.166199	0.123007	5118	tags=24%, list=14%, signal=21%	CGA/GCG/CDX2/INS/GIP/INHA/LEP/LHB/ISL1/GH1/MBOAT4/PLA2G7/FFAR1/STX1A/GNG13/PAX6/GNB3/SLC30A8/PCSK1/UCN/GZMH/KIF5A
KEGG_LEUKOCYTE_TRANSENDOTHELIAL_MIGRATION	KEGG_LEUKOCYTE_TRANSENDOTHELIAL_MIGRATION	115	-0.307958	-1.28867	0.0487805	0.166199	0.123007	6676	tags=30%, list=19%, signal=25%	PECAM1/ARHGAP35/PIK3CB/CLDN14/PRKCB/CTNNB1/AFDN/PRKCA/CLDN1/JAM2/MMP2/PIK3CA/PLCG2/PTPN11/ARHGAP5/PTK2B/CLDN19/TXK/CDH5/ROCK1/CTNND1/ITK/ITGB1/CLDN20/RAPGEF4/PIK3R1/CXCL12/OCLN/CLDN10/VCAM1/PIK3CG/MYL7/ITGA4/CLDN16/CTNNA3
REACTOME_FORMATION_OF_ATP_BY_CHEMIOSMOTIC_COUPLING	REACTOME_FORMATION_OF_ATP_BY_CHEMIOSMOTIC_COUPLING	16	0.595305	1.48264	0.0488599	0.166199	0.123007	6718	tags=50%, list=19%, signal=41%	ATP5MC1/ATP5MF/ATP5ME/ATP5F1D/ATP5F1E/ATP5MC2/ATP5PD/ATP5MG
REACTOME_ASYMMETRIC_LOCALIZATION_OF_PCP_PROTEINS	REACTOME_ASYMMETRIC_LOCALIZATION_OF_PCP_PROTEINS	64	0.428419	1.41326	0.048913	0.166199	0.123007	10262	tags=48%, list=29%, signal=35%	FZD2/PSMD4/PSMB4/PSMB3/SEM1/UBA52/PSMB6/PSMB9/RPS27A/PSMB8/PSME2/PSMB1/SCRIB/PSMD13/PSMB7/PSMC4/PSMC5/PSMC3/PSMD14/PARD6A/DVL2/PSMA4/PSMB2/PSMB5/PSMA7/PSMD8/PSMA3/PSMA5/PSMA1/PSMB11/PSMA2
BIOCARTA_EXTRINSIC_PATHWAY	BIOCARTA_EXTRINSIC_PATHWAY	13	-0.571999	-1.54095	0.0489691	0.166199	0.123007	10486	tags=77%, list=29%, signal=54%	SERPINC1/FGB/FGG/FGA/F7/F5/F2/F3/PROS1/F2R
REACTOME_REGULATION_OF_TLR_BY_ENDOGENOUS_LIGAND	REACTOME_REGULATION_OF_TLR_BY_ENDOGENOUS_LIGAND	19	0.56934	1.47248	0.0489731	0.166199	0.123007	1377	tags=26%, list=4%, signal=25%	S100A9/LY96/S100A1/S100A8/SFTPA1
WP_BILE_ACIDS_SYNTHESIS_AND_ENTEROHEPATIC_CIRCULATION	WP_BILE_ACIDS_SYNTHESIS_AND_ENTEROHEPATIC_CIRCULATION	12	-0.580956	-1.5393	0.0490196	0.166199	0.123007	3292	tags=58%, list=9%, signal=53%	CYP7A1/LDLR/ABCG5/ABCG8/SLC10A2/ABCB11/SLC10A1
REACTOME_POU5F1_OCT4_SOX2_NANOG_REPRESS_GENES_RELATED_TO_DIFFERENTIATION	REACTOME_POU5F1_OCT4_SOX2_NANOG_REPRESS_GENES_RELATED_TO_DIFFERENTIATION	10	0.67534	1.50601	0.0490694	0.166199	0.123007	2969	tags=40%, list=8%, signal=37%	CDX2/GSC/DKK1/SOX2
PID_IL27_PATHWAY	PID_IL27_PATHWAY	26	-0.464953	-1.48011	0.0491329	0.166199	0.123007	9424	tags=54%, list=26%, signal=40%	GATA3/STAT3/IL6/STAT1/STAT4/IL1B/STAT2/IL27/IL12B/TNF/JAK2/IL17A/JAK1/IL6ST
REACTOME_SIGNALING_BY_ERBB2_IN_CANCER	REACTOME_SIGNALING_BY_ERBB2_IN_CANCER	26	-0.465166	-1.48079	0.0491329	0.166199	0.123007	5364	tags=42%, list=15%, signal=36%	KRAS/ERBIN/SOS1/PIK3CA/NRG3/EREG/GAB1/EGFR/ERBB2/PIK3R1/NRG1
REACTOME_DEFENSINS	REACTOME_DEFENSINS	40	0.468813	1.44249	0.0495751	0.167457	0.123938	581	tags=10%, list=2%, signal=10%	PRSS2/DEFB126/DEFB133/DEFA5
BIOCARTA_CREB_PATHWAY	BIOCARTA_CREB_PATHWAY	22	-0.474241	-1.47576	0.0497238	0.167721	0.124133	8164	tags=59%, list=23%, signal=46%	PRKAR2A/CREB1/PRKACB/AKT1/MAPK1/PRKAR1A/PRKCB/PRKCA/SOS1/PIK3CA/RPS6KA5/PIK3R1/ADCY1
WP_MONOAMINE_TRANSPORT	WP_MONOAMINE_TRANSPORT	32	-0.436018	-1.45591	0.0498442	0.167889	0.124258	3111	tags=31%, list=9%, signal=29%	TH/TDO2/SLC6A4/SLC6A1/IL1R1/SLC6A2/ITGB3/RBL2/NOS1/DBH
PID_INTEGRIN2_PATHWAY	PID_INTEGRIN2_PATHWAY	28	-0.457715	-1.4839	0.0502959	0.169171	0.125206	3654	tags=36%, list=10%, signal=32%	C3/TGFBI/CD40LG/KNG1/ICAM3/GP1BA/PLAT/CCN1/VCAM1/ITGAD
REACTOME_EXTENSION_OF_TELOMERES	REACTOME_EXTENSION_OF_TELOMERES	51	0.445409	1.43154	0.0506156	0.170005	0.125824	10186	tags=47%, list=28%, signal=34%	PIF1/DSCC1/BLM/WRAP53/CHTF18/RUVBL2/ACD/RFC4/NOP10/POLD1/CCNA1/RUVBL1/GAR1/NHP2/DNA2/POLA2/RFC2/TERT/POLD2/CCNA2/LIG1/FEN1/RPA3/PCNA
REACTOME_ERBB2_REGULATES_CELL_MOTILITY	REACTOME_ERBB2_REGULATES_CELL_MOTILITY	15	-0.543172	-1.51647	0.0507614	0.170255	0.126009	5093	tags=40%, list=14%, signal=34%	DIAPH1/NRG3/EREG/EGFR/ERBB2/NRG1
KEGG_LIMONENE_AND_PINENE_DEGRADATION	KEGG_LIMONENE_AND_PINENE_DEGRADATION	10	-0.629098	-1.5551	0.0510949	0.171132	0.126658	8932	tags=70%, list=25%, signal=53%	ALDH9A1/HADHA/ALDH3A2/ALDH7A1/ALDH2/ALDH1B1/EHHADH
REACTOME_SIGNALING_BY_EGFR	REACTOME_SIGNALING_BY_EGFR	50	-0.401594	-1.45908	0.0514706	0.172148	0.12741	7368	tags=44%, list=21%, signal=35%	EPS15/STAM2/CBL/ADAM12/KRAS/SPRY2/ADAM10/LRIG1/ADAM17/PTPN3/SOS1/PTPRK/PIK3CA/PTPN11/SPRY1/AREG/EREG/GAB1/EGFR/TGFA/PIK3R1/SH3GL2
REACTOME_NICOTINATE_METABOLISM	REACTOME_NICOTINATE_METABOLISM	31	-0.442629	-1.4605	0.0518293	0.173104	0.128117	7432	tags=58%, list=21%, signal=46%	NMRK1/PARP16/PARP6/NAXD/PARP14/NMNAT1/PARP8/PARP4/PARP9/SLC22A13/NAMPT/NT5E/NADK2/NUDT12/NMNAT2/CYP8B1/PTGS2/PTGIS
WP_SPLICING_FACTOR_NOVA_REGULATED_SYNAPTIC_PROTEINS	WP_SPLICING_FACTOR_NOVA_REGULATED_SYNAPTIC_PROTEINS	42	-0.401653	-1.43891	0.0521173	0.173822	0.128649	6192	tags=50%, list=17%, signal=41%	PRKCZ/PLCB4/CASK/CLASP1/EPB41/CADM1/APLP2/KCNQ2/CDH2/ANK3/GRIN2B/CAV2/KCNJ6/MAPK4/NEO1/CADM3/KCNMA1/GPHN/DAB1/EPB41L1/GABBR2
WP_DISRUPTION_OF_POSTSYNAPTIC_SIGNALLING_BY_CNV	WP_DISRUPTION_OF_POSTSYNAPTIC_SIGNALLING_BY_CNV	33	-0.427885	-1.43985	0.052795	0.175714	0.130049	7552	tags=52%, list=21%, signal=41%	NLGN3/MAPK1/FMR1/SYNGAP1/DLG1/CYFIP1/NLGN4X/CAMK2D/TJP1/GRIN2B/SHANK1/NLGN1/CAMK2B/NRXN1/NRXN3/DLG2/GRIN2A
REACTOME_HIV_TRANSCRIPTION_ELONGATION	REACTOME_HIV_TRANSCRIPTION_ELONGATION	43	0.45468	1.41465	0.0528571	0.175714	0.130049	9943	tags=44%, list=28%, signal=32%	ELOB/POLR2J/ELOC/POLR2I/NELFE/POLR2H/POLR2K/POLR2L/GTF2H5/POLR2G/ELOA2/POLR2F/ERCC2/CDK7/NELFB/GTF2F2/NCBP2/SUPT5H/NELFCD
BIOCARTA_TCR_PATHWAY	BIOCARTA_TCR_PATHWAY	44	-0.398318	-1.43038	0.0529801	0.175714	0.130049	7481	tags=41%, list=21%, signal=32%	PLCG1/MAPK8/NFATC2/PPP3CA/MAP3K1/PRKCB/MAP2K1/PRKCA/CD3G/NFKB1/SOS1/PIK3CA/FYN/NFATC3/RASA1/PIK3R1/PIK3CG/FOS
REACTOME_SPHINGOLIPID_DE_NOVO_BIOSYNTHESIS	REACTOME_SPHINGOLIPID_DE_NOVO_BIOSYNTHESIS	44	-0.404064	-1.45101	0.0529801	0.175714	0.130049	5775	tags=55%, list=16%, signal=46%	ALDH3A2/SGPL1/CERS6/SAMD8/SPHK2/SPTLC2/SGPP1/PRKD3/OSBP/PRKD1/SGMS1/SPTLC1/PLPP1/DEGS2/PPM1L/SPTLC3/CERT1/SPTSSB/SGMS2/SGPP2/PLPP3/ACER2/ACER1/FA2H
REACTOME_NRAGE_SIGNALS_DEATH_THROUGH_JNK	REACTOME_NRAGE_SIGNALS_DEATH_THROUGH_JNK	59	-0.370531	-1.40028	0.0532319	0.176058	0.130303	8702	tags=53%, list=24%, signal=40%	PLEKHG5/MAPK8/ARHGEF40/FGD2/ARHGEF3/GNA13/MCF2L/ITSN1/ARHGEF15/PREX1/NET1/ARHGEF37/ARHGEF9/TRIO/ARHGEF17/SOS1/ARHGEF10/RASGRF2/ARHGEF18/ARHGEF6/AKAP13/BCL2L11/ABR/SOS2/NGFR/ARHGEF38/KALRN/ARHGEF12/ARHGEF26/TIAM1/FGD4
REACTOME_SIGNALING_BY_FGFR_IN_DISEASE	REACTOME_SIGNALING_BY_FGFR_IN_DISEASE	62	-0.356345	-1.36102	0.0532319	0.176058	0.130303	6477	tags=52%, list=18%, signal=42%	STAT3/NRAS/ZMYM2/FGF10/NCBP1/BAG4/POLR2C/PLCG1/STAT1/FGF1/KRAS/CNTRL/CUX1/STAT5B/POLR2B/FGFR2/FGF16/POLR2A/LRRFIP1/SOS1/ERLIN2/PIK3CA/FRS2/FGF18/GAB1/FGF2/FGF20/MYO18A/PIK3R1/FGF7/FGF23/FGF5
KEGG_SYSTEMIC_LUPUS_ERYTHEMATOSUS	KEGG_SYSTEMIC_LUPUS_ERYTHEMATOSUS	132	0.363673	1.33646	0.053528	0.176791	0.130846	9191	tags=46%, list=26%, signal=34%	ACTN2/H2BW1/H3C7/H2AC20/H2BC10/FCGR1A/H3C11/H3C14/H3C4/H2AC12/H2AC18/H2AW/SNRPB/H2BC9/H2AX/HLA-DMA/H3-4/H2BU1/H2AC14/H2AC21/FCGR2C/H2AB1/MACROH2A2/HLA-DRB1/SNRPD1/H4C13/H4C11/HLA-DQB1/C1QA/FCGR3B/C8G/H4C2/H2AC4/H2BW2/H4C5/HLA-DOB/H2AJ/H4C4/H2AC7/ACTN3/C1QB/HLA-DRB5/H2AC19/H4C14/HLA-DQA2/H4C15/H2AZ1/H2AC17/HLA-DPB1/SNRPD3/H4C1/H4C6/H2BC3/SSB/HLA-DQA1/MACROH2A1/H2BC14/H2BC17/FCGR3A/H2BC11/H2AC8
WP_PEPTIDE_GPCRS	WP_PEPTIDE_GPCRS	75	-0.341737	-1.33905	0.0541667	0.178652	0.132224	3107	tags=24%, list=9%, signal=22%	AGTR2/EDNRB/OXTR/GALR1/CCR6/CX3CR1/SSTR1/NPY1R/CCR8/AVPR1A/CCR4/GRPR/NPY4R/ATP8A1/BDKRB2/CXCR5/CCR9/NPY5R
REACTOME_PI_METABOLISM	REACTOME_PI_METABOLISM	84	-0.325601	-1.303	0.0546218	0.179904	0.13315	8884	tags=43%, list=25%, signal=32%	INPP5D/PIK3R3/MTMR1/PIK3R5/PLEKHA2/GDE1/PTEN/SACM1L/PI4KA/RAB14/PIP5K1B/PIK3CB/PLEKHA1/PIK3C3/PNPLA7/ENPP6/PLEKHA5/MTMR4/MTMR6/MTMR9/PI4K2B/MTMR10/MTMR12/PIK3CA/PIKFYVE/SYNJ1/PIK3R4/MTM1/PIK3C2A/SBF2/BMX/PIK3C2G/INPP4B/PIK3R1/PIK3CG/PTPN13
WP_GENE_REGULATORY_NETWORK_MODELLING_SOMITOGENESIS	WP_GENE_REGULATORY_NETWORK_MODELLING_SOMITOGENESIS	11	0.665735	1.51542	0.0547945	0.180223	0.133386	108	tags=18%, list=0%, signal=18%	WNT3A/RIPPLY2
PID_ALK1_PATHWAY	PID_ALK1_PATHWAY	26	-0.460229	-1.46508	0.0549133	0.180364	0.133491	8180	tags=54%, list=23%, signal=42%	ACVR2A/ACVR1/CAV1/SMAD4/MAPK1/TGFB3/SMAD7/ENG/SMAD9/BMPR2/TGFBR2/SMAD1/INHBA/GDF2
PID_ANTHRAX_PATHWAY	PID_ANTHRAX_PATHWAY	17	-0.530055	-1.50753	0.0555556	0.181471	0.13431	7910	tags=53%, list=22%, signal=41%	IL1B/MAPK1/MAP2K1/TNF/MAP2K6/ANTXR2/ANTXR1/PGR/VCAM1
REACTOME_STRIATED_MUSCLE_CONTRACTION	REACTOME_STRIATED_MUSCLE_CONTRACTION	35	0.483061	1.4422	0.0555556	0.181471	0.13431	4395	tags=34%, list=12%, signal=30%	TNNI2/TNNT2/TNNC1/ACTN2/MYL3/ACTA1/TPM2/TNNI3/TNNT1/MYH8/MYH6/MYBPC3
REACTOME_TRANSCRIPTIONAL_REGULATION_OF_GRANULOPOIESIS	REACTOME_TRANSCRIPTIONAL_REGULATION_OF_GRANULOPOIESIS	88	0.392063	1.36156	0.0555556	0.181471	0.13431	9246	tags=42%, list=26%, signal=31%	H3C7/H2AC20/H2BC10/H3C11/H3C14/H3C4/H2AC18/H2BC9/H2AX/H2BU1/H2AC14/H2AB1/H4C13/H4C11/H4C2/H2AC4/H4C5/H2AJ/H4C4/H2AC7/H2AC19/E2F1/CEBPB/CEBPA/H4C14/SPI1/H4C15/H2AZ1/CEBPE/H4C1/H4C6/H2BC3/H2BC14/H2BC17/H2BC11/H2AC8/CSF3R
WP_RETT_SYNDROME_CAUSING_GENES	WP_RETT_SYNDROME_CAUSING_GENES	48	-0.391106	-1.42867	0.0555556	0.181471	0.13431	6874	tags=48%, list=19%, signal=39%	SMARCA1/HIVEP2/SCN2A/SCN8A/SYNGAP1/STXBP1/KCNJ10/CECR2/SATB2/TBL1X/MEF2C/TRRAP/SHANK3/SMC1A/GRIN2B/TCF4/CDKL5/NCOR1/SMARCA2/SYNE2/GRIN2A/GABBR2/GNAO1
BIOCARTA_BCELLSURVIVAL_PATHWAY	BIOCARTA_BCELLSURVIVAL_PATHWAY	15	-0.541478	-1.51174	0.0558376	0.182039	0.13473	3844	tags=60%, list=11%, signal=54%	XIAP/CASP7/AKT1/PIK3CA/MTOR/ITGB1/PIK3R1/PIK3CG/FOS
REACTOME_NEGATIVE_REGULATION_OF_FGFR3_SIGNALING	REACTOME_NEGATIVE_REGULATION_OF_FGFR3_SIGNALING	29	-0.447303	-1.46344	0.0558824	0.182039	0.13473	7730	tags=48%, list=22%, signal=38%	BRAF/MAPK1/FGF1/CBL/SPRY2/PPP2CB/FGF16/PTPN11/FRS2/FGF18/FGF2/FGF20/FGF23/FGF5
WP_SREBF_AND_MIR33_IN_CHOLESTEROL_AND_LIPID_HOMEOSTASIS	WP_SREBF_AND_MIR33_IN_CHOLESTEROL_AND_LIPID_HOMEOSTASIS	18	-0.510317	-1.48973	0.056	0.182172	0.134829	7519	tags=61%, list=21%, signal=48%	FASN/SCD/HMGCR/PRKAA1/SIRT1/PPARGC1A/MTOR/ABCA1/LDLR/PPARA/HMGCS1
WP_MIRNA_TARGETS_IN_ECM_AND_MEMBRANE_RECEPTORS	WP_MIRNA_TARGETS_IN_ECM_AND_MEMBRANE_RECEPTORS	37	-0.41686	-1.44071	0.0561056	0.182267	0.134899	7864	tags=43%, list=22%, signal=34%	ITGA11/COL5A3/LAMB2/COL6A3/COL1A2/MIR219A1/COL4A2/FN1/COL5A1/ITGA1/COL4A1/COL3A1/MIR30C2/THBS2/THBS1/TNXB
PID_IL2_PI3K_PATHWAY	PID_IL2_PI3K_PATHWAY	34	-0.415644	-1.4148	0.05625	0.182486	0.135061	4678	tags=44%, list=13%, signal=38%	UGCG/RPS6KB1/AKT1/PRKCZ/SGMS1/NFKB1/EIF3A/SOS1/PIK3CA/PTPN11/MTOR/JAK1/BCL2/IL2RB/PIK3R1
REACTOME_RHO_GTPASES_ACTIVATE_NADPH_OXIDASES	REACTOME_RHO_GTPASES_ACTIVATE_NADPH_OXIDASES	24	0.533506	1.45715	0.0566616	0.183429	0.135759	9617	tags=58%, list=27%, signal=43%	S100A9/NOX3/S100A8/NOX1/CYBA/NCF2/NCF4/NCF1/NOXA1/MAPK3/RAC1/PRKCD/MAPK11/PIN1
REACTOME_MITOTIC_PROPHASE	REACTOME_MITOTIC_PROPHASE	141	0.355923	1.31983	0.0566948	0.183429	0.135759	9321	tags=38%, list=26%, signal=28%	H3C7/H2AC20/H2BC10/H3C11/H3C14/H3C4/H2AC18/LMNA/PLK1/H2BC9/H2AX/H3-4/CDK1/CCNB1/H2BU1/H2AC14/H2AB1/H4C13/NCAPH2/H4C11/ENSA/CCNB2/H4C2/H2AC4/BANF1/H4C5/H2AJ/H4C4/H2AC7/PPP2R1A/H2AC19/KMT5A/MAPK3/H4C14/NUP93/CTDNEP1/H4C15/H2AZ1/LEMD2/NUP62/H4C1/NUP210/H4C6/H2BC3/BLZF1/EMD/RAE1/NUP43/H2BC14/H2BC17/H2BC11/H2AC8/NUP37/NUP188
REACTOME_PERK_REGULATES_GENE_EXPRESSION	REACTOME_PERK_REGULATES_GENE_EXPRESSION	32	0.492203	1.43363	0.0572687	0.184508	0.136558	7945	tags=44%, list=22%, signal=34%	EXOSC4/DDIT3/EXOSC5/EXOSC1/ATF4/ASNS/CXCL8/EXOSC7/CEBPB/EXOSC3/EXOSC8/EIF2S2/EXOSC9/HSPA5
REACTOME_GP1B_IX_V_ACTIVATION_SIGNALLING	REACTOME_GP1B_IX_V_ACTIVATION_SIGNALLING	11	-0.606204	-1.55957	0.0574163	0.184508	0.136558	6186	tags=55%, list=17%, signal=45%	COL1A2/COL1A1/GP1BA/VWF/PIK3R1/GP5
REACTOME_SODIUM_CALCIUM_EXCHANGERS	REACTOME_SODIUM_CALCIUM_EXCHANGERS	11	-0.605826	-1.5586	0.0574163	0.184508	0.136558	4614	tags=55%, list=13%, signal=48%	SLC24A5/SLC8A1/SLC24A4/SLC8A3/SLC24A1/SLC24A3
WP_NAD_METABOLISM_SIRTUINS_AND_AGING	WP_NAD_METABOLISM_SIRTUINS_AND_AGING	11	-0.597596	-1.53742	0.0574163	0.184508	0.136558	9740	tags=82%, list=27%, signal=60%	FOXO3/SIRT3/TFAM/HIF1A/NFKB1/NAMPT/SIRT1/FOXO1/ROS1
WP_SEROTONIN_TRANSPORTER_ACTIVITY	WP_SEROTONIN_TRANSPORTER_ACTIVITY	11	-0.616298	-1.58554	0.0574163	0.184508	0.136558	5754	tags=55%, list=16%, signal=46%	PPP2CB/MAOA/SLC6A4/IL1R1/ITGB3/NOS1
REACTOME_SIGNALING_BY_PTK6	REACTOME_SIGNALING_BY_PTK6	54	-0.375976	-1.40813	0.057971	0.186039	0.137691	7589	tags=37%, list=21%, signal=29%	SOCS3/AKT1/HIF1A/CBL/ARHGAP35/KRAS/CCNE1/CDKN1B/DOCK1/CCND1/NR3C1/NRG3/EPAS1/EREG/SRMS/EGFR/RASA1/ERBB2/NRG1/LRRK2
KEGG_CELL_CYCLE	KEGG_CELL_CYCLE	124	0.361871	1.31531	0.0582404	0.186292	0.137878	10391	tags=44%, list=29%, signal=31%	SFN/CDKN1C/CDC20/PTTG1/ORC6/CDKN2A/CDC25A/PLK1/CDC45/PKMYT1/CDK1/CCNB1/E2F2/TTK/ANAPC11/CCNB2/CDC6/RBX1/BUB1B/CDKN2D/ANAPC7/CDC25C/MCM5/MCM7/PTTG2/CCNA1/E2F1/ORC1/MCM2/E2F5/BUB1/CHEK1/YWHAZ/E2F4/MAD2L2/CDC25B/MCM4/CDKN2C/MAD2L1/GADD45G/CDK7/CDC16/HDAC2/ZBTB17/CDC7/CCNA2/HDAC1/CHEK2/RBL1/MCM6/ESPL1/PCNA/MCM3/DBF4
REACTOME_BMAL1_CLOCK_NPAS2_ACTIVATES_CIRCADIAN_GENE_EXPRESSION	REACTOME_BMAL1_CLOCK_NPAS2_ACTIVATES_CIRCADIAN_GENE_EXPRESSION	27	-0.453564	-1.45593	0.058309	0.186292	0.137878	9868	tags=74%, list=28%, signal=54%	ARNTL2/NCOA6/RXRA/CARM1/F7/KLF15/BHLHE40/NCOA2/MED1/NCOA1/ARNTL/HELZ2/BHLHE41/TBL1X/CREBBP/NAMPT/CLOCK/PPARA/CHD9/NOCT
REACTOME_EFFECTS_OF_PIP2_HYDROLYSIS	REACTOME_EFFECTS_OF_PIP2_HYDROLYSIS	27	-0.45007	-1.44472	0.058309	0.186292	0.137878	6886	tags=59%, list=19%, signal=48%	TRPC7/DGKA/MGLL/ITPR3/PRKCQ/DGKH/ABHD6/DGKE/TRPC6/RASGRP2/TRPC3/PRKCE/PRKCH/RASGRP1/ITPR2/ITPR1
WP_TRANSSULFURATION_PATHWAY	WP_TRANSSULFURATION_PATHWAY	10	-0.619573	-1.53155	0.0583942	0.186292	0.137878	5475	tags=50%, list=15%, signal=42%	MTR/MAT2B/CTH/CSAD/CBS
WP_CIRCADIAN_RHYTHM_RELATED_GENES	WP_CIRCADIAN_RHYTHM_RELATED_GENES	200	-0.264348	-1.22598	0.0584416	0.186292	0.137878	6173	tags=31%, list=17%, signal=26%	DYRK1A/ATOH7/PROKR2/PRKAA1/GNAQ/FBXW11/TOP1/CRY2/ID2/UTS2R/KMT2A/ARNTL/NTRK3/BHLHE41/FBXL3/PER2/UBE3A/NR1D2/NAMPT/AHR/SIRT1/KDM5A/PROX1/RORB/GHRH/PPARGC1A/ID4/EP300/PHLPP1/CLOCK/EGR1/TH/PER3/NCOR1/PPARA/NGFR/SLC6A4/CIPC/NLGN1/HTR7/MAGEL2/KLF10/KCNMA1/USP2/NOCT/RORA/KLF9/HS3ST2/MTTP/NRIP1/LGR4/NKX2-1/CPT1A/FAS/NOS2/SIK1/ADCY1/ADIPOQ/DRD1/EGR3/KCND2/PROK1
REACTOME_GLUCAGON_TYPE_LIGAND_RECEPTORS	REACTOME_GLUCAGON_TYPE_LIGAND_RECEPTORS	33	0.481108	1.40918	0.0588235	0.187259	0.138594	4651	tags=33%, list=13%, signal=29%	GCG/GIP/GNG4/GNG8/GHRHR/GNGT1/GIPR/GNG13/VIP/GNB3/SCT
REACTOME_THE_ACTIVATION_OF_ARYLSULFATASES	REACTOME_THE_ACTIVATION_OF_ARYLSULFATASES	13	-0.566447	-1.52599	0.0592784	0.188454	0.139478	6137	tags=69%, list=17%, signal=57%	ARSF/ARSA/SUMF2/ARSG/ARSK/ARSJ/ARSD/ARSH/STS
BIOCARTA_IL2RB_PATHWAY	BIOCARTA_IL2RB_PATHWAY	37	-0.40769	-1.40902	0.0594059	0.188608	0.139592	8205	tags=49%, list=23%, signal=38%	RPS6KB1/SOCS3/CFLAR/AKT1/MAPK1/IKZF3/CBL/STAT5B/SOS1/PIK3CA/JAK1/BCL2/IRS1/IL2RB/FAS/PIK3R1/PIK3CG/FOS
REACTOME_PCP_CE_PATHWAY	REACTOME_PCP_CE_PATHWAY	92	0.391919	1.37254	0.0595855	0.18861	0.139594	10262	tags=47%, list=29%, signal=33%	FZD2/PSMD4/PRKCG/PSMB4/PSMB3/CLTB/CLTA/SEM1/ROR2/AP2S1/UBA52/PSMB6/PSMB9/PFN1/RPS27A/PSMB8/PSME2/PSMB1/SCRIB/PSMD13/PSMB7/PSMC4/PSMC5/PSMC3/PSMD14/PARD6A/WNT4/RAC1/DVL2/PSMA4/PSMB2/PSMB5/FZD6/DVL1/PSMA7/PSMD8/PSMA3/AP2M1/PSMA5/RAC3/PSMA1/PSMB11/PSMA2
REACTOME_INTERLEUKIN_2_FAMILY_SIGNALING	REACTOME_INTERLEUKIN_2_FAMILY_SIGNALING	44	-0.39287	-1.41081	0.0596026	0.18861	0.139594	4187	tags=27%, list=12%, signal=24%	SOS1/IL5RA/JAK2/PIK3CA/PTK2B/JAK1/CSF2RB/IL9R/SOS2/IL2RB/PIK3R1/IL21
REACTOME_TNFR2_NON_CANONICAL_NF_KB_PATHWAY	REACTOME_TNFR2_NON_CANONICAL_NF_KB_PATHWAY	100	0.3795	1.33677	0.0596447	0.18861	0.139594	10262	tags=46%, list=29%, signal=33%	TNFRSF18/TNFSF9/PSMD4/PSMB4/TNFSF4/CD70/TNFSF14/PSMB3/TNFRSF4/TRAF2/SEM1/UBE2M/RELB/TNFRSF17/UBA52/LTB/TNFSF12/NFKB2/PSMB6/TNFRSF25/PSMB9/RPS27A/PSMB8/PSME2/PSMB1/EDARADD/PSMD13/PSMB7/PSMC4/PSMC5/PSMC3/PSMD14/TNFRSF12A/TNFRSF13B/PSMA4/PSMB2/PSMB5/PSMA7/PSMD8/PSMA3/PSMA5/TNFRSF8/PSMA1/PSMB11/TNFRSF14/PSMA2
REACTOME_MEIOTIC_SYNAPSIS	REACTOME_MEIOTIC_SYNAPSIS	79	0.396862	1.35787	0.0606061	0.190789	0.141207	9191	tags=46%, list=26%, signal=34%	H2AC20/H2BC10/H2AC18/LMNA/FKBP6/H2BC9/SYCP1/H2AX/H3-4/SYCP2/H2BU1/H2AC14/H2AB1/SYCE1/H4C13/H4C11/H4C2/H2AC4/ACD/H4C5/H2AJ/H4C4/H2AC7/H2AC19/H4C14/H4C15/H2AZ1/UBE2I/REC8/H4C1/H4C6/H2BC3/H2BC14/H2BC17/H2BC11/H2AC8
REACTOME_AMYLOID_FIBER_FORMATION	REACTOME_AMYLOID_FIBER_FORMATION	107	0.374079	1.32685	0.0607595	0.190789	0.141207	6004	tags=27%, list=17%, signal=23%	CALCA/PRL/INS/H3C7/H2AC20/H2BC10/H3C11/H3C14/H3C4/H2AC18/H2BC9/H2AX/PSENEN/H2BU1/H2AC14/H2AB1/H4C13/CST3/H4C11/LYZ/H4C2/UBA52/H2AC4/H4C5/H4C4/H2AC7/RPS27A/H2AC19/APCS
WP_IL5_SIGNALING_PATHWAY	WP_IL5_SIGNALING_PATHWAY	40	-0.396992	-1.40141	0.0608108	0.190789	0.141207	8411	tags=48%, list=23%, signal=36%	STAT1/GSK3B/RPS6KB1/SPRED1/AKT1/MAPK1/KRAS/MAP2K1/STAT5B/SOS1/IL5RA/JAK2/PTPN11/JAK1/CSF2RB/BCL2/PIK3R1/PIK3CG/FOS
WP_NEURAL_CREST_CELL_MIGRATION_DURING_DEVELOPMENT	WP_NEURAL_CREST_CELL_MIGRATION_DURING_DEVELOPMENT	40	-0.396371	-1.39921	0.0608108	0.190789	0.141207	5291	tags=32%, list=15%, signal=28%	EPHB1/TRIO/MMP2/AKT3/PIK3CA/PIK3R4/NGFR/CDH11/BDNF/PAK5/TIAM1/PIK3CG/FOS
PID_LYSOPHOSPHOLIPID_PATHWAY	PID_LYSOPHOSPHOLIPID_PATHWAY	65	-0.357415	-1.38139	0.0608365	0.190789	0.141207	8638	tags=45%, list=24%, signal=34%	ADCY5/GNAI3/PLCG1/GSK3B/AKT1/GNA13/ADCY4/ADCY6/GNG2/PIK3CB/ADCY3/GNAQ/PRKD1/NFKB1/MMP2/ADCY7/ADCY9/PTK2B/PRKCE/LPAR4/GAB1/EGFR/TIAM1/PIK3R1/GNA14/ADRA1B/FOS/ADCY1/GNAO1
BIOCARTA_TEL_PATHWAY	BIOCARTA_TEL_PATHWAY	17	-0.521996	-1.48461	0.0608466	0.190789	0.141207	7589	tags=47%, list=21%, signal=37%	AKT1/KRAS/TEP1/RB1/PRKCA/TNKS/BCL2/EGFR
REACTOME_SYNTHESIS_OF_BILE_ACIDS_AND_BILE_SALTS_VIA_27_HYDROXYCHOLESTEROL	REACTOME_SYNTHESIS_OF_BILE_ACIDS_AND_BILE_SALTS_VIA_27_HYDROXYCHOLESTEROL	15	-0.536198	-1.497	0.0609137	0.190789	0.141207	7193	tags=53%, list=20%, signal=43%	NCOA2/NR1H4/NCOA1/CYP7B1/CYP7A1/CYP8B1/PTGIS/AKR1D1
REACTOME_RUNX2_REGULATES_BONE_DEVELOPMENT	REACTOME_RUNX2_REGULATES_BONE_DEVELOPMENT	31	-0.436311	-1.43965	0.0609756	0.190789	0.141207	7590	tags=55%, list=21%, signal=43%	YES1/SMAD4/MAPK1/RUNX2/HEY2/SATB2/MAF/RB1/UCMA/COL1A1/SMAD6/YAP1/HDAC6/ZNF521/GLI2/SMAD1/AR
REACTOME_PECAM1_INTERACTIONS	REACTOME_PECAM1_INTERACTIONS	12	-0.5633	-1.49252	0.0612745	0.191473	0.141712	8884	tags=75%, list=25%, signal=56%	LCK/INPP5D/PLCG1/YES1/ITGAV/PECAM1/PTPN11/FYN/ITGB3
BIOCARTA_AGR_PATHWAY	BIOCARTA_AGR_PATHWAY	33	-0.418385	-1.40789	0.0621118	0.193452	0.143177	3770	tags=30%, list=11%, signal=27%	ARHGEF6/NRG3/PAK5/EGFR/ITGB1/LAMA3/MUSK/NRG1/DMD/LAMA2
BIOCARTA_VITCB_PATHWAY	BIOCARTA_VITCB_PATHWAY	11	-0.582051	-1.49743	0.062201	0.193452	0.143177	4857	tags=64%, list=14%, signal=55%	COL4A2/COL4A6/SLC23A1/COL4A1/SLC23A2/COL4A3/COL4A4
REACTOME_BETA_OXIDATION_OF_VERY_LONG_CHAIN_FATTY_ACIDS	REACTOME_BETA_OXIDATION_OF_VERY_LONG_CHAIN_FATTY_ACIDS	11	-0.594758	-1.53012	0.062201	0.193452	0.143177	4648	tags=55%, list=13%, signal=47%	ACOT6/HSD17B4/MLYCD/ACAA1/ACOX1/EHHADH
PID_IL12_STAT4_PATHWAY	PID_IL12_STAT4_PATHWAY	32	-0.414848	-1.38522	0.0623053	0.193452	0.143177	4667	tags=34%, list=13%, signal=30%	STAT3/MAPK8/STAT4/PPP3CA/CD3G/CREBBP/CD4/CD28/IL13/IL18R1/FOS
REACTOME_TRANSCRIPTIONAL_REGULATION_OF_PLURIPOTENT_STEM_CELLS	REACTOME_TRANSCRIPTIONAL_REGULATION_OF_PLURIPOTENT_STEM_CELLS	31	0.487153	1.41113	0.0623145	0.193452	0.143177	4943	tags=32%, list=14%, signal=28%	CDX2/NR5A1/GSC/DKK1/ZSCAN10/FOXD3/SOX2/SALL4/NR6A1/ZIC3
KEGG_PORPHYRIN_AND_CHLOROPHYLL_METABOLISM	KEGG_PORPHYRIN_AND_CHLOROPHYLL_METABOLISM	41	-0.39544	-1.40533	0.0627063	0.194414	0.143889	2026	tags=24%, list=6%, signal=23%	UGT2B15/UGT2B7/ALAD/CP/UGT1A1/UGT2B10/UGT2A3/UGT1A4/UGT1A3/UGT2B17
WP_CELL_CYCLE	WP_CELL_CYCLE	120	0.362576	1.30514	0.0630517	0.19523	0.144493	10391	tags=43%, list=29%, signal=31%	SFN/CDKN1C/CDC20/PTTG1/ORC6/CDKN2A/CDC25A/PLK1/CDC45/PKMYT1/CDK1/CCNB1/E2F2/TTK/ANAPC11/CCNB2/CDC6/RBX1/CDKN2D/ANAPC7/CDC25C/MCM5/MCM7/PTTG2/CCNA1/E2F1/ORC1/MCM2/E2F5/BUB1/CHEK1/YWHAZ/E2F4/MAD2L2/CDC25B/MCM4/CDKN2C/GADD45G/CDK7/CDC16/HDAC2/ZBTB17/CDC7/CCNA2/HDAC1/CHEK2/RBL1/MCM6/ESPL1/PCNA/MCM3/DBF4
REACTOME_TRNA_AMINOACYLATION	REACTOME_TRNA_AMINOACYLATION	42	0.448501	1.38515	0.0633094	0.195773	0.144895	13817	tags=60%, list=39%, signal=37%	EEF1E1/GARS1/FARSB/CARS2/YARS1/SARS2/AARS1/FARSA/KARS1/VARS1/HARS1/QARS1/MARS1/TARS2/EPRS1/TARS1/PPA1/CARS1/AIMP1/RARS1/HARS2/DARS2/SARS1/WARS1/LARS1
REACTOME_HYALURONAN_METABOLISM	REACTOME_HYALURONAN_METABOLISM	17	-0.508639	-1.44662	0.0634921	0.195964	0.145037	9388	tags=53%, list=26%, signal=39%	HAS2/CEMIP/HYAL3/HAS3/HYAL1/CHP1/HAS1/LYVE1/STAB2
PID_NFKAPPAB_CANONICAL_PATHWAY	PID_NFKAPPAB_CANONICAL_PATHWAY	22	-0.460549	-1.43315	0.0635359	0.195964	0.145037	9756	tags=64%, list=27%, signal=46%	TNFRSF1A/XPO1/MALT1/UBE2D3/CHUK/BIRC2/TNF/TNFAIP3/TRAF6/CYLD/PRKCA/NFKB1/ATM/ERC1
REACTOME_CLATHRIN_MEDIATED_ENDOCYTOSIS	REACTOME_CLATHRIN_MEDIATED_ENDOCYTOSIS	145	-0.283489	-1.22035	0.0639535	0.196648	0.145543	7017	tags=29%, list=20%, signal=23%	SNX18/CBL/ITSN1/NECAP1/ACTR2/GRK3/UBQLN2/ITSN2/SYT11/SYT1/DNAJC6/FNBP1L/ADRB2/AVPR2/ARRB1/SCARB2/CD3G/HIP1/CD4/TGOLN2/WASL/TF/FCHO2/REPS2/M6PR/SGIP1/AREG/FZD4/LDLR/SYNJ1/EREG/APOB/PIK3C2A/EGFR/TGFA/IL7R/STON1/SYT2/SH3GL2/CHRM2/SYT9/CFTR
WP_IL1_SIGNALING_PATHWAY	WP_IL1_SIGNALING_PATHWAY	55	-0.373374	-1.39984	0.0640569	0.196648	0.145543	8898	tags=51%, list=25%, signal=38%	IRAK2/PLCG1/MAPK8/CHUK/IL1B/IRAK3/AKT1/MAPK1/UBE2V1/MAP3K1/PRKCZ/MAP3K3/MAP2K1/MAP3K2/TRAF6/MAP3K14/MYD88/NFKB1/IL1RAP/MAP2K6/TAB2/PELI2/TAB3/PTPN11/CCL2/REL/IL1R1/PIK3R1
REACTOME_OXIDATIVE_STRESS_INDUCED_SENESCENCE	REACTOME_OXIDATIVE_STRESS_INDUCED_SENESCENCE	122	0.36293	1.30903	0.0640704	0.196648	0.145543	10169	tags=43%, list=28%, signal=31%	H3C7/CBX2/H2AC20/H2BC10/H3C11/H3C14/H3C4/H2AC18/CDKN2A/H2BC9/H2AX/H2BU1/E2F2/H2AC14/TXN/H2AB1/H4C13/H4C11/MAPKAPK2/H4C2/UBA52/H2AC4/H4C5/CDKN2D/H2AJ/H4C4/H2AC7/RPS27A/IFNB1/H2AC19/E2F1/MAPK3/H4C14/H4C15/CBX8/H2AZ1/EZH2/CDKN2C/MDM4/H4C1/H4C6/H2BC3/CBX4/H2BC14/H2BC17/H2BC11/H2AC8/MAPK11/H3-3A/EED/RNF2/MAPK10
REACTOME_PENTOSE_PHOSPHATE_PATHWAY	REACTOME_PENTOSE_PHOSPHATE_PATHWAY	15	0.598447	1.46772	0.0641447	0.196648	0.145543	5892	tags=47%, list=16%, signal=39%	PRPS1L1/G6PD/TKT/PGLS/TALDO1/RPIA/PGD
REACTOME_CHONDROITIN_SULFATE_BIOSYNTHESIS	REACTOME_CHONDROITIN_SULFATE_BIOSYNTHESIS	20	-0.488397	-1.47606	0.0641711	0.196648	0.145543	6980	tags=50%, list=19%, signal=40%	CHST7/BGN/CHSY1/CSGALNACT2/CHSY3/NCAN/VCAN/CHST9/CSGALNACT1/DCN
REACTOME_INTERACTION_WITH_CUMULUS_CELLS_AND_THE_ZONA_PELLUCIDA	REACTOME_INTERACTION_WITH_CUMULUS_CELLS_AND_THE_ZONA_PELLUCIDA	11	0.644378	1.4668	0.0650685	0.198739	0.14709	2628	tags=45%, list=7%, signal=42%	ZP1/ZP3/ADAM2/ADAM30/SPAM1
WP_COMPUTATIONAL_MODEL_OF_AEROBIC_GLYCOLYSIS	WP_COMPUTATIONAL_MODEL_OF_AEROBIC_GLYCOLYSIS	11	0.64539	1.46911	0.0650685	0.198739	0.14709	4601	tags=45%, list=13%, signal=40%	SLC2A1/ALDOA/PKM/ENO1/GAPDH
BIOCARTA_ACH_PATHWAY	BIOCARTA_ACH_PATHWAY	14	-0.54107	-1.46042	0.0651042	0.198739	0.14709	3844	tags=36%, list=11%, signal=32%	PIK3CA/PTK2B/PIK3R1/MUSK/PIK3CG
REACTOME_UREA_CYCLE	REACTOME_UREA_CYCLE	10	-0.614759	-1.51966	0.0656934	0.200281	0.148231	7378	tags=70%, list=21%, signal=56%	ARG2/ASL/ARG1/ASS1/CPS1/SLC25A15/OTC
REACTOME_RESPONSE_OF_EIF2AK1_HRI_TO_HEME_DEFICIENCY	REACTOME_RESPONSE_OF_EIF2AK1_HRI_TO_HEME_DEFICIENCY	15	0.594949	1.45914	0.0657895	0.200317	0.148258	7244	tags=47%, list=20%, signal=37%	DDIT3/TRIB3/ATF5/ATF4/ASNS/CEBPB/EIF2S2
PID_IL23_PATHWAY	PID_IL23_PATHWAY	37	-0.401507	-1.38765	0.0660066	0.200721	0.148557	8411	tags=57%, list=23%, signal=43%	STAT3/IL6/STAT1/STAT4/SOCS3/IL1B/IL23A/IL12B/TNF/CXCL9/NFKB1/CD4/JAK2/PIK3CA/MPO/IL23R/IL17A/CCL2/IL18R1/PIK3R1/NOS2
PID_GMCSF_PATHWAY	PID_GMCSF_PATHWAY	36	-0.406155	-1.39481	0.0662252	0.201128	0.148859	9326	tags=50%, list=26%, signal=37%	STAT3/NRAS/STAT1/PRKACB/MAPK1/IRF8/KRAS/MAP2K1/STAT5B/SOS1/JAK2/PIK3CA/PTPN11/CSF2RB/CISH/CCL2/PIK3R1/FOS
REACTOME_PKA_MEDIATED_PHOSPHORYLATION_OF_CREB	REACTOME_PKA_MEDIATED_PHOSPHORYLATION_OF_CREB	20	-0.483882	-1.46242	0.0668449	0.202752	0.15006	8638	tags=60%, list=24%, signal=46%	ADCY5/PRKAR2A/CREB1/PRKACB/ADCY4/ADCY6/PRKAR1A/ADCY3/ADCY7/ADCY9/NBEA/ADCY1
NABA_SECRETED_FACTORS	NABA_SECRETED_FACTORS	340	0.309405	1.22511	0.067033	0.202872	0.150149	2856	tags=18%, list=8%, signal=16%	WNT3A/BMP7/ISM2/PRL/CCL26/INS/S100P/EPO/CXCL5/S100A7/INSL6/S100A9/S100A2/IFNE/INHA/FGF19/WNT6/CXCL1/S100A1/IL37/FGF21/S100A8/WIF1/LEP/TNFSF9/CCL1/IL11/IL4/IL36RN/IL17F/S100A6/S100A14/ARTN/C1QTNF9B/GH1/S100A13/BRINP3/MDK/CCL20/XCL1/LEFTY1/IL17B/S100A11/PF4V1/S100A16/S100A3/S100A4/ANGPTL5/CHRDL2/CCL3L3/TNFSF4/CCL13/GDF15/CCL7/TNFSF14/CCL19/FST/CRNN/LEFTY2/S100A5
REACTOME_INTEGRIN_SIGNALING	REACTOME_INTEGRIN_SIGNALING	27	-0.438609	-1.40793	0.0670554	0.202872	0.150149	5356	tags=56%, list=15%, signal=47%	CRK/FGB/RAP1A/FGG/FGA/AKT1/RAP1B/RASGRP2/FN1/SOS1/PDPK1/RASGRP1/VWF/RAPGEF4/ITGB3
REACTOME_HDACS_DEACETYLATE_HISTONES	REACTOME_HDACS_DEACETYLATE_HISTONES	91	0.383426	1.34165	0.0677083	0.204456	0.151321	9202	tags=44%, list=26%, signal=33%	H3C7/H2AC20/H2BC10/H3C11/H3C14/H3C4/H2AC12/H2AC18/H2AW/H2BC9/HDAC10/H2BU1/H2AC14/H2AC21/BRMS1/H4C13/H4C11/H4C2/H2AC4/H4C5/H4C4/GPS2/H2AC7/H2AC19/MBD3/SAP30/H4C14/H4C15/H2AC17/H4C1/H4C6/H2BC3/MTA3/HDAC2/SAP18/H2BC14/H2BC17/H2BC11/H2AC8/HDAC1
WP_HOSTPATHOGEN_INTERACTION_OF_HUMAN_CORONA_VIRUSES_AUTOPHAGY	WP_HOSTPATHOGEN_INTERACTION_OF_HUMAN_CORONA_VIRUSES_AUTOPHAGY	19	-0.49199	-1.46019	0.0677507	0.204456	0.151321	9862	tags=47%, list=28%, signal=34%	RB1CC1/ATG4A/WIPI1/ULK2/PIK3C3/BECN1/ZFYVE1/MTOR/PIK3R4
PID_FOXO_PATHWAY	PID_FOXO_PATHWAY	49	-0.381678	-1.38462	0.0678571	0.204517	0.151367	8467	tags=47%, list=24%, signal=36%	MAPK8/CHUK/RALB/ZFAND5/AKT1/YWHAQ/CSNK1G1/SGK1/FOXO4/CDKN1B/CTNNB1/CREBBP/SIRT1/CSNK1G3/EP300/BCL2L11/CSNK1A1/FOXO1/GADD45A/KAT2B/G6PC/CAT/RBL2
SIG_BCR_SIGNALING_PATHWAY	SIG_BCR_SIGNALING_PATHWAY	46	-0.380272	-1.37935	0.0680272	0.204561	0.151399	7624	tags=46%, list=21%, signal=36%	CD22/INPP5D/GSK3B/BLNK/AKT1/NFATC2/MAPK1/ITPR3/PPP3CA/PPP1R13B/AKT3/SOS1/PIK3CA/PLCG2/PDPK1/BCL2/SOS2/ITPR2/ITPR1/PIK3R1/PTPRC
REACTOME_PTEN_REGULATION	REACTOME_PTEN_REGULATION	139	0.349275	1.29137	0.0680437	0.204561	0.151399	10262	tags=39%, list=29%, signal=28%	CBX2/LAMTOR2/PSMD4/PSMB4/PSMB3/MAF1/SALL4/NR2E1/CSNK2B/SEM1/LAMTOR4/UBA52/PSMB6/RRAGD/PSMB9/RPS27A/PSMB8/PSME2/PSMB1/MBD3/PSMD13/LAMTOR5/PSMB7/MLST8/PSMC4/MAPK3/PSMC5/PSMC3/CBX8/PSMD14/EZH2/TRIM27/MTA3/PSMA4/LAMTOR1/RRAGC/PSMB2/CBX4/HDAC2/PSMB5/HDAC1/PSMA7/PSMD8/PSMA3/PSMA5/OTUD3/AGO2/KDM1A/EED/PSMA1/RNF2/PSMB11/PPARG/PSMA2
REACTOME_ATF4_ACTIVATES_GENES_IN_RESPONSE_TO_ENDOPLASMIC_RETICULUM_STRESS	REACTOME_ATF4_ACTIVATES_GENES_IN_RESPONSE_TO_ENDOPLASMIC_RETICULUM_STRESS	27	0.50309	1.41073	0.0682853	0.204867	0.151626	7703	tags=44%, list=22%, signal=35%	EXOSC4/DDIT3/EXOSC5/EXOSC1/ATF4/ASNS/CXCL8/EXOSC7/CEBPB/EXOSC3/EXOSC8/EXOSC9
REACTOME_MRNA_DECAY_BY_3_TO_5_EXORIBONUCLEASE	REACTOME_MRNA_DECAY_BY_3_TO_5_EXORIBONUCLEASE	16	0.570061	1.41977	0.0684039	0.204867	0.151626	9185	tags=62%, list=26%, signal=46%	EXOSC4/EXOSC5/EXOSC1/NT5C3B/EXOSC7/EXOSC3/DCPS/EXOSC8/EXOSC9/EXOSC2
REACTOME_WNT5A_DEPENDENT_INTERNALIZATION_OF_FZD2_FZD5_AND_ROR2	REACTOME_WNT5A_DEPENDENT_INTERNALIZATION_OF_FZD2_FZD5_AND_ROR2	13	0.615733	1.48702	0.0684039	0.204867	0.151626	3895	tags=38%, list=11%, signal=34%	FZD2/CLTB/CLTA/ROR2/AP2S1
REACTOME_RNA_POLYMERASE_I_TRANSCRIPTION_INITIATION	REACTOME_RNA_POLYMERASE_I_TRANSCRIPTION_INITIATION	47	0.440702	1.38486	0.0687237	0.205257	0.151914	11033	tags=45%, list=31%, signal=31%	CD3EAP/ZNRD1/KAT2A/POLR2H/POLR2K/POLR2L/POLR1C/GTF2H5/MBD3/EHMT2/POLR2F/ERCC2/TAF1D/CDK7/MTA3/HDAC2/HDAC1/TAF1A/POLR1D/POLR2E/POLR1E
WP_SUDDEN_INFANT_DEATH_SYNDROME_SIDS_SUSCEPTIBILITY_PATHWAYS	WP_SUDDEN_INFANT_DEATH_SYNDROME_SIDS_SUSCEPTIBILITY_PATHWAYS	159	-0.273457	-1.2003	0.06875	0.205257	0.151914	5921	tags=31%, list=17%, signal=26%	TNF/ADCYAP1R1/THRB/CTNNB1/ECE1/TLX3/REST/MEF2C/NFKB1/CREBBP/MAOA/SPTBN1/FMO3/TF/HADHB/TSPYL1/C4A/C4B/PPARGC1A/EP300/ATP1A3/NR3C1/PBX1/KCNQ1/CHRFAM7A/EGR1/IL10/PLP1/TPPP/TH/KCNJ8/SLC6A4/CHRNA7/BDNF/PAH/RET/IL13/RORA/G6PC/SCN4B/SSTR1/CPT1A/AR/ACADM/CHRNA4/NTRK2/VIPR1/ASCL1/AQP4/CHRM2
REACTOME_INSULIN_RECEPTOR_SIGNALLING_CASCADE	REACTOME_INSULIN_RECEPTOR_SIGNALLING_CASCADE	54	-0.370423	-1.38733	0.0688406	0.205257	0.151914	7632	tags=52%, list=21%, signal=41%	GRB10/MAPK1/FGF1/INSR/PIK3CB/KRAS/PIK3C3/FGFR2/FGF16/IRS2/FLT3/SOS1/PIK3CA/PTPN11/PDPK1/FRS2/IRS1/FGF18/PIK3R4/GAB1/FGF2/PDE3B/FGF20/PIK3R1/FGF7/FGF23/KL/FGF5
REACTOME_RESOLUTION_OF_AP_SITES_VIA_THE_MULTIPLE_NUCLEOTIDE_PATCH_REPLACEMENT_PATHWAY	REACTOME_RESOLUTION_OF_AP_SITES_VIA_THE_MULTIPLE_NUCLEOTIDE_PATCH_REPLACEMENT_PATHWAY	24	0.522707	1.42766	0.0689127	0.205257	0.151914	10186	tags=50%, list=28%, signal=36%	RFC4/POLD1/POLE4/RFC2/POLE2/POLB/PARP1/POLD2/LIG1/FEN1/RPA3/PCNA
REACTOME_HSF1_DEPENDENT_TRANSACTIVATION	REACTOME_HSF1_DEPENDENT_TRANSACTIVATION	38	0.4596	1.39497	0.0689655	0.205257	0.151914	8523	tags=50%, list=24%, signal=38%	CRYAB/HSPB1/HSPA6/HSPA1A/HSPA1B/HSF1/CRYBA4/RLN1/SERPINH1/HSPB8/MRPL18/MLST8/GML/AKT1S1/FKBP4/DNAJB1/HSPH1/HSPB2/HSBP1
PID_PDGFRA_PATHWAY	PID_PDGFRA_PATHWAY	22	-0.455144	-1.41633	0.0690608	0.205283	0.151934	8570	tags=41%, list=24%, signal=31%	PLCG1/CAV1/ITGAV/RAPGEF1/SOS1/PIK3CA/JAK1/PIK3R1/FOS
PID_P38_MKK3_6PATHWAY	PID_P38_MKK3_6PATHWAY	26	-0.44305	-1.41039	0.0693642	0.205928	0.152411	6350	tags=46%, list=18%, signal=38%	TAOK1/MAP3K1/MAP3K3/TRAF6/GADD45B/TAOK3/MAP2K6/TAB2/ATM/GADD45A/MAP3K5/CAMK2B
REACTOME_NUCLEAR_RECEPTOR_TRANSCRIPTION_PATHWAY	REACTOME_NUCLEAR_RECEPTOR_TRANSCRIPTION_PATHWAY	53	-0.375468	-1.38693	0.0698529	0.20712	0.153293	8415	tags=51%, list=24%, signal=39%	HNF4A/NRBF2/THRA/ESRRB/NR2F1/NR1H4/RARB/MED1/ESR2/THRB/NR2C2/NR2E3/NR1D2/RORB/NR3C1/HNF4G/NCOR1/PPARA/NR3C2/NR4A1/RORA/NR4A2/PGR/AR/NR1I2/NR4A3/ESR1
REACTOME_SLBP_DEPENDENT_PROCESSING_OF_REPLICATION_DEPENDENT_HISTONE_PRE_MRNAS	REACTOME_SLBP_DEPENDENT_PROCESSING_OF_REPLICATION_DEPENDENT_HISTONE_PRE_MRNAS	11	0.642435	1.46238	0.0702055	0.207906	0.153875	10386	tags=73%, list=29%, signal=52%	SNRPE/SNRPF/SNRPB/LSM10/SNRPG/SNRPD3/NCBP2/SLBP
REACTOME_AKT_PHOSPHORYLATES_TARGETS_IN_THE_NUCLEUS	REACTOME_AKT_PHOSPHORYLATES_TARGETS_IN_THE_NUCLEUS	10	-0.603978	-1.493	0.0705596	0.208276	0.154149	9740	tags=80%, list=27%, signal=58%	FOXO3/AKT2/CREB1/AKT1/FOXO4/AKT3/FOXO1/NR4A1
REACTOME_PI3K_EVENTS_IN_ERBB4_SIGNALING	REACTOME_PI3K_EVENTS_IN_ERBB4_SIGNALING	10	-0.607435	-1.50155	0.0705596	0.208276	0.154149	3844	tags=50%, list=11%, signal=45%	PIK3CA/NRG3/EREG/PIK3R1/NRG1
REACTOME_RECOGNITION_OF_DNA_DAMAGE_BY_PCNA_CONTAINING_REPLICATION_COMPLEX	REACTOME_RECOGNITION_OF_DNA_DAMAGE_BY_PCNA_CONTAINING_REPLICATION_COMPLEX	30	0.483466	1.38011	0.0706767	0.208276	0.154149	10186	tags=40%, list=28%, signal=29%	UBA52/RBX1/RFC4/RPS27A/POLD1/DTL/POLE4/RFC2/POLE2/POLD2/RPA3/PCNA
REACTOME_TRANSPORT_OF_MATURE_TRANSCRIPT_TO_CYTOPLASM	REACTOME_TRANSPORT_OF_MATURE_TRANSCRIPT_TO_CYTOPLASM	84	0.38629	1.33502	0.0706806	0.208276	0.154149	11019	tags=44%, list=31%, signal=31%	LUZP4/DDX39A/NXT1/ALYREF/U2AF1L4/SARNP/THOC7/THOC6/MAGOHB/CHTOP/RBM8A/MAGOH/NUP93/THOC5/THOC1/SYMPK/CPSF4/NUP62/NUP210/NXF2B/RNPS1/THOC3/RAE1/NUP43/CPSF1/NUP37/NUP188/NCBP2/NXF2/SEC13/SRSF1/SLBP/SRSF3/SRSF7/UPF3B/SRSF2/CPSF3
BIOCARTA_NOS1_PATHWAY	BIOCARTA_NOS1_PATHWAY	21	-0.479613	-1.47235	0.0710383	0.208636	0.154415	8164	tags=43%, list=23%, signal=33%	PRKAR2A/PRKACB/PPP3CA/PRKAR1A/PRKCB/PRKCA/GRIN2B/GRIN2A/NOS1
WP_OXYSTEROLS_DERIVED_FROM_CHOLESTEROL	WP_OXYSTEROLS_DERIVED_FROM_CHOLESTEROL	21	-0.481427	-1.47792	0.0710383	0.208636	0.154415	4130	tags=43%, list=12%, signal=38%	CYP46A1/CYP7B1/IL17A/CYP7A1/IL25/EPHX2/NR1I2/CYP3A4/ESR1
WP_COVID19_ADVERSE_OUTCOME_PATHWAY	WP_COVID19_ADVERSE_OUTCOME_PATHWAY	15	-0.517588	-1.44505	0.071066	0.208636	0.154415	8993	tags=67%, list=25%, signal=50%	IL6/IL7/IL1B/ACE2/TNF/TMPRSS2/CXCL10/CSF3/IL10/CCL2
WP_PYRIMIDINE_METABOLISM	WP_PYRIMIDINE_METABOLISM	84	0.385934	1.33378	0.0719895	0.210857	0.156059	11718	tags=49%, list=33%, signal=33%	ENTPD3/NME1/POLR2J/UCK2/DTYMK/UPP1/NT5C/ZNRD1/NME3/POLR2I/TK1/POLR2H/POLR3C/POLR2K/POLR2L/POLR3K/POLR1C/POLD1/NME2/POLR2G/NME7/POLE4/NME4/POLA2/TYMP/NME6/NME1-NME2/POLE2/DCTPP1/POLD2/UCK1/UCKL1/POLR3G/POLR1D/RRM2/CAD/POLR2E/POLR1E/ENPP3/POLR2J3/POLR2J2
WP_TCA_CYCLE_AKA_KREBS_OR_CITRIC_ACID_CYCLE	WP_TCA_CYCLE_AKA_KREBS_OR_CITRIC_ACID_CYCLE	18	-0.501251	-1.46326	0.072	0.210857	0.156059	7068	tags=50%, list=20%, signal=40%	OGDH/DLST/SDHA/SDHD/SUCLA2/ACO2/DLD/SUCLG2/IDH3A
REACTOME_KERATAN_SULFATE_DEGRADATION	REACTOME_KERATAN_SULFATE_DEGRADATION	13	-0.53875	-1.45138	0.0721649	0.21108	0.156224	1732	tags=31%, list=5%, signal=29%	PRELP/LUM/OMD/OGN
WP_NOCGMPPKG_MEDIATED_NEUROPROTECTION	WP_NOCGMPPKG_MEDIATED_NEUROPROTECTION	48	-0.376258	-1.37443	0.0729167	0.212974	0.157626	6976	tags=50%, list=19%, signal=40%	CREB1/IL1B/XIAP/NPPA/NPR1/CNGA4/NOS3/TNF/GUCY1B1/CAMK2D/CNGA2/NFKB1/PDE3A/GUCY1A1/GRIN2B/BCL2/GUCY1A2/CNGA1/PDE2A/NOS2/CAMK2B/AKAP9/GRIN2A/NOS1
REACTOME_TRANSMISSION_ACROSS_CHEMICAL_SYNAPSES	REACTOME_TRANSMISSION_ACROSS_CHEMICAL_SYNAPSES	269	0.31789	1.24344	0.0731159	0.212974	0.157626	6515	tags=28%, list=18%, signal=23%	TUBA3E/TUBA3C/PPFIA4/SLC6A3/SLC18A3/CHRNB3/GRIK2/GABRA3/KCNJ9/GNG4/CACNG4/HTR3E/CHRNA1/TUBB8/ACTN2/SLC1A7/GAD1/GRIA2/TUBAL3/ERBB4/GNG8/SLC1A6/ADCY8/NEFL/CHRNA9/GABRB2/CACNA2D3/PRKCG/TUBA4B/GNGT1/CACNA1E/HRAS/HTR3B/GAD2/CHRND/TUBA4A/LIN7B/HTR3A/TUBB8B/GABRR1/CACNA1B/STX1A/GNG13/GRIA1/TUBB4B/GRIK5/SLC5A7/GABRR3/CACNG2/GABRB1/AP2S1/GNB3/GABRA5/NRGN/SYN3/GRIN2D/TUBA3D/KPNA2/GABRG2/HTR3C/GABRQ/TUBB4A/…
REACTOME_SCAVENGING_BY_CLASS_A_RECEPTORS	REACTOME_SCAVENGING_BY_CLASS_A_RECEPTORS	19	-0.487802	-1.44776	0.0731707	0.212974	0.157626	4857	tags=47%, list=14%, signal=41%	COL1A2/COL4A2/COL1A1/COL4A1/APOB/COL3A1/MASP1/MARCO/SCARA5
WP_OVERVIEW_OF_NANOPARTICLE_EFFECTS	WP_OVERVIEW_OF_NANOPARTICLE_EFFECTS	19	-0.487317	-1.44632	0.0731707	0.212974	0.157626	5921	tags=42%, list=17%, signal=35%	TNF/FN1/AKT3/COL4A1/BCL2/LAMA3/ITGAD/PTGS2
REACTOME_TRANSCRIPTION_COUPLED_NUCLEOTIDE_EXCISION_REPAIR_TC_NER_	REACTOME_TRANSCRIPTION_COUPLED_NUCLEOTIDE_EXCISION_REPAIR_TC_NER_	78	0.393384	1.34715	0.0733945	0.213364	0.157915	10876	tags=45%, list=30%, signal=31%	POLR2J/POLR2I/POLR2H/UBA52/POLR2K/RBX1/ISY1/RFC4/POLR2L/RPS27A/ERCC1/POLD1/GTF2H5/POLR2G/POLE4/POLR2F/COPS5/COPS7B/RFC2/COPS6/POLE2/ERCC2/CDK7/GPS1/POLD2/PPIE/XAB2/PRPF19/LIG1/XRCC1/RPA3/PCNA/HMGN1/COPS3/POLR2E
REACTOME_FORMATION_OF_THE_BETA_CATENIN_TCF_TRANSACTIVATING_COMPLEX	REACTOME_FORMATION_OF_THE_BETA_CATENIN_TCF_TRANSACTIVATING_COMPLEX	90	0.379318	1.32106	0.0735874	0.213452	0.157979	9202	tags=41%, list=26%, signal=31%	H3C7/H2AC20/H2BC10/H3C11/H3C14/H3C4/H2AC18/H2BC9/H2AX/H3-4/H2BU1/H2AC14/H2AB1/H4C13/H4C11/PYGO2/H4C2/H2AC4/H4C5/H2AJ/H4C4/H2AC7/H2AC19/RUVBL1/H4C14/H4C15/H2AZ1/H4C1/H4C6/H2BC3/BCL9/TERT/H2BC14/H2BC17/H2BC11/H2AC8/HDAC1
REACTOME_NUCLEOTIDE_LIKE_PURINERGIC_RECEPTORS	REACTOME_NUCLEOTIDE_LIKE_PURINERGIC_RECEPTORS	15	-0.514412	-1.43618	0.0736041	0.213452	0.157979	2947	tags=47%, list=8%, signal=43%	LPAR4/P2RY14/P2RY13/P2RY12/P2RY10/GPR17/P2RY4
BIOCARTA_PROTEASOME_PATHWAY	BIOCARTA_PROTEASOME_PATHWAY	19	0.546519	1.41346	0.0742496	0.214904	0.159055	10262	tags=68%, list=29%, signal=49%	PSMB4/PSMB3/PSMB6/PSMB1/PSMB7/PSMA4/PSMB2/PSMB5/PSMA7/PSMA3/PSMA5/PSMA1/PSMA2
REACTOME_ASSEMBLY_AND_CELL_SURFACE_PRESENTATION_OF_NMDA_RECEPTORS	REACTOME_ASSEMBLY_AND_CELL_SURFACE_PRESENTATION_OF_NMDA_RECEPTORS	44	0.445134	1.38653	0.0742857	0.214904	0.159055	6920	tags=41%, list=19%, signal=33%	TUBA3E/TUBA3C/TUBB8/ACTN2/TUBAL3/NEFL/TUBA4B/TUBA4A/LIN7B/TUBB8B/TUBB4B/GRIN2D/TUBA3D/TUBB4A/GRIN1/TUBA1C/TUBB2B/TUBA1A
KEGG_MATURITY_ONSET_DIABETES_OF_THE_YOUNG	KEGG_MATURITY_ONSET_DIABETES_OF_THE_YOUNG	25	0.506978	1.39603	0.0745814	0.215498	0.159494	4746	tags=36%, list=13%, signal=31%	NKX2-2/INS/NKX6-1/NEUROD1/PDX1/PAX4/PAX6/NEUROG3/FOXA3
BIOCARTA_CK1_PATHWAY	BIOCARTA_CK1_PATHWAY	16	0.560213	1.39524	0.0749186	0.216209	0.16002	1518	tags=19%, list=4%, signal=18%	PPP1R1B/GRM1/DRD2
BIOCARTA_STEM_PATHWAY	BIOCARTA_STEM_PATHWAY	15	0.581756	1.42678	0.0756579	0.218078	0.161404	5305	tags=33%, list=15%, signal=28%	EPO/IL11/IL4/IL9/CXCL8
WP_FIBRIN_COMPLEMENT_RECEPTOR_3_SIGNALING_PATHWAY	WP_FIBRIN_COMPLEMENT_RECEPTOR_3_SIGNALING_PATHWAY	41	-0.377109	-1.34019	0.0759076	0.218533	0.16174	6099	tags=56%, list=17%, signal=47%	IRAK4/ITGAM/IL6/IRAK2/FGA/CHUK/CBLB/AKT1/IL12B/TNF/TRAF6/TIRAP/CXCL10/MYD88/NFKB1/PIK3CA/PLAT/CCL2/TICAM2/TLR4/TLR3/NOS2/PLG
KEGG_PANCREATIC_CANCER	KEGG_PANCREATIC_CANCER	70	-0.339956	-1.33086	0.076	0.218534	0.161741	9004	tags=49%, list=25%, signal=36%	TGFB2/TGFBR1/PIK3R3/PIK3R5/MAPK8/ARAF/STAT1/CHUK/SMAD3/RALB/RALBP1/BRAF/AKT1/SMAD4/MAPK1/PIK3CB/KRAS/TGFB3/MAP2K1/RB1/NFKB1/CDK6/AKT3/PLD1/PIK3CA/CCND1/ARHGEF6/JAK1/EGFR/TGFBR2/TGFA/ERBB2/PIK3R1/PIK3CG
BIOCARTA_RANMS_PATHWAY	BIOCARTA_RANMS_PATHWAY	10	0.644299	1.43679	0.0761421	0.218679	0.161848	7636	tags=70%, list=21%, signal=55%	TPX2/KPNA2/AURKA/RANGAP1/RANBP1/KIF15/RAN
REACTOME_SIGNALING_BY_RHO_GTPASES	REACTOME_SIGNALING_BY_RHO_GTPASES	451	0.296199	1.19979	0.0763521	0.219017	0.162098	9938	tags=39%, list=28%, signal=28%	KLK3/TUBA3E/TUBA3C/S100A9/KLK2/NOX3/TUBB8/S100A8/CENPM/AURKB/SFN/KLC3/NUF2/CDC20/OBSCN/H3C7/PIK3R2/TUBAL3/H2AC20/H2BC10/H3C11/H3C14/H3C4/SKA1/KIF2C/ARHGAP40/TUBA4B/IQGAP3/PMF1/H2AC18/BIRC5/WIPF3/CENPA/SPC24/RPS27/PLK1/H2BC9/SPC25/TUBA4A/LIN7B/H2AX/TAX1BP3/TUBB8B/NOX1/H2BU1/NDC80/ARHGAP4/PKN1/H2AC14/ARPC4/CENPL/TUBB4B/H2AB1/ARPC1B/ARHGEF39/ARHGEF16/CENPF/H4C13/NUDC/RHPN1/H4C11/ARHGDIG/ARHGEF2/SGO2…
KEGG_EPITHELIAL_CELL_SIGNALING_IN_HELICOBACTER_PYLORI_INFECTION	KEGG_EPITHELIAL_CELL_SIGNALING_IN_HELICOBACTER_PYLORI_INFECTION	68	0.404834	1.34501	0.0771313	0.220986	0.163555	7912	tags=32%, list=22%, signal=25%	ATP6V1G3/ATP6V0D2/CXCL1/ATP6V1B1/MAPK12/ATP6V0A4/ATP6V0B/CXCR1/ATP6V1F/MAPK13/TCIRG1/ATP6V1C2/CXCL8/ATP6V0E1/CCL5/GIT1/SRC/RAC1/ATP6V1C1/ATP6AP1/ATP6V1E1/F11R
WP_MITOCHONDRIAL_CIII_ASSEMBLY	WP_MITOCHONDRIAL_CIII_ASSEMBLY	15	0.581357	1.4258	0.0773026	0.22121	0.163722	7191	tags=60%, list=20%, signal=48%	UQCC2/UQCC3/CYC1/UQCRB/UQCRQ/UQCRH/UQCR10/UQCR11/BCS1L
REACTOME_GLUCONEOGENESIS	REACTOME_GLUCONEOGENESIS	33	-0.410947	-1.38286	0.0776398	0.221908	0.164238	4342	tags=30%, list=12%, signal=27%	GOT2/SLC37A4/SLC25A13/PCK2/FBP2/G6PC/PCK1/FBP1/ALDOB/ENO3
REACTOME_AMINO_ACID_TRANSPORT_ACROSS_THE_PLASMA_MEMBRANE	REACTOME_AMINO_ACID_TRANSPORT_ACROSS_THE_PLASMA_MEMBRANE	33	0.46614	1.36533	0.0779412	0.222502	0.164678	2435	tags=24%, list=7%, signal=23%	SLC6A15/SLC7A10/SLC6A14/SLC36A2/SLC1A5/SLC6A19/SLC38A5/SLC7A3
REACTOME_ACTIVATION_OF_GENE_EXPRESSION_BY_SREBF_SREBP_	REACTOME_ACTIVATION_OF_GENE_EXPRESSION_BY_SREBF_SREBP_	42	-0.383195	-1.37278	0.0781759	0.222904	0.164976	9688	tags=60%, list=27%, signal=43%	NCOA6/NFYB/RXRA/MTF1/LSS/CARM1/DHCR7/FASN/SP1/NCOA2/SCD/MED1/HMGCR/GPAM/ELOVL6/NCOA1/HELZ2/TBL1X/CREBBP/PPARA/HMGCS1/SC5D/ACACB/CHD9/CYP51A1
REACTOME_POST_TRANSLATIONAL_MODIFICATION_SYNTHESIS_OF_GPI_ANCHORED_PROTEINS	REACTOME_POST_TRANSLATIONAL_MODIFICATION_SYNTHESIS_OF_GPI_ANCHORED_PROTEINS	93	0.372933	1.30918	0.0783055	0.223007	0.165051	6921	tags=34%, list=19%, signal=28%	PRSS41/ALPG/LY6K/ART3/LYPD4/PSCA/DPM3/LYPD6B/ALPI/DPM2/CEACAM5/LY6H/NTNG1/VNN2/LY6G6D/GPAA1/LYPD8/PIGC/SPRN/VNN3/PIGZ/FCGR3B/CD52/PIGU/RAET1G/ALPL/RAET1L/PRSS21/MELTF/NRN1L/CNTN5/LY6E
REACTOME_REGULATION_OF_INSULIN_SECRETION	REACTOME_REGULATION_OF_INSULIN_SECRETION	78	0.390187	1.3362	0.078637	0.223683	0.165551	4562	tags=23%, list=13%, signal=20%	GCG/KCNC2/INS/ABCC8/GNG4/GNG8/ADCY8/GNGT1/CACNA1E/KCNJ11/SLC2A1/FFAR1/STX1A/GNG13/ADRA2C/GNB3/ACSL4/SYT5
KEGG_HEDGEHOG_SIGNALING_PATHWAY	KEGG_HEDGEHOG_SIGNALING_PATHWAY	56	-0.362696	-1.36452	0.078853	0.223763	0.165611	6449	tags=52%, list=18%, signal=43%	BMP8B/GSK3B/PRKACB/SMO/WNT3/CSNK1G1/PTCH2/SHH/BMP2/DHH/BMP4/WNT16/FBXW11/WNT11/CSNK1A1L/CSNK1G3/BMP6/PTCH1/CSNK1A1/RAB23/BMP5/GLI2/WNT5B/GAS1/WNT2/WNT8B/WNT9B/HHIP/WNT7A
REACTOME_ASPARTATE_AND_ASPARAGINE_METABOLISM	REACTOME_ASPARTATE_AND_ASPARAGINE_METABOLISM	11	-0.570756	-1.46837	0.0789474	0.223763	0.165611	4342	tags=45%, list=12%, signal=40%	GOT2/SLC25A13/GADL1/FOLH1/ASPA
REACTOME_METALLOTHIONEINS_BIND_METALS	REACTOME_METALLOTHIONEINS_BIND_METALS	11	-0.573232	-1.47474	0.0789474	0.223763	0.165611	950	tags=55%, list=3%, signal=53%	MT1A/MT2A/MT1M/MT1F/MT1H/MT1G
WP_CANONICAL_AND_NONCANONICAL_TGFB_SIGNALING	WP_CANONICAL_AND_NONCANONICAL_TGFB_SIGNALING	17	-0.494985	-1.40779	0.0793651	0.224679	0.166289	10295	tags=59%, list=29%, signal=42%	MAPK14/BMP1/BMPR1A/TGFBR1/MAPK8/SMAD3/SMAD4/BMPR2/TGFBR2/GREM1
PID_CMYB_PATHWAY	PID_CMYB_PATHWAY	84	-0.31794	-1.27234	0.0798319	0.22558	0.166956	7526	tags=43%, list=21%, signal=34%	ZFHX3/SIN3A/TFEC/SP1/CD34/ETS2/SKI/MAT2A/PPP3CA/YEATS4/KRAS/CDKN1B/COL1A2/ELANE/MAF/ANPEP/LECT2/CDK6/CREBBP/CD4/TAB2/CCND1/MPO/IQGAP1/EP300/CA1/PAX5/BCL2/NCOR1/ETS1/SMARCA2/GATA1/HIPK2/KIT/PTGS2/GSTM1
BIOCARTA_FCER1_PATHWAY	BIOCARTA_FCER1_PATHWAY	39	-0.383281	-1.35475	0.08	0.22558	0.166956	7481	tags=44%, list=21%, signal=35%	PLCG1/MAPK8/NFATC2/MAPK1/PPP3CA/MS4A2/MAP3K1/PRKCB/MAP2K1/SOS1/PIK3CA/NFATC3/PLA2G4A/FCER1A/PIK3R1/PIK3CG/FOS
WP_SIMPLIFIED_DEPICTION_OF_MYD88_DISTINCT_INPUTOUTPUT_PATHWAY	WP_SIMPLIFIED_DEPICTION_OF_MYD88_DISTINCT_INPUTOUTPUT_PATHWAY	18	-0.495036	-1.44512	0.08	0.22558	0.166956	7398	tags=50%, list=21%, signal=40%	UBE2V1/TIFA/TRAF6/MYD88/NFKB1/TLR10/TLR6/TLR1/TLR4
BIOCARTA_EICOSANOID_PATHWAY	BIOCARTA_EICOSANOID_PATHWAY	22	-0.448777	-1.39652	0.0801105	0.22558	0.166956	4077	tags=36%, list=11%, signal=32%	CYSLTR2/PTGFR/PLA2G4A/CYP2J2/CYSLTR1/EPHX2/PTGS2/PTGIS
REACTOME_RMTS_METHYLATE_HISTONE_ARGININES	REACTOME_RMTS_METHYLATE_HISTONE_ARGININES	76	0.392354	1.33839	0.0801577	0.22558	0.166956	8421	tags=45%, list=24%, signal=34%	H3C7/H2AC20/H3C11/H3C14/H3C4/H2AC12/H2AC18/H2AW/RPS2/H2AX/H2AC14/H2AC21/SMARCD3/H2AB1/H4C13/H4C11/H4C2/H2AC4/H4C5/H2AJ/H4C4/H2AC7/PRMT1/H2AC19/H4C14/H4C15/H2AZ1/H2AC17/COPRS/WDR77/WDR5/H4C1/H4C6/SMARCB1
REACTOME_RESPONSE_TO_METAL_IONS	REACTOME_RESPONSE_TO_METAL_IONS	14	-0.51639	-1.39381	0.0807292	0.226133	0.167365	950	tags=43%, list=3%, signal=42%	MT1A/MT2A/MT1M/MT1F/MT1H/MT1G
PID_EPO_PATHWAY	PID_EPO_PATHWAY	33	-0.402467	-1.35432	0.0807453	0.226133	0.167365	8570	tags=58%, list=24%, signal=44%	PLCG1/MAPK8/STAT1/SOCS3/RAPGEF1/CBL/STAT5B/TRPC6/TEC/IRS2/NFKB1/SOS1/SH2B3/JAK2/PLCG2/PTPN11/BCL2/GAB1/PIK3R1
WP_VITAMIN_D_RECEPTOR_PATHWAY	WP_VITAMIN_D_RECEPTOR_PATHWAY	183	0.328776	1.24432	0.0807601	0.226133	0.167365	4329	tags=23%, list=12%, signal=20%	CASP14/CDX2/TREM1/ALPG/MEG8/S100A9/S100A2/CST1/CA9/S100A8/KRT13/KRTAP4-1/BGLAP/ALPI/LCE1F/SULT1C2/S100A6/G6PD/EFNA5/S100A4/CDKN2A/HILPDA/CREG2/KRT34/CYP24A1/KRT38/TNFSF4/SPP1/NOX1/KRTAP10-2/CASP5/CRACR2B/SALL4/HLA-DRB1/SPRR1B/CYP27B1/KRTAP5-4/CYP2S1/KRTAP5-1/SOSTDC1/ABCD1/ATP2C2
BIOCARTA_CARM1_PATHWAY	BIOCARTA_CARM1_PATHWAY	12	-0.549836	-1.45684	0.0808824	0.226133	0.167365	9349	tags=67%, list=26%, signal=49%	RXRA/CARM1/PRKAR2A/CREB1/PRKACB/PRKAR1A/CREBBP/EP300
REACTOME_DEATH_RECEPTOR_SIGNALLING	REACTOME_DEATH_RECEPTOR_SIGNALLING	141	-0.278062	-1.19612	0.0809249	0.226133	0.167365	8725	tags=40%, list=24%, signal=31%	BAG4/PLEKHG5/MAPK8/ARHGEF40/FGD2/CHUK/XIAP/ARHGEF3/CFLAR/GNA13/MCF2L/RTN4/CASP10/ITSN1/SPPL2A/TNFRSF10A/ARHGEF15/BIRC2/PREX1/NET1/TNFRSF10B/ARHGEF37/TNF/TNFAIP3/TRAF6/CYLD/ARHGEF9/TRIO/MYD88/ADAM17/TNFRSF10D/ARHGEF17/RNF31/NFKB1/SOS1/TAB2/TAB3/ARHGEF10/RASGRF2/ARHGEF18/ARHGEF6/AKAP13/BCL2L11/MAG/ABR/SOS2/NGFR/ARHGEF38/KALRN/ARHGEF12/ARHGEF26/USP2/TIAM1/FAS/FGD4/TNFSF10/SMPD3
REACTOME_METABOLISM_OF_PORPHYRINS	REACTOME_METABOLISM_OF_PORPHYRINS	26	-0.43587	-1.38753	0.0809249	0.226133	0.167365	5737	tags=42%, list=16%, signal=36%	FECH/SLCO1B3/GSTA1/ALAS2/ABCC2/ALB/ALAD/ABCG2/SLCO2B1/UGT1A4/SLCO1B1
REACTOME_DEADENYLATION_OF_MRNA	REACTOME_DEADENYLATION_OF_MRNA	25	-0.439333	-1.38406	0.0811594	0.226522	0.167653	7924	tags=56%, list=22%, signal=44%	PAN3/EIF4G1/EIF4A2/CNOT4/TNKS1BP1/CNOT8/EIF4E/EIF4B/CNOT7/TUT4/TUT7/PAN2/CNOT1/CNOT6L
BIOCARTA_PDZS_PATHWAY	BIOCARTA_PDZS_PATHWAY	17	-0.489216	-1.39138	0.0820106	0.22863	0.169213	5985	tags=59%, list=17%, signal=49%	DLG1/CASK/EPB41/NCAM1/DLG3/SPTBN1/NFASC/ANK1/NRXN3/DLG2
REACTOME_HEDGEHOG_LIGAND_BIOGENESIS	REACTOME_HEDGEHOG_LIGAND_BIOGENESIS	65	0.405281	1.3444	0.082544	0.229847	0.170114	10674	tags=45%, list=30%, signal=31%	PSMD4/PSMB4/PSMB3/SEM1/UBA52/PSMB6/PSMB9/RPS27A/PSMB8/PSME2/PSMB1/PSMD13/PSMB7/PSMC4/PSMC5/DERL2/PSMC3/PSMD14/PSMA4/PSMB2/PSMB5/PSMA7/PSMD8/PSMA3/PSMA5/PSMA1/PSMB11/PSMA2/IHH
REACTOME_CONVERSION_FROM_APC_C_CDC20_TO_APC_C_CDH1_IN_LATE_ANAPHASE	REACTOME_CONVERSION_FROM_APC_C_CDC20_TO_APC_C_CDH1_IN_LATE_ANAPHASE	20	0.531123	1.38706	0.0828025	0.230298	0.170447	5071	tags=25%, list=14%, signal=21%	UBE2C/UBE2S/CDC20/ANAPC11/ANAPC7
WP_MELANOMA	WP_MELANOMA	68	-0.3311	-1.30494	0.0836502	0.232212	0.171864	8794	tags=53%, list=25%, signal=40%	LAMTOR3/PIK3R3/CDKN1A/ARAF/CREB1/PTEN/BRAF/AKT1/MAPK1/PIK3CB/KRAS/MAP2K1/RB1/GADD45B/MDM2/NF1/CALML3/CDK6/AKT3/SOS1/PREX2/PIK3CA/CCND1/POLK/DDB2/SOS2/CALML4/MITF/ETS1/GADD45A/CDH1/PIK3R1/KIT/KDR/FOS/GRIN2A
BIOCARTA_RELA_PATHWAY	BIOCARTA_RELA_PATHWAY	15	-0.502906	-1.40406	0.0837563	0.232212	0.171864	10760	tags=60%, list=30%, signal=42%	TNFRSF1B/TNFRSF1A/RIPK1/CHUK/TNF/TRAF6/NFKB1/CREBBP/EP300
REACTOME_TRNA_PROCESSING_IN_THE_NUCLEUS	REACTOME_TRNA_PROCESSING_IN_THE_NUCLEUS	58	0.40966	1.33579	0.0837838	0.232212	0.171864	9321	tags=40%, list=26%, signal=29%	RPP25/RPP21/POP7/TSEN15/ZBTB8OS/RPP40/RPP30/POP5/TSEN54/NUP93/RAN/RPP38/CPSF4/NUP62/POP4/TSEN34/NUP210/RTRAF/RAE1/NUP43/CPSF1/NUP37/NUP188
BIOCARTA_ECM_PATHWAY	BIOCARTA_ECM_PATHWAY	19	-0.475692	-1.41182	0.0840108	0.23243	0.172026	6015	tags=47%, list=17%, signal=39%	MAP2K1/DIAPH1/PIK3CA/ARHGAP5/FYN/ROCK1/ITGB1/PIK3R1/PIK3CG
REACTOME_SIGNALING_BY_EGFR_IN_CANCER	REACTOME_SIGNALING_BY_EGFR_IN_CANCER	25	-0.437036	-1.37682	0.084058	0.23243	0.172026	4187	tags=40%, list=12%, signal=35%	CBL/KRAS/SOS1/PIK3CA/AREG/EREG/GAB1/EGFR/TGFA/PIK3R1
PID_CD8_TCR_PATHWAY	PID_CD8_TCR_PATHWAY	52	-0.366307	-1.34528	0.0842491	0.232688	0.172216	10262	tags=52%, list=29%, signal=37%	RAP1A/LCK/CD80/MALT1/STIM1/NRAS/PLCG1/CHUK/LCP2/AKT1/CBL/PRKCQ/KRAS/PRKCB/GRAP2/TRAF6/MAP3K14/PRKCA/RASGRP2/CD3G/SOS1/CD28/PDPK1/FYN/PRKCE/RASGRP1/PTPRC
BIOCARTA_GH_PATHWAY	BIOCARTA_GH_PATHWAY	27	-0.427724	-1.37299	0.0845481	0.233002	0.172449	7984	tags=59%, list=22%, signal=46%	PLCG1/SLC2A4/MAPK1/INSR/PRKCB/MAP2K1/STAT5B/PRKCA/SOS1/HNF1A/JAK2/PIK3CA/IRS1/PIK3R1/PIK3CG/GHR
WP_SYNAPTIC_SIGNALING_PATHWAYS_ASSOCIATED_WITH_AUTISM_SPECTRUM_DISORDER	WP_SYNAPTIC_SIGNALING_PATHWAYS_ASSOCIATED_WITH_AUTISM_SPECTRUM_DISORDER	50	-0.371755	-1.35066	0.0845588	0.233002	0.172449	9602	tags=60%, list=27%, signal=44%	AKT2/PRKAB2/NRAS/GRIN3A/ARC/PIK3R3/GSK3B/RPS6KB1/PTEN/AKT1/MAPK1/PIK3CB/KRAS/SYNGAP1/PRKAA1/NF1/UBE3A/AKT3/SHANK3/GRIN2B/PIK3CA/MTOR/BDNF/CACNA1C/CAMK4/PIK3R1/PRKAG2/CAMK2B/NTRK2/GRIN2A
WP_IL2_SIGNALING_PATHWAY	WP_IL2_SIGNALING_PATHWAY	42	-0.370565	-1.32754	0.0846906	0.233095	0.172518	8411	tags=43%, list=23%, signal=33%	STAT1/RPS6KB1/SOCS3/AKT1/MAPK1/CBL/MAP2K1/STAT5B/SOS1/PTPN11/FYN/PTK2B/JAK1/BCL2/CISH/IL2RB/PIK3R1/FOS
SIG_INSULIN_RECEPTOR_PATHWAY_IN_CARDIAC_MYOCYTES	SIG_INSULIN_RECEPTOR_PATHWAY_IN_CARDIAC_MYOCYTES	51	-0.362837	-1.32605	0.0848708	0.233321	0.172685	8322	tags=45%, list=23%, signal=35%	GSK3B/RPS6KB1/SLC2A4/PTEN/AKT1/MAPK1/YWHAQ/CBL/LNPEP/IGFBP1/CYTH3/IRS2/AKT3/SOS1/PIK3CA/PDPK1/IRS1/SOS2/FOXO1/SORBS1/RPS6KA2/PIK3R1/NPY4R
REACTOME_REGULATION_OF_FOXO_TRANSCRIPTIONAL_ACTIVITY_BY_ACETYLATION	REACTOME_REGULATION_OF_FOXO_TRANSCRIPTIONAL_ACTIVITY_BY_ACETYLATION	10	-0.588968	-1.4559	0.0851582	0.233841	0.17307	4672	tags=90%, list=13%, signal=78%	FOXO3/SIRT3/FOXO4/TXNIP/CREBBP/SIRT1/EP300/FOXO1/KAT2B
WP_TRANSCRIPTION_FACTOR_REGULATION_IN_ADIPOGENESIS	WP_TRANSCRIPTION_FACTOR_REGULATION_IN_ADIPOGENESIS	22	-0.447166	-1.3915	0.0856354	0.234813	0.17379	9349	tags=73%, list=26%, signal=54%	RXRA/IL6/MAPK8/CREB1/SLC2A4/INSR/TNF/IRS2/LPIN1/PPARGC1A/NR3C1/IRS1/PCK2/FOXO1/NRIP1/ADIPOQ
REACTOME_DISEASES_ASSOCIATED_WITH_GLYCOSAMINOGLYCAN_METABOLISM	REACTOME_DISEASES_ASSOCIATED_WITH_GLYCOSAMINOGLYCAN_METABOLISM	41	-0.37035	-1.31617	0.0858086	0.234813	0.17379	2590	tags=29%, list=7%, signal=27%	CHSY1/GPC4/PRELP/GPC5/NCAN/PAPSS2/VCAN/LUM/HSPG2/DCN/OMD/OGN
ST_GA13_PATHWAY	ST_GA13_PATHWAY	37	-0.383331	-1.32483	0.0858086	0.234813	0.17379	8467	tags=59%, list=24%, signal=45%	DLG4/CFB/MAP2K4/AKT2/MAPK8/ROCK2/AKT1/GNA13/PI3/PIK3CB/MAP3K1/PRKD1/SERPINA4/NFKB1/AKT3/PLD1/PDPK1/RDX/BCL2/LPA/ROCK1/MAP3K5
WP_GLYCOLYSIS_AND_GLUCONEOGENESIS	WP_GLYCOLYSIS_AND_GLUCONEOGENESIS	44	-0.378259	-1.35834	0.0860927	0.235077	0.173985	1718	tags=18%, list=5%, signal=17%	FBP2/G6PC/LDHAL6B/PCK1/SLC2A2/FBP1/ALDOB/ENO3
REACTOME_CRISTAE_FORMATION	REACTOME_CRISTAE_FORMATION	29	0.481798	1.37025	0.0861027	0.235077	0.173985	6718	tags=41%, list=19%, signal=34%	ATP5MC1/ATP5MF/ATP5ME/ATP5F1D/ATP5F1E/MICOS13/MTX1/ATP5MC2/TMEM11/MICOS10/ATP5PD/ATP5MG
PID_TRKR_PATHWAY	PID_TRKR_PATHWAY	61	-0.344789	-1.31992	0.0864662	0.23576	0.174491	7477	tags=38%, list=21%, signal=30%	MAPK1/MCF2L/RAPGEF1/RAP1B/KRAS/PRKCZ/MAP2K1/NTRK3/DOCK1/SOS1/PIK3CA/CCND1/PTPN11/FRS2/NGFR/BDNF/NTF3/GAB1/RASGRF1/RASA1/TIAM1/PIK3R1/NTRK2
REACTOME_REGULATION_OF_PTEN_STABILITY_AND_ACTIVITY	REACTOME_REGULATION_OF_PTEN_STABILITY_AND_ACTIVITY	69	0.397029	1.33138	0.0865513	0.23576	0.174491	10262	tags=43%, list=29%, signal=31%	PSMD4/PSMB4/PSMB3/CSNK2B/SEM1/UBA52/PSMB6/PSMB9/RPS27A/PSMB8/PSME2/PSMB1/PSMD13/PSMB7/PSMC4/PSMC5/PSMC3/PSMD14/TRIM27/PSMA4/PSMB2/PSMB5/PSMA7/PSMD8/PSMA3/PSMA5/OTUD3/PSMA1/PSMB11/PSMA2
KEGG_ARRHYTHMOGENIC_RIGHT_VENTRICULAR_CARDIOMYOPATHY_ARVC	KEGG_ARRHYTHMOGENIC_RIGHT_VENTRICULAR_CARDIOMYOPATHY_ARVC	74	-0.333279	-1.30563	0.0871369	0.236813	0.17527	7340	tags=42%, list=20%, signal=33%	ITGAV/ATP2A2/ITGA7/CACNA1D/GJA1/ITGA6/CTNNB1/ITGB8/DSP/SGCB/SGCA/DSG2/ITGA8/SLC8A1/CACNG3/ITGA10/ITGA1/ITGA2/CDH2/SGCD/CACNA2D1/CACNA1C/PKP2/ITGB7/ITGB1/ITGA9/ITGB3/DMD/ITGA4/LAMA2/CTNNA3
WP_ARRHYTHMOGENIC_RIGHT_VENTRICULAR_CARDIOMYOPATHY	WP_ARRHYTHMOGENIC_RIGHT_VENTRICULAR_CARDIOMYOPATHY	74	-0.333279	-1.30563	0.0871369	0.236813	0.17527	7340	tags=42%, list=20%, signal=33%	ITGAV/ATP2A2/ITGA7/CACNA1D/GJA1/ITGA6/CTNNB1/ITGB8/DSP/SGCB/SGCA/DSG2/ITGA8/SLC8A1/CACNG3/ITGA10/ITGA1/ITGA2/CDH2/SGCD/CACNA2D1/CACNA1C/PKP2/ITGB7/ITGB1/ITGA9/ITGB3/DMD/ITGA4/LAMA2/CTNNA3
REACTOME_NUCLEOTIDE_EXCISION_REPAIR	REACTOME_NUCLEOTIDE_EXCISION_REPAIR	110	0.359976	1.27999	0.0873418	0.237066	0.175457	10876	tags=44%, list=30%, signal=30%	POLR2J/POLR2I/POLR2H/TFPT/UBA52/POLR2K/RBX1/ISY1/RFC4/POLR2L/ACTR5/RPS27A/ERCC1/INO80B/MCRS1/POLD1/RUVBL1/GTF2H5/ACTB/POLR2G/POLE4/INO80C/POLR2F/CHD1L/COPS5/UBE2I/COPS7B/RFC2/COPS6/POLE2/ERCC2/CDK7/GPS1/INO80E/PARP1/POLD2/PPIE/XAB2/PRPF19/LIG1/XRCC1/UBE2V2/RPA3/PCNA/HMGN1/COPS3/CETN2/POLR2E
BIOCARTA_NFKB_PATHWAY	BIOCARTA_NFKB_PATHWAY	21	-0.467572	-1.43539	0.0874317	0.237066	0.175457	6213	tags=57%, list=17%, signal=47%	TNFRSF1B/TNFRSF1A/RIPK1/CHUK/MAP3K1/TNF/TNFAIP3/TRAF6/MAP3K14/MYD88/NFKB1/IL1R1
BIOCARTA_SHH_PATHWAY	BIOCARTA_SHH_PATHWAY	16	-0.503522	-1.41887	0.0876289	0.237066	0.175457	9565	tags=69%, list=27%, signal=50%	GLI3/SUFU/GSK3B/PRKAR2A/PRKACB/SMO/PRKAR1A/SHH/DYRK1A/PTCH1/GLI2
REACTOME_SIGNALING_BY_ERBB2_ECD_MUTANTS	REACTOME_SIGNALING_BY_ERBB2_ECD_MUTANTS	16	-0.505182	-1.42355	0.0876289	0.237066	0.175457	6477	tags=50%, list=18%, signal=41%	KRAS/ERBIN/SOS1/PIK3CA/GAB1/EGFR/ERBB2/PIK3R1
PID_TCPTP_PATHWAY	PID_TCPTP_PATHWAY	42	-0.369726	-1.32453	0.0879479	0.237563	0.175824	6938	tags=52%, list=19%, signal=42%	PIK3R3/ATR/STAT1/STAT6/INSR/PIK3CB/PIAS1/STAT5B/EIF2AK2/PDGFRB/CREBBP/LMAN1/ITGA1/SOS1/PIK3CA/JAK1/MET/GAB1/EGFR/ITGB1/PIK3R1/KDR
KEGG_PENTOSE_PHOSPHATE_PATHWAY	KEGG_PENTOSE_PHOSPHATE_PATHWAY	27	0.483479	1.35573	0.0880121	0.237563	0.175824	6504	tags=41%, list=18%, signal=33%	TKTL1/TKTL2/PRPS1L1/G6PD/TKT/ALDOA/PGLS/TALDO1/RPIA/PGD/ALDOC
WP_NUCLEAR_RECEPTORS	WP_NUCLEAR_RECEPTORS	38	-0.380814	-1.34046	0.0882353	0.2376	0.175852	7961	tags=50%, list=22%, signal=39%	THRA/ESRRB/NR2F1/RARB/ESR2/THRB/NR2C2/NR1D2/ROR1/NR3C1/NR2F2/PPARA/NR4A1/RORA/NR4A2/PGR/AR/NR1I2/ESR1
WP_G1_TO_S_CELL_CYCLE_CONTROL	WP_G1_TO_S_CELL_CYCLE_CONTROL	64	0.406339	1.34043	0.0883152	0.2376	0.175852	8212	tags=38%, list=23%, signal=29%	CDKN1C/ORC6/CDKN2A/CDC25A/CDC45/CDK1/CCNB1/E2F2/CDKN2D/MCM5/MCM7/CCNA1/E2F1/MYT1/ORC1/MCM2/CREB3L4/CREB3L1/CREB3/POLA2/MCM4/CDKN2C/POLE2/CDK7
KEGG_PENTOSE_AND_GLUCURONATE_INTERCONVERSIONS	KEGG_PENTOSE_AND_GLUCURONATE_INTERCONVERSIONS	28	-0.423932	-1.37437	0.0887574	0.2376	0.175852	2026	tags=32%, list=6%, signal=30%	UGP2/UGT2B15/UGT2B7/UGT1A1/UGT2B10/UGT2A3/UGT1A4/UGT1A3/UGT2B17
PID_TCR_CALCIUM_PATHWAY	PID_TCR_CALCIUM_PATHWAY	28	-0.422015	-1.36816	0.0887574	0.2376	0.175852	4922	tags=29%, list=14%, signal=25%	RCAN2/CHP1/CD40LG/NFATC3/AKAP5/RCAN1/FOS/PTGS2
REACTOME_NOTCH_HLH_TRANSCRIPTION_PATHWAY	REACTOME_NOTCH_HLH_TRANSCRIPTION_PATHWAY	28	-0.419117	-1.35876	0.0887574	0.2376	0.175852	5014	tags=36%, list=14%, signal=31%	TBL1X/NOTCH4/CREBBP/MAML3/NOTCH3/NCOR1/HDAC6/MAML2/NOTCH2/KAT2B
REACTOME_PLATELET_CALCIUM_HOMEOSTASIS	REACTOME_PLATELET_CALCIUM_HOMEOSTASIS	28	-0.424345	-1.37571	0.0887574	0.2376	0.175852	7793	tags=61%, list=22%, signal=48%	ATP2A3/STIM1/TRPC7/ATP2B1/P2RX7/ATP2B2/ATP2A2/ITPR3/TRPC6/P2RX1/SLC8A1/TRPC3/SLC8A3/ITPR2/ITPR1/P2RX3/P2RX2
WP_MRNA_PROCESSING	WP_MRNA_PROCESSING	126	0.345727	1.26095	0.0887793	0.2376	0.175852	11587	tags=39%, list=32%, signal=26%	SNRPD2/SNRPE/LSM7/SNRPF/SF3B4/CELF4/SNRPB/SNRPA/SNRPN/SF3A2/SNRPD1/SF3B5/SNU13/SNRPG/TXNL4A/LSM2/PABPN1/SNRPA1/CLASRP/CLK2/PRMT1/PRPF3/PRPF6/SNRNP70/CPSF4/SNRPD3/SNRPB2/RNPS1/CD2BP2/HNRNPAB/PHF5A/SUGP1/PPM1G/CPSF1/YBX1/NCBP2/SFPQ/SUPT5H/SRSF1/SFSWAP/SRSF3/SRSF7/DNAJC8/RBM17/SRSF2/CPSF3/FUS/U2AF1L5/PTBP1
PID_S1P_S1P2_PATHWAY	PID_S1P_S1P2_PATHWAY	24	-0.441293	-1.3856	0.0888252	0.2376	0.175852	3146	tags=58%, list=9%, signal=53%	MAPK14/ELK1/GNAI1/GNA11/GNAI3/MAPK8/GNA13/MAPK1/GNAQ/IRS1/CDH5/GNA14/FOS/GNAO1
PID_FGF_PATHWAY	PID_FGF_PATHWAY	55	-0.355324	-1.33216	0.088968	0.237714	0.175937	7589	tags=47%, list=21%, signal=37%	AKT1/MAPK1/FGF1/CBL/RUNX2/SPRY2/STAT5B/FGFR2/SSH1/NCAM1/SOS1/CDH2/PIK3CA/PTPN11/PDPK1/FRS2/PTK2B/MET/FGF18/GAB1/CTNND1/FGF2/CDH1/PIK3R1/FOS/FGF23
PID_ATR_PATHWAY	PID_ATR_PATHWAY	38	0.444487	1.3491	0.0890805	0.237748	0.175961	9192	tags=42%, list=26%, signal=31%	CDC25A/PLK1/CDC6/RAD51/RFC4/TIPIN/FANCD2/CDC25C/MCM7/PPP2R1A/MCM2/CHEK1/YWHAZ/RFC2/RAD9A/CCNA2
PID_S1P_S1P1_PATHWAY	PID_S1P_S1P1_PATHWAY	21	-0.459711	-1.41126	0.0901639	0.240213	0.177786	2624	tags=24%, list=7%, signal=22%	S1PR1/KDR/ITGB3/PTGS2/GNAO1
KEGG_GLYOXYLATE_AND_DICARBOXYLATE_METABOLISM	KEGG_GLYOXYLATE_AND_DICARBOXYLATE_METABOLISM	16	-0.500808	-1.41122	0.0902062	0.240213	0.177786	5181	tags=44%, list=14%, signal=37%	ACO2/GLYCTK/GRHPR/ACO1/MTHFD1/HAO1/HAO2
REACTOME_HORMONE_LIGAND_BINDING_RECEPTORS	REACTOME_HORMONE_LIGAND_BINDING_RECEPTORS	12	0.601822	1.41101	0.0909091	0.241544	0.178771	1605	tags=25%, list=4%, signal=24%	CGA/LHB/GPHA2
WP_BMP_SIGNALING_PATHWAY_IN_EYELID_DEVELOPMENT	WP_BMP_SIGNALING_PATHWAY_IN_EYELID_DEVELOPMENT	20	-0.461876	-1.39591	0.0909091	0.241544	0.178771	6449	tags=50%, list=18%, signal=41%	SMAD4/SHH/MAP3K1/BMP4/FGFR2/DKK2/EGFR/TGFA/SMAD1/SFRP1
PID_ARF6_PATHWAY	PID_ARF6_PATHWAY	35	-0.382516	-1.31811	0.091195	0.241743	0.178918	7247	tags=46%, list=20%, signal=36%	LHCGR/EPHA2/ACAP2/NCK1/CYTH3/ADRB2/GNAQ/ARRB1/IPCEF1/MET/FBXO8/ARAP2/KIF13B/EGFR/GNA14/ITGB3
REACTOME_GAP_FILLING_DNA_REPAIR_SYNTHESIS_AND_LIGATION_IN_GG_NER	REACTOME_GAP_FILLING_DNA_REPAIR_SYNTHESIS_AND_LIGATION_IN_GG_NER	25	0.496556	1.36733	0.0913242	0.241743	0.178918	10186	tags=48%, list=28%, signal=34%	UBA52/RFC4/RPS27A/POLD1/POLE4/RFC2/POLE2/POLD2/LIG1/XRCC1/RPA3/PCNA
REACTOME_GLYCOGEN_BREAKDOWN_GLYCOGENOLYSIS_	REACTOME_GLYCOGEN_BREAKDOWN_GLYCOGENOLYSIS_	15	-0.498693	-1.39229	0.0913706	0.241743	0.178918	2555	tags=33%, list=7%, signal=31%	PHKB/PGM2/PYGL/PHKA1/AGL
WP_RETINOBLASTOMA_GENE_IN_CANCER	WP_RETINOBLASTOMA_GENE_IN_CANCER	87	0.376795	1.30714	0.0913907	0.241743	0.178918	10395	tags=43%, list=29%, signal=30%	CDT1/CDC25A/CDC45/CDK1/CCNB1/E2F2/RABIF/TTK/CCNB2/STMN1/MAPK13/RFC4/MCM7/ANLN/E2F1/KIF4A/SAP30/ORC1/CHEK1/HMGB2/FANCG/H2AZ1/RBP1/CDC25B/MCM4/POLE2/PLK4/TOP2A/SUV39H1/CDC7/CCNA2/HDAC1/MCM6/RPA3/PCNA/MCM3/RRM2
KEGG_B_CELL_RECEPTOR_SIGNALING_PATHWAY	KEGG_B_CELL_RECEPTOR_SIGNALING_PATHWAY	75	-0.328154	-1.28583	0.0916667	0.241935	0.17906	9662	tags=48%, list=27%, signal=35%	CR2/PIK3AP1/MALT1/AKT2/VAV2/NRAS/CD22/INPP5D/PIK3R3/RASGRP3/PIK3R5/CHUK/GSK3B/BLNK/AKT1/NFATC2/MAPK1/PPP3CA/PIK3CB/KRAS/PRKCB/MAP2K1/NFKB1/AKT3/SOS1/CHP1/DAPP1/PIK3CA/PLCG2/NFATC3/SOS2/PIK3R1/PIK3CG/NFAT5/FOS/CHP2
WP_PATHWAYS_IN_CLEAR_CELL_RENAL_CELL_CARCINOMA	WP_PATHWAYS_IN_CLEAR_CELL_RENAL_CELL_CARCINOMA	85	-0.316302	-1.27103	0.0916667	0.241935	0.17906	7968	tags=38%, list=22%, signal=29%	LDHC/CEP290/PTEN/SDS/KCNJ2/GRB10/AKT1/FASN/VHL/HIF1A/LDHD/TGFB3/SETD2/PFKM/PDGFRB/BHLHE41/CREBBP/SHMT1/SSPN/EP300/MTOR/FLT1/ZEB1/CDH13/PGM2/ACACB/PGM1/EGFR/RAPGEF5/KDR/ALDOB/ENO3
BIOCARTA_ALK_PATHWAY	BIOCARTA_ALK_PATHWAY	37	-0.376509	-1.30125	0.0924092	0.243299	0.18007	9176	tags=62%, list=26%, signal=46%	NOG/TGFB2/TGFBR1/GSK3B/ACVR1/SMAD4/RFC1/NPPA/BMP2/TGFB3/BMP4/CTNNB1/FZD1/MEF2C/SMAD6/HNF1A/BMPR2/APC/BMP5/TGFBR2/TGFBR3/SMAD1/BMP10
REACTOME_CASPASE_ACTIVATION_VIA_EXTRINSIC_APOPTOTIC_SIGNALLING_PATHWAY	REACTOME_CASPASE_ACTIVATION_VIA_EXTRINSIC_APOPTOTIC_SIGNALLING_PATHWAY	26	-0.427146	-1.35976	0.0924855	0.243299	0.18007	1931	tags=23%, list=5%, signal=22%	DAPK1/TICAM2/FAS/TLR4/UNC5A/TNFSF10
REACTOME_PYRUVATE_METABOLISM_AND_CITRIC_ACID_TCA_CYCLE	REACTOME_PYRUVATE_METABOLISM_AND_CITRIC_ACID_TCA_CYCLE	55	-0.349718	-1.31114	0.0925267	0.243299	0.18007	6514	tags=35%, list=18%, signal=28%	LDHC/MPC1/OGDH/DLST/SDHA/SDHD/SUCLA2/ACO2/DLD/SLC16A1/SUCLG2/PDK2/IDH3A/NNT/L2HGDH/LDHAL6B/SLC16A8/GSTZ1/PDK4
BIOCARTA_SPRY_PATHWAY	BIOCARTA_SPRY_PATHWAY	17	-0.479928	-1.36497	0.0925926	0.243299	0.18007	7477	tags=59%, list=21%, signal=47%	MAPK1/CBL/SPRY3/SPRY2/MAP2K1/SOS1/SPRY1/EGFR/RASA1/PTPRB
REACTOME_SIGNALING_BY_FGFR2_IN_DISEASE	REACTOME_SIGNALING_BY_FGFR2_IN_DISEASE	43	-0.368014	-1.31944	0.0927152	0.243352	0.180109	5752	tags=35%, list=16%, signal=29%	POLR2B/FGFR2/FGF16/POLR2A/SOS1/PIK3CA/FRS2/FGF18/GAB1/FGF2/FGF20/PIK3R1/FGF7/FGF23/FGF5
BIOCARTA_VEGF_PATHWAY	BIOCARTA_VEGF_PATHWAY	27	-0.417026	-1.33865	0.0932945	0.243897	0.180513	8570	tags=48%, list=24%, signal=37%	PLCG1/EIF1AX/VHL/HIF1A/PRKCB/NOS3/PRKCA/FLT4/PIK3CA/FLT1/PIK3R1/KDR/PIK3CG
REACTOME_INTERLEUKIN_RECEPTOR_SHC_SIGNALING	REACTOME_INTERLEUKIN_RECEPTOR_SHC_SIGNALING	27	-0.416133	-1.33578	0.0932945	0.243897	0.180513	4187	tags=30%, list=12%, signal=26%	SOS1/IL5RA/JAK2/PIK3CA/JAK1/CSF2RB/IL2RB/PIK3R1
PID_INTEGRIN4_PATHWAY	PID_INTEGRIN4_PATHWAY	11	-0.558112	-1.43584	0.0933014	0.243897	0.180513	2655	tags=64%, list=7%, signal=59%	ITGB4/LAMB2/ITGA6/LAMB3/LAMC2/LAMA3/LAMA2
REACTOME_SHC_MEDIATED_CASCADE_FGFR3	REACTOME_SHC_MEDIATED_CASCADE_FGFR3	18	-0.489164	-1.42798	0.0933333	0.243897	0.180513	5076	tags=50%, list=14%, signal=43%	FGF1/KRAS/FGF16/SOS1/FGF18/FGF2/FGF20/FGF23/FGF5
WP_MICROGLIA_PATHOGEN_PHAGOCYTOSIS_PATHWAY	WP_MICROGLIA_PATHOGEN_PHAGOCYTOSIS_PATHWAY	40	0.42971	1.32218	0.0934844	0.244013	0.180599	5838	tags=32%, list=16%, signal=27%	TREM1/PIK3R2/FCGR1A/FCER1G/TREM2/ARPC1B/TYROBP/C1QA/CYBA/NCF2/NCF4/C1QB/NCF1
REACTOME_NOTCH4_INTRACELLULAR_DOMAIN_REGULATES_TRANSCRIPTION	REACTOME_NOTCH4_INTRACELLULAR_DOMAIN_REGULATES_TRANSCRIPTION	20	-0.458187	-1.38476	0.0935829	0.244013	0.180599	5993	tags=45%, list=17%, signal=37%	HEY2/FLT4/NOTCH4/CREBBP/MAML3/EP300/MAML2/NOTCH2/KAT2B
REACTOME_UNFOLDED_PROTEIN_RESPONSE_UPR_	REACTOME_UNFOLDED_PROTEIN_RESPONSE_UPR_	91	0.368159	1.28822	0.09375	0.244181	0.180723	9185	tags=37%, list=26%, signal=28%	EXOSC4/DDIT3/LMNA/EXOSC5/MYDGF/EXOSC1/ATF4/ASNS/CXCL8/EXOSC7/HDGF/ARFGAP1/DNAJB11/CEBPB/SRPRB/EXOSC3/TATDN2/CREB3L4/WFS1/EXOSC8/CREB3L1/CXXC1/CREB3/EIF2S2/CALR/EXOSC9/GSK3A/KLHDC3/HSPA5/SHC1/ZBTB17/EXTL1/YIF1A/EXOSC2
REACTOME_REGULATION_OF_INSULIN_LIKE_GROWTH_FACTOR_IGF_TRANSPORT_AND_UPTAKE_BY_INSULIN_LIKE_GROWTH_FACTOR_BINDING_PROTEINS_IGFBPS_	REACTOME_REGULATION_OF_INSULIN_LIKE_GROWTH_FACTOR_IGF_TRANSPORT_AND_UPTAKE_BY_INSULIN_LIKE_GROWTH_FACTOR_BINDING_PROTEINS_IGFBPS_	124	0.346255	1.25855	0.094176	0.245022	0.181345	3071	tags=16%, list=9%, signal=15%	AMBN/KLK3/BPIFB2/AFP/VGF/KLK2/AMTN/STC2/KLK1/APOA2/QSOX1/SCG3/LGALS1/PENK/GPC3/SPP1/DMP1/MMP1/MATN3/FSTL3
BIOCARTA_VDR_PATHWAY	BIOCARTA_VDR_PATHWAY	24	-0.431602	-1.35517	0.0945559	0.245306	0.181556	9427	tags=54%, list=26%, signal=40%	TOP2B/RXRA/COPS2/CARM1/BAZ1B/MED1/NCOA1/CREBBP/ARID1A/EP300/NCOR1/SMARCC2/KAT2B
REACTOME_DISEASES_OF_IMMUNE_SYSTEM	REACTOME_DISEASES_OF_IMMUNE_SYSTEM	24	-0.435785	-1.36831	0.0945559	0.245306	0.181556	5456	tags=38%, list=15%, signal=32%	CD36/TIRAP/MYD88/NFKB1/TLR10/TLR6/TLR1/TLR4/TLR3
PID_ER_NONGENOMIC_PATHWAY	PID_ER_NONGENOMIC_PATHWAY	40	-0.373607	-1.31886	0.0945946	0.245306	0.181556	7952	tags=40%, list=22%, signal=31%	ROCK2/AKT1/GNA13/GNG2/KRAS/ESR2/NOS3/GNAQ/STRN/MMP2/SOS1/PIK3CA/PIK3R1/GNA14/GNAO1/ESR1
REACTOME_BICARBONATE_TRANSPORTERS	REACTOME_BICARBONATE_TRANSPORTERS	10	-0.571541	-1.41282	0.0948905	0.245806	0.181925	2788	tags=70%, list=8%, signal=65%	SLC4A2/SLC4A9/SLC4A7/SLC4A10/AHCYL2/SLC4A4/SLC4A1
REACTOME_SIGNALING_BY_ERBB4	REACTOME_SIGNALING_BY_ERBB4	58	-0.348524	-1.31138	0.0954198	0.246908	0.182741	4187	tags=28%, list=12%, signal=24%	SOS1/TAB2/PIK3CA/YAP1/NRG3/NCOR1/ITCH/NEDD4/EREG/EGFR/PIK3R1/PGR/CXCL12/NRG1/ESR1/GABRB3
REACTOME_FATTY_ACYL_COA_BIOSYNTHESIS	REACTOME_FATTY_ACYL_COA_BIOSYNTHESIS	37	-0.37471	-1.29503	0.0957096	0.247308	0.183037	7539	tags=46%, list=21%, signal=36%	HACD3/FASN/SCD/ACSBG1/OLAH/HACD4/ELOVL6/ELOVL5/ACSL5/HACD2/HTD2/ELOVL7/ACSL6/CBR4/ACSL1/SCD5/TECRL
REACTOME_REGULATION_OF_GENE_EXPRESSION_IN_BETA_CELLS	REACTOME_REGULATION_OF_GENE_EXPRESSION_IN_BETA_CELLS	21	0.518607	1.3706	0.0959119	0.247308	0.183037	5430	tags=38%, list=15%, signal=32%	NKX2-2/INS/NKX6-1/NEUROD1/PDX1/PAX6/FOXA3/RFX6
REACTOME_PREGNENOLONE_BIOSYNTHESIS	REACTOME_PREGNENOLONE_BIOSYNTHESIS	12	0.597882	1.40177	0.0959596	0.247308	0.183037	3760	tags=42%, list=11%, signal=37%	STAR/FDX2/TSPO/STARD6/AKR1B1
REACTOME_ADORA2B_MEDIATED_ANTI_INFLAMMATORY_CYTOKINES_PRODUCTION	REACTOME_ADORA2B_MEDIATED_ANTI_INFLAMMATORY_CYTOKINES_PRODUCTION	133	0.341283	1.25391	0.0959903	0.247308	0.183037	5285	tags=22%, list=15%, signal=19%	CALCA/CGA/GCG/RLN3/GIP/GNG4/AVP/LHB/GNG8/ADCY8/GHRHR/TAAR6/GPHA2/TAAR8/GNGT1/GIPR/ADM2/RLN2/GPR27/NPSR1/GNG13/VIP/GNB3/GPR84/SCT/P2RY11/CRHR1/TAAR9/CALCR
KEGG_ANTIGEN_PROCESSING_AND_PRESENTATION	KEGG_ANTIGEN_PROCESSING_AND_PRESENTATION	79	0.380755	1.30276	0.0961792	0.247526	0.183198	9275	tags=38%, list=26%, signal=28%	HSPA6/RFXANK/HSPA1A/HSPA1B/HLA-DMA/KLRC2/IFI30/HLA-DRB1/HLA-DQB1/HLA-A/CD8B/HLA-F/HLA-DOB/PSME2/HLA-DRB5/HLA-G/CD74/IFNA5/HLA-B/HLA-DQA2/HSPA4/CALR/TAP2/HLA-DPB1/HSPA5/HLA-DQA1/CTSS/PDIA3/KIR2DS4/HSP90AB1
WP_STRUCTURAL_PATHWAY_OF_INTERLEUKIN_1_IL1	WP_STRUCTURAL_PATHWAY_OF_INTERLEUKIN_1_IL1	49	-0.361022	-1.30968	0.0964286	0.24788	0.18346	10295	tags=53%, list=29%, signal=38%	MAPK14/ELK1/ATF2/MAP2K4/IRAK4/IRAK2/MAPK8/CHUK/TANK/MAPK1/EIF4E/MAP3K1/MAP3K3/MAP2K1/TRAF6/MAP3K14/MYD88/NFKB1/MBP/IL1RAP/MAP2K6/TAB2/TAB3/RPS6KA5/IL1R1/FOS
REACTOME_COLLAGEN_BIOSYNTHESIS_AND_MODIFYING_ENZYMES	REACTOME_COLLAGEN_BIOSYNTHESIS_AND_MODIFYING_ENZYMES	67	-0.325183	-1.26942	0.0965251	0.24788	0.18346	4857	tags=30%, list=14%, signal=26%	COL4A2/COL4A6/ADAMTS2/COL1A1/COL5A1/COL18A1/COL22A1/COL4A1/P4HA3/COL15A1/TLL1/COL12A1/COL3A1/COL8A1/COL4A3/COL4A4/COL14A1/COL6A6/COL10A1/COL25A1
REACTOME_VISUAL_PHOTOTRANSDUCTION	REACTOME_VISUAL_PHOTOTRANSDUCTION	99	0.358248	1.26559	0.0967337	0.248147	0.183658	4634	tags=22%, list=13%, signal=19%	CLPS/PNLIP/GUCY2F/RDH8/RBP2/GUCY2D/GNGT1/APOA2/RBP3/GPC2/AKR1B10/GPC3/GRK7/SAG/HSD17B1/STRA6/PDE6A/RHO/LRP8/OPN1SW/RGS9BP/LRP2
REACTOME_FORMATION_OF_THE_EARLY_ELONGATION_COMPLEX	REACTOME_FORMATION_OF_THE_EARLY_ELONGATION_COMPLEX	33	0.455902	1.33535	0.0970588	0.248713	0.184077	9943	tags=48%, list=28%, signal=35%	POLR2J/POLR2I/NELFE/POLR2H/POLR2K/POLR2L/GTF2H5/POLR2G/POLR2F/ERCC2/CDK7/NELFB/GTF2F2/NCBP2/SUPT5H/NELFCD
REACTOME_POTASSIUM_CHANNELS	REACTOME_POTASSIUM_CHANNELS	102	0.357517	1.26397	0.0974684	0.248812	0.184151	5783	tags=30%, list=16%, signal=26%	KCNC2/KCNV1/KCNB2/ABCC8/KCNH2/KCNJ9/GNG4/KCNA4/GNG8/KCNK10/KCNN1/GNGT1/KCNJ11/KCNQ4/HCN4/KCNG1/KCNH3/KCNK7/GNG13/KCNF1/GNB3/KCNH4/KCNMB4/HCN3/KCNK3/KCNN4/KCNK9/HCN1/KCNA1/KCNMB3/KCNH1
REACTOME_NICOTINAMIDE_SALVAGING	REACTOME_NICOTINAMIDE_SALVAGING	19	-0.473041	-1.40395	0.097561	0.248812	0.184151	6078	tags=68%, list=17%, signal=57%	PARP16/PARP6/NAXD/PARP14/PARP8/PARP4/PARP9/SLC22A13/NAMPT/NUDT12/CYP8B1/PTGS2/PTGIS
REACTOME_ACTIVATION_OF_THE_TFAP2_AP_2_FAMILY_OF_TRANSCRIPTION_FACTORS	REACTOME_ACTIVATION_OF_THE_TFAP2_AP_2_FAMILY_OF_TRANSCRIPTION_FACTORS	12	0.594242	1.39323	0.0976431	0.248812	0.184151	2220	tags=33%, list=6%, signal=31%	TFAP2B/TFAP2E/TFAP2C/CITED4
REACTOME_RNA_POLYMERASE_III_TRANSCRIPTION_INITIATION_FROM_TYPE_1_PROMOTER	REACTOME_RNA_POLYMERASE_III_TRANSCRIPTION_INITIATION_FROM_TYPE_1_PROMOTER	28	0.471413	1.32957	0.0978916	0.248812	0.184151	6736	tags=36%, list=19%, signal=29%	POLR2H/POLR3C/GTF3C6/POLR2K/POLR2L/GTF3A/POLR3K/POLR1C/GTF3C5/POLR2F
BIOCARTA_CBL_PATHWAY	BIOCARTA_CBL_PATHWAY	12	-0.534906	-1.41728	0.0980392	0.248812	0.184151	6996	tags=67%, list=20%, signal=54%	PDGFRA/SH3KBP1/SH3GLB1/CBL/PRKCB/PRKCA/MET/EGFR
PID_FAS_PATHWAY	PID_FAS_PATHWAY	38	-0.36782	-1.29472	0.0980392	0.248812	0.184151	10562	tags=58%, list=29%, signal=41%	CASP3/CASP8/MAPK14/RIPK1/SMPD1/FAIM2/PIK3R3/MAPK8/CHUK/CFLAR/AKT1/CLTC/RFC1/CASP10/PIK3CB/BIRC2/MAP3K1/MAP2K6/PIK3CA/PDPK1/FAS/PIK3R1
PID_P38_ALPHA_BETA_DOWNSTREAM_PATHWAY	PID_P38_ALPHA_BETA_DOWNSTREAM_PATHWAY	38	-0.367652	-1.29412	0.0980392	0.248812	0.184151	3676	tags=24%, list=10%, signal=21%	PPARGC1A/RPS6KA5/PLA2G4A/MITF/MEF2A/HBP1/NOS2/PTGS2/ESR1
REACTOME_BUTYROPHILIN_BTN_FAMILY_INTERACTIONS	REACTOME_BUTYROPHILIN_BTN_FAMILY_INTERACTIONS	12	-0.537448	-1.42402	0.0980392	0.248812	0.184151	4479	tags=33%, list=13%, signal=29%	BTN3A3/BTNL9/PPL/XDH
REACTOME_HYALURONAN_UPTAKE_AND_DEGRADATION	REACTOME_HYALURONAN_UPTAKE_AND_DEGRADATION	12	-0.540135	-1.43114	0.0980392	0.248812	0.184151	6057	tags=33%, list=17%, signal=28%	HYAL1/CHP1/LYVE1/STAB2
WP_ARYL_HYDROCARBON_RECEPTOR_PATHWAY	WP_ARYL_HYDROCARBON_RECEPTOR_PATHWAY	46	-0.361838	-1.31249	0.0986395	0.250069	0.18508	6233	tags=41%, list=17%, signal=34%	CDKN1B/IL12B/TNF/IGFBP1/NCOA1/NFE2L2/CES3/AHR/EP300/POLK/CYP1A1/CYP1B1/EGFR/MYOF/UGT1A1/UGT1A4/GSTA2/UGT1A3/CYP1A2
REACTOME_REGULATION_OF_BETA_CELL_DEVELOPMENT	REACTOME_REGULATION_OF_BETA_CELL_DEVELOPMENT	42	0.423544	1.30807	0.0992806	0.251188	0.185908	5795	tags=31%, list=16%, signal=26%	NKX2-2/INS/PTF1A/NKX6-1/NEUROD1/PDX1/PAX4/PAX6/KAT2A/NEUROG3/FOXA3/RFX6/ONECUT3
PID_PI3K_PLC_TRK_PATHWAY	PID_PI3K_PLC_TRK_PATHWAY	36	-0.376525	-1.29306	0.0993377	0.251188	0.185908	4354	tags=50%, list=12%, signal=44%	PLCG1/GSK3B/NTRK1/CREB1/AKT1/YWHAQ/KRAS/TRPC3/SOS1/PIK3CA/CCND1/PDPK1/EGR1/CAMK4/GAB1/TRPV1/PIK3R1/EPB41L1
KEGG_HOMOLOGOUS_RECOMBINATION	KEGG_HOMOLOGOUS_RECOMBINATION	28	0.469637	1.32457	0.0993976	0.251188	0.185908	8995	tags=43%, list=25%, signal=32%	EME1/SEM1/BLM/RAD54L/RAD54B/RAD51/POLD1/SSBP1/XRCC3/XRCC2/RPA4/POLD2
REACTOME_FLT3_SIGNALING	REACTOME_FLT3_SIGNALING	292	-0.236031	-1.13225	0.1	0.252442	0.186837	6126	tags=26%, list=17%, signal=21%	SPRED2/SYNGAP1/SPTB/KBTBD7/PIK3C3/MAP2K1/DLG1/CUL3/STAT5B/PPP2CB/ARRB1/PSMC1/ABHD17B/FGFR2/PDGFRB/CAMK2D/FGF16/NF1/IRS2/FLT3/PPP2R1B/PTPN3/NCAM1/FN1/DLG3/SOS1/SPTBN1/IL5RA/JAK2/GRIN2B/RASGRF2/PIK3CA/PTPN11/PDPK1/FYN/IQGAP1/FRS2/PAQR3/NRG3/JAK1/CSF2RB/IRS1/AREG/MET/FGF18/PIK3R4/DUSP16/RASGRP1/EREG/DUSP1/GAB1/RET/RASGRF1/EGFR/IL2RB/RASA1/FGF2/VWF/RAPGEF2/PDE3B/FGF20/TGFA/ERBB2/PIK3R1/KIT/FGF7/CAMK2…
ST_DIFFERENTIATION_PATHWAY_IN_PC12_CELLS	ST_DIFFERENTIATION_PATHWAY_IN_PC12_CELLS	47	-0.361697	-1.31801	0.100346	0.253046	0.187284	8467	tags=49%, list=24%, signal=37%	MAPK8/ATF1/NTRK1/CREB1/BRAF/AKT1/MAPK1/RAPGEF1/MAP1B/EGR4/MAPK8IP1/GNAQ/CREB5/CREBBP/PIK3CA/PTPN11/FRS2/EGR1/TH/PIK3C2G/PIK3R1/EGR2/EGR3
REACTOME_TRANSCRIPTIONAL_REGULATION_BY_THE_AP_2_TFAP2_FAMILY_OF_TRANSCRIPTION_FACTORS	REACTOME_TRANSCRIPTIONAL_REGULATION_BY_THE_AP_2_TFAP2_FAMILY_OF_TRANSCRIPTION_FACTORS	38	0.433369	1.31535	0.100575	0.253355	0.187512	2220	tags=18%, list=6%, signal=17%	CGA/TFAP2B/PITX2/MYBL2/TFAP2E/TFAP2C/CITED4
REACTOME_DOWNSTREAM_SIGNALING_EVENTS_OF_B_CELL_RECEPTOR_BCR_	REACTOME_DOWNSTREAM_SIGNALING_EVENTS_OF_B_CELL_RECEPTOR_BCR_	81	0.377888	1.29576	0.101316	0.254696	0.188505	10262	tags=40%, list=29%, signal=28%	PSMD4/PSMB4/HRAS/PSMB3/SEM1/UBA52/NFKBIE/PSMB6/PSMB9/NFKBIB/PPIA/RPS27A/PSMB8/PSME2/PSMB1/FKBP1A/PSMD13/PSMB7/PSMC4/PSMC5/PSMC3/PSMD14/PSMA4/PSMB2/PSMB5/PSMA7/PSMD8/PSMA3/PSMA5/PSMA1/PSMB11/PSMA2
WP_FBXL10_ENHANCEMENT_OF_MAPERK_SIGNALING_IN_DIFFUSE_LARGE_BCELL_LYMPHOMA	WP_FBXL10_ENHANCEMENT_OF_MAPERK_SIGNALING_IN_DIFFUSE_LARGE_BCELL_LYMPHOMA	32	0.45807	1.33421	0.101322	0.254696	0.188505	10133	tags=50%, list=28%, signal=36%	H3C7/H3C11/H3C14/H3C4/H2AX/H2AB1/MACROH2A2/H2AJ/MAPK3/H2AZ1/EZH2/PCGF1/MACROH2A1/H3-3A/EED/RNF2
WP_INTERFERON_TYPE_I_SIGNALING_PATHWAYS	WP_INTERFERON_TYPE_I_SIGNALING_PATHWAYS	54	-0.342097	-1.28125	0.101449	0.254748	0.188544	10914	tags=67%, list=30%, signal=46%	MAP2K3/RPTOR/CRK/TYK2/GAB2/MAPK14/RAP1A/LCK/STAT3/IRF9/IFNAR2/STAT1/RPS6KB1/STAT4/CREB1/SOCS3/PDCD4/STAT2/RAPGEF1/CBL/EIF4E/EIF4B/PIAS1/MAP3K1/IFNAR1/IRS2/MAP2K6/PTPN11/FYN/MTOR/RPS6KA5/JAK1/IRS1/REL/PIK3R1/PTPRC
REACTOME_RNA_POLYMERASE_III_CHAIN_ELONGATION	REACTOME_RNA_POLYMERASE_III_CHAIN_ELONGATION	18	0.535401	1.36953	0.102073	0.256045	0.189503	10876	tags=56%, list=30%, signal=39%	POLR2H/POLR3C/POLR2K/POLR2L/POLR3K/POLR1C/POLR2F/POLR3G/POLR1D/POLR2E
REACTOME_POTENTIAL_THERAPEUTICS_FOR_SARS	REACTOME_POTENTIAL_THERAPEUTICS_FOR_SARS	37	-0.372985	-1.28907	0.10231	0.256369	0.189743	4362	tags=27%, list=12%, signal=24%	IL1RAP/JAK2/NR3C1/JAK1/S1PR1/CYSLTR1/ROCK1/ITGB1/IL1R1/ITGA4
REACTOME_DOWNREGULATION_OF_ERBB2_SIGNALING	REACTOME_DOWNREGULATION_OF_ERBB2_SIGNALING	29	-0.407528	-1.33331	0.102941	0.257407	0.190512	5364	tags=31%, list=15%, signal=26%	ERBIN/USP8/CUL5/AKT3/NRG3/EREG/EGFR/ERBB2/NRG1
REACTOME_TIGHT_JUNCTION_INTERACTIONS	REACTOME_TIGHT_JUNCTION_INTERACTIONS	29	-0.404797	-1.32437	0.102941	0.257407	0.190512	8220	tags=45%, list=23%, signal=35%	CLDN8/CLDN2/CLDN6/PATJ/CLDN14/PARD6B/CLDN12/CLDN1/MPP5/CLDN19/CLDN20/CLDN10/CLDN16
REACTOME_INTERLEUKIN_6_FAMILY_SIGNALING	REACTOME_INTERLEUKIN_6_FAMILY_SIGNALING	24	-0.423672	-1.33027	0.103152	0.257449	0.190543	3983	tags=67%, list=11%, signal=59%	TYK2/CLCF1/IL6R/STAT3/IL6/STAT1/SOCS3/CNTFR/CBL/JAK2/PTPN11/CNTF/JAK1/IL6ST/LIFR/IL31
REACTOME_IL_6_TYPE_CYTOKINE_RECEPTOR_LIGAND_INTERACTIONS	REACTOME_IL_6_TYPE_CYTOKINE_RECEPTOR_LIGAND_INTERACTIONS	17	-0.475064	-1.35113	0.103175	0.257449	0.190543	3983	tags=35%, list=11%, signal=31%	JAK2/CNTF/JAK1/IL6ST/LIFR/IL31
REACTOME_EGR2_AND_SOX10_MEDIATED_INITIATION_OF_SCHWANN_CELL_MYELINATION	REACTOME_EGR2_AND_SOX10_MEDIATED_INITIATION_OF_SCHWANN_CELL_MYELINATION	28	-0.410253	-1.33003	0.10355	0.258116	0.191036	4579	tags=39%, list=13%, signal=34%	UTRN/HMGCR/MBP/YAP1/MAG/TEAD1/POU3F1/CYP51A1/EGR2/SCD5/LAMA2
REACTOME_WNT_LIGAND_BIOGENESIS_AND_TRAFFICKING	REACTOME_WNT_LIGAND_BIOGENESIS_AND_TRAFFICKING	26	-0.412439	-1.31294	0.104046	0.258838	0.191571	1114	tags=19%, list=3%, signal=19%	WNT5B/WNT2/WNT8B/WNT9B/WNT7A
REACTOME_FORMATION_OF_TC_NER_PRE_INCISION_COMPLEX	REACTOME_FORMATION_OF_TC_NER_PRE_INCISION_COMPLEX	53	0.408197	1.31637	0.10411	0.258838	0.191571	10876	tags=45%, list=30%, signal=32%	POLR2J/POLR2I/POLR2H/UBA52/POLR2K/RBX1/ISY1/POLR2L/RPS27A/GTF2H5/POLR2G/POLR2F/COPS5/COPS7B/COPS6/ERCC2/CDK7/GPS1/PPIE/XAB2/PRPF19/HMGN1/COPS3/POLR2E
KEGG_CHRONIC_MYELOID_LEUKEMIA	KEGG_CHRONIC_MYELOID_LEUKEMIA	73	-0.324093	-1.27063	0.104167	0.258838	0.191571	9247	tags=48%, list=26%, signal=36%	NRAS/TGFB2/TGFBR1/PIK3R3/CDKN1A/PIK3R5/ARAF/CHUK/CBLB/SMAD3/BRAF/AKT1/SMAD4/MAPK1/CBL/PIK3CB/KRAS/TGFB3/CDKN1B/MAP2K1/STAT5B/RB1/MDM2/NFKB1/CDK6/AKT3/SOS1/PIK3CA/CCND1/PTPN11/SOS2/TGFBR2/SHC4/PIK3R1/PIK3CG
REACTOME_FOXO_MEDIATED_TRANSCRIPTION	REACTOME_FOXO_MEDIATED_TRANSCRIPTION	66	-0.329333	-1.27234	0.104651	0.259695	0.192205	4785	tags=50%, list=13%, signal=43%	CAV1/AKT1/SMAD4/ATXN3/SIN3A/YWHAQ/FOXO4/CDKN1B/IGFBP1/BTG1/MSTN/CITED2/TXNIP/CREBBP/SIRT1/AKT3/CCNG2/KLF4/PPARGC1A/EP300/NR3C1/BCL2L11/FOXO1/GADD45A/KAT2B/G6PC/PINK1/CAT/PCK1/RBL2/ABCA6/TRIM63/PLXNA4
KEGG_PYRUVATE_METABOLISM	KEGG_PYRUVATE_METABOLISM	40	-0.368639	-1.30132	0.10473	0.259695	0.192205	4926	tags=52%, list=14%, signal=45%	ME2/ACSS2/ACYP2/MDH1/PKLR/ALDH9A1/LDHC/ALDH3A2/LDHD/PC/ALDH7A1/GRHPR/DLD/ALDH2/ALDH1B1/ACAT1/PCK2/ACACB/LDHAL6B/PCK1/ACOT12
REACTOME_DOWNSTREAM_SIGNALING_OF_ACTIVATED_FGFR4	REACTOME_DOWNSTREAM_SIGNALING_OF_ACTIVATED_FGFR4	27	-0.41329	-1.32666	0.104956	0.259856	0.192324	5076	tags=41%, list=14%, signal=35%	FGF16/SOS1/PIK3CA/PTPN11/FRS2/FGF18/GAB1/FGF2/FGF20/PIK3R1/FGF23
REACTOME_ASSEMBLY_OF_COLLAGEN_FIBRILS_AND_OTHER_MULTIMERIC_STRUCTURES	REACTOME_ASSEMBLY_OF_COLLAGEN_FIBRILS_AND_OTHER_MULTIMERIC_STRUCTURES	61	-0.333171	-1.27544	0.105263	0.259856	0.192324	4965	tags=36%, list=14%, signal=31%	PXDN/COL4A2/COL4A6/COL1A1/MMP20/COL5A1/COL18A1/COL4A1/DST/LAMB3/LAMC2/COL15A1/TLL1/COL12A1/COL3A1/COL8A1/COL4A3/LAMA3/COL4A4/COL14A1/COL6A6/COL10A1
REACTOME_CELL_CELL_JUNCTION_ORGANIZATION	REACTOME_CELL_CELL_JUNCTION_ORGANIZATION	64	-0.329201	-1.2688	0.105263	0.259856	0.192324	6292	tags=38%, list=18%, signal=31%	CLDN14/PARD6B/CADM2/CTNNB1/AFDN/CLDN12/CLDN1/CDH6/CADM1/CDH2/CDH12/MPP5/CDH13/CADM3/CLDN19/CDH11/CDH5/CTNND1/NECTIN3/CLDN20/CDH1/CDH17/CLDN10/CLDN16
REACTOME_SELECTIVE_AUTOPHAGY	REACTOME_SELECTIVE_AUTOPHAGY	81	0.376685	1.29163	0.105263	0.259856	0.192324	7136	tags=32%, list=20%, signal=26%	TUBA3E/TUBA3C/TUBB8/CETN1/TUBAL3/TUBA4B/TOMM40/TUBA4A/TUBB8B/HSF1/SQSTM1/TUBB4B/CSNK2B/UBA52/DYNLL1/TOMM5/TUBA3D/RPS27A/TUBB4A/MTERF3/TUBA1C/PRKAG3/TUBB2B/TUBA1A/TOMM20/SRC
PID_AURORA_A_PATHWAY	PID_AURORA_A_PATHWAY	31	0.461226	1.33603	0.105341	0.259856	0.192324	7636	tags=42%, list=21%, signal=33%	AURKB/BIRC5/CENPA/TACC3/CPEB1/OAZ1/TPX2/AURKA/AURKAIP1/DLGAP5/GIT1/CDC25B/RAN
REACTOME_NR1H3_NR1H2_REGULATE_GENE_EXPRESSION_LINKED_TO_CHOLESTEROL_TRANSPORT_AND_EFFLUX	REACTOME_NR1H3_NR1H2_REGULATE_GENE_EXPRESSION_LINKED_TO_CHOLESTEROL_TRANSPORT_AND_EFFLUX	37	-0.366688	-1.26731	0.105611	0.260251	0.192616	7025	tags=41%, list=20%, signal=33%	KDM3A/CETP/AGO4/KDM1B/TNRC6C/KDM4A/NCOA1/TBL1X/TNRC6A/TNRC6B/EP300/ABCA1/NCOR1/ABCG5/ABCG8
REACTOME_REGULATION_OF_RUNX1_EXPRESSION_AND_ACTIVITY	REACTOME_REGULATION_OF_RUNX1_EXPRESSION_AND_ACTIVITY	17	-0.473909	-1.34785	0.10582	0.260497	0.192799	8642	tags=53%, list=24%, signal=40%	AGO1/AGO3/AGO4/TNRC6C/CDK6/TNRC6A/TNRC6B/CCND1/PTPN11
REACTOME_INTRA_GOLGI_TRAFFIC	REACTOME_INTRA_GOLGI_TRAFFIC	44	-0.356685	-1.28087	0.10596	0.260572	0.192854	6131	tags=39%, list=17%, signal=32%	GOLGA5/CUX1/CYTH3/COG6/MAN2A2/COG5/RAB39A/RAB33B/RIC1/RAB30/MAN1A2/RAB36/MAN2A1/MAN1A1/GOLIM4/TRIP11/MAN1C1
KEGG_NEUROACTIVE_LIGAND_RECEPTOR_INTERACTION	KEGG_NEUROACTIVE_LIGAND_RECEPTOR_INTERACTION	270	0.307914	1.20481	0.106622	0.261754	0.193729	6651	tags=32%, list=19%, signal=26%	PRSS1/PRSS2/CGA/PRL/GRID2/KISS1R/CHRNB3/GRIK2/TACR3/MTNR1B/CCKBR/HTR2C/GABRA3/PRLHR/LPAR3/CHRNA1/P2RX5/ADORA1/LEP/LHB/MCHR2/GRM1/ADRA1D/GRIA2/CHRM1/HCRTR2/GRM3/GH1/OPRK1/CNR1/CHRNA9/DRD2/GHRHR/TAAR6/P2RY6/GABRB2/NPFFR2/TAAR8/TACR2/GPR35/TSPO/GIPR/HTR5A/CHRND/SSTR2/GABRR1/LPAR2/SSTR5/OPRD1/GRM4/GRIA1/GRIK5/ADRA2C/GHSR/GABRB1/GABRA5/SSTR3/GRIN2D/DRD4/S1PR2/AVPR1B/P2RX6/P2RY11/CRHR1/TAAR9/GABRG2/P2R…
KEGG_BASAL_CELL_CARCINOMA	KEGG_BASAL_CELL_CARCINOMA	55	-0.341366	-1.27983	0.106762	0.261754	0.193729	7467	tags=42%, list=21%, signal=33%	WNT3/FZD5/AXIN2/PTCH2/FZD3/SHH/BMP2/BMP4/WNT16/CTNNB1/FZD1/WNT11/FZD4/FZD8/APC/PTCH1/GLI2/WNT5B/WNT2/WNT8B/WNT9B/HHIP/WNT7A
REACTOME_TRYPTOPHAN_CATABOLISM	REACTOME_TRYPTOPHAN_CATABOLISM	14	-0.504983	-1.36302	0.106771	0.261754	0.193729	6927	tags=57%, list=19%, signal=46%	KYAT3/SLC36A4/HAAO/KMO/ACMSD/TDO2/AADAT/IDO2
WP_PATHWAYS_OF_NUCLEIC_ACID_METABOLISM_AND_INNATE_IMMUNE_SENSING	WP_PATHWAYS_OF_NUCLEIC_ACID_METABOLISM_AND_INNATE_IMMUNE_SENSING	15	0.556541	1.36494	0.106908	0.26182	0.193777	7261	tags=47%, list=20%, signal=37%	RNASET2/RNASEH2A/IRF3/RNASEH2C/IFNB1/RNASEH2B/CGAS
REACTOME_SYNTHESIS_OF_PIPS_AT_THE_LATE_ENDOSOME_MEMBRANE	REACTOME_SYNTHESIS_OF_PIPS_AT_THE_LATE_ENDOSOME_MEMBRANE	11	-0.550556	-1.4164	0.107656	0.263297	0.194871	6049	tags=64%, list=17%, signal=53%	PIK3C3/MTMR4/MTMR9/PIKFYVE/PIK3R4/MTM1/PIK3C2A
REACTOME_E2F_MEDIATED_REGULATION_OF_DNA_REPLICATION	REACTOME_E2F_MEDIATED_REGULATION_OF_DNA_REPLICATION	22	0.501083	1.3434	0.107813	0.263297	0.194871	7231	tags=36%, list=20%, signal=29%	ORC6/CDK1/CCNB1/PPP2R1A/E2F1/ORC1/PPP2R3B/POLA2
WP_MAPK_AND_NFKB_SIGNALLING_PATHWAYS_INHIBITED_BY_YERSINIA_YOPJ	WP_MAPK_AND_NFKB_SIGNALLING_PATHWAYS_INHIBITED_BY_YERSINIA_YOPJ	12	-0.530239	-1.40492	0.107843	0.263297	0.194871	8345	tags=58%, list=23%, signal=45%	CHUK/MAPK1/MAP3K1/TRAF6/MAP3K14/NFKB1/MAP2K6
REACTOME_ELEVATION_OF_CYTOSOLIC_CA2_LEVELS	REACTOME_ELEVATION_OF_CYTOSOLIC_CA2_LEVELS	16	-0.482133	-1.3586	0.108247	0.264013	0.1954	5457	tags=44%, list=15%, signal=37%	TRPC6/P2RX1/TRPC3/ITPR2/ITPR1/P2RX3/P2RX2
WP_SMALL_CELL_LUNG_CANCER	WP_SMALL_CELL_LUNG_CANCER	96	-0.306415	-1.23968	0.108491	0.264335	0.195639	6630	tags=39%, list=19%, signal=31%	ITGAV/LAMB2/RARB/PIK3CB/BIRC2/ITGA6/CCNE1/CDKN1B/TRAF6/RB1/GADD45B/COL4A2/COL4A6/NFKB1/CDK6/FN1/AKT3/ITGA2/PIK3CA/CCND1/POLK/DDB2/COL4A1/BCL2/APAF1/LAMB3/LAMC2/LAMC3/GADD45A/ITGB1/PIK3R1/COL4A3/LAMA3/NOS2/COL4A4/LAMA2/PTGS2
BIOCARTA_PS1_PATHWAY	BIOCARTA_PS1_PATHWAY	14	-0.50364	-1.35939	0.109375	0.266169	0.196997	9450	tags=71%, list=26%, signal=53%	NOTCH1/BTRC/PSEN1/GSK3B/DLL1/CTNNB1/FZD1/ADAM17/HNF1A/APC
PID_REELIN_PATHWAY	PID_REELIN_PATHWAY	28	-0.405661	-1.31514	0.109467	0.266169	0.196997	8467	tags=50%, list=24%, signal=38%	PAFAH1B1/MAPK8/GSK3B/AKT1/RAPGEF1/CBL/MAP1B/GRIN2B/PIK3CA/FYN/DAB1/ITGB1/PIK3R1/GRIN2A
KEGG_FOLATE_BIOSYNTHESIS	KEGG_FOLATE_BIOSYNTHESIS	11	0.599445	1.36452	0.109589	0.266193	0.197014	5428	tags=45%, list=15%, signal=39%	ALPG/ALPI/ALPP/GGH/ALPL
KEGG_SELENOAMINO_ACID_METABOLISM	KEGG_SELENOAMINO_ACID_METABOLISM	26	-0.408853	-1.30153	0.109827	0.266498	0.19724	7086	tags=38%, list=20%, signal=31%	TRMT11/AHCYL1/MAT2A/GGT5/MAT2B/CTH/MAT1A/CBS/AHCYL2/PAPSS2
REACTOME_NEURONAL_SYSTEM	REACTOME_NEURONAL_SYSTEM	409	0.290288	1.16525	0.110151	0.267013	0.197621	6979	tags=29%, list=19%, signal=24%	TUBA3E/SLITRK1/TUBA3C/KCNC2/KCNV1/PPFIA4/SLC6A3/SLC18A3/CHRNB3/GRIK2/KCNB2/ABCC8/KCNH2/GABRA3/KCNJ9/GNG4/CACNG4/HTR3E/CHRNA1/TUBB8/KCNA4/ACTN2/GRM1/SLC1A7/GAD1/GRIA2/TUBAL3/ERBB4/GNG8/SLC1A6/ADCY8/NEFL/CHRNA9/KCNK10/KCNN1/GABRB2/CACNA2D3/PRKCG/TUBA4B/GNGT1/CACNA1E/HOMER3/HRAS/HTR3B/KCNJ11/GAD2/KCNQ4/HCN4/KCNG1/KCNH3/SHARPIN/CHRND/KCNK7/BEGAIN/TUBA4A/LIN7B/LRFN2/HTR3A/TUBB8B/GABRR1/CACNA1B/STX1A/G…
REACTOME_SEROTONIN_RECEPTORS	REACTOME_SEROTONIN_RECEPTORS	12	-0.526257	-1.39437	0.110294	0.267087	0.197676	3069	tags=50%, list=9%, signal=46%	HTR1B/HTR1E/HTR7/HTR2B/HTR4/HTR1D
WP_VITAMIN_B12_METABOLISM	WP_VITAMIN_B12_METABOLISM	51	-0.345726	-1.26352	0.110701	0.267702	0.198131	8993	tags=55%, list=25%, signal=41%	IL6/SERPINA3/F7/F2/MCEE/IL1B/CUBN/HBB/INSR/MTRR/TCN1/TNF/SAA3P/SAA2/MTR/CTH/NFKB1/MAT1A/MPO/ABCA1/CBS/LDLR/APOB/ALB/PLAT/CCL2/MMUT/PLG
PID_WNT_SIGNALING_PATHWAY	PID_WNT_SIGNALING_PATHWAY	27	0.468943	1.31497	0.110774	0.267702	0.198131	1301	tags=22%, list=4%, signal=21%	WNT3A/WIF1/FZD9/CTHRC1/DKK1/FZD2
WP_PREIMPLANTATION_EMBRYO	WP_PREIMPLANTATION_EMBRYO	59	0.397278	1.29776	0.110961	0.267702	0.198131	5082	tags=29%, list=14%, signal=25%	DLX2/TFAP2B/CDX2/SIX3/FOXD1/NLRP5/DPPA3/DDIT3/CELF3/HMGA1/ZFP42/SOX2/MACROH2A2/TEAD4/SOX11/ZAR1/NANOGNB
REACTOME_METABOLISM_OF_WATER_SOLUBLE_VITAMINS_AND_COFACTORS	REACTOME_METABOLISM_OF_WATER_SOLUBLE_VITAMINS_AND_COFACTORS	123	-0.284416	-1.20817	0.111111	0.267702	0.198131	6184	tags=35%, list=17%, signal=29%	TCN1/PARP8/PC/MOCS1/PARP4/MTR/PARP9/AASDHPPT/LMBRD1/SLC23A1/DHFR2/PCCA/SLC22A13/NAMPT/SHMT1/HLCS/ALDH1L2/CYB5A/AMN/NT5E/NADK2/BTD/MCCC2/ENPP1/PANK3/MCCC1/NUDT12/SLC19A3/DHFR/THTPA/GPHN/ACACB/PNPO/NMNAT2/SLC23A2/AOX1/VNN1/MMUT/PANK1/MTHFD1/CYP8B1/PTGS2/PTGIS
WP_WNT_SIGNALING_PATHWAY_AND_PLURIPOTENCY	WP_WNT_SIGNALING_PATHWAY_AND_PLURIPOTENCY	101	-0.297916	-1.22603	0.111111	0.267702	0.198131	7467	tags=39%, list=21%, signal=31%	WNT3/FBXW2/PPP2R5E/FZD5/PPP2R2A/AXIN2/FZD3/PRKCQ/PRKCZ/PRKCB/PPP2CB/WNT16/CTNNB1/PRKCA/NKD1/FZD1/PPP2R1B/PPP2R3A/PRKD1/WNT11/CREBBP/ZBTB33/CCND1/LRP5/EP300/PRKCE/FZD4/FZD8/LDLR/PPP2R2B/APC/PRKCH/CTNND1/LRP6/WNT5B/LRRK2/WNT2/WNT9B/WNT7A
WP_INTEGRATED_BREAST_CANCER_PATHWAY	WP_INTEGRATED_BREAST_CANCER_PATHWAY	152	-0.270963	-1.17542	0.111765	0.26882	0.198959	9008	tags=43%, list=25%, signal=33%	FOSL2/NAB1/TGFBR1/ZMIZ1/FILIP1/ATR/PPP4R3A/IMPA1/RASGRP3/ARAF/STAT1/CHUK/ATF1/CCNB1IP1/CREB1/DCAKD/MAP3K13/PTEN/BRAF/AKT1/SMAD4/USP15/MAPK1/MAP3K7CL/SP1/ZNF655/PPP4R3B/KRAS/HMGCR/PIAS1/WEE1/CTNNB1/RB1/RAD50/MDM2/NF1/FER/SMAD7/USP38/USP16/NFKB1/AHR/SIRT1/RALGAPA1/SMAD6/ATM/BACH1/CCND1/EP300/MTOR/JAK1/BCL2/IRS1/DHTKD1/BMPR2/MYCBP2/FOXO1/EGFR/GADD45A/TGFBR2/HIPK2/CDH1/SMAD1/AR/ESR1/EDAR
WP_RESISTIN_AS_A_REGULATOR_OF_INFLAMMATION	WP_RESISTIN_AS_A_REGULATOR_OF_INFLAMMATION	33	-0.380592	-1.28071	0.111801	0.26882	0.198959	8993	tags=52%, list=25%, signal=39%	AKT2/IL6/PLCG1/PLCE1/CHUK/AKT1/MAPK1/PIK3CB/IL12B/PLCB4/TNF/NFKB1/AKT3/PIK3CA/PLCG2/ITPR1/PIK3CG
WP_MAMMARY_GLAND_DEVELOPMENT_PATHWAY_EMBRYONIC_DEVELOPMENT_STAGE_1_OF_4	WP_MAMMARY_GLAND_DEVELOPMENT_PATHWAY_EMBRYONIC_DEVELOPMENT_STAGE_1_OF_4	18	-0.468149	-1.36663	0.112	0.269026	0.199111	6346	tags=50%, list=18%, signal=41%	AKT1/ITGA6/TNF/CCND1/NRG3/ZEB2/ITGB1/CDH1/SFRP1
ST_WNT_CA2_CYCLIC_GMP_PATHWAY	ST_WNT_CA2_CYCLIC_GMP_PATHWAY	20	-0.450646	-1.36197	0.112299	0.269473	0.199442	6886	tags=50%, list=19%, signal=40%	ITPR3/PDE6C/ITPKB/CAMK2D/TF/SLC6A13/ITPR2/ITPR1/CAMK2B/NFAT5
REACTOME_A_TETRASACCHARIDE_LINKER_SEQUENCE_IS_REQUIRED_FOR_GAG_SYNTHESIS	REACTOME_A_TETRASACCHARIDE_LINKER_SEQUENCE_IS_REQUIRED_FOR_GAG_SYNTHESIS	26	-0.407244	-1.29641	0.112717	0.270033	0.199856	2666	tags=35%, list=7%, signal=32%	GPC4/GPC5/B3GAT2/XYLT1/NCAN/VCAN/HSPG2/DCN/B3GAT1
WP_INFLAMMATORY_RESPONSE_PATHWAY	WP_INFLAMMATORY_RESPONSE_PATHWAY	30	-0.407496	-1.3371	0.11276	0.270033	0.199856	4656	tags=63%, list=13%, signal=55%	TNFRSF1B/IL4R/CD40/TNFRSF1A/LAMB1/VTN/LCK/CD80/LAMB2/COL1A2/COL1A1/FN1/CD28/IL5RA/CD40LG/LAMC2/COL3A1/IL2RB/THBS1
REACTOME_GASTRIN_CREB_SIGNALLING_PATHWAY_VIA_PKC_AND_MAPK	REACTOME_GASTRIN_CREB_SIGNALLING_PATHWAY_VIA_PKC_AND_MAPK	18	0.525174	1.34337	0.113238	0.270905	0.200501	2001	tags=22%, list=6%, signal=21%	GAST/CCKBR/HRAS/MMP3
WP_NCRNAS_INVOLVED_IN_STAT3_SIGNALING_IN_HEPATOCELLULAR_CARCINOMA	WP_NCRNAS_INVOLVED_IN_STAT3_SIGNALING_IN_HEPATOCELLULAR_CARCINOMA	17	-0.46903	-1.33397	0.113757	0.271873	0.201218	4610	tags=35%, list=13%, signal=31%	NFKB1/JAK2/ZEB1/JAK1/IL6ST/UCA1
KEGG_ACUTE_MYELOID_LEUKEMIA	KEGG_ACUTE_MYELOID_LEUKEMIA	57	-0.338924	-1.27599	0.113971	0.272071	0.201365	9602	tags=51%, list=27%, signal=37%	AKT2/STAT3/NRAS/TCF7L2/PIK3R3/PIK3R5/ARAF/CHUK/RPS6KB1/BRAF/AKT1/MAPK1/PIK3CB/KRAS/MAP2K1/STAT5B/FLT3/NFKB1/AKT3/SOS1/PIK3CA/CCND1/MTOR/ZBTB16/SOS2/RUNX1T1/PIK3R1/KIT/PIK3CG
KEGG_GLIOMA	KEGG_GLIOMA	65	-0.323941	-1.25202	0.114068	0.272071	0.201365	8746	tags=51%, list=24%, signal=38%	PIK3R3/CDKN1A/PLCG1/PIK3R5/ARAF/PTEN/BRAF/AKT1/MAPK1/PIK3CB/KRAS/PRKCB/MAP2K1/RB1/PDGFRB/PRKCA/CAMK2D/MDM2/CALML3/CDK6/AKT3/SOS1/PIK3CA/CCND1/PLCG2/MTOR/SOS2/EGFR/TGFA/SHC4/PIK3R1/CAMK2B/PIK3CG
PID_THROMBIN_PAR4_PATHWAY	PID_THROMBIN_PAR4_PATHWAY	15	-0.488792	-1.36465	0.114213	0.272143	0.201418	10898	tags=67%, list=30%, signal=46%	PLCB2/F2RL3/GNA11/F2/ROCK2/GNA13/GNG2/GNAQ/ROCK1/GNA14
REACTOME_CARGO_TRAFFICKING_TO_THE_PERICILIARY_MEMBRANE	REACTOME_CARGO_TRAFFICKING_TO_THE_PERICILIARY_MEMBRANE	51	-0.343535	-1.25551	0.114391	0.272294	0.20153	8243	tags=39%, list=23%, signal=30%	RAB11FIP3/EXOC1/SMO/RAB3IP/CNGA4/BBS9/ARL13B/BBS4/BBS1/TTC8/EXOC5/CNGA2/RP2/LZTFL1/MCHR1/BBS2/EXOC7/BBS10/PKD2/CYS1
PID_BCR_5PATHWAY	PID_BCR_5PATHWAY	63	-0.32772	-1.25931	0.114815	0.272559	0.201725	8467	tags=37%, list=24%, signal=28%	MAPK8/CHUK/PTEN/BLNK/AKT1/IBTK/MAPK1/PPP3CA/MAP3K1/MAP2K1/TRAF6/NFKB1/SOS1/DAPP1/PIK3CA/PLCG2/PDPK1/RASA1/ETS1/PIK3R1/PTPRC/SH3BP5/FOS
WP_FRAGILE_X_SYNDROME	WP_FRAGILE_X_SYNDROME	120	-0.285285	-1.21333	0.114833	0.272559	0.201725	8570	tags=47%, list=24%, signal=36%	PLCG1/CLTCL1/ARAF/RPS6KB1/KCNC1/CREB1/PTEN/ALDH3A2/EIF4EBP2/BRAF/AKT1/CLTC/EEF1A1/MAPK1/MAP1B/PPP3CA/EIF4E/PRKAR1A/PIK3CB/FMR1/KRAS/GRIP1/EPS8L1/SYNGAP1/MAP2K1/CYFIP1/GRIP2/PRKCA/NF1/APP/SOS1/GRIN2B/ABCD3/SLC16A1/SHANK1/ALDH5A1/PTPN11/DICER1/FYN/MTOR/ARHGAP32/BDNF/GPHN/AKAP5/CAMK4/GAB1/ITPR1/SLC6A1/EPHA4/CPT1A/CAMK2B/ABAT/CYFIP2/NTRK2/GRIN2A/KCND2
REACTOME_METABOLISM_OF_FAT_SOLUBLE_VITAMINS	REACTOME_METABOLISM_OF_FAT_SOLUBLE_VITAMINS	48	0.410387	1.29618	0.114846	0.272559	0.201725	2492	tags=15%, list=7%, signal=14%	CLPS/PNLIP/RBP2/APOA2/GPC2/AKR1B10/GPC3
PID_CDC42_REG_PATHWAY	PID_CDC42_REG_PATHWAY	30	-0.401039	-1.31592	0.115727	0.274154	0.202906	8585	tags=47%, list=24%, signal=36%	BCAR3/PLCG1/RALBP1/MCF2L/ITSN1/ITSN2/FARP2/ARHGEF9/DNMBP/ARHGEF6/DOCK10/APC/DOCK9/DOCK11
PID_AVB3_OPN_PATHWAY	PID_AVB3_OPN_PATHWAY	31	-0.394664	-1.30223	0.115854	0.274154	0.202906	8967	tags=52%, list=25%, signal=39%	GSN/MAPK8/CHUK/ROCK2/MAPK1/ITGAV/MAP3K1/MAP3K14/NFKB1/MMP2/PIK3CA/ILK/PTK2B/PIK3R1/ITGB3/FOS
REACTOME_REGULATION_OF_PYRUVATE_DEHYDROGENASE_PDH_COMPLEX	REACTOME_REGULATION_OF_PYRUVATE_DEHYDROGENASE_PDH_COMPLEX	16	-0.478089	-1.3472	0.115979	0.274154	0.202906	4089	tags=25%, list=11%, signal=22%	DLD/PDK2/GSTZ1/PDK4
REACTOME_SYNTHESIS_OF_PE	REACTOME_SYNTHESIS_OF_PE	13	-0.504556	-1.35926	0.115979	0.274154	0.202906	9213	tags=69%, list=26%, signal=51%	ETNK1/LPIN3/ETNK2/SELENOI/LPIN1/PHOSPHO1/CEPT1/LPIN2/ETNPPL
REACTOME_MAPK_FAMILY_SIGNALING_CASCADES	REACTOME_MAPK_FAMILY_SIGNALING_CASCADES	327	-0.232516	-1.11956	0.116279	0.2744	0.203088	6477	tags=26%, list=18%, signal=22%	KRAS/AGO4/GFRA1/RASA2/MAPK6/SPRED2/SYNGAP1/SPTB/KBTBD7/MAP2K1/DLG1/CUL3/PPP2CB/ARRB1/PSMC1/TNRC6C/ABHD17B/FGFR2/PDGFRB/CAMK2D/FGF16/NF1/IRS2/FLT3/CDC14A/PPP2R1B/PTPN3/NCAM1/MMP2/FN1/DLG3/SOS1/TNRC6A/TNRC6B/SPTBN1/IL5RA/JAK2/GRIN2B/RASGRF2/PIK3CA/PTPN11/FYN/IQGAP1/FRS2/CDC42EP3/MAPK4/PAQR3/NRG3/JAK1/CSF2RB/IRS1/AREG/MET/FGF18/IL6ST/DUSP16/RASGRP1/EREG/DUSP1/KALRN/FOXO1/RET/RASGRF1/EGFR/IL2RB/RASA1…
KEGG_RNA_POLYMERASE	KEGG_RNA_POLYMERASE	29	0.467169	1.32865	0.116314	0.2744	0.203088	11718	tags=59%, list=33%, signal=39%	POLR2J/ZNRD1/POLR2I/POLR2H/POLR3C/POLR2K/POLR2L/POLR3K/POLR1C/POLR2G/POLR2F/POLR3G/POLR1D/POLR2E/POLR1E/POLR2J3/POLR2J2
REACTOME_ESTABLISHMENT_OF_SISTER_CHROMATID_COHESION	REACTOME_ESTABLISHMENT_OF_SISTER_CHROMATID_COHESION	11	-0.543934	-1.39937	0.117225	0.275902	0.2042	9327	tags=73%, list=26%, signal=54%	SMC3/ESCO1/PDS5A/WAPL/PDS5B/STAG2/SMC1A/STAG1
REACTOME_APOPTOSIS_INDUCED_DNA_FRAGMENTATION	REACTOME_APOPTOSIS_INDUCED_DNA_FRAGMENTATION	13	0.56482	1.36406	0.117264	0.275902	0.2042	9437	tags=46%, list=26%, signal=34%	H1-2/H1-1/H1-5/H1-4/HMGB2/H1-3
KEGG_GLYCOSPHINGOLIPID_BIOSYNTHESIS_LACTO_AND_NEOLACTO_SERIES	KEGG_GLYCOSPHINGOLIPID_BIOSYNTHESIS_LACTO_AND_NEOLACTO_SERIES	26	0.466393	1.29597	0.117378	0.275902	0.2042	3048	tags=31%, list=9%, signal=28%	FUT3/FUT1/FUT5/FUT7/FUT2/B4GALT3/B3GALT2/FUT9
REACTOME_CELLULAR_HEXOSE_TRANSPORT	REACTOME_CELLULAR_HEXOSE_TRANSPORT	21	-0.446231	-1.36988	0.117486	0.275902	0.2042	2543	tags=43%, list=7%, signal=40%	SLC2A10/SLC5A9/SLC2A14/SLC2A9/SLC5A2/SLC2A12/SLC5A4/SLC2A2/SLC5A1
KEGG_HEMATOPOIETIC_CELL_LINEAGE	KEGG_HEMATOPOIETIC_CELL_LINEAGE	84	-0.306168	-1.22523	0.117647	0.275902	0.2042	5921	tags=31%, list=17%, signal=26%	TNF/ANPEP/CD1E/CD5/CD36/MME/FLT3/CD3G/CD4/ITGA1/ITGA2/CD1D/IL5RA/CD1A/CSF3/IL9R/GP1BA/CR1/MS4A1/IL1R1/KIT/IL7R/ITGB3/ITGA4/GP5/GYPA
WP_CANNABINOID_RECEPTOR_SIGNALING	WP_CANNABINOID_RECEPTOR_SIGNALING	29	-0.395612	-1.29432	0.117647	0.275902	0.2042	4468	tags=45%, list=12%, signal=39%	MAPK8/FAAH/PRKACB/MAPK1/PRKAR1A/AHR/ADCY7/NAPEPLD/CYP1A1/CYP2C9/ADCY1/CYP2C19/CYP3A4
REACTOME_CLASS_B_2_SECRETIN_FAMILY_RECEPTORS_	REACTOME_CLASS_B_2_SECRETIN_FAMILY_RECEPTORS_	94	0.35495	1.2451	0.117798	0.275983	0.20426	2306	tags=16%, list=6%, signal=15%	WNT3A/CALCA/GCG/UCN2/GIP/WNT6/GNG4/UCN3/FZD9/FZD2/GNG8/GHRHR/GNGT1/GIPR/ADM2
REACTOME_ENDOSOMAL_VACUOLAR_PATHWAY	REACTOME_ENDOSOMAL_VACUOLAR_PATHWAY	11	0.594683	1.35368	0.118151	0.276538	0.20467	8716	tags=55%, list=24%, signal=41%	CTSV/HLA-A/HLA-F/HLA-G/HLA-B/CTSS
KEGG_JAK_STAT_SIGNALING_PATHWAY	KEGG_JAK_STAT_SIGNALING_PATHWAY	153	-0.270492	-1.18178	0.118343	0.276671	0.204769	8516	tags=41%, list=24%, signal=32%	PIK3R3/IFNAR2/IL7/PIK3R5/STAT1/CBLB/STAT6/STAT4/SOCS3/SPRED1/IL10RA/CNTFR/IL23A/AKT1/STAM2/STAT2/CBL/SPRY3/PIK3CB/PIAS1/IL20RB/SPRED2/IL12B/SPRY2/IL22RA2/STAT5B/IFNLR1/IFNAR1/IL13RA1/CREBBP/AKT3/IL20/PRLR/SOS1/IL5RA/JAK2/PIK3CA/CCND1/PTPN11/CNTF/EP300/IL23R/MPL/SPRY1/CSF3/JAK1/IL10/CSF2RB/IL9R/SOS2/IL6ST/CISH/IL2RB/IL13/SOCS2/PIK3R1/IL7R/IL21/PIK3CG/LIFR/LEPR/TSLP/GHR
REACTOME_SNRNP_ASSEMBLY	REACTOME_SNRNP_ASSEMBLY	54	0.400104	1.28983	0.118457	0.276671	0.204769	9379	tags=37%, list=26%, signal=27%	SNRPD2/SNRPE/SNRPF/SNRPB/SNRPD1/GEMIN7/SMN2/SNRPG/SMN1/GEMIN6/NUP93/WDR77/NUP62/SNRPD3/NUP210/RAE1/NUP43/NUP37/NUP188/NCBP2
BIOCARTA_PCAF_PATHWAY	BIOCARTA_PCAF_PATHWAY	13	-0.50012	-1.34731	0.118557	0.276671	0.204769	5167	tags=38%, list=14%, signal=33%	IRF2/NFKB1/CREBBP/KAT2B/IRF4
PID_ECADHERIN_STABILIZATION_PATHWAY	PID_ECADHERIN_STABILIZATION_PATHWAY	41	-0.353576	-1.25655	0.118812	0.276995	0.205009	8400	tags=46%, list=23%, signal=36%	ARF6/MYO6/MGAT3/NCKAP1/EPHA2/LIMA1/NCK1/LPP/CTNNB1/AFDN/DIAPH1/AQP3/MET/PLEKHA7/ROCK1/CTNND1/EGFR/CDH1/CYFIP2
REACTOME_BUDDING_AND_MATURATION_OF_HIV_VIRION	REACTOME_BUDDING_AND_MATURATION_OF_HIV_VIRION	28	0.457077	1.28914	0.118976	0.277105	0.205091	9682	tags=39%, list=27%, signal=29%	VPS28/UBA52/CHMP2A/CHMP4A/MVB12A/PPIA/RPS27A/CHMP4C/CHMP4B/VPS4A/VPS37C
KEGG_GLYCOSAMINOGLYCAN_BIOSYNTHESIS_KERATAN_SULFATE	KEGG_GLYCOSAMINOGLYCAN_BIOSYNTHESIS_KERATAN_SULFATE	15	-0.485265	-1.3548	0.119289	0.277529	0.205404	3442	tags=27%, list=10%, signal=24%	B3GNT2/ST3GAL1/B3GNT7/CHST4
PID_ERBB1_RECEPTOR_PROXIMAL_PATHWAY	PID_ERBB1_RECEPTOR_PROXIMAL_PATHWAY	35	-0.371719	-1.28091	0.119497	0.277529	0.205404	9326	tags=54%, list=26%, signal=40%	STAT3/NRAS/GSN/PIK3R3/GNAI3/PLCG1/STAT1/MAPK1/PIK3CB/KRAS/NCK1/SOS1/WASL/PIK3CA/PTPN11/GAB1/EGFR/RASA1/PIK3R1
REACTOME_PURINE_RIBONUCLEOSIDE_MONOPHOSPHATE_BIOSYNTHESIS	REACTOME_PURINE_RIBONUCLEOSIDE_MONOPHOSPHATE_BIOSYNTHESIS	12	0.573277	1.34408	0.119529	0.277529	0.205404	6313	tags=33%, list=18%, signal=27%	IMPDH1/ATIC/IMPDH2/ADSL
REACTOME_HOMOLOGY_DIRECTED_REPAIR	REACTOME_HOMOLOGY_DIRECTED_REPAIR	138	0.331824	1.2276	0.11971	0.277529	0.205404	10186	tags=39%, list=28%, signal=28%	SLX1A/H2BC10/H2BC9/EME1/H2AX/SLX1B/EXO1/H3-4/H2BU1/SIRT6/BLM/H4C13/H4C11/H4C2/UBA52/RAD51/H4C5/RFC4/H4C4/TIPIN/RMI2/RPS27A/ERCC1/POLD1/CCNA1/POLQ/PPP4C/H4C14/BABAM1/POLE4/DNA2/CHEK1/H4C15/XRCC3/UBE2I/RFC2/XRCC2/POLE2/H4C1/H4C6/H2BC3/RAD9A/PARP1/H2BC14/H2BC17/POLD2/H2BC11/CCNA2/PIAS4/XRCC1/FEN1/UBE2V2/RPA3/PCNA
REACTOME_PEPTIDE_HORMONE_BIOSYNTHESIS	REACTOME_PEPTIDE_HORMONE_BIOSYNTHESIS	14	0.559203	1.36348	0.119741	0.277529	0.205404	910	tags=21%, list=3%, signal=21%	CGA/INHA/LHB
KEGG_LONG_TERM_POTENTIATION	KEGG_LONG_TERM_POTENTIATION	70	-0.319104	-1.24923	0.12	0.277743	0.205562	6920	tags=37%, list=19%, signal=30%	RAP1B/ITPR3/PPP3CA/KRAS/PRKCB/MAP2K1/PLCB4/GNAQ/PPP1R12A/PRKCA/CAMK2D/CALML3/CREBBP/CHP1/GRIN2B/RPS6KA6/EP300/CACNA1C/CAMK4/ITPR2/ITPR1/RPS6KA2/CAMK2B/ADCY1/GRIN2A/CHP2
WP_ALZHEIMERS_DISEASE	WP_ALZHEIMERS_DISEASE	131	-0.274311	-1.17636	0.120219	0.277743	0.205562	7910	tags=27%, list=22%, signal=21%	IL1B/EIF2AK3/CASP7/MAPK1/CASP12/ATP2A2/ITPR3/PPP3CA/MIR760/CACNA1D/LRP1/ADAM10/PLCB4/TNF/GNAQ/LPL/MME/ADAM17/APP/CALML3/ERN1/CHP1/GRIN2B/MIR135A1/MIR3176/APAF1/BACE1/CACNA1C/ITPR2/ITPR1/SNCA/MIR30C2/FAS/GRIN2A/NOS1/CHP2
REACTOME_SIGNALING_BY_NOTCH4	REACTOME_SIGNALING_BY_NOTCH4	82	0.368109	1.26643	0.120261	0.277743	0.205562	10262	tags=44%, list=29%, signal=31%	PSMD4/PSMB4/TACC3/PSMB3/PSENEN/SEM1/KAT2A/UBA52/RBX1/HES5/PSMB6/PSMB9/PSEN2/RPS27A/PSMB8/PSME2/PSMB1/HEY1/PSMD13/PSMB7/PSMC4/PSMC5/PSMC3/YWHAZ/PSMD14/PSMA4/PSMB2/PSMB5/APH1A/PSMA7/PSMD8/PSMA3/PSMA5/NCSTN/PSMA1/PSMA2
REACTOME_SEMAPHORIN_INTERACTIONS	REACTOME_SEMAPHORIN_INTERACTIONS	64	-0.32158	-1.23943	0.120301	0.277743	0.205562	4245	tags=25%, list=12%, signal=22%	ITGA1/RHOB/DPYSL2/FYN/PLXNC1/MET/MYH11/ARHGEF12/MYH10/ROCK1/ITGB1/ERBB2/PTPRC/SEMA6D/SEMA5A/PLXNA4
REACTOME_UPTAKE_AND_ACTIONS_OF_BACTERIAL_TOXINS	REACTOME_UPTAKE_AND_ACTIONS_OF_BACTERIAL_TOXINS	29	-0.393878	-1.28865	0.120588	0.278137	0.205854	6015	tags=34%, list=17%, signal=29%	MAP2K1/SYT1/MAP2K6/GUCY2C/SV2B/ANTXR2/PDZD3/STX1B/ANTXR1/SYT2
REACTOME_APOPTOTIC_EXECUTION_PHASE	REACTOME_APOPTOTIC_EXECUTION_PHASE	52	-0.34157	-1.25444	0.120879	0.278537	0.20615	7763	tags=37%, list=22%, signal=29%	PKP1/CASP7/KPNA1/STK24/PRKCQ/BIRC2/CTNNB1/TJP2/DSP/GAS2/DSG2/TJP1/APC/BMX/ROCK1/SATB1/CDH1/OCLN/DSG1
REACTOME_GLYCOGEN_SYNTHESIS	REACTOME_GLYCOGEN_SYNTHESIS	16	-0.473249	-1.33357	0.121134	0.278855	0.206385	3391	tags=38%, list=9%, signal=34%	GBE1/UGP2/EPM2A/PGM2/PGM1/GYS2
PID_NFAT_3PATHWAY	PID_NFAT_3PATHWAY	53	-0.341279	-1.26064	0.121324	0.279021	0.206508	7481	tags=40%, list=21%, signal=31%	NFATC2/YWHAQ/PPP3CA/PRKCQ/MAP3K1/PRKCZ/PRKCB/PRKCA/RCAN2/CREBBP/CHP1/EP300/BCL2/NFATC3/PRKCE/PRKCH/CSNK1A1/AKAP5/CAMK4/NR4A1/RCAN1
REACTOME_REGULATION_OF_HSF1_MEDIATED_HEAT_SHOCK_RESPONSE	REACTOME_REGULATION_OF_HSF1_MEDIATED_HEAT_SHOCK_RESPONSE	82	0.365976	1.25909	0.121569	0.279258	0.206684	10766	tags=41%, list=30%, signal=29%	HSPB1/HSPA6/HSPA1A/RPS19BP1/HSPA1B/HSF1/CRYBA4/RLN1/SERPINH1/MAPKAPK2/BAG2/MRPL18/HIKESHI/MAPK3/GML/NUP93/FKBP4/DNAJB1/HSPA4/HSPH1/BAG3/NUP62/HSPB2/HSPA5/NUP210/RAE1/NUP43/NUP37/NUP188/SEC13/RPA3/DNAJC2/HSPA14/DNAJC7
REACTOME_TRANSFERRIN_ENDOCYTOSIS_AND_RECYCLING	REACTOME_TRANSFERRIN_ENDOCYTOSIS_AND_RECYCLING	31	0.451789	1.30869	0.121662	0.279258	0.206684	7873	tags=39%, list=22%, signal=30%	ATP6V1G3/ATP6V0D2/ATP6V1B1/ATP6V0A4/ATP6V0B/ATP6V1F/TCIRG1/ATP6V1C2/ATP6V0E1/ATP6V1C1/ATP6AP1/ATP6V1E1
REACTOME_OTHER_SEMAPHORIN_INTERACTIONS	REACTOME_OTHER_SEMAPHORIN_INTERACTIONS	19	-0.452561	-1.34317	0.121951	0.279601	0.206938	4245	tags=37%, list=12%, signal=32%	ITGA1/PLXNC1/ITGB1/PTPRC/SEMA6D/SEMA5A/PLXNA4
REACTOME_DNA_DAMAGE_RECOGNITION_IN_GG_NER	REACTOME_DNA_DAMAGE_RECOGNITION_IN_GG_NER	38	0.42601	1.29302	0.122126	0.279601	0.206938	8862	tags=42%, list=25%, signal=32%	TFPT/UBA52/RBX1/ACTR5/RPS27A/INO80B/MCRS1/RUVBL1/ACTB/INO80C/COPS5/COPS7B/COPS6/GPS1/INO80E/PARP1
PID_THROMBIN_PAR1_PATHWAY	PID_THROMBIN_PAR1_PATHWAY	43	-0.347939	-1.24746	0.122517	0.279601	0.206938	8603	tags=47%, list=24%, signal=35%	GNAI3/F2/ROCK2/GNA13/GNG2/GRK3/SNX1/PRKCB/NOS3/GNAQ/ARRB1/TRPC6/PRKCA/PIK3CA/AKAP13/ROCK1/F2R/PIK3R1/GNA14/GNAO1
REACTOME_SIGNALING_BY_SCF_KIT	REACTOME_SIGNALING_BY_SCF_KIT	43	-0.350869	-1.25797	0.122517	0.279601	0.206938	7632	tags=47%, list=21%, signal=37%	GRB10/YES1/CBL/KRAS/STAT5B/GRAP2/PRKCA/TEC/FER/SOCS6/SOS1/SH2B3/JAK2/PIK3CA/PTPN11/FYN/GRAP/PIK3R1/KIT/CMA1
REACTOME_TRANSPORT_OF_VITAMINS_NUCLEOSIDES_AND_RELATED_MOLECULES	REACTOME_TRANSPORT_OF_VITAMINS_NUCLEOSIDES_AND_RELATED_MOLECULES	44	-0.349626	-1.25552	0.122517	0.279601	0.206938	3114	tags=25%, list=9%, signal=23%	SLCO4C1/SLC35A3/ALB/ARL2BP/SLC28A1/SLC35D1/SLCO2A1/SLCO1A2/SLC16A2/SLCO2B1/SLCO1B1
WP_NEURODEGENERATION_WITH_BRAIN_IRON_ACCUMULATION_NBIA_SUBTYPES_PATHWAY	WP_NEURODEGENERATION_WITH_BRAIN_IRON_ACCUMULATION_NBIA_SUBTYPES_PATHWAY	44	-0.346811	-1.24541	0.122517	0.279601	0.206938	6645	tags=25%, list=19%, signal=20%	DCAF17/ATG2A/PIK3C3/PRKAA1/BECN1/SPTLC1/MTOR/PIK3R4/CP/SCP2/FA2H
REACTOME_G0_AND_EARLY_G1	REACTOME_G0_AND_EARLY_G1	27	0.459196	1.28764	0.122914	0.280238	0.207409	10186	tags=56%, list=28%, signal=40%	MYBL2/CDC25A/CDK1/CDC6/LIN37/CCNA1/E2F1/E2F5/E2F4/LIN9/TOP2A/CCNA2/HDAC1/RBL1/PCNA
KEGG_INOSITOL_PHOSPHATE_METABOLISM	KEGG_INOSITOL_PHOSPHATE_METABOLISM	54	-0.335873	-1.25794	0.123188	0.280596	0.207674	8570	tags=43%, list=24%, signal=32%	PLCG1/IMPA1/PLCE1/MINPP1/PTEN/PI4KA/PLCZ1/ITPKB/PIP5K1B/PIK3CB/PIK3C3/PLCB4/INPP5B/IPPK/PIK3CA/PLCG2/PIKFYVE/SYNJ1/PIK3C2A/PIK3C2G/INPP4B/PIK3CG/ALDH6A1
PID_LIS1_PATHWAY	PID_LIS1_PATHWAY	28	0.454339	1.28142	0.123494	0.281023	0.20799	4101	tags=21%, list=11%, signal=19%	CDK5R2/PAFAH1B3/RELN/PLA2G7/NUDC/LRP8
REACTOME_GRB2_EVENTS_IN_ERBB2_SIGNALING	REACTOME_GRB2_EVENTS_IN_ERBB2_SIGNALING	16	-0.470296	-1.32524	0.123711	0.281248	0.208157	4187	tags=44%, list=12%, signal=39%	KRAS/SOS1/NRG3/EREG/EGFR/ERBB2/NRG1
REACTOME_INTERCONVERSION_OF_NUCLEOTIDE_DI_AND_TRIPHOSPHATES	REACTOME_INTERCONVERSION_OF_NUCLEOTIDE_DI_AND_TRIPHOSPHATES	29	0.458292	1.3034	0.123867	0.281333	0.20822	10959	tags=52%, list=31%, signal=36%	NME1/GUK1/DTYMK/NME3/TXN/AK8/AK1/NME2/NME4/TXNRD1/DCTPP1/GLRX/AK6/RRM2/GSR
REACTOME_SIALIC_ACID_METABOLISM	REACTOME_SIALIC_ACID_METABOLISM	33	-0.376954	-1.26847	0.124224	0.281754	0.208531	5209	tags=30%, list=15%, signal=26%	NEU3/ST3GAL6/ST6GALNAC3/ST3GAL1/ST6GALNAC1/ST8SIA2/GNE/ST6GAL2/ST8SIA3/ST8SIA6
KEGG_ASCORBATE_AND_ALDARATE_METABOLISM	KEGG_ASCORBATE_AND_ALDARATE_METABOLISM	25	-0.413839	-1.30374	0.124638	0.281754	0.208531	3947	tags=40%, list=11%, signal=36%	ALDH2/ALDH1B1/UGT2B15/UGT2B7/UGT1A1/UGT2B10/UGT2A3/UGT1A4/UGT1A3/UGT2B17
PID_HES_HEY_PATHWAY	PID_HES_HEY_PATHWAY	48	-0.345202	-1.26099	0.125	0.281754	0.208531	6233	tags=38%, list=17%, signal=31%	CDKN1B/HEY2/SPEN/RB1/NCOA1/CAMK2D/CREBBP/CD4/JAK2/EP300/NCOR1/MAML2/GATA1/RCAN1/AR/KDR/GHR/ASCL1
PID_PI3KCI_PATHWAY	PID_PI3KCI_PATHWAY	48	-0.345778	-1.26309	0.125	0.281754	0.208531	8746	tags=50%, list=24%, signal=38%	PIK3R3/CYTH1/PLCG1/PIK3R5/ARF6/PLEKHA2/ARAP3/PTEN/BLNK/YES1/SGK1/PIK3CB/KRAS/PLEKHA1/CYTH3/DAPP1/PIK3CA/PLCG2/PDPK1/FYN/ITK/PIK3R1/PIK3CG/BLK
REACTOME_ADENYLATE_CYCLASE_INHIBITORY_PATHWAY	REACTOME_ADENYLATE_CYCLASE_INHIBITORY_PATHWAY	14	-0.49447	-1.33464	0.125	0.281754	0.208531	8638	tags=71%, list=24%, signal=54%	GNAI1/ADCY5/GNAI3/ADCY4/ADCY6/ADCY3/GNAT3/ADCY7/ADCY9/ADCY1
REACTOME_METHYLATION	REACTOME_METHYLATION	14	-0.492026	-1.32805	0.125	0.281754	0.208531	8052	tags=64%, list=22%, signal=50%	TPMT/N6AMT1/MAT2A/MTRR/MTR/MAT2B/MAT1A/AS3MT/CYP1A2
REACTOME_RUNX3_REGULATES_NOTCH_SIGNALING	REACTOME_RUNX3_REGULATES_NOTCH_SIGNALING	14	-0.495656	-1.33784	0.125	0.281754	0.208531	4568	tags=64%, list=13%, signal=56%	JAG1/NOTCH1/RUNX3/MAML1/CREBBP/MAML3/EP300/MAML2/KAT2B
WP_OMEGA3OMEGA6_FA_SYNTHESIS	WP_OMEGA3OMEGA6_FA_SYNTHESIS	14	-0.492823	-1.3302	0.125	0.281754	0.208531	7321	tags=50%, list=20%, signal=40%	PLA2G4B/FADS1/ELOVL5/ACOT2/PLA2G4A/ACSL1/ACOX1
PID_ERBB1_INTERNALIZATION_PATHWAY	PID_ERBB1_INTERNALIZATION_PATHWAY	41	-0.351349	-1.24864	0.125413	0.282416	0.209021	8746	tags=54%, list=24%, signal=41%	STAMBP/CHMP3/NRAS/PIK3R3/UBE2D3/CBLB/AMPH/EPS15/CBL/ITSN1/PIK3CB/KRAS/SPRY2/LRIG1/USP8/SOS1/PIK3CA/ZFYVE28/SYNJ1/EGFR/PIK3R1/SH3GL2
PID_HNF3A_PATHWAY	PID_HNF3A_PATHWAY	43	0.41044	1.27701	0.125714	0.282722	0.209247	1377	tags=14%, list=4%, signal=13%	KLK3/GCG/INS/TFF1/SCGB1A1/SFTPA1
PID_HIV_NEF_PATHWAY	PID_HIV_NEF_PATHWAY	35	-0.366782	-1.26389	0.125786	0.282722	0.209247	10630	tags=51%, list=30%, signal=36%	TNFRSF1A/TRAF1/CASP3/CASP8/RIPK1/BAG4/MAPK8/CHUK/CFLAR/CASP7/CRADD/TNF/MAP3K14/NFKB1/BCL2/APAF1/MAP3K5/FAS
REACTOME_SIGNALING_BY_NUCLEAR_RECEPTORS	REACTOME_SIGNALING_BY_NUCLEAR_RECEPTORS	295	-0.230308	-1.11033	0.126214	0.283414	0.20976	7193	tags=31%, list=20%, signal=25%	NCOA2/H3C10/SCD/ALDH1A2/KDM3A/GNG2/RARB/RDH11/MYLIP/CETP/GNB5/KRAS/MED1/AGO4/ESR2/GNG12/GPAM/CHD1/CDKN1B/CCNT1/PRKCZ/NOS3/KDM1B/POLR2B/GNAT3/TNRC6C/GNG10/KDM4A/NCOA1/POLR2A/TBL1X/STRN/STAG2/H2BC13/CREBBP/MMP2/ZNF217/AKT3/GTF2A1/SMC1A/H4-16/TNRC6A/DLD/TNRC6B/H3C1/PIK3CA/CCND1/PDPK1/CAV2/EP300/KANK1/H3C13/GREB1/ABCA1/S1PR3/BCL2/H3C6/AREG/NCOR1/H2BC7/EREG/ANGPTL3/PDK2/ABCG5/ADH1C/EGFR/PLIN1/KAT2B/ST…
REACTOME_ACTIVATED_NTRK2_SIGNALS_THROUGH_FRS2_AND_FRS3	REACTOME_ACTIVATED_NTRK2_SIGNALS_THROUGH_FRS2_AND_FRS3	11	-0.526801	-1.35529	0.126794	0.284392	0.210484	4187	tags=73%, list=12%, signal=64%	NTF4/NRAS/KRAS/SOS1/PTPN11/FRS2/BDNF/NTRK2
WP_GASTRIC_CANCER_NETWORK_1	WP_GASTRIC_CANCER_NETWORK_1	29	0.457156	1.30017	0.126888	0.284392	0.210484	8356	tags=41%, list=23%, signal=32%	S100P/MYBL2/UBE2C/CENPF/TPX2/AURKA/KIF15/CCNA1/RUVBL1/LIN9/MCM4/TOP2A
REACTOME_G_ALPHA_12_13_SIGNALLING_EVENTS	REACTOME_G_ALPHA_12_13_SIGNALLING_EVENTS	80	-0.306648	-1.21782	0.127049	0.284485	0.210552	7952	tags=44%, list=22%, signal=34%	ROCK2/ARHGEF3/GNG7/GNA13/MCF2L/GNG2/ITSN1/GNB5/ARHGEF15/GNG12/PREX1/NET1/ARHGEF37/ARHGEF9/GNG10/TRIO/ARHGEF17/SOS1/ARHGEF10/RHOB/RASGRF2/ARHGEF18/ARHGEF6/AKAP13/ABR/SOS2/ARHGEF38/KALRN/ARHGEF12/ARHGEF26/ROCK1/TIAM1/FGD4/ADRA1B/ADRA1A
PID_TELOMERASE_PATHWAY	PID_TELOMERASE_PATHWAY	67	-0.316448	-1.23532	0.127413	0.285031	0.210957	8639	tags=39%, list=24%, signal=29%	IFNAR2/NBN/TINF2/SMAD3/RPS6KB1/AKT1/SIN3A/MAPK1/SP1/SP3/ZNFX1/CDKN1B/POT1/RAD50/TNKS/UBE3A/NFKB1/ATM/CCND1/MTOR/NR2F2/WRN/EGFR/SMG6/FOS/ESR1
REACTOME_NUCLEAR_EVENTS_KINASE_AND_TRANSCRIPTION_FACTOR_ACTIVATION_	REACTOME_NUCLEAR_EVENTS_KINASE_AND_TRANSCRIPTION_FACTOR_ACTIVATION_	61	-0.319359	-1.22257	0.12782	0.285672	0.211431	5754	tags=31%, list=16%, signal=26%	PPP2CB/EGR4/F3/ID2/REST/MEF2C/PPP2R1B/TCF12/ID4/EP300/RPS6KA5/EGR1/MEF2A/RPS6KA2/EGR2/FOS/EGR3/ASCL1/FOSB
REACTOME_PRE_NOTCH_PROCESSING_IN_GOLGI	REACTOME_PRE_NOTCH_PROCESSING_IN_GOLGI	18	-0.458086	-1.33726	0.128	0.285807	0.211531	11360	tags=72%, list=32%, signal=49%	ST3GAL3/TMED2/MFNG/NOTCH1/ATP2A3/B4GALT1/ATP2A2/RAB6A/NOTCH4/ST3GAL6/NOTCH3/SEL1L/NOTCH2
KEGG_PHOSPHATIDYLINOSITOL_SIGNALING_SYSTEM	KEGG_PHOSPHATIDYLINOSITOL_SIGNALING_SYSTEM	76	-0.313447	-1.23769	0.128631	0.286945	0.212373	8884	tags=43%, list=25%, signal=33%	INPP5D/PIK3R3/PLCG1/IMPA1/PIK3R5/PLCE1/PTEN/PI4KA/PLCZ1/ITPR3/ITPKB/PIP5K1B/PIK3CB/DGKH/PRKCB/PIK3C3/PLCB4/INPP5B/DGKE/PRKCA/CALML3/IPPK/PIK3CA/PLCG2/PIKFYVE/SYNJ1/PIK3C2A/PIK3C2G/ITPR2/ITPR1/INPP4B/PIK3R1/PIK3CG
KEGG_VASOPRESSIN_REGULATED_WATER_REABSORPTION	KEGG_VASOPRESSIN_REGULATED_WATER_REABSORPTION	44	-0.345745	-1.24158	0.129139	0.287809	0.213013	8069	tags=34%, list=23%, signal=26%	CREB1/PRKACB/DYNLL2/ADCY6/DYNC1I2/CREB3L2/ADCY3/AVPR2/CREB5/ADCY9/AQP3/DYNC1I1/DYNC1LI2/DYNC2H1/AQP4
REACTOME_SHC1_EVENTS_IN_EGFR_SIGNALING	REACTOME_SHC1_EVENTS_IN_EGFR_SIGNALING	14	-0.487468	-1.31574	0.130208	0.289898	0.214559	4187	tags=43%, list=12%, signal=38%	KRAS/SOS1/AREG/EREG/EGFR/TGFA
PID_RAS_PATHWAY	PID_RAS_PATHWAY	30	-0.394802	-1.29545	0.130564	0.289898	0.214559	6477	tags=53%, list=18%, signal=44%	KRAS/RASA2/PRKCZ/PRKCB/SYNGAP1/PRKCA/RASGRP2/NF1/SOS1/RASGRF2/PRKCE/SOS2/RASGRP1/RASGRF1/RASA1/CAMK2B
REACTOME_FOXO_MEDIATED_TRANSCRIPTION_OF_OXIDATIVE_STRESS_METABOLIC_AND_NEURONAL_GENES	REACTOME_FOXO_MEDIATED_TRANSCRIPTION_OF_OXIDATIVE_STRESS_METABOLIC_AND_NEURONAL_GENES	30	-0.392706	-1.28857	0.130564	0.289898	0.214559	3676	tags=30%, list=10%, signal=27%	PPARGC1A/NR3C1/FOXO1/G6PC/CAT/PCK1/ABCA6/TRIM63/PLXNA4
WP_SPHINGOLIPID_PATHWAY	WP_SPHINGOLIPID_PATHWAY	30	-0.394832	-1.29555	0.130564	0.289898	0.214559	8414	tags=53%, list=23%, signal=41%	KDSR/UGCG/SGPL1/CERS6/SPHK2/SPTLC2/SGMS1/SPTLC1/PLPP1/SPTLC3/CERT1/SERINC1/ASAH2/SGMS2/SGPP2/ACER1
REACTOME_FORMATION_OF_SENESCENCE_ASSOCIATED_HETEROCHROMATIN_FOCI_SAHF_	REACTOME_FORMATION_OF_SENESCENCE_ASSOCIATED_HETEROCHROMATIN_FOCI_SAHF_	17	0.527146	1.33805	0.13141	0.291505	0.215748	11388	tags=59%, list=32%, signal=40%	HMGA2/HMGA1/H1-2/H1-1/H1-5/H1-4/H1-3/ASF1A/HIRA/LMNB1
REACTOME_DNA_DOUBLE_STRAND_BREAK_REPAIR	REACTOME_DNA_DOUBLE_STRAND_BREAK_REPAIR	166	0.318348	1.19428	0.131737	0.291957	0.216082	9358	tags=34%, list=26%, signal=25%	EYA4/SLX1A/H2BC10/H2BC9/EME1/H2AX/SLX1B/EXO1/H3-4/H2BU1/SIRT6/EYA1/BLM/H4C13/H4C11/H4C2/UBA52/RAD51/H4C5/RFC4/H4C4/TIPIN/KPNA2/RMI2/RPS27A/ERCC1/POLD1/CCNA1/POLQ/PPP4C/H4C14/BABAM1/POLE4/DNA2/CHEK1/H4C15/XRCC3/UBE2I/RFC2/XRCC2/POLE2/H4C1/H4C6/H2BC3/RAD9A/PARP1/H2BC14/H2BC17/DCLRE1C/POLD2/H2BC11/CCNA2/XRCC6/CHEK2/PIAS4/XRCC1
REACTOME_INTERLEUKIN_3_INTERLEUKIN_5_AND_GM_CSF_SIGNALING	REACTOME_INTERLEUKIN_3_INTERLEUKIN_5_AND_GM_CSF_SIGNALING	48	-0.341289	-1.24669	0.131944	0.292145	0.216222	7624	tags=35%, list=21%, signal=28%	BLNK/YES1/RAPGEF1/CBL/PIK3CB/STAT5B/TEC/SOS1/IL5RA/JAK2/PIK3CA/PTPN11/FYN/JAK1/CSF2RB/IL2RB/PIK3R1
BIOCARTA_TNFR2_PATHWAY	BIOCARTA_TNFR2_PATHWAY	17	-0.455273	-1.29485	0.132275	0.292448	0.216446	11034	tags=65%, list=31%, signal=45%	TRAF3/TNFRSF1B/TRAF1/RIPK1/CHUK/TANK/MAP3K1/TNFAIP3/MAP3K14/NFKB1/DUSP1
REACTOME_NF_KB_ACTIVATION_THROUGH_FADD_RIP_1_PATHWAY_MEDIATED_BY_CASPASE_8_AND_10	REACTOME_NF_KB_ACTIVATION_THROUGH_FADD_RIP_1_PATHWAY_MEDIATED_BY_CASPASE_8_AND_10	12	-0.514684	-1.3637	0.132353	0.292448	0.216446	10520	tags=67%, list=29%, signal=47%	IKBKB/TRIM25/CASP8/RIPK1/CHUK/CASP10/DDX58/IFIH1
REACTOME_NUCLEOBASE_CATABOLISM	REACTOME_NUCLEOBASE_CATABOLISM	36	-0.360852	-1.23923	0.13245	0.292448	0.216446	2739	tags=31%, list=8%, signal=28%	GDA/NT5E/UPB1/NT5C2/DPYS/ENTPD5/DPYD/AGXT2/NT5C1B/XDH/UPP2
WP_TRANSLATION_INHIBITORS_IN_CHRONICALLY_ACTIVATED_PDGFRA_CELLS	WP_TRANSLATION_INHIBITORS_IN_CHRONICALLY_ACTIVATED_PDGFRA_CELLS	46	-0.341514	-1.23877	0.132653	0.292624	0.216576	9704	tags=57%, list=27%, signal=41%	MAP2K5/MAPK14/MAP2K4/AKT2/EIF4G1/PIK3R3/MAPK8/RPS6KB1/PDCD4/EIF4A2/AKT1/MAPK1/EIF4E/PIK3CB/EIF4B/EIF4G3/MAP2K1/PRKCA/AKT3/MAP2K6/PIK3CA/MTOR/RPS6KA5/RPS6KA2/PIK3R1/PIK3CG
REACTOME_CHK1_CHK2_CDS1_MEDIATED_INACTIVATION_OF_CYCLIN_B_CDK1_COMPLEX	REACTOME_CHK1_CHK2_CDS1_MEDIATED_INACTIVATION_OF_CYCLIN_B_CDK1_COMPLEX	13	0.556874	1.34487	0.13355	0.294093	0.217663	6893	tags=46%, list=19%, signal=37%	SFN/CDK1/CCNB1/CDC25C/CHEK1/YWHAZ
REACTOME_RECEPTOR_TYPE_TYROSINE_PROTEIN_PHOSPHATASES	REACTOME_RECEPTOR_TYPE_TYROSINE_PROTEIN_PHOSPHATASES	20	-0.435751	-1.31695	0.13369	0.294093	0.217663	5295	tags=60%, list=15%, signal=51%	PPFIA1/NTRK3/PPFIBP2/PTPRF/IL1RAP/IL1RAPL1/PPFIBP1/PTPRS/SLITRK3/PTPRD/SLITRK6/IL1RAPL2
REACTOME_SIGNALING_BY_PDGFR_IN_DISEASE	REACTOME_SIGNALING_BY_PDGFR_IN_DISEASE	20	-0.432139	-1.30604	0.13369	0.294093	0.217663	6630	tags=60%, list=19%, signal=49%	STAT3/NRAS/STAT1/PIK3CB/KRAS/STRN/GOLGA4/SOS1/PIK3CA/KANK1/PIK3R1/KDR
REACTOME_SMOOTH_MUSCLE_CONTRACTION	REACTOME_SMOOTH_MUSCLE_CONTRACTION	38	-0.349496	-1.23022	0.133987	0.294276	0.217799	5310	tags=29%, list=15%, signal=25%	GUCY1B1/LMOD1/ITGA1/GUCY1A1/TPM1/MYH11/CALD1/SORBS1/GUCY1A2/MYLK/MYL7
WP_HEDGEHOG_SIGNALING_PATHWAY_NETPATH	WP_HEDGEHOG_SIGNALING_PATHWAY_NETPATH	16	-0.465619	-1.31207	0.134021	0.294276	0.217799	9565	tags=62%, list=27%, signal=46%	GLI3/SUFU/SMO/SIN3A/PTCH2/SHH/DHH/ARNTL/PTCH1/GLI2
REACTOME_ER_TO_GOLGI_ANTEROGRADE_TRANSPORT	REACTOME_ER_TO_GOLGI_ANTEROGRADE_TRANSPORT	155	0.323291	1.20602	0.134845	0.295592	0.218773	9421	tags=30%, list=26%, signal=22%	TUBA3E/TUBA3C/INS/SPTA1/FOLR1/TUBB8/COL7A1/TUBAL3/TUBA4B/CNIH3/CAPZA3/TUBA4A/TUBB8B/LMAN1L/TRAPPC1/TMED3/GRIA1/TUBB4B/CNIH2/COPE/TRAPPC2L/DYNLL1/TUBA3D/TMED9/ARF1/TUBB4A/ARFGAP1/TUBA1C/TUBB2B/LMAN2/COPZ1/YKT6/TUBA1A/CTSC/TMEM115/KDELR1/COG2/ARF5/TRAPPC4/TUBB2A/TRAPPC6A/DYNC1LI1/TRAPPC9/COG4/TRAPPC3/COPA
REACTOME_PROCESSIVE_SYNTHESIS_ON_THE_LAGGING_STRAND	REACTOME_PROCESSIVE_SYNTHESIS_ON_THE_LAGGING_STRAND	15	0.539316	1.3227	0.134868	0.295592	0.218773	10186	tags=53%, list=28%, signal=38%	POLD1/DNA2/POLA2/POLD2/LIG1/FEN1/RPA3/PCNA
WP_LNCRNAMEDIATED_MECHANISMS_OF_THERAPEUTIC_RESISTANCE	WP_LNCRNAMEDIATED_MECHANISMS_OF_THERAPEUTIC_RESISTANCE	12	0.566662	1.32857	0.136364	0.298588	0.22099	2894	tags=42%, list=8%, signal=38%	HOTAIR/MEG3/WNT6/LINC00970/VLDLR-AS1
PID_P38_ALPHA_BETA_PATHWAY	PID_P38_ALPHA_BETA_PATHWAY	30	-0.387703	-1.27215	0.136499	0.298588	0.22099	10410	tags=53%, list=29%, signal=38%	PAK3/MAPK14/RIPK1/LCK/MAP2K4/MAP3K12/DUSP10/RALB/YES1/MAP3K3/TRAF6/MAP2K6/FYN/DUSP16/DUSP1/BLK
WP_PRADERWILLI_AND_ANGELMAN_SYNDROME	WP_PRADERWILLI_AND_ANGELMAN_SYNDROME	63	0.384314	1.26282	0.136612	0.298588	0.22099	6162	tags=38%, list=17%, signal=32%	CGA/INS/KISS1/TACR3/HTR2C/LHB/NDN/CDKN2A/OCA2/MSX1/GABRR1/SNRPN/GABRR3/GABRA5/CDC6/PCSK1/DLX5/GABRG2/GABRG3/GABRG1/E2F1/GNRH1/SNURF/GABRD
REACTOME_SYNTHESIS_OF_ACTIVE_UBIQUITIN_ROLES_OF_E1_AND_E2_ENZYMES	REACTOME_SYNTHESIS_OF_ACTIVE_UBIQUITIN_ROLES_OF_E1_AND_E2_ENZYMES	30	0.448818	1.2812	0.136842	0.298732	0.221097	7089	tags=27%, list=20%, signal=21%	UBE2C/UBE2S/UBE2T/UCHL3/UBA52/RPS27A/CDC34/UBE2L3
WP_PROLACTIN_SIGNALING_PATHWAY	WP_PROLACTIN_SIGNALING_PATHWAY	76	-0.309846	-1.22347	0.136929	0.298732	0.221097	8467	tags=42%, list=24%, signal=32%	MAPK8/STAT1/GSK3B/RPS6KB1/SOCS3/AKT1/MAPK1/CBL/PIK3CB/MAP2K1/STAT5B/TEC/IRS2/NFKB1/PRLR/SOS1/JAK2/PIK3CA/PTPN11/FYN/MTOR/JAK1/IRS1/CISH/RPS6KA2/ITGB1/ERBB2/SOCS2/PIK3R1/NOS2/PIK3CG/FOS
REACTOME_ACYL_CHAIN_REMODELLING_OF_PG	REACTOME_ACYL_CHAIN_REMODELLING_OF_PG	18	0.515407	1.31838	0.137161	0.298963	0.221268	2485	tags=22%, list=7%, signal=21%	PLA2G4F/PLA2G3/LPCAT1/PLA2G2E
REACTOME_G1_S_SPECIFIC_TRANSCRIPTION	REACTOME_G1_S_SPECIFIC_TRANSCRIPTION	29	0.450211	1.28042	0.137462	0.299345	0.221551	10395	tags=59%, list=29%, signal=42%	CDT1/CDC25A/CDC45/CDK1/TK1/CDC6/LIN37/CCNA1/E2F1/ORC1/E2F5/E2F4/LIN9/HDAC1/RBL1/PCNA/RRM2
